# Supplementary material
Source: publisher figshare collection journal article supplement (https://acs.figshare.com/ndownloader/files/10523416)
Supplement: Supplementary file 1 [file 10523416]

 
data_compound2
 
_audit_creation_method            'SHELXL-2016/6'
_shelx_SHELXL_version_number      '2016/6'
_chemical_name_systematic         ?
_chemical_name_common             ?
_chemical_melting_point           ?
_chemical_formula_moiety          ?
_chemical_formula_sum
 'C112 H100 Cu4 N12 O37' 
_chemical_formula_weight          2460.19

loop_
 _atom_type_symbol
 _atom_type_description
 _atom_type_scat_dispersion_real
 _atom_type_scat_dispersion_imag
 _atom_type_scat_source
 'C'  'C'   0.0033   0.0016
 'International Tables Vol C Tables 4.2.6.8 and 6.1.1.4'
 'H'  'H'   0.0000   0.0000
 'International Tables Vol C Tables 4.2.6.8 and 6.1.1.4'
 'N'  'N'   0.0061   0.0033
 'International Tables Vol C Tables 4.2.6.8 and 6.1.1.4'
 'O'  'O'   0.0106   0.0060
 'International Tables Vol C Tables 4.2.6.8 and 6.1.1.4'
 'Cu'  'Cu'   0.3201   1.2651
 'International Tables Vol C Tables 4.2.6.8 and 6.1.1.4'
 
_space_group_crystal_system       monoclinic
_space_group_IT_number            15
_space_group_name_H-M_alt         'C 2/c'
_space_group_name_Hall            '-C 2yc'
 
_shelx_space_group_comment
;
The symmetry employed for this shelxl refinement is uniquely defined
by the following loop, which should always be used as a source of
symmetry information in preference to the above space-group names.
They are only intended as comments.
;
 
loop_
 _space_group_symop_operation_xyz
 'x, y, z'
 '-x, y, -z+1/2'
 'x+1/2, y+1/2, z'
 '-x+1/2, y+1/2, -z+1/2'
 '-x, -y, -z'
 'x, -y, z-1/2'
 '-x+1/2, -y+1/2, -z'
 'x+1/2, -y+1/2, z-1/2'
 
_cell_length_a                    44.8511(10)
_cell_length_b                    19.0460(4)
_cell_length_c                    14.7115(3)
_cell_angle_alpha                 90
_cell_angle_beta                  102.3800(10)
_cell_angle_gamma                 90
_cell_volume                      12274.8(5)
_cell_formula_units_Z             4
_cell_measurement_temperature     295(2)
_cell_measurement_reflns_used     8355
_cell_measurement_theta_min       2.15
_cell_measurement_theta_max       21.219
 
_exptl_crystal_description        'block'
_exptl_crystal_colour             'blue'
_exptl_crystal_density_meas       ?
_exptl_crystal_density_method     ?
_exptl_crystal_density_diffrn     1.331          
_exptl_crystal_F_000              5072
_exptl_transmission_factor_min    ?
_exptl_transmission_factor_max    ?
_exptl_crystal_size_max           0.011
_exptl_crystal_size_mid           0.008
_exptl_crystal_size_min           0.005
_exptl_absorpt_coefficient_mu     0.766
_shelx_estimated_absorpt_T_min    0.992
_shelx_estimated_absorpt_T_max    0.996
_exptl_absorpt_correction_type    EMPIRICAL
_exptl_absorpt_correction_T_min   0.9173
_exptl_absorpt_correction_T_max   0.9636
_exptl_absorpt_process_details    SADABS
_exptl_absorpt_special_details    ?
_diffrn_ambient_temperature       295(2)
_diffrn_radiation_wavelength      0.71073
_diffrn_radiation_type            MoK\a
_diffrn_source                    'fine-focus sealed tube'
_diffrn_measurement_device_type   Bruker
_diffrn_measurement_method        '\f and \w scans'
_diffrn_detector_area_resol_mean  ?
_diffrn_reflns_number             81471
_diffrn_reflns_av_unetI/netI      0.0584
_diffrn_reflns_av_R_equivalents   0.0849
_diffrn_reflns_limit_h_min        -50
_diffrn_reflns_limit_h_max        50
_diffrn_reflns_limit_k_min        -21
_diffrn_reflns_limit_k_max        21
_diffrn_reflns_limit_l_min        -16
_diffrn_reflns_limit_l_max        16
_diffrn_reflns_theta_min          1.757
_diffrn_reflns_theta_max          23.842
_diffrn_reflns_theta_full         23.842
_diffrn_measured_fraction_theta_max   0.998
_diffrn_measured_fraction_theta_full  0.998
_diffrn_reflns_Laue_measured_fraction_max    0.998
_diffrn_reflns_Laue_measured_fraction_full   0.998
_diffrn_reflns_point_group_measured_fraction_max   0.998
_diffrn_reflns_point_group_measured_fraction_full  0.998
_reflns_number_total              9461
_reflns_number_gt                 6004
_reflns_threshold_expression      'I > 2\s(I)'
_reflns_Friedel_coverage          0.000
_reflns_Friedel_fraction_max      .
_reflns_Friedel_fraction_full     .
 
_reflns_special_details
;
 Reflections were merged by SHELXL according to the crystal
 class for the calculation of statistics and refinement.
 
 _reflns_Friedel_fraction is defined as the number of unique
 Friedel pairs measured divided by the number that would be
 possible theoretically, ignoring centric projections and
 systematic absences.
;
 
_computing_data_collection        'Bruker APEX3'
_computing_cell_refinement        'Bruker SAINT'
_computing_data_reduction         'Bruker SAINT  A'
_computing_structure_solution     'SHELXT (Sheldrick, 2014)'
_computing_structure_refinement 'SHELXL-2016/6 (Sheldrick, 2016)'
_computing_molecular_graphics     'Bruker SHELXTL'
_computing_publication_material   'Bruker SHELXTL'
_refine_special_details           ?
_refine_ls_structure_factor_coef  Fsqd
_refine_ls_matrix_type            full
_refine_ls_weighting_scheme       calc
_refine_ls_weighting_details
'w=1/[\s^2^(Fo^2^)+(0.1143P)^2^+57.7607P] where P=(Fo^2^+2Fc^2^)/3'
_atom_sites_solution_primary      ?
_atom_sites_solution_secondary    ?
_atom_sites_solution_hydrogens    NOREF
_refine_ls_hydrogen_treatment     constr
_refine_ls_extinction_method      none
_refine_ls_extinction_coef        .
_refine_ls_number_reflns          9461
_refine_ls_number_parameters      747
_refine_ls_number_restraints      1
_refine_ls_R_factor_all           0.1148
_refine_ls_R_factor_gt            0.0680
_refine_ls_wR_factor_ref          0.2170
_refine_ls_wR_factor_gt           0.1871
_refine_ls_goodness_of_fit_ref    1.034
_refine_ls_restrained_S_all       1.035
_refine_ls_shift/su_max           0.001
_refine_ls_shift/su_mean          0.000
 
loop_
 _atom_site_label
 _atom_site_type_symbol
 _atom_site_fract_x
 _atom_site_fract_y
 _atom_site_fract_z
 _atom_site_U_iso_or_equiv
 _atom_site_adp_type
 _atom_site_occupancy
 _atom_site_site_symmetry_order  
 _atom_site_calc_flag
 _atom_site_refinement_flags_posn
 _atom_site_refinement_flags_adp
 _atom_site_refinement_flags_occupancy
 _atom_site_disorder_assembly
 _atom_site_disorder_group
Cu1 Cu 0.87312(2) 0.04288(3) 0.63424(5) 0.0266(2) Uani 1 1 d . . . . .
Cu2 Cu 0.87662(2) -0.45791(3) 0.59337(5) 0.0294(2) Uani 1 1 d . . . . .
O1 O 0.87746(9) -0.0418(2) 0.5651(3) 0.0375(11) Uani 1 1 d . . . . .
O2 O 0.89512(12) -0.0055(2) 0.4432(3) 0.0535(13) Uani 1 1 d . . . . .
O3 O 0.86661(9) 0.1293(2) 0.6975(3) 0.0338(10) Uani 1 1 d . . . . .
O4 O 0.87510(12) 0.2036(2) 0.5891(3) 0.0566(14) Uani 1 1 d . . . . .
O5 O 0.87916(9) -0.3687(2) 0.5362(3) 0.0379(11) Uani 1 1 d . . . . .
O6 O 0.86512(11) -0.2909(2) 0.6324(3) 0.0501(13) Uani 1 1 d . . . . .
O7 O 0.81317(11) 0.2865(2) 0.8963(3) 0.0475(12) Uani 1 1 d . . . . .
O10 O 0.93645(11) -0.2298(2) 0.3385(3) 0.0505(13) Uani 1 1 d . . . . .
O12 O 0.87481(10) 0.4536(2) 0.6552(3) 0.0410(11) Uani 1 1 d . . . . .
O13 O 0.85759(14) 0.4965(2) 0.7739(4) 0.0668(16) Uani 1 1 d . . . . .
N1 N 0.82733(10) 0.0307(2) 0.5920(3) 0.0308(12) Uani 1 1 d . . . . .
N2 N 0.91947(11) 0.0484(3) 0.6736(4) 0.0387(13) Uani 1 1 d . . . . .
N3 N 0.66842(11) -0.0311(2) 0.4621(4) 0.0351(12) Uani 1 1 d . . . . .
N4 N 0.7751(3) 0.0755(4) 0.7862(6) 0.095(3) Uani 1 1 d . . . . .
N5 N 0.7654(2) -0.2889(4) 0.8793(6) 0.093(3) Uani 1 1 d . . . . .
C1 C 0.80726(14) 0.0839(3) 0.5717(4) 0.0370(15) Uani 1 1 d . . . . .
H1 H 0.814721 0.129476 0.572378 0.044 Uiso 1 1 calc R U . . .
C2 C 0.77611(13) 0.0736(3) 0.5500(5) 0.0382(16) Uani 1 1 d . . . . .
H2 H 0.763073 0.112009 0.537054 0.046 Uiso 1 1 calc R U . . .
C3 C 0.76413(13) 0.0065(3) 0.5474(4) 0.0331(14) Uani 1 1 d . . . . .
C4 C 0.78507(13) -0.0473(3) 0.5697(5) 0.0419(17) Uani 1 1 d . . . . .
H4 H 0.778271 -0.093450 0.569624 0.050 Uiso 1 1 calc R U . . .
C5 C 0.81557(14) -0.0336(3) 0.5919(5) 0.0432(17) Uani 1 1 d . . . . .
H5 H 0.828922 -0.071129 0.607742 0.052 Uiso 1 1 calc R U . . .
C6 C 0.73105(13) -0.0073(3) 0.5198(4) 0.0340(15) Uani 1 1 d . . . . .
C7 C 0.70978(14) 0.0445(3) 0.5269(5) 0.0472(18) Uani 1 1 d . . . . .
H7 H 0.716265 0.087931 0.552531 0.057 Uiso 1 1 calc R U . . .
C8 C 0.67915(14) 0.0312(3) 0.4959(5) 0.0493(19) Uani 1 1 d . . . . .
H8 H 0.665322 0.067139 0.498499 0.059 Uiso 1 1 calc R U . . .
C9 C 0.68859(13) -0.0821(3) 0.4588(5) 0.0376(15) Uani 1 1 d . . . . .
H9 H 0.681488 -0.126219 0.437276 0.045 Uiso 1 1 calc R U . . .
C10 C 0.71966(14) -0.0713(3) 0.4865(5) 0.0418(17) Uani 1 1 d . . . . .
H10 H 0.733037 -0.107930 0.482431 0.050 Uiso 1 1 calc R U . . .
C11 C 0.88818(13) -0.0523(3) 0.4938(4) 0.0280(14) Uani 1 1 d . . . . .
C12 C 0.86695(13) 0.1906(3) 0.6625(4) 0.0314(14) Uani 1 1 d . . . . .
C13 C 0.89374(12) -0.1282(3) 0.4752(4) 0.0265(13) Uani 1 1 d . . . . .
C14 C 0.88282(13) -0.1795(3) 0.5255(4) 0.0291(14) Uani 1 1 d . . . . .
H14 H 0.871603 -0.166918 0.569357 0.035 Uiso 1 1 calc R U . . .
C15 C 0.91081(14) -0.1470(3) 0.4107(4) 0.0333(14) Uani 1 1 d . . . . .
H15 H 0.917673 -0.112669 0.375205 0.040 Uiso 1 1 calc R U . . .
C16 C 0.91764(14) -0.2170(3) 0.3993(4) 0.0342(15) Uani 1 1 d . . . . .
C17 C 0.90591(13) -0.2684(3) 0.4467(4) 0.0303(14) Uani 1 1 d . . . . .
H17 H 0.909545 -0.315479 0.436035 0.036 Uiso 1 1 calc R U . . .
C18 C 0.88849(13) -0.2499(3) 0.5111(4) 0.0289(14) Uani 1 1 d . . . . .
C19 C 0.84003(13) 0.2365(3) 0.7843(4) 0.0290(14) Uani 1 1 d . . . . .
H19 H 0.835369 0.190672 0.798219 0.035 Uiso 1 1 calc R U . . .
C20 C 0.86408(13) 0.3177(3) 0.6982(4) 0.0322(14) Uani 1 1 d . . . . .
H20 H 0.875008 0.326382 0.652273 0.039 Uiso 1 1 calc R U . . .
C21 C 0.85554(14) 0.3731(3) 0.7475(4) 0.0315(14) Uani 1 1 d . . . . .
C22 C 0.83861(14) 0.3600(3) 0.8143(4) 0.0346(15) Uani 1 1 d . . . . .
H22 H 0.832693 0.396968 0.847822 0.042 Uiso 1 1 calc R U . . .
C23 C 0.83059(13) 0.2923(3) 0.8310(4) 0.0312(14) Uani 1 1 d . . . . .
C27 C 0.79975(16) 0.2198(3) 0.9079(5) 0.0475(19) Uani 1 1 d . . . . .
H27A H 0.814634 0.188869 0.945587 0.057 Uiso 1 1 calc R U . . .
H27B H 0.792166 0.197696 0.847976 0.057 Uiso 1 1 calc R U . . .
C28 C 0.77388(15) 0.2346(3) 0.9558(5) 0.0388(16) Uani 1 1 d . . . . .
C29 C 0.74449(16) 0.2431(3) 0.9051(5) 0.0415(17) Uani 1 1 d . . . . .
H29 H 0.740528 0.238766 0.840679 0.050 Uiso 1 1 calc R U . . .
C30 C 0.77905(16) 0.2420(3) 1.0516(5) 0.0441(17) Uani 1 1 d . . . . .
H30 H 0.798739 0.236822 1.087166 0.053 Uiso 1 1 calc R U . . .
C31 C 0.87638(13) -0.3062(3) 0.5653(4) 0.0323(14) Uani 1 1 d . . . . .
C32 C 0.9474(2) -0.2994(4) 0.3358(7) 0.079(3) Uani 1 1 d . . . . .
H32A H 0.931358 -0.329348 0.301604 0.095 Uiso 1 1 calc R U . . .
H32B H 0.953708 -0.317690 0.398524 0.095 Uiso 1 1 calc R U . . .
C33 C 0.9745(2) -0.2987(3) 0.2882(8) 0.065(3) Uani 1 1 d . . . . .
C34 C 0.9707(2) -0.2982(4) 0.1955(7) 0.071(3) Uani 1 1 d . . . . .
H34 H 0.951265 -0.297611 0.157596 0.085 Uiso 1 1 calc R U . . .
C35 C 1.0037(2) -0.2984(4) 0.3435(7) 0.074(3) Uani 1 1 d . . . . .
H35 H 1.006179 -0.298463 0.407873 0.088 Uiso 1 1 calc R U . . .
C41 C 0.7994(3) 0.0350(5) 0.8125(7) 0.093(3) Uani 1 1 d . . . . .
H41 H 0.818449 0.056471 0.821751 0.111 Uiso 1 1 calc R U . . .
C42 C 0.7478(3) 0.0436(5) 0.7735(7) 0.087(3) Uani 1 1 d . . . . .
H42 H 0.730227 0.070609 0.756129 0.104 Uiso 1 1 calc R U . . .
C43 C 0.7449(2) -0.0286(5) 0.7854(6) 0.074(3) Uani 1 1 d . . . . .
H43 H 0.725675 -0.049096 0.774234 0.089 Uiso 1 1 calc R U . . .
C44 C 0.7987(2) -0.0372(4) 0.8273(6) 0.069(2) Uani 1 1 d . . . . .
H44 H 0.816623 -0.062803 0.845747 0.083 Uiso 1 1 calc R U . . .
C45 C 0.77061(19) -0.0694(4) 0.8138(5) 0.054(2) Uani 1 1 d . . . . .
C47 C 0.96712(15) 0.1086(3) 0.7033(6) 0.054(2) Uani 1 1 d . . . . .
H47 H 0.977522 0.150725 0.701939 0.065 Uiso 1 1 calc R U . . .
C46 C 0.76854(19) -0.1460(4) 0.8328(5) 0.055(2) Uani 1 1 d . . . . .
C48 C 0.98311(14) 0.0484(3) 0.7337(6) 0.0494(19) Uani 1 1 d . . . . .
C24 C 0.7932(2) -0.1886(4) 0.8451(8) 0.090(3) Uani 1 1 d . . . . .
H3 H 0.811977 -0.170741 0.838650 0.108 Uiso 1 1 calc R U . . .
C25 C 0.7906(3) -0.2595(5) 0.8675(9) 0.110(4) Uani 1 1 d . . . . .
H48 H 0.807979 -0.287473 0.874474 0.132 Uiso 1 1 calc R U . . .
C49 C 0.7418(2) -0.2492(5) 0.8634(7) 0.087(3) Uani 1 1 d . . . . .
H49 H 0.723280 -0.269839 0.866410 0.104 Uiso 1 1 calc R U . . .
C50 C 0.7413(2) -0.1772(5) 0.8418(6) 0.077(3) Uani 1 1 d . . . . .
H50 H 0.723338 -0.151302 0.833896 0.092 Uiso 1 1 calc R U . . .
C51 C 0.85654(12) 0.2493(3) 0.7163(4) 0.0283(13) Uani 1 1 d . . . . .
C52 C 0.86308(15) 0.4477(3) 0.7262(5) 0.0363(15) Uani 1 1 d . . . . .
C26 C 0.93595(14) 0.1070(3) 0.6751(5) 0.0456(18) Uani 1 1 d . . . . .
H26 H 0.925765 0.148755 0.655995 0.055 Uiso 1 1 calc R U . . .
C53 C 0.96589(15) -0.0129(4) 0.7314(6) 0.062(2) Uani 1 1 d . . . . .
H53 H 0.975609 -0.055187 0.750408 0.075 Uiso 1 1 calc R U . . .
C54 C 0.93481(15) -0.0113(3) 0.7014(6) 0.053(2) Uani 1 1 d . . . . .
H54 H 0.923898 -0.052889 0.700272 0.064 Uiso 1 1 calc R U . . .
N7 N 0.9184(7) -0.4517(6) 0.673(2) 0.047(6) Uani 0.5 1 d . . P A -1
C36 C 0.9308(3) -0.4000(8) 0.7261(15) 0.079(3) Uani 0.5 1 d . . P A -1
H36 H 0.918400 -0.362528 0.734577 0.095 Uiso 0.5 1 calc R U P A -1
C37 C 0.9619(3) -0.3973(8) 0.7711(15) 0.079(3) Uani 0.5 1 d . . P A -1
H37 H 0.969854 -0.357907 0.805076 0.095 Uiso 0.5 1 calc R U P A -1
C38 C 0.9802(4) -0.4544(9) 0.7637(15) 0.061(5) Uani 0.5 1 d . . P A -1
C55 C 1.0300(5) -0.5139(11) 0.8217(16) 0.079(3) Uani 0.5 1 d . . P A -1
H55 H 1.020516 -0.556679 0.826798 0.095 Uiso 0.5 1 calc R U P A -1
C56 C 1.0637(8) -0.5059(16) 0.836(3) 0.079(3) Uani 0.5 1 d . . P A -1
H56 H 1.075201 -0.544584 0.826141 0.095 Uiso 0.5 1 calc R U P A -1
N6 N 1.0766(7) -0.4525(6) 0.860(2) 0.047(6) Uani 0.5 1 d . . P A -1
C57 C 1.0612(3) -0.3930(8) 0.8467(16) 0.079(3) Uani 0.5 1 d . . P A -1
H57 H 1.071756 -0.350931 0.858678 0.095 Uiso 0.5 1 calc R U P A -1
C58 C 1.0306(3) -0.3911(8) 0.8162(15) 0.079(3) Uani 0.5 1 d . . P A -1
H58 H 1.020609 -0.348130 0.806285 0.095 Uiso 0.5 1 calc R U P A -1
C59 C 1.0142(4) -0.4522(9) 0.7999(16) 0.065(6) Uani 0.5 1 d . . P A -1
C39 C 0.9670(5) -0.5114(11) 0.7128(17) 0.079(3) Uani 0.5 1 d . . P A -1
H39 H 0.978551 -0.552343 0.716694 0.095 Uiso 0.5 1 calc R U P A -1
C40 C 0.9388(8) -0.5126(17) 0.658(4) 0.079(3) Uani 0.5 1 d . . P A -1
H40 H 0.932346 -0.547495 0.613589 0.095 Uiso 0.5 1 calc R U P A -1
O1W O 0.8749(2) 0.1344(3) 0.4313(4) 0.121(3) Uani 1 1 d . . . . .
O2W O 0.8672(3) -0.1697(4) 0.7496(5) 0.196(6) Uani 1 1 d . . . . .
O3W O 0.8505(2) -0.6411(3) 0.2848(5) 0.135(4) Uani 1 1 d . . . . .
C60 C 0.9611(6) -0.0918(14) 0.9623(18) 0.118(8) Uiso 0.5 1 d . . P B 2
O5W O 0.88904(12) -0.5161(3) 0.4658(4) 0.0634(14) Uani 1 1 d . . . . .
O6W O 0.8819(3) -0.6700(5) 0.4659(7) 0.196(5) Uani 1 1 d . . . . .
O7W O 0.87147(11) -0.0253(2) 0.7580(3) 0.0501(12) Uani 1 1 d . . . . .
O14 O 1.0132(7) -0.1434(18) 0.944(2) 0.237(12) Uiso 0.5 1 d D . P C 1
O8WB O 0.9730(7) -0.2368(15) 0.899(2) 0.217(11) Uiso 0.5 1 d . . P D 2
O60 O 1.0279(4) -0.0131(11) 1.0136(13) 0.144(6) Uiso 0.5 1 d . . P E 1
C61 C 1.0062(12) -0.205(2) 0.897(3) 0.25(2) Uiso 0.5 1 d D . P C 1
O8 O 0.9885(5) -0.1044(11) 0.9651(14) 0.150(7) Uiso 0.5 1 d . . P B 2
C62 C 1.0004(6) -0.0292(12) 0.9784(18) 0.109(8) Uiso 0.5 1 d . . P E 1
O9W O 0.9857(7) -0.5334(17) 0.990(3) 0.279(16) Uiso 0.5 1 d . . P F -1
C63 C 0.9551(6) -0.1775(18) 0.918(2) 0.178(13) Uiso 0.5 1 d . . P D 2
H1O1 H 0.875244 0.166281 0.478090 0.266 Uiso 1 1 d R U . . .
H2O1 H 0.885944 0.090841 0.443380 0.266 Uiso 1 1 d R U . . .
H1O7 H 0.870524 -0.076469 0.742560 0.266 Uiso 1 1 d R U . . .
H1O5 H 0.879374 -0.499019 0.402560 0.266 Uiso 1 1 d R U . . .
H2O5 H 0.890164 -0.566669 0.468710 0.266 Uiso 1 1 d R U . . .
H2O7 H 0.873584 -0.006459 0.816910 0.266 Uiso 1 1 d R U . . .
H1O3 H 0.853654 -0.669509 0.231460 0.266 Uiso 1 1 d R U . . .
H2O3 H 0.852104 -0.587479 0.276440 0.266 Uiso 1 1 d R U . . .
H1O6 H 0.865144 -0.671839 0.409180 0.266 Uiso 1 1 d R U . . .
H2O6 H 0.881594 -0.716579 0.496940 0.266 Uiso 1 1 d R U . . .
H2O2 H 0.866514 -0.173099 0.813700 0.266 Uiso 1 1 d R U . . .
H1O2 H 0.871804 -0.210399 0.718650 0.266 Uiso 1 1 d R U . . .
 
loop_
 _atom_site_aniso_label
 _atom_site_aniso_U_11
 _atom_site_aniso_U_22
 _atom_site_aniso_U_33
 _atom_site_aniso_U_23
 _atom_site_aniso_U_13
 _atom_site_aniso_U_12
Cu1 0.0196(4) 0.0236(4) 0.0371(5) -0.0066(3) 0.0073(3) 0.0001(3)
Cu2 0.0204(4) 0.0235(4) 0.0423(5) 0.0064(3) 0.0023(3) -0.0034(3)
O1 0.036(2) 0.027(2) 0.056(3) -0.011(2) 0.023(2) -0.0009(18)
O2 0.093(4) 0.029(2) 0.041(3) 0.000(2) 0.019(3) 0.002(2)
O3 0.029(2) 0.028(2) 0.045(3) -0.0108(19) 0.008(2) 0.0010(18)
O4 0.078(4) 0.053(3) 0.050(3) -0.005(2) 0.037(3) 0.013(3)
O5 0.042(3) 0.025(2) 0.050(3) 0.002(2) 0.019(2) -0.0046(19)
O6 0.072(3) 0.039(3) 0.051(3) -0.004(2) 0.039(3) -0.010(2)
O7 0.057(3) 0.033(2) 0.065(3) -0.013(2) 0.041(3) -0.012(2)
O10 0.068(3) 0.026(2) 0.076(3) 0.004(2) 0.058(3) 0.004(2)
O12 0.043(3) 0.031(2) 0.050(3) 0.015(2) 0.013(2) -0.001(2)
O13 0.117(5) 0.023(3) 0.069(4) -0.006(2) 0.038(3) -0.005(3)
N1 0.022(3) 0.028(3) 0.041(3) -0.009(2) 0.005(2) -0.002(2)
N2 0.023(3) 0.034(3) 0.057(4) -0.007(3) 0.006(3) 0.001(2)
N3 0.027(3) 0.032(3) 0.046(3) -0.002(2) 0.006(2) -0.004(2)
N4 0.163(10) 0.052(5) 0.069(6) 0.004(4) 0.021(6) -0.001(6)
N5 0.078(6) 0.064(5) 0.126(7) 0.025(5) -0.001(5) -0.013(5)
C1 0.032(4) 0.023(3) 0.053(4) -0.006(3) 0.003(3) -0.002(3)
C2 0.026(3) 0.028(3) 0.057(4) -0.001(3) -0.001(3) 0.004(3)
C3 0.023(3) 0.032(3) 0.045(4) -0.004(3) 0.008(3) -0.001(3)
C4 0.024(3) 0.028(3) 0.070(5) -0.004(3) 0.003(3) -0.005(3)
C5 0.029(4) 0.031(4) 0.068(5) -0.008(3) 0.008(3) 0.003(3)
C6 0.023(3) 0.032(3) 0.047(4) -0.003(3) 0.008(3) -0.001(3)
C7 0.030(4) 0.033(4) 0.072(5) -0.013(3) -0.004(3) 0.001(3)
C8 0.027(4) 0.039(4) 0.078(6) -0.015(4) 0.002(4) -0.001(3)
C9 0.029(3) 0.028(3) 0.055(4) -0.002(3) 0.006(3) -0.003(3)
C10 0.027(4) 0.033(4) 0.064(5) -0.008(3) 0.008(3) 0.001(3)
C11 0.022(3) 0.026(3) 0.035(4) -0.004(3) 0.004(3) -0.003(2)
C12 0.026(3) 0.033(4) 0.036(4) -0.009(3) 0.007(3) 0.002(3)
C13 0.026(3) 0.023(3) 0.031(3) -0.004(2) 0.008(3) -0.003(2)
C14 0.026(3) 0.031(3) 0.033(4) -0.004(3) 0.012(3) 0.001(3)
C15 0.036(4) 0.029(3) 0.039(4) -0.001(3) 0.014(3) -0.005(3)
C16 0.035(4) 0.032(3) 0.041(4) -0.005(3) 0.020(3) -0.001(3)
C17 0.035(4) 0.022(3) 0.039(4) -0.003(3) 0.020(3) -0.001(3)
C18 0.029(3) 0.022(3) 0.036(4) 0.003(3) 0.007(3) -0.003(2)
C19 0.026(3) 0.024(3) 0.040(4) 0.001(3) 0.014(3) 0.000(2)
C20 0.032(3) 0.033(3) 0.033(4) 0.000(3) 0.012(3) -0.002(3)
C21 0.038(4) 0.023(3) 0.035(4) 0.002(3) 0.010(3) 0.001(3)
C22 0.037(4) 0.027(3) 0.042(4) -0.003(3) 0.013(3) 0.002(3)
C23 0.031(3) 0.032(3) 0.036(4) -0.004(3) 0.020(3) -0.001(3)
C27 0.050(4) 0.036(4) 0.070(5) -0.005(3) 0.041(4) -0.009(3)
C28 0.047(4) 0.026(3) 0.053(5) 0.001(3) 0.033(4) -0.006(3)
C29 0.055(5) 0.039(4) 0.036(4) 0.000(3) 0.022(4) -0.006(3)
C30 0.045(4) 0.034(4) 0.058(5) 0.001(3) 0.019(4) -0.002(3)
C31 0.027(3) 0.032(3) 0.039(4) -0.004(3) 0.009(3) -0.003(3)
C32 0.092(7) 0.031(4) 0.145(9) 0.001(5) 0.095(7) 0.005(4)
C33 0.081(7) 0.026(4) 0.111(8) -0.001(4) 0.070(6) 0.004(4)
C34 0.080(6) 0.056(5) 0.096(7) 0.000(5) 0.063(6) 0.002(4)
C35 0.099(8) 0.053(5) 0.089(7) -0.003(5) 0.064(7) 0.002(5)
C41 0.127(10) 0.060(6) 0.093(8) -0.006(5) 0.028(7) -0.032(6)
C42 0.118(9) 0.069(7) 0.067(7) 0.007(5) 0.005(6) 0.012(6)
C43 0.098(7) 0.061(6) 0.062(6) 0.002(4) 0.016(5) -0.003(5)
C44 0.084(6) 0.048(5) 0.078(6) -0.002(4) 0.023(5) -0.018(4)
C45 0.076(6) 0.044(4) 0.046(5) -0.002(3) 0.019(4) -0.003(4)
C47 0.031(4) 0.033(4) 0.096(6) 0.000(4) 0.009(4) 0.001(3)
C46 0.067(5) 0.044(4) 0.056(5) -0.002(4) 0.016(4) -0.012(4)
C48 0.023(3) 0.034(4) 0.088(6) -0.003(4) 0.004(4) 0.001(3)
C24 0.065(6) 0.051(5) 0.156(10) 0.017(6) 0.032(6) -0.005(5)
C25 0.086(8) 0.061(6) 0.191(13) 0.027(7) 0.049(8) 0.014(6)
C49 0.069(7) 0.074(7) 0.112(8) 0.027(6) 0.010(6) -0.028(5)
C50 0.075(6) 0.066(6) 0.081(7) 0.018(5) 0.001(5) -0.008(5)
C51 0.021(3) 0.028(3) 0.035(4) -0.005(3) 0.004(3) 0.001(2)
C52 0.041(4) 0.028(3) 0.039(4) 0.007(3) 0.006(3) -0.003(3)
C26 0.025(3) 0.028(3) 0.083(5) -0.001(3) 0.010(3) 0.003(3)
C53 0.031(4) 0.031(4) 0.119(7) 0.009(4) 0.003(4) 0.009(3)
C54 0.032(4) 0.029(4) 0.094(6) 0.004(4) 0.003(4) -0.002(3)
N7 0.013(9) 0.031(3) 0.10(2) -0.010(5) 0.010(8) -0.007(4)
C36 0.033(3) 0.042(3) 0.146(7) -0.027(4) -0.013(4) 0.007(3)
C37 0.033(3) 0.042(3) 0.146(7) -0.027(4) -0.013(4) 0.007(3)
C38 0.047(11) 0.042(9) 0.084(15) -0.009(10) -0.005(11) 0.005(7)
C55 0.033(3) 0.042(3) 0.146(7) -0.027(4) -0.013(4) 0.007(3)
C56 0.033(3) 0.042(3) 0.146(7) -0.027(4) -0.013(4) 0.007(3)
N6 0.013(9) 0.031(3) 0.10(2) -0.010(5) 0.010(8) -0.007(4)
C57 0.033(3) 0.042(3) 0.146(7) -0.027(4) -0.013(4) 0.007(3)
C58 0.033(3) 0.042(3) 0.146(7) -0.027(4) -0.013(4) 0.007(3)
C59 0.026(8) 0.047(9) 0.108(17) -0.026(12) -0.016(11) 0.009(7)
C39 0.033(3) 0.042(3) 0.146(7) -0.027(4) -0.013(4) 0.007(3)
C40 0.033(3) 0.042(3) 0.146(7) -0.027(4) -0.013(4) 0.007(3)
O1W 0.244(10) 0.061(4) 0.058(4) -0.003(3) 0.032(5) 0.052(5)
O2W 0.480(19) 0.052(4) 0.077(5) -0.005(4) 0.106(8) -0.013(7)
O3W 0.299(12) 0.055(4) 0.065(4) -0.004(3) 0.071(6) -0.009(5)
O5W 0.070(4) 0.058(3) 0.066(4) -0.011(3) 0.023(3) 0.012(3)
O6W 0.372(17) 0.089(6) 0.123(8) 0.007(5) 0.046(9) 0.017(8)
O7W 0.064(3) 0.046(3) 0.039(3) 0.004(2) 0.009(2) -0.007(2)
 
_geom_special_details
;
 All esds (except the esd in the dihedral angle between two l.s. planes)
 are estimated using the full covariance matrix.  The cell esds are taken
 into account individually in the estimation of esds in distances, angles
 and torsion angles; correlations between esds in cell parameters are only
 used when they are defined by crystal symmetry.  An approximate (isotropic)
 treatment of cell esds is used for estimating esds involving l.s. planes.
;
 
loop_
 _geom_bond_atom_site_label_1
 _geom_bond_atom_site_label_2
 _geom_bond_distance
 _geom_bond_site_symmetry_2
 _geom_bond_publ_flag
Cu1 O1 1.939(4) . ?
Cu1 O3 1.944(4) . ?
Cu1 N1 2.027(5) . ?
Cu1 N2 2.038(5) . ?
Cu1 O7W 2.250(4) . ?
Cu2 O5 1.910(4) . ?
Cu2 O12 1.926(4) 1_545 ?
Cu2 N7 1.99(3) . ?
Cu2 N3 2.021(5) 7_646 ?
Cu2 O5W 2.348(5) . ?
O1 C11 1.260(7) . ?
O2 C11 1.243(7) . ?
O3 C12 1.277(7) . ?
O4 C12 1.238(7) . ?
O5 C31 1.281(7) . ?
O6 C31 1.235(7) . ?
O7 C23 1.367(7) . ?
O7 C27 1.432(7) . ?
O10 C16 1.377(7) . ?
O10 C32 1.417(8) . ?
O12 C52 1.271(8) . ?
O13 C52 1.221(8) . ?
N1 C5 1.332(7) . ?
N1 C1 1.346(7) . ?
N2 C26 1.337(8) . ?
N2 C54 1.345(8) . ?
N3 C9 1.335(7) . ?
N3 C8 1.335(8) . ?
N4 C41 1.323(13) . ?
N4 C42 1.342(13) . ?
N5 C49 1.280(12) . ?
N5 C25 1.308(12) . ?
C1 C2 1.379(8) . ?
C2 C3 1.385(8) . ?
C3 C4 1.381(8) . ?
C3 C6 1.475(8) . ?
C4 C5 1.362(8) . ?
C6 C10 1.372(8) . ?
C6 C7 1.391(8) . ?
C7 C8 1.375(9) . ?
C9 C10 1.381(8) . ?
C11 C13 1.502(7) . ?
C12 C51 1.501(8) . ?
C13 C14 1.377(8) . ?
C13 C15 1.388(8) . ?
C14 C18 1.391(8) . ?
C15 C16 1.386(8) . ?
C16 C17 1.372(8) . ?
C17 C18 1.396(8) . ?
C18 C31 1.505(8) . ?
C19 C23 1.380(8) . ?
C19 C51 1.388(8) . ?
C20 C21 1.380(8) . ?
C20 C51 1.386(8) . ?
C21 C22 1.388(8) . ?
C21 C52 1.509(8) . ?
C22 C23 1.375(8) . ?
C27 C28 1.508(9) . ?
C28 C29 1.378(9) . ?
C28 C30 1.386(10) . ?
C29 C30 1.374(9) 7_657 ?
C32 C33 1.526(10) . ?
C33 C34 1.338(12) . ?
C33 C35 1.386(12) . ?
C34 C35 1.388(11) 2_755 ?
C41 C44 1.395(11) . ?
C42 C43 1.396(12) . ?
C43 C45 1.379(11) . ?
C44 C45 1.377(11) . ?
C45 C46 1.491(10) . ?
C47 C26 1.371(9) . ?
C47 C48 1.376(9) . ?
C46 C24 1.353(11) . ?
C46 C50 1.390(11) . ?
C48 C53 1.396(9) . ?
C48 C48 1.488(12) 2_756 ?
C24 C25 1.401(12) . ?
C49 C50 1.406(12) . ?
C53 C54 1.369(9) . ?
N7 C36 1.30(3) . ?
N7 C40 1.53(3) . ?
C36 C37 1.41(2) . ?
C37 C38 1.38(2) . ?
C38 C39 1.38(3) . ?
C38 C59 1.507(19) . ?
C55 C59 1.37(3) . ?
C55 C56 1.49(5) . ?
C56 N6 1.18(3) . ?
N6 C57 1.32(2) . ?
C57 C58 1.35(2) . ?
C58 C59 1.37(2) . ?
C39 C40 1.35(5) . ?
C60 O8 1.24(3) . ?
O14 C61 1.361(19) . ?
O8WB C63 1.44(4) . ?
O60 C62 1.27(3) . ?
O60 C62 1.53(3) 5_757 ?
C62 C62 1.29(5) 5_757 ?
 
loop_
 _geom_angle_atom_site_label_1
 _geom_angle_atom_site_label_2
 _geom_angle_atom_site_label_3
 _geom_angle
 _geom_angle_site_symmetry_1
 _geom_angle_site_symmetry_3
 _geom_angle_publ_flag
O1 Cu1 O3 176.44(18) . . ?
O1 Cu1 N1 87.30(17) . . ?
O3 Cu1 N1 89.87(17) . . ?
O1 Cu1 N2 88.88(18) . . ?
O3 Cu1 N2 93.97(18) . . ?
N1 Cu1 N2 176.09(19) . . ?
O1 Cu1 O7W 88.25(18) . . ?
O3 Cu1 O7W 93.84(17) . . ?
N1 Cu1 O7W 88.56(19) . . ?
N2 Cu1 O7W 90.5(2) . . ?
O5 Cu2 O12 178.0(2) . 1_545 ?
O5 Cu2 N7 94.0(5) . . ?
O12 Cu2 N7 84.4(5) 1_545 . ?
O5 Cu2 N3 93.63(19) . 7_646 ?
O12 Cu2 N3 87.72(19) 1_545 7_646 ?
N7 Cu2 N3 167.8(6) . 7_646 ?
O5 Cu2 O5W 91.21(18) . . ?
O12 Cu2 O5W 90.30(19) 1_545 . ?
N7 Cu2 O5W 98.5(6) . . ?
N3 Cu2 O5W 90.9(2) 7_646 . ?
C11 O1 Cu1 131.9(4) . . ?
C12 O3 Cu1 124.4(4) . . ?
C31 O5 Cu2 131.3(4) . . ?
C23 O7 C27 118.2(4) . . ?
C16 O10 C32 116.6(5) . . ?
C52 O12 Cu2 122.1(4) . 1_565 ?
C5 N1 C1 116.4(5) . . ?
C5 N1 Cu1 118.7(4) . . ?
C1 N1 Cu1 124.5(4) . . ?
C26 N2 C54 117.1(5) . . ?
C26 N2 Cu1 125.1(4) . . ?
C54 N2 Cu1 117.8(4) . . ?
C9 N3 C8 117.8(5) . . ?
C9 N3 Cu2 122.4(4) . 7_646 ?
C8 N3 Cu2 119.5(4) . 7_646 ?
C41 N4 C42 116.6(9) . . ?
C49 N5 C25 115.2(8) . . ?
N1 C1 C2 122.8(5) . . ?
C1 C2 C3 120.3(6) . . ?
C4 C3 C2 116.0(5) . . ?
C4 C3 C6 121.8(5) . . ?
C2 C3 C6 122.2(5) . . ?
C5 C4 C3 120.8(6) . . ?
N1 C5 C4 123.6(6) . . ?
C10 C6 C7 116.6(5) . . ?
C10 C6 C3 122.1(5) . . ?
C7 C6 C3 121.3(5) . . ?
C8 C7 C6 119.8(6) . . ?
N3 C8 C7 122.8(6) . . ?
N3 C9 C10 122.0(6) . . ?
C6 C10 C9 120.8(6) . . ?
O2 C11 O1 125.1(5) . . ?
O2 C11 C13 120.6(5) . . ?
O1 C11 C13 114.3(5) . . ?
O4 C12 O3 124.5(6) . . ?
O4 C12 C51 119.6(5) . . ?
O3 C12 C51 115.9(5) . . ?
C14 C13 C15 119.7(5) . . ?
C14 C13 C11 119.5(5) . . ?
C15 C13 C11 120.7(5) . . ?
C13 C14 C18 120.3(5) . . ?
C16 C15 C13 120.0(5) . . ?
C17 C16 O10 124.0(5) . . ?
C17 C16 C15 120.4(5) . . ?
O10 C16 C15 115.6(5) . . ?
C16 C17 C18 119.7(5) . . ?
C14 C18 C17 119.6(5) . . ?
C14 C18 C31 120.5(5) . . ?
C17 C18 C31 119.8(5) . . ?
C23 C19 C51 119.4(5) . . ?
C21 C20 C51 120.7(6) . . ?
C20 C21 C22 119.4(5) . . ?
C20 C21 C52 120.7(6) . . ?
C22 C21 C52 119.8(5) . . ?
C23 C22 C21 119.9(5) . . ?
O7 C23 C22 114.3(5) . . ?
O7 C23 C19 124.8(5) . . ?
C22 C23 C19 120.9(5) . . ?
O7 C27 C28 105.9(5) . . ?
C29 C28 C30 118.1(6) . . ?
C29 C28 C27 120.8(6) . . ?
C30 C28 C27 121.1(7) . . ?
C30 C29 C28 121.0(6) 7_657 . ?
C29 C30 C28 121.0(7) 7_657 . ?
O6 C31 O5 124.9(6) . . ?
O6 C31 C18 120.7(5) . . ?
O5 C31 C18 114.4(5) . . ?
O10 C32 C33 108.6(5) . . ?
C34 C33 C35 119.6(8) . . ?
C34 C33 C32 122.1(10) . . ?
C35 C33 C32 118.4(9) . . ?
C33 C34 C35 119.2(9) . 2_755 ?
C33 C35 C34 121.3(9) . 2_755 ?
N4 C41 C44 125.1(10) . . ?
N4 C42 C43 122.2(10) . . ?
C45 C43 C42 120.0(10) . . ?
C45 C44 C41 117.9(9) . . ?
C44 C45 C43 118.1(8) . . ?
C44 C45 C46 120.1(8) . . ?
C43 C45 C46 121.8(8) . . ?
C26 C47 C48 120.4(6) . . ?
C24 C46 C50 116.3(7) . . ?
C24 C46 C45 121.9(7) . . ?
C50 C46 C45 121.8(8) . . ?
C47 C48 C53 116.3(6) . . ?
C47 C48 C48 121.9(4) . 2_756 ?
C53 C48 C48 121.8(4) . 2_756 ?
C46 C24 C25 120.1(9) . . ?
N5 C25 C24 124.2(10) . . ?
N5 C49 C50 126.3(9) . . ?
C46 C50 C49 117.7(9) . . ?
C20 C51 C19 119.7(5) . . ?
C20 C51 C12 118.8(5) . . ?
C19 C51 C12 121.5(5) . . ?
O13 C52 O12 125.1(6) . . ?
O13 C52 C21 121.0(6) . . ?
O12 C52 C21 113.8(5) . . ?
N2 C26 C47 123.3(6) . . ?
C54 C53 C48 120.6(6) . . ?
N2 C54 C53 122.4(6) . . ?
C36 N7 C40 118(3) . . ?
C36 N7 Cu2 128.8(15) . . ?
C40 N7 Cu2 113(2) . . ?
N7 C36 C37 124.2(18) . . ?
C38 C37 C36 118.6(15) . . ?
C39 C38 C37 118.2(17) . . ?
C39 C38 C59 119.8(18) . . ?
C37 C38 C59 121.6(16) . . ?
C59 C55 C56 114(2) . . ?
N6 C56 C55 123(3) . . ?
C56 N6 C57 119(3) . . ?
N6 C57 C58 122.4(18) . . ?
C57 C58 C59 120.3(15) . . ?
C58 C59 C55 117.1(16) . . ?
C58 C59 C38 123.5(17) . . ?
C55 C59 C38 119.4(19) . . ?
C40 C39 C38 125(2) . . ?
C39 C40 N7 114(3) . . ?
C62 O60 C62 54(2) . 5_757 ?
O60 C62 C62 74(2) . 5_757 ?
O60 C62 O60 126(2) . 5_757 ?
C62 C62 O60 52.6(18) 5_757 5_757 ?
 
_refine_diff_density_max    0.916
_refine_diff_density_min   -0.384
_refine_diff_density_rms    0.105

_shelx_res_file
;
TITL try2 in C2/c
    C:\Users\ARPAN\Desktop\recif\try2.res
    created by SHELXL-2016/6 at 14:56:07 on 27-Sep-2017
CELL 0.71073 44.8511 19.0460 14.7115 90.000 102.380 90.000
ZERR 4.0000 0.0010 0.0004 0.0003 0.000 0.001 0.000
LATT 7
SYMM -X, Y, 0.5-Z
SFAC C H N O CU
UNIT 448 400 48 148 16
EADP C36 C37 C55 C56 C57 C58 C39 C40
EADP N7 N6
FREE C60 C63
DFIX 1.28 0.02 C61 O14
OMIT 4 0 0
OMIT 0 2 0
OMIT 1 1 1
OMIT -3 1 1
OMIT 0 2 2
OMIT -1 1 1
OMIT 3 1 1
OMIT 1 1 0
OMIT 5 1 3
OMIT -7 1 4
OMIT 6 0 0
OMIT 5 1 1
ACTA
FMAP 2 1 53
PLAN 50 0 0
MERG 2
SIZE 0.011 0.008 0.005
L.S. 30
WGHT    0.114300   57.760704
FVAR       0.07695   0.51232   0.63692
CU1   5    0.873115    0.042882    0.634237    11.00000    0.01962    0.02362 =
         0.03714   -0.00664    0.00728    0.00011
CU2   5    0.876617   -0.457905    0.593373    11.00000    0.02035    0.02351 =
         0.04226    0.00638    0.00226   -0.00338
O1    4    0.877464   -0.041783    0.565066    11.00000    0.03574    0.02693 =
         0.05550   -0.01077    0.02256   -0.00094
O2    4    0.895118   -0.005528    0.443156    11.00000    0.09295    0.02885 =
         0.04072    0.00027    0.01889    0.00181
O3    4    0.866609    0.129335    0.697464    11.00000    0.02881    0.02808 =
         0.04465   -0.01078    0.00846    0.00098
O4    4    0.875097    0.203634    0.589058    11.00000    0.07779    0.05295 =
         0.04964   -0.00540    0.03734    0.01251
O5    4    0.879164   -0.368713    0.536210    11.00000    0.04244    0.02534 =
         0.05013    0.00201    0.01934   -0.00465
O6    4    0.865117   -0.290916    0.632371    11.00000    0.07218    0.03895 =
         0.05087   -0.00375    0.03934   -0.01036
O7    4    0.813167    0.286503    0.896333    11.00000    0.05697    0.03311 =
         0.06485   -0.01324    0.04085   -0.01170
O10   4    0.936448   -0.229812    0.338491    11.00000    0.06848    0.02589 =
         0.07609    0.00389    0.05791    0.00407
O12   4    0.874809    0.453564    0.655169    11.00000    0.04326    0.03112 =
         0.04981    0.01482    0.01255   -0.00089
O13   4    0.857588    0.496485    0.773862    11.00000    0.11690    0.02323 =
         0.06855   -0.00626    0.03849   -0.00474
N1    3    0.827332    0.030658    0.592021    11.00000    0.02213    0.02808 =
         0.04148   -0.00892    0.00529   -0.00219
N2    3    0.919472    0.048380    0.673580    11.00000    0.02341    0.03382 =
         0.05744   -0.00685    0.00570    0.00131
N3    3    0.668423   -0.031083    0.462137    11.00000    0.02667    0.03224 =
         0.04570   -0.00168    0.00630   -0.00425
N4    3    0.775098    0.075454    0.786232    11.00000    0.16296    0.05177 =
         0.06919    0.00353    0.02069   -0.00060
N5    3    0.765377   -0.288946    0.879294    11.00000    0.07825    0.06356 =
         0.12577    0.02496   -0.00099   -0.01307
C1    1    0.807263    0.083875    0.571724    11.00000    0.03159    0.02350 =
         0.05311   -0.00558    0.00291   -0.00203
AFIX  43
H1    2    0.814721    0.129476    0.572378    11.00000   -1.20000
AFIX   0
C2    1    0.776109    0.073621    0.550001    11.00000    0.02558    0.02793 =
         0.05666   -0.00051   -0.00107    0.00352
AFIX  43
H2    2    0.763073    0.112009    0.537054    11.00000   -1.20000
AFIX   0
C3    1    0.764131    0.006451    0.547366    11.00000    0.02255    0.03191 =
         0.04521   -0.00429    0.00841   -0.00126
C4    1    0.785072   -0.047318    0.569705    11.00000    0.02439    0.02798 =
         0.07014   -0.00416    0.00281   -0.00450
AFIX  43
H4    2    0.778271   -0.093450    0.569624    11.00000   -1.20000
AFIX   0
C5    1    0.815565   -0.033580    0.591851    11.00000    0.02925    0.03134 =
         0.06806   -0.00808    0.00800    0.00286
AFIX  43
H5    2    0.828922   -0.071129    0.607742    11.00000   -1.20000
AFIX   0
C6    1    0.731048   -0.007261    0.519758    11.00000    0.02305    0.03189 =
         0.04701   -0.00275    0.00761   -0.00080
C7    1    0.709784    0.044477    0.526872    11.00000    0.03015    0.03302 =
         0.07181   -0.01332   -0.00383    0.00137
AFIX  43
H7    2    0.716265    0.087931    0.552531    11.00000   -1.20000
AFIX   0
C8    1    0.679152    0.031208    0.495867    11.00000    0.02665    0.03892 =
         0.07848   -0.01496    0.00245   -0.00056
AFIX  43
H8    2    0.665322    0.067139    0.498499    11.00000   -1.20000
AFIX   0
C9    1    0.688587   -0.082095    0.458832    11.00000    0.02863    0.02755 =
         0.05510   -0.00238    0.00556   -0.00283
AFIX  43
H9    2    0.681488   -0.126219    0.437276    11.00000   -1.20000
AFIX   0
C10   1    0.719663   -0.071314    0.486456    11.00000    0.02739    0.03309 =
         0.06393   -0.00772    0.00781    0.00060
AFIX  43
H10   2    0.733037   -0.107930    0.482431    11.00000   -1.20000
AFIX   0
C11   1    0.888178   -0.052287    0.493770    11.00000    0.02231    0.02559 =
         0.03494   -0.00368    0.00377   -0.00347
C12   1    0.866954    0.190632    0.662507    11.00000    0.02567    0.03251 =
         0.03614   -0.00869    0.00698    0.00180
C13   1    0.893736   -0.128188    0.475228    11.00000    0.02573    0.02343 =
         0.03135   -0.00364    0.00824   -0.00263
C14   1    0.882820   -0.179473    0.525538    11.00000    0.02639    0.03055 =
         0.03283   -0.00361    0.01167    0.00097
AFIX  43
H14   2    0.871603   -0.166918    0.569357    11.00000   -1.20000
AFIX   0
C15   1    0.910815   -0.147017    0.410743    11.00000    0.03562    0.02850 =
         0.03870   -0.00085    0.01428   -0.00481
AFIX  43
H15   2    0.917673   -0.112669    0.375205    11.00000   -1.20000
AFIX   0
C16   1    0.917644   -0.216985    0.399321    11.00000    0.03485    0.03250 =
         0.04067   -0.00501    0.02035   -0.00130
C17   1    0.905911   -0.268443    0.446735    11.00000    0.03536    0.02155 =
         0.03918   -0.00349    0.01972   -0.00066
AFIX  43
H17   2    0.909545   -0.315479    0.436035    11.00000   -1.20000
AFIX   0
C18   1    0.888489   -0.249932    0.511127    11.00000    0.02934    0.02158 =
         0.03579    0.00268    0.00729   -0.00256
C19   1    0.840027    0.236465    0.784263    11.00000    0.02622    0.02368 =
         0.04015    0.00058    0.01405   -0.00021
AFIX  43
H19   2    0.835369    0.190672    0.798219    11.00000   -1.20000
AFIX   0
C20   1    0.864081    0.317714    0.698156    11.00000    0.03235    0.03286 =
         0.03342    0.00034    0.01186   -0.00157
AFIX  43
H20   2    0.875008    0.326382    0.652273    11.00000   -1.20000
AFIX   0
C21   1    0.855544    0.373079    0.747509    11.00000    0.03788    0.02308 =
         0.03471    0.00222    0.01011    0.00084
C22   1    0.838609    0.359997    0.814339    11.00000    0.03683    0.02724 =
         0.04193   -0.00335    0.01331    0.00248
AFIX  43
H22   2    0.832693    0.396968    0.847822    11.00000   -1.20000
AFIX   0
C23   1    0.830589    0.292255    0.830960    11.00000    0.03144    0.03216 =
         0.03557   -0.00355    0.01964   -0.00117
C27   1    0.799746    0.219768    0.907898    11.00000    0.04987    0.03572 =
         0.06974   -0.00472    0.04125   -0.00892
AFIX  23
H27A  2    0.814634    0.188869    0.945587    11.00000   -1.20000
H27B  2    0.792166    0.197696    0.847976    11.00000   -1.20000
AFIX   0
C28   1    0.773878    0.234597    0.955784    11.00000    0.04716    0.02601 =
         0.05339    0.00128    0.03318   -0.00645
C29   1    0.744491    0.243133    0.905116    11.00000    0.05481    0.03876 =
         0.03647   -0.00024    0.02226   -0.00632
AFIX  43
H29   2    0.740528    0.238766    0.840679    11.00000   -1.20000
AFIX   0
C30   1    0.779050    0.241996    1.051626    11.00000    0.04468    0.03353 =
         0.05794    0.00090    0.01938   -0.00163
AFIX  43
H30   2    0.798739    0.236822    1.087166    11.00000   -1.20000
AFIX   0
C31   1    0.876377   -0.306193    0.565316    11.00000    0.02672    0.03189 =
         0.03893   -0.00421    0.00863   -0.00331
C32   1    0.947398   -0.299398    0.335803    11.00000    0.09238    0.03139 =
         0.14499    0.00087    0.09511    0.00470
AFIX  23
H32A  2    0.931358   -0.329348    0.301604    11.00000   -1.20000
H32B  2    0.953708   -0.317690    0.398524    11.00000   -1.20000
AFIX   0
C33   1    0.974451   -0.298668    0.288177    11.00000    0.08122    0.02622 =
         0.11090   -0.00134    0.07021    0.00398
C34   1    0.970741   -0.298150    0.195469    11.00000    0.08032    0.05602 =
         0.09563   -0.00041    0.06325    0.00164
AFIX  43
H34   2    0.951265   -0.297611    0.157596    11.00000   -1.20000
AFIX   0
C35   1    1.003672   -0.298432    0.343461    11.00000    0.09941    0.05257 =
         0.08891   -0.00328    0.06420    0.00152
AFIX  43
H35   2    1.006179   -0.298463    0.407873    11.00000   -1.20000
AFIX   0
C41   1    0.799402    0.035045    0.812471    11.00000    0.12691    0.06037 =
         0.09252   -0.00640    0.02782   -0.03239
AFIX  43
H41   2    0.818449    0.056471    0.821751    11.00000   -1.20000
AFIX   0
C42   1    0.747810    0.043630    0.773496    11.00000    0.11763    0.06950 =
         0.06712    0.00700    0.00500    0.01200
AFIX  43
H42   2    0.730227    0.070609    0.756129    11.00000   -1.20000
AFIX   0
C43   1    0.744928   -0.028558    0.785426    11.00000    0.09845    0.06098 =
         0.06200    0.00171    0.01636   -0.00265
AFIX  43
H43   2    0.725675   -0.049096    0.774234    11.00000   -1.20000
AFIX   0
C44   1    0.798687   -0.037202    0.827303    11.00000    0.08370    0.04831 =
         0.07768   -0.00183    0.02323   -0.01804
AFIX  43
H44   2    0.816623   -0.062803    0.845747    11.00000   -1.20000
AFIX   0
C45   1    0.770607   -0.069449    0.813795    11.00000    0.07603    0.04387 =
         0.04562   -0.00157    0.01950   -0.00302
C47   1    0.967117    0.108634    0.703306    11.00000    0.03053    0.03326 =
         0.09633   -0.00043    0.00860    0.00091
AFIX  43
H47   2    0.977522    0.150725    0.701939    11.00000   -1.20000
AFIX   0
C46   1    0.768539   -0.146014    0.832768    11.00000    0.06722    0.04383 =
         0.05601   -0.00186    0.01556   -0.01151
C48   1    0.983107    0.048375    0.733672    11.00000    0.02327    0.03368 =
         0.08793   -0.00275    0.00421    0.00094
C24   1    0.793240   -0.188588    0.845084    11.00000    0.06535    0.05100 =
         0.15644    0.01655    0.03202   -0.00452
AFIX  43
H3    2    0.811977   -0.170741    0.838650    11.00000   -1.20000
AFIX   0
C25   1    0.790635   -0.259520    0.867514    11.00000    0.08618    0.06137 =
         0.19135    0.02729    0.04866    0.01360
AFIX  43
H48   2    0.807979   -0.287473    0.874474    11.00000   -1.20000
AFIX   0
C49   1    0.741826   -0.249150    0.863400    11.00000    0.06946    0.07391 =
         0.11215    0.02734    0.00982   -0.02806
AFIX  43
H49   2    0.723280   -0.269839    0.866410    11.00000   -1.20000
AFIX   0
C50   1    0.741297   -0.177174    0.841829    11.00000    0.07546    0.06575 =
         0.08149    0.01826    0.00142   -0.00837
AFIX  43
H50   2    0.723338   -0.151302    0.833896    11.00000   -1.20000
AFIX   0
C51   1    0.856535    0.249346    0.716287    11.00000    0.02061    0.02777 =
         0.03527   -0.00529    0.00351    0.00060
C52   1    0.863079    0.447703    0.726172    11.00000    0.04075    0.02815 =
         0.03910    0.00722    0.00641   -0.00288
C26   1    0.935952    0.107002    0.675068    11.00000    0.02456    0.02817 =
         0.08316   -0.00073    0.00963    0.00263
AFIX  43
H26   2    0.925765    0.148755    0.655995    11.00000   -1.20000
AFIX   0
C53   1    0.965889   -0.012890    0.731401    11.00000    0.03144    0.03067 =
         0.11872    0.00935    0.00262    0.00863
AFIX  43
H53   2    0.975609   -0.055187    0.750408    11.00000   -1.20000
AFIX   0
C54   1    0.934806   -0.011254    0.701424    11.00000    0.03166    0.02853 =
         0.09440    0.00419    0.00294   -0.00195
AFIX  43
H54   2    0.923898   -0.052889    0.700272    11.00000   -1.20000
AFIX   0
PART -1
N7    3    0.918354   -0.451664    0.673464    10.50000    0.01344    0.03116 =
         0.09512   -0.00975    0.00952   -0.00717
C36   1    0.930797   -0.400042    0.726106    10.50000    0.03347    0.04226 =
         0.14647   -0.02700   -0.01278    0.00665
AFIX  43
H36   2    0.918400   -0.362528    0.734577    10.50000   -1.20000
AFIX   0
C37   1    0.961855   -0.397319    0.771119    10.50000    0.03347    0.04226 =
         0.14647   -0.02700   -0.01278    0.00665
AFIX  43
H37   2    0.969854   -0.357907    0.805076    10.50000   -1.20000
AFIX   0
C38   1    0.980152   -0.454427    0.763724    10.50000    0.04714    0.04190 =
         0.08426   -0.00902   -0.00488    0.00500
C55   1    1.030004   -0.513886    0.821661    10.50000    0.03347    0.04226 =
         0.14647   -0.02700   -0.01278    0.00665
AFIX  43
H55   2    1.020516   -0.556679    0.826798    10.50000   -1.20000
AFIX   0
C56   1    1.063697   -0.505860    0.836213    10.50000    0.03347    0.04226 =
         0.14647   -0.02700   -0.01278    0.00665
AFIX  43
H56   2    1.075201   -0.544584    0.826141    10.50000   -1.20000
AFIX   0
N6    3    1.076551   -0.452466    0.860023    10.50000    0.01344    0.03116 =
         0.09512   -0.00975    0.00952   -0.00717
C57   1    1.061151   -0.393050    0.846666    10.50000    0.03347    0.04226 =
         0.14647   -0.02700   -0.01278    0.00665
AFIX  43
H57   2    1.071756   -0.350931    0.858678    10.50000   -1.20000
AFIX   0
C58   1    1.030603   -0.391129    0.816240    10.50000    0.03347    0.04226 =
         0.14647   -0.02700   -0.01278    0.00665
AFIX  43
H58   2    1.020609   -0.348130    0.806285    10.50000   -1.20000
AFIX   0
C59   1    1.014214   -0.452157    0.799918    10.50000    0.02560    0.04687 =
         0.10813   -0.02586   -0.01578    0.00909
C39   1    0.967041   -0.511408    0.712772    10.50000    0.03347    0.04226 =
         0.14647   -0.02700   -0.01278    0.00665
AFIX  43
H39   2    0.978551   -0.552343    0.716694    10.50000   -1.20000
AFIX   0
C40   1    0.938802   -0.512563    0.657576    10.50000    0.03347    0.04226 =
         0.14647   -0.02700   -0.01278    0.00665
AFIX  43
H40   2    0.932346   -0.547495    0.613589    10.50000   -1.20000
AFIX   0
PART 0
O1W   4    0.874910    0.134409    0.431269    11.00000    0.24394    0.06133 =
         0.05832   -0.00284    0.03211    0.05166
O2W   4    0.867229   -0.169685    0.749614    11.00000    0.48014    0.05207 =
         0.07674   -0.00500    0.10622   -0.01298
O3W   4    0.850517   -0.641087    0.284811    11.00000    0.29904    0.05540 =
         0.06546   -0.00358    0.07140   -0.00885
PART 2
C60   1    0.961130   -0.091797    0.962340    10.50000    0.11813
PART 0
O5W   4    0.889036   -0.516106    0.465764    11.00000    0.06991    0.05770 =
         0.06644   -0.01097    0.02307    0.01161
O6W   4    0.881939   -0.669951    0.465868    11.00000    0.37244    0.08926 =
         0.12250    0.00663    0.04606    0.01682
O7W   4    0.871474   -0.025250    0.758012    11.00000    0.06408    0.04624 =
         0.03924    0.00359    0.00949   -0.00678
PART 1
O14   4    1.013188   -0.143430    0.944146    10.50000    0.23739
PART 2
O8WB  4    0.972962   -0.236786    0.899144    10.50000    0.21697
PART 1
O60   4    1.027873   -0.013060    1.013641    10.50000    0.14414
C61   1    1.006206   -0.204638    0.896562    10.50000    0.24720
PART 2
O8    4    0.988473   -0.104365    0.965106    10.50000    0.14990
PART 1
C62   1    1.000448   -0.029228    0.978367    10.50000    0.10934
PART -1
O9W   4    0.985675   -0.533424    0.989516    10.50000    0.27920
PART 2
C63   1    0.955114   -0.177529    0.918030    10.50000    0.17760
AFIX   3
PART 0
H1O1  2    0.875244    0.166281    0.478090    11.00000   -1.50000
H2O1  2    0.885944    0.090841    0.443380    11.00000   -1.50000
H1O7  2    0.870524   -0.076469    0.742560    11.00000   -1.50000
H1O5  2    0.879374   -0.499019    0.402560    11.00000   -1.50000
H2O5  2    0.890164   -0.566669    0.468710    11.00000   -1.50000
H2O7  2    0.873584   -0.006459    0.816910    11.00000   -1.50000
H1O3  2    0.853654   -0.669509    0.231460    11.00000   -1.50000
H2O3  2    0.852104   -0.587479    0.276440    11.00000   -1.50000
H1O6  2    0.865144   -0.671839    0.409180    11.00000   -1.50000
H2O6  2    0.881594   -0.716579    0.496940    11.00000   -1.50000
H2O2  2    0.866514   -0.173099    0.813700    11.00000   -1.50000
H1O2  2    0.871804   -0.210399    0.718650    11.00000   -1.50000
AFIX   0
HKLF 4


REM  try2 in C2/c
REM R1 =  0.0680 for    6004 Fo > 4sig(Fo)  and  0.1148 for all    9461 data
REM    747 parameters refined using      1 restraints

END

WGHT      0.1120     58.9144

REM Highest difference peak  0.916,  deepest hole -0.384,  1-sigma level  0.105
Q1    1   0.9599 -0.0512  0.9806  11.00000  0.05    0.92
Q2    1   1.0200 -0.0455  1.0444  11.00000  0.05    0.91
Q3    1   0.9849 -0.4068  0.9174  11.00000  0.05    0.77
Q4    1   0.9596 -0.5116  0.9365  11.00000  0.05    0.75
Q5    1   0.9610 -0.1211  0.9279  11.00000  0.05    0.73
Q6    1   1.0158 -0.0911  1.0227  11.00000  0.05    0.71
Q7    1   0.9616 -0.4392  0.9067  11.00000  0.05    0.68
Q8    1   1.0191 -0.2863  0.8797  11.00000  0.05    0.67
Q9    1   0.9940 -0.1945  0.8133  11.00000  0.05    0.66
Q10   1   1.0021 -0.0817  0.9582  11.00000  0.05    0.63
Q11   1   1.0185 -0.2235  0.8452  11.00000  0.05    0.62
Q12   1   0.8827 -0.6382  0.2916  11.00000  0.05    0.62
Q13   1   0.9787 -0.1285  1.0076  11.00000  0.05    0.61
Q14   1   0.9617 -0.2867  0.8606  11.00000  0.05    0.58
Q15   1   0.9847 -0.5783  1.0376  11.00000  0.05    0.57
Q16   1   0.9862 -0.4826  0.9943  11.00000  0.05    0.56
Q17   1   0.9339 -0.6431  0.4742  11.00000  0.05    0.55
Q18   1   0.9878 -0.3190  0.8824  11.00000  0.05    0.52
Q19   1   1.0019 -0.0074  0.9855  11.00000  0.05    0.48
Q20   1   0.9986 -0.2213  0.9255  11.00000  0.05    0.42
Q21   1   0.9014 -0.6448  0.4022  11.00000  0.05    0.38
Q22   1   0.8222 -0.0452  0.5630  11.00000  0.05    0.34
Q23   1   0.9006 -0.1778  0.7649  11.00000  0.05    0.33
Q24   1   0.9422 -0.1903  0.7213  11.00000  0.05    0.33
Q25   1   0.8789  0.4914  0.6463  11.00000  0.05    0.31
Q26   1   0.8797 -0.2193  0.5078  11.00000  0.05    0.29
Q27   1   0.7772 -0.0569  0.7866  11.00000  0.05    0.28
Q28   1   1.0833 -0.5584  0.8736  11.00000  0.05    0.27
Q29   1   0.8938 -0.1871  0.5667  11.00000  0.05    0.27
Q30   1   0.8847  0.0009  0.6870  11.00000  0.05    0.27
Q31   1   0.9191 -0.7388  0.5269  11.00000  0.05    0.26
Q32   1   0.7630 -0.0843  0.8113  11.00000  0.05    0.26
Q33   1   0.8770 -0.7067  0.4011  11.00000  0.05    0.25
Q34   1   0.8771 -0.7208  0.4162  11.00000  0.05    0.25
Q35   1   0.8587  0.2698  0.7201  11.00000  0.05    0.25
Q36   1   0.9017  0.0463  0.6414  11.00000  0.05    0.25
Q37   1   0.7146  0.0606  0.7383  11.00000  0.05    0.24
Q38   1   0.8610 -0.1602  0.5099  11.00000  0.05    0.23
Q39   1   0.7412 -0.0588  0.7387  11.00000  0.05    0.23
Q40   1   0.8731 -0.7228  0.4546  11.00000  0.05    0.23
Q41   1   0.8995  0.2612  0.6228  11.00000  0.05    0.23
Q42   1   0.8946  0.4546  0.6865  11.00000  0.05    0.23
Q43   1   0.9645 -0.2854  0.2933  11.00000  0.05    0.23
Q44   1   0.7431  0.0041  0.7265  11.00000  0.05    0.23
Q45   1   0.7196  0.0235  0.6877  11.00000  0.05    0.23
Q46   1   0.7762  0.0751  0.7564  11.00000  0.05    0.23
Q47   1   0.8795 -0.3362  0.5405  11.00000  0.05    0.22
Q48   1   0.9164 -0.0588  0.6787  11.00000  0.05    0.22
Q49   1   0.8806 -0.0422  0.6162  11.00000  0.05    0.22
Q50   1   0.9379 -0.3591  0.1738  11.00000  0.05    0.22
;
_shelx_res_checksum    1216

_shelx_hkl_file
;
  -4   0   0  -12.89    0.51
  -4   0   0  -12.23    0.47
   4   0   0  -11.81    0.46
   4   0   0  -11.90    0.62
   4   0   0  -12.62    0.54
   4   0   0  -12.20    0.53
   6   0   0   -1.65    1.57
   6   0   0   -3.67    1.26
   6   0   0   -3.86    1.45
  -6   0   0   -1.66    1.39
  -6   0   0   -7.21    0.80
  -6   0   0   -6.45    0.82
  -6   0   0   -4.90    1.03
   6   0   0   -6.15    0.88
   8   0   0 7811.18  321.27
   8   0   0 7766.57  321.29
  -8   0   0 7930.36  321.43
   8   0   0 7946.58  324.53
  -8   0   0 7924.95  321.41
   8   0   0 7959.52  324.59
  -8   0   0 7956.46  324.43
  -8   0   0 8236.02  327.04
  10   0   0   19.94    3.56
 -10   0   0   19.59    3.83
 -10   0   0   18.30    3.98
  10   0   0   23.23    3.97
 -10   0   0   18.74    3.53
 -10   0   0   17.99    3.90
  10   0   0   19.25    3.63
  10   0   0   20.35    3.88
 -12   0   0 4386.18  184.54
 -12   0   0 4390.81  183.17
 -12   0   0 4430.16  183.14
  12   0   0 4457.78  184.90
  12   0   0 4583.38  184.91
  12   0   0 4635.30  183.15
  12   0   0 4411.18  182.98
 -12   0   0 4544.39  184.72
  14   0   0    4.54    3.16
  14   0   0    1.30    3.50
  14   0   0   13.74    3.92
 -14   0   0   10.85    3.61
 -14   0   0    1.92    3.25
 -14   0   0    2.85    3.51
  14   0   0    9.08    3.90
 -14   0   0    4.71    3.01
  16   0   0 2363.19   98.95
 -16   0   0 2280.39   99.43
  16   0   0 2489.67  100.16
  16   0   0 2401.21   99.05
 -16   0   0 2322.55   99.57
 -16   0   0 2318.56   99.21
 -16   0   0 2401.95   99.29
  18   0   0   47.30    5.70
 -18   0   0   44.07    5.54
  18   0   0   32.79    5.02
 -18   0   0   37.93    5.11
  18   0   0   34.90    5.07
 -18   0   0   33.08    5.15
 -18   0   0   39.65    5.01
  18   0   0   38.33    5.21
  20   0   0 3705.93  147.38
  20   0   0 3642.01  145.71
 -20   0   0 3466.63  145.88
 -20   0   0 3511.98  146.02
  20   0   0 3490.32  145.45
  20   0   0 3363.27  147.10
 -20   0   0 3505.64  146.43
 -20   0   0 3345.54  146.36
  22   0   0   -3.80    4.08
 -22   0   0   -1.95    4.47
 -22   0   0   -1.22    3.99
  22   0   0    9.44    4.37
 -22   0   0   -5.64    3.47
 -22   0   0   -0.81    3.92
  22   0   0    3.55    3.64
  22   0   0   -0.99    3.90
 -24   0   0  492.53   24.98
 -24   0   0  487.36   24.96
  24   0   0  505.95   25.22
  24   0   0  516.73   25.80
  24   0   0  473.36   25.49
 -24   0   0  462.86   25.29
 -24   0   0  505.47   25.78
  24   0   0  492.91   25.06
  26   0   0    5.34    4.74
 -26   0   0   -5.36    3.95
 -26   0   0   -3.99    4.65
  26   0   0    2.78    4.23
 -26   0   0    1.57    4.46
 -26   0   0   -0.01    4.67
  26   0   0   -2.37    4.24
  26   0   0    0.36    4.77
  28   0   0  383.58   22.43
  28   0   0  388.83   21.63
  28   0   0  404.17   21.90
 -28   0   0  387.93   22.41
 -28   0   0  386.21   21.54
 -28   0   0  395.13   22.55
 -28   0   0  388.40   21.62
  28   0   0  404.44   22.58
 -30   0   0   58.28    8.28
 -30   0   0   52.50    7.69
 -30   0   0   54.11    7.59
  30   0   0   51.56    7.80
  30   0   0   41.39    7.50
  30   0   0   50.45    8.26
  30   0   0   45.23    7.50
 -30   0   0   67.02    8.63
  32   0   0  388.15   22.53
  32   0   0  368.54   22.95
 -32   0   0  371.26   21.88
  32   0   0  372.96   22.04
 -32   0   0  363.40   22.80
  32   0   0  402.53   23.36
 -32   0   0  407.96   22.36
 -32   0   0  388.08   23.22
  34   0   0   -2.40    5.68
  34   0   0   -6.42    5.57
 -34   0   0   -3.33    5.62
 -34   0   0    9.20    6.26
 -34   0   0    6.15    6.28
 -34   0   0    2.90    6.10
  34   0   0   -2.59    5.19
 -36   0   0  101.44   11.88
 -36   0   0  109.07   11.97
 -36   0   0  100.98   10.73
  36   0   0   90.46   10.76
  36   0   0  105.09   11.66
 -36   0   0  105.25   10.75
 -38   0   0   -1.48    6.01
 -38   0   0    0.41    6.32
  38   0   0    2.79    6.05
 -38   0   0   -2.18    5.93
 -38   0   0    5.50    7.06
 -40   0   0   37.30    8.45
  40   0   0   29.40    7.54
 -40   0   0   37.14    7.73
 -40   0   0   57.59    9.74
 -42   0   0    3.21    6.46
 -42   0   0    5.13    5.59
 -42   0   0    2.35    6.68
  42   0   0    4.05    5.82
  44   0   0  117.04   13.80
 -44   0   0  156.65   13.45
  46   0   0   -3.24    5.58
 -46   0   0    7.50    6.20
  48   0   0  112.46   14.22
 -48   0   0  130.36   12.79
  -1  -1   0    0.00    0.23
  -1  -1   0   -0.04    0.27
   1  -1   0   -0.27    0.26
   1   1   0    0.29    0.30
  -3  -1   0   -0.50    0.51
   3  -1   0    0.07    0.35
  -3   1   0    1.04    0.51
  -3  -1   0   -0.01    0.42
  -3  -1   0    0.33    0.58
   3   1   0   -0.35    0.61
   3  -1   0   -0.18    0.57
   3  -1   0   -0.07    0.33
  -3   1   0    0.11    0.27
  -3   1   0   -0.03    0.24
   3   1   0   -0.31    0.36
   3   1   0    0.33    0.56
  -5  -1   0    7.41    1.43
   5   1   0   19.49    1.98
   5  -1   0    7.93    1.57
   5  -1   0    1.08    1.02
   5  -1   0    8.04    1.16
  -5  -1   0   20.82    1.92
   5   1   0    1.97    1.29
   7  -1   0  263.04   12.05
  -7  -1   0  270.48   12.61
   7  -1   0  260.71   11.92
   7   1   0  259.08   12.59
  -7   1   0  263.04   12.06
   7   1   0  243.98   12.40
   7  -1   0  262.54   11.94
   7  -1   0  276.77   12.46
  -7   1   0  266.98   11.93
  -7  -1   0  261.39   12.55
   7  -1   0  277.13   12.08
  -7  -1   0  268.01   12.60
  -7   1   0  268.15   12.04
  -7   1   0  253.53   12.31
   9  -1   0  442.70   19.31
  -9  -1   0  444.26   20.02
  -9  -1   0  444.20   20.09
  -9   1   0  442.67   19.46
   9   1   0  414.07   19.82
   9   1   0  428.33   20.00
   9   1   0  432.16   20.01
  -9   1   0  429.41   19.77
   9  -1   0  449.18   19.48
   9   1   0  410.66   19.75
   9  -1   0  404.74   19.13
  -9   1   0  449.39   19.53
  -9   1   0  444.97   19.29
  -9  -1   0  453.40   20.07
   9  -1   0  436.14   19.76
   9  -1   0  412.48   19.34
  11  -1   0    5.22    2.89
 -11   1   0    4.74    3.64
 -11  -1   0   10.37    3.74
 -11   1   0   10.98    3.58
  11  -1   0    8.63    3.40
 -11  -1   0    7.56    3.42
  11   1   0   10.31    4.17
 -11  -1   0    4.42    3.62
  11  -1   0    4.09    3.55
  11  -1   0    4.15    3.25
 -11  -1   0    3.84    3.48
 -11   1   0    3.04    3.92
  11   1   0    5.61    3.83
 -11   1   0   12.33    2.99
  11   1   0   10.07    4.07
  11   1   0    8.47    3.14
  13   1   0   92.21    7.04
  13  -1   0   82.12    6.21
  13   1   0   83.12    6.72
 -13  -1   0   74.97    6.62
 -13   1   0   73.98    6.14
 -13   1   0   92.73    6.65
 -13  -1   0   87.62    6.57
  13  -1   0   80.58    6.12
  13  -1   0   76.77    6.03
  13   1   0   81.07    6.69
 -13   1   0   64.16    6.34
 -13  -1   0   73.16    6.47
 -13  -1   0   83.64    6.81
 -13   1   0   89.55    5.88
  13  -1   0   84.06    6.35
  13   1   0   74.07    6.34
 -15   1   0   26.34    4.08
  15   1   0   23.13    4.53
 -15   1   0   17.11    4.07
 -15   1   0   16.45    3.54
  15  -1   0   18.89    3.82
 -15  -1   0   21.90    4.53
  15  -1   0   14.84    4.03
 -15   1   0   23.17    4.62
  15   1   0   21.14    4.34
  15   1   0   21.47    4.33
  15  -1   0   18.37    3.92
 -15  -1   0   24.32    4.12
 -15  -1   0   19.58    4.12
 -15   1   0   27.61    3.70
  15   1   0   19.07    3.91
 -15  -1   0   24.60    4.44
  15  -1   0   21.00    3.91
 -17  -1   0    5.96    3.83
  17   1   0   -0.80    3.33
 -17   1   0   -0.64    3.46
  17  -1   0   -1.93    3.05
  17   1   0    6.08    3.78
  17  -1   0    3.18    3.69
  17   1   0    2.21    4.02
 -17  -1   0    6.09    3.76
 -17   1   0    0.23    3.75
  17  -1   0    3.77    3.32
  17   1   0    6.45    3.46
  17  -1   0    0.93    3.18
 -17   1   0   -0.21    3.11
 -17  -1   0    5.58    3.82
 -17   1   0   -0.15    3.01
  19   1   0   47.16    6.10
  19  -1   0   42.03    5.26
 -19  -1   0   57.13    6.10
  19  -1   0   45.72    5.45
 -19  -1   0   46.40    6.01
  19  -1   0   49.06    5.45
  19  -1   0   44.35    5.68
  19   1   0   41.44    5.85
  19   1   0   49.10    5.89
 -19   1   0   52.83    5.91
 -19   1   0   45.57    5.89
 -19   1   0   50.38    5.47
  19   1   0   44.06    5.82
 -19   1   0   42.48    5.68
 -19  -1   0   54.22    6.32
 -21  -1   0   10.52    4.24
 -21   1   0   17.74    4.49
 -21  -1   0   13.92    4.37
 -21   1   0   16.76    4.59
 -21   1   0    9.98    4.26
  21  -1   0    9.82    3.88
  21  -1   0   12.59    4.01
  21   1   0   20.98    4.74
  21   1   0    8.24    4.18
  21   1   0   19.49    5.15
 -21   1   0   11.92    4.57
  21  -1   0   16.53    4.40
  21   1   0   12.15    4.29
  21  -1   0   12.36    4.63
 -21  -1   0    2.15    4.14
  23  -1   0   28.33    5.20
  23  -1   0   25.80    5.07
 -23   1   0   35.66    5.68
 -23  -1   0   28.24    5.79
  23  -1   0   24.65    5.40
 -23  -1   0   39.39    6.23
 -23   1   0   20.64    4.92
 -23   1   0   28.43    5.60
  23   1   0   28.63    5.94
  23   1   0   35.34    5.92
 -23   1   0   31.65    5.53
  23   1   0   30.85    5.44
  23  -1   0   27.27    5.14
 -23  -1   0   22.44    5.04
  23   1   0   37.19    5.90
  25  -1   0    4.86    4.26
  25   1   0   -0.62    4.57
 -25   1   0   10.82    5.19
 -25   1   0    8.66    4.43
 -25  -1   0   16.01    5.17
  25  -1   0   11.45    4.51
 -25  -1   0   10.56    5.12
  25   1   0    8.48    4.51
  25  -1   0    6.81    4.35
  25   1   0    2.07    4.29
  25  -1   0   11.37    4.94
 -25   1   0    6.98    4.73
  25   1   0    3.72    4.53
 -25   1   0    6.01    4.08
 -25  -1   0    1.40    4.25
  27   1   0   14.13    5.48
 -27  -1   0   16.10    5.58
  27  -1   0   15.47    5.71
 -27  -1   0   25.19    5.99
  27  -1   0   15.21    5.09
 -27  -1   0   19.07    5.53
 -27   1   0    7.57    5.31
  27  -1   0   15.64    5.09
  27  -1   0   19.07    5.32
  27   1   0   13.70    5.42
 -27   1   0   10.01    5.02
 -27   1   0   12.18    5.44
 -27   1   0   25.59    5.50
  27   1   0    8.19    5.07
  27   1   0   23.15    6.24
 -27  -1   0   12.94    5.64
 -29   1   0   12.25    5.69
 -29  -1   0   12.53    5.78
  29  -1   0    7.24    5.79
  29  -1   0   14.46    5.77
 -29  -1   0    8.44    5.52
 -29  -1   0   16.13    6.14
  29  -1   0   18.43    5.55
 -29   1   0   10.56    5.62
 -29  -1   0   21.21    5.89
 -29   1   0   14.83    5.44
  29   1   0   12.23    5.82
  29  -1   0   26.74    6.03
 -29   1   0    5.85    5.82
  29   1   0   16.15    5.63
  29   1   0    2.62    5.02
 -31   1   0   66.73    7.98
  31  -1   0   65.91    8.85
 -31  -1   0   59.97    8.72
  31   1   0   52.26    8.25
 -31   1   0   63.84    8.66
 -31   1   0   53.75    8.15
 -31  -1   0   61.35    8.31
 -31  -1   0   60.02    8.23
  31   1   0   53.09    8.24
  31   1   0   60.53    8.31
  31  -1   0   45.64    7.67
 -31  -1   0   65.58    9.07
 -31   1   0   53.79    8.28
  31  -1   0   54.18    8.06
  31  -1   0   59.81    7.90
  33  -1   0   48.73    9.19
  33   1   0   42.32    8.11
 -33  -1   0   44.92    8.37
 -33  -1   0   36.74    8.32
 -33   1   0   41.01    7.87
  33   1   0   35.81    7.64
 -33   1   0   35.39    7.22
 -33   1   0   32.02    6.98
  33   1   0   30.20    7.51
 -33  -1   0   39.32    7.43
 -33   1   0   51.04    8.35
  33  -1   0   42.39    7.83
  33  -1   0   36.92    7.32
 -33  -1   0   41.65    7.72
  35   1   0    6.95    6.14
 -35  -1   0   18.49    7.36
 -35  -1   0   15.11    6.80
 -35   1   0   16.27    7.09
 -35  -1   0   30.67    7.26
 -35   1   0   22.96    7.54
  35   1   0   12.80    6.89
  35  -1   0   15.52    6.65
 -35   1   0   29.92    7.79
  35   1   0   35.44    7.64
 -35  -1   0   16.50    7.04
 -35   1   0   20.80    6.52
 -37   1   0   16.62    6.46
  37   1   0   12.11    6.63
 -37  -1   0    1.13    5.96
 -37  -1   0   11.14    6.64
  37   1   0    1.57    6.84
 -37   1   0    4.29    6.28
 -37   1   0   27.69    7.36
 -37  -1   0   11.16    6.66
 -37   1   0   21.20    7.43
 -37  -1   0   25.80    8.04
  37   1   0    4.99    6.36
  37  -1   0   11.47    6.40
  39  -1   0   16.65    6.74
 -39   1   0   13.13    6.63
 -39  -1   0   13.09    7.04
 -39   1   0   13.97    6.89
 -39  -1   0   11.90    7.05
 -39   1   0   30.12    7.94
  39   1   0   14.06    6.53
 -39  -1   0   20.90    7.01
 -39  -1   0   32.92    7.17
 -41   1   0   43.17    8.82
 -41  -1   0   40.15    8.76
 -41   1   0   36.12    7.54
  41  -1   0   31.82    7.84
  41   1   0   32.85    7.95
 -41   1   0   42.91    8.85
 -41  -1   0   36.00    8.86
 -41  -1   0   39.40    7.61
 -43   1   0   62.19   10.03
 -43   1   0   38.10    8.74
 -43   1   0   33.59    7.66
 -43  -1   0   38.80    7.83
  43   1   0   48.07    9.37
  43  -1   0   39.64    8.66
  45  -1   0   44.32    9.26
 -45   1   0   41.75    8.12
 -45  -1   0   50.68    8.20
  45   1   0   38.93    9.43
 -47  -1   0   24.97    7.13
  47   1   0   11.76    7.75
 -47   1   0   22.72    7.47
  47  -1   0   40.63    9.37
  49  -1   0   25.47    8.68
  49   1   0   10.91    8.02
 -49  -1   0   32.58    7.51
 -49   1   0   35.78    7.87
   0   2   0   -7.90    0.37
   0  -2   0   -8.57    0.44
   0   2   0   -8.85    0.36
   0   2   0   -9.02    0.51
   0   2   0   -8.23    0.38
   0   2   0   -8.96    0.29
   0  -2   0   -7.41    0.46
   2   2   0    0.01    0.26
  -2  -2   0    0.32    0.46
   2  -2   0   -1.51    0.91
  -2  -2   0    0.67    0.83
  -2   2   0   -0.55    0.61
  -2  -2   0    0.49    0.76
   2   2   0   -1.17    0.51
   2   2   0   -1.06    0.73
  -2  -2   0   -1.57    0.58
   2   2   0    0.26    0.68
   2   2   0   -0.45    0.44
  -2  -2   0   -0.47    0.77
   4   2   0  221.45   11.75
  -4  -2   0  301.99   12.19
   6   2   0   -0.41    0.59
  -6  -2   0    1.87    1.86
   6  -2   0   -0.33    1.01
   6   2   0   -1.62    1.46
  -6  -2   0   -0.63    1.81
  -6   2   0    0.04    0.76
   6   2   0   -4.43    1.90
   6  -2   0   -0.38    1.09
  -6   2   0    0.19    0.85
   6  -2   0    1.19    1.83
  -6   2   0    3.15    1.54
  -6  -2   0   -1.03    1.82
   6  -2   0    0.62    0.89
   6  -2   0   -0.95    0.98
   6   2   0   -1.25    1.42
  -6  -2   0   -1.24    1.77
   6   2   0   -1.38    1.95
  -8   2   0  310.23   15.91
  -8  -2   0  343.04   16.28
  -8   2   0  336.26   15.08
  -8   2   0  358.03   14.73
  -8   2   0  345.72   14.65
  -8   2   0  320.59   14.97
   8  -2   0  329.42   15.97
   8  -2   0  328.72   14.74
   8  -2   0  342.34   14.99
   8  -2   0  343.09   14.81
   8   2   0  358.97   16.25
   8  -2   0  351.19   15.01
   8   2   0  335.98   16.18
  -8  -2   0  315.97   15.97
  10   2   0   39.54    5.39
 -10  -2   0   64.40    5.76
  10  -2   0   69.09    4.84
 -10  -2   0   62.86    5.71
 -10   2   0   64.25    4.90
 -10   2   0   64.43    4.46
  10   2   0   56.34    5.77
 -10   2   0   56.94    4.83
  10   2   0   65.65    5.97
 -10  -2   0   57.69    5.43
 -10   2   0   67.36    4.24
  10  -2   0   64.24    4.60
  10   2   0   62.11    5.50
 -10   2   0   55.70    5.63
  10  -2   0   67.53    4.58
  10  -2   0   60.58    6.04
  10  -2   0   69.88    4.74
  12  -2   0  664.49   29.71
  12  -2   0  701.63   31.01
  12  -2   0  673.82   29.77
 -12   2   0  677.95   30.12
 -12   2   0  725.41   29.84
 -12  -2   0  682.45   31.30
  12  -2   0  688.01   30.17
 -12   2   0  675.27   30.12
  12   2   0  702.58   31.21
  12  -2   0  701.32   30.28
  12   2   0  688.52   31.38
 -12   2   0  678.01   30.99
 -12  -2   0  730.05   31.46
 -12  -2   0  681.61   31.11
  12   2   0  661.42   31.21
  12   2   0  672.93   31.02
 -14  -2   0   83.22    7.05
  14   2   0   91.49    7.32
  14   2   0   80.52    7.25
  14  -2   0   91.91    6.52
 -14   2   0   85.74    7.01
  14   2   0  102.47    7.53
  14  -2   0   90.24    6.18
  14  -2   0   82.10    7.00
 -14  -2   0   86.72    7.24
  14   2   0   99.55    7.32
 -14   2   0   86.15    6.55
 -14   2   0   91.17    6.57
  14  -2   0   80.79    6.15
  14  -2   0   79.87    6.04
 -14   2   0   91.24    5.86
 -14  -2   0   70.58    6.56
  16  -2   0  480.66   22.28
 -16  -2   0  435.67   23.28
  16   2   0  454.40   23.55
  16  -2   0  457.95   22.15
 -16  -2   0  489.86   23.77
  16   2   0  522.21   24.07
 -16  -2   0  500.64   23.80
 -16   2   0  480.05   22.77
 -16   2   0  515.32   23.59
  16   2   0  513.76   23.89
  16  -2   0  486.02   22.76
 -16   2   0  461.82   22.62
  16   2   0  488.92   23.66
  16  -2   0  456.19   22.63
 -18   2   0   12.34    3.71
  18   2   0    3.77    3.92
 -18  -2   0   11.58    4.15
  18  -2   0    9.12    3.33
 -18  -2   0    9.68    4.08
  18   2   0   17.47    4.65
  18   2   0   12.96    4.37
 -18   2   0   10.84    4.31
 -18   2   0   13.78    3.92
  18  -2   0   17.78    3.76
 -18  -2   0    5.88    4.00
  18   2   0   14.86    3.99
  18  -2   0   19.56    3.77
  18  -2   0   17.71    4.06
 -20  -2   0 1269.58   56.89
  20   2   0 1334.16   57.41
  20  -2   0 1269.86   56.26
 -20   2   0 1295.12   56.01
  20  -2   0 1268.40   55.19
 -20  -2   0 1246.96   56.71
  20  -2   0 1330.83   56.25
  20   2   0 1275.51   56.65
 -20   2   0 1269.01   56.56
 -20  -2   0 1254.53   56.84
  20  -2   0 1251.28   55.07
 -20   2   0 1270.33   55.91
  20   2   0 1283.16   56.78
 -22   2   0   10.78    4.24
  22  -2   0   17.65    4.42
 -22  -2   0   13.92    4.80
  22   2   0    7.41    4.53
  22   2   0    8.23    4.43
  22   2   0   23.02    5.25
 -22   2   0   14.84    4.63
 -22  -2   0    9.46    4.60
 -22   2   0   15.13    4.60
  22   2   0   11.75    4.68
  22  -2   0   15.28    4.11
  22  -2   0   -1.68    3.69
  22  -2   0   16.61    4.62
 -22  -2   0   11.10    4.77
  24   2   0  223.15   15.17
 -24  -2   0  238.82   15.65
 -24  -2   0  243.83   15.22
 -24   2   0  226.16   14.54
  24  -2   0  264.26   15.14
  24   2   0  242.50   15.41
  24  -2   0  227.31   14.00
 -24   2   0  245.45   15.10
 -24   2   0  251.21   15.06
 -24  -2   0  234.45   15.47
  24   2   0  272.43   16.13
  24  -2   0  231.49   14.02
  24  -2   0  248.91   14.94
  24   2   0  242.72   15.40
 -26  -2   0   -3.41    4.01
  26   2   0    1.62    4.75
 -26   2   0   10.13    4.97
  26   2   0    1.67    4.29
 -26  -2   0    0.65    4.57
  26  -2   0    7.06    4.51
 -26  -2   0   -4.08    4.42
  26  -2   0    2.32    4.73
 -26   2   0    4.19    4.49
 -26   2   0    5.96    4.75
  26  -2   0    9.09    4.32
  26   2   0    4.71    4.93
  26  -2   0    2.22    3.98
 -28   2   0  107.57   10.28
  28  -2   0  123.65    9.67
  28  -2   0  111.10   10.34
 -28   2   0  114.55   10.35
  28   2   0  115.85   10.80
 -28  -2   0  105.04   10.68
 -28  -2   0  116.68   11.03
 -28   2   0  129.21   10.59
  28  -2   0  127.70    9.88
  28   2   0  110.01   10.69
 -28  -2   0  118.69   10.38
  28   2   0   98.42   10.25
  28  -2   0  114.26   10.12
  30  -2   0   -0.14    5.51
 -30  -2   0   -3.93    4.91
  30  -2   0    0.88    4.71
 -30   2   0    4.94    5.27
 -30   2   0   -1.89    4.94
  30   2   0   -5.55    5.36
  30  -2   0   -5.94    4.44
 -30  -2   0   -8.97    4.65
  30   2   0    0.87    5.04
 -30  -2   0   -2.31    5.58
  30  -2   0    7.86    5.04
  30   2   0   -4.05    5.19
 -30   2   0   -5.10    4.92
 -32  -2   0  144.67   11.94
 -32   2   0  137.34   12.35
  32  -2   0  159.25   11.92
 -32  -2   0  140.20   12.48
 -32  -2   0  145.19   13.25
 -32   2   0  145.77   12.60
  32  -2   0  164.45   13.05
 -32  -2   0  151.49   13.62
  32   2   0  162.78   13.73
  32   2   0  150.18   12.99
  32  -2   0  151.23   13.09
  32   2   0  151.67   13.06
 -32   2   0  144.05   12.55
 -34  -2   0    6.41    7.14
  34  -2   0   -0.52    6.34
 -34  -2   0    0.26    5.99
  34   2   0    2.87    5.97
  34   2   0   -0.41    5.90
  34  -2   0   -1.66    5.17
 -34   2   0   -0.69    5.41
 -34  -2   0  -13.09    5.50
 -34   2   0   -5.25    5.20
 -34   2   0    8.33    6.31
 -34  -2   0    1.27    5.91
  34   2   0   -4.84    5.26
 -36   2   0  212.13   16.11
  36   2   0  206.20   16.95
 -36   2   0  223.99   16.91
  36   2   0  234.25   17.29
 -36  -2   0  225.19   16.74
  36  -2   0  189.87   15.93
 -36  -2   0  209.66   15.49
 -36  -2   0  229.18   17.71
  36   2   0  231.51   16.99
 -36  -2   0  239.99   18.09
 -36   2   0  236.08   17.08
 -38   2   0   -2.25    5.58
 -38   2   0    3.22    6.04
  38  -2   0    6.26    5.79
 -38  -2   0   -3.44    6.18
 -38  -2   0   -0.58    5.80
 -38  -2   0    7.15    6.10
 -38  -2   0    6.65    6.36
 -38   2   0   -1.46    5.95
  38   2   0    0.90    5.81
  38   2   0   -4.24    5.71
 -40  -2   0   92.99   10.34
 -40  -2   0   78.74   11.65
 -40  -2   0  126.27   13.46
 -40  -2   0  114.07   11.70
 -40   2   0  110.66   12.12
 -40   2   0  114.71   12.28
 -40   2   0  132.87   12.14
  40   2   0   93.43   12.03
  40  -2   0   93.77   11.18
 -42   2   0    4.61    6.07
 -42   2   0   12.25    6.21
  42   2   0    8.32    6.47
 -42  -2   0    7.96    6.11
 -42   2   0   14.57    7.27
  42  -2   0   10.63    6.43
 -44   2   0  148.38   14.08
 -44  -2   0  164.29   13.83
 -44   2   0  193.06   16.49
  44   2   0  186.07   17.11
 -44   2   0  195.34   16.73
  44  -2   0  147.22   15.11
  46   2   0    0.28    6.53
 -46   2   0    3.81    5.90
  46  -2   0    1.58    5.90
 -46  -2   0   -0.83    5.87
  48  -2   0   87.13   12.08
 -48  -2   0   88.14   10.48
 -48   2   0   92.22   11.32
  48   2   0   86.79   12.82
  -1   3   0    3.34    0.75
  -1  -3   0   12.44    1.98
   1   3   0    5.07    1.11
   1  -3   0   10.16    1.92
  -1  -3   0    8.80    1.51
  -1  -3   0   10.13    1.51
   1   3   0    7.86    1.13
  -1   3   0    5.39    0.82
  -1  -3   0    8.48    1.54
  -1  -3   0   12.70    1.58
   1   3   0    8.01    1.32
   1   3   0   12.47    1.48
  -3  -3   0    3.79    1.69
  -3  -3   0    3.69    1.83
   3   3   0    4.09    1.84
  -3  -3   0    8.50    1.83
   3   3   0    7.58    1.76
  -3  -3   0    6.85    1.42
   3   3   0    7.81    1.73
  -3   3   0    5.81    1.58
   3   3   0    5.97    1.30
  -3  -3   0    7.33    1.73
   3  -3   0    3.39    1.93
  -5  -3   0  102.27    6.21
   5  -3   0  113.73    6.66
   5   3   0  104.44    6.46
  -5  -3   0  111.87    6.49
  -5  -3   0  106.60    5.68
  -5  -3   0   96.99    6.18
   5   3   0  107.87    6.18
   5   3   0  101.25    5.51
  -5   3   0  111.47    6.64
   5   3   0  110.21    6.42
   5   3   0  107.32    6.34
  -5  -3   0   97.18    6.20
   7  -3   0   19.30    3.81
  -7   3   0   19.21    2.26
  -7  -3   0   19.33    3.61
   7   3   0   22.47    3.82
  -7  -3   0   19.83    3.00
   7   3   0   18.75    3.51
   7   3   0   18.98    3.27
   7   3   0   14.48    3.55
  -7  -3   0   17.03    3.17
  -7  -3   0   18.04    3.50
  -7   3   0   18.55    2.12
  -7  -3   0   17.91    3.64
   7   3   0   16.92    2.87
  -7   3   0   20.95    3.71
   9   3   0   42.16    4.86
   9  -3   0   45.42    3.25
   9   3   0   47.93    5.25
   9  -3   0   45.16    3.17
  -9   3   0   41.59    3.53
   9  -3   0   44.79    5.63
  -9   3   0   43.48    3.70
   9   3   0   44.45    5.23
  -9  -3   0   45.46    5.04
  -9  -3   0   44.72    4.80
   9  -3   0   44.91    3.24
  -9   3   0   42.35    4.90
   9  -3   0   46.97    3.47
   9   3   0   39.00    4.26
  -9  -3   0   47.23    5.27
 -11  -3   0    4.07    3.71
  11  -3   0    2.17    3.97
  11   3   0    2.16    2.86
  11   3   0   -3.99    3.54
 -11   3   0    0.81    3.61
 -11   3   0   -0.54    2.60
  11  -3   0    3.54    2.56
  11  -3   0    6.73    2.33
  11   3   0   -0.36    3.00
  11   3   0    6.00    4.05
 -11   3   0    2.59    1.61
  11  -3   0    2.09    2.18
 -11  -3   0    2.38    3.57
 -11   3   0    4.49    1.63
  11  -3   0    4.35    2.32
 -11   3   0    4.79    2.39
 -11  -3   0   10.05    3.44
 -11  -3   0    6.05    3.71
 -13   3   0    7.02    1.99
  13  -3   0    8.49    2.52
 -13  -3   0    6.22    3.31
 -13   3   0    7.74    2.79
  13  -3   0    6.31    3.01
  13   3   0    8.50    3.56
  13  -3   0    8.88    2.65
  13  -3   0    8.55    2.55
  13   3   0    8.24    4.06
  13   3   0   11.66    4.09
 -13   3   0    7.32    2.98
 -13  -3   0    5.45    3.63
 -13   3   0    8.92    2.14
  13  -3   0   13.35    4.76
 -13  -3   0    4.99    3.80
 -13   3   0   13.07    4.08
  15   3   0   14.14    4.53
  15  -3   0   17.31    3.12
  15   3   0   16.08    4.31
 -15   3   0   16.12    4.40
  15  -3   0   13.84    4.49
  15  -3   0   16.13    3.12
 -15  -3   0   27.58    4.76
 -15  -3   0   13.61    3.91
 -15  -3   0   19.91    4.57
 -15   3   0   13.78    3.52
  15   3   0    7.80    4.17
 -15   3   0   10.30    3.35
 -15   3   0   18.36    2.79
  15  -3   0   11.91    3.01
  15  -3   0    8.16    3.31
  15   3   0    8.96    3.80
  17  -3   0    3.40    3.43
  17   3   0    6.55    4.08
 -17   3   0   -2.69    3.57
  17   3   0    9.57    4.25
 -17   3   0    3.64    3.14
  17   3   0    0.10    3.15
 -17  -3   0    3.80    3.79
  17  -3   0    2.69    2.82
 -17   3   0   -2.16    2.22
 -17  -3   0   -1.23    0.98
  17   3   0    2.06    4.19
 -17   3   0    4.79    3.35
  17  -3   0    4.26    2.79
 -17  -3   0    0.67    3.74
  17  -3   0    2.26    2.74
 -19   3   0   20.14    3.73
  19  -3   0   13.37    4.23
  19   3   0   13.04    4.25
 -19  -3   0    6.25    2.53
  19  -3   0   18.52    3.79
  19   3   0   20.95    4.99
 -19   3   0   19.68    5.11
 -19   3   0   19.35    3.92
 -19  -3   0   22.06    4.92
  19   3   0   24.95    5.29
  19  -3   0   26.92    3.98
 -19  -3   0   18.84    4.97
 -19   3   0   19.93    4.44
  19  -3   0   19.13    3.66
  19   3   0   11.38    4.49
 -21   3   0   10.26    3.65
 -21  -3   0   18.89    4.41
 -21  -3   0   20.90    5.22
  21  -3   0   17.86    4.08
  21   3   0   22.42    5.48
  21   3   0   14.20    4.71
 -21   3   0   19.53    4.50
  21  -3   0   16.19    4.05
  21  -3   0   19.70    4.60
 -21   3   0   16.82    5.14
 -21   3   0   21.42    4.61
  21   3   0   20.66    5.26
  21  -3   0   16.05    3.77
 -21  -3   0   11.22    4.86
  23   3   0   -3.42    4.29
 -23  -3   0    1.28    4.50
 -23  -3   0   -1.94    4.09
  23   3   0   -2.65    4.27
  23  -3   0    3.73    3.56
  23  -3   0   -2.12    3.42
 -23   3   0    4.31    3.93
  23  -3   0    4.43    3.50
 -23   3   0    6.72    4.59
 -23   3   0    4.39    3.64
  23  -3   0   -4.23    3.81
  23   3   0   -2.07    3.77
 -23  -3   0    6.25    4.37
 -23   3   0    0.33    3.93
 -25  -3   0   -4.03    3.86
 -25   3   0    0.63    4.76
  25  -3   0   -2.23    3.46
  25  -3   0   -2.60    3.39
  25   3   0   -0.12    3.80
  25   3   0    7.57    5.12
 -25   3   0    5.77    4.18
  25  -3   0   -7.85    3.35
  25   3   0    1.77    4.92
 -25   3   0   -0.73    3.72
  25  -3   0    2.13    4.57
 -25  -3   0    1.59    4.52
 -25   3   0    0.20    4.02
 -25  -3   0    7.26    5.01
 -27   3   0    8.91    4.75
 -27  -3   0   12.49    5.75
  27  -3   0    3.61    3.98
 -27  -3   0    3.86    4.73
 -27   3   0    1.09    4.35
  27  -3   0    6.04    4.10
  27  -3   0   10.37    4.59
 -27   3   0    5.95    3.77
  27   3   0   -2.91    4.80
  27   3   0   10.06    5.31
  27  -3   0   11.47    5.06
  27   3   0    2.26    4.99
 -27  -3   0   13.67    5.87
 -27   3   0    8.27    5.77
  29   3   0   19.04    6.67
 -29  -3   0    3.18    5.92
 -29  -3   0    3.51    5.46
 -29   3   0    5.49    4.12
  29  -3   0   11.68    4.99
  29   3   0   -2.71    5.63
 -29   3   0    0.53    4.49
 -29   3   0    8.49    5.80
 -29   3   0   13.19    5.51
  29  -3   0   18.99    5.83
  29   3   0    9.89    5.51
  29  -3   0    6.00    5.01
 -29  -3   0   13.38    5.95
 -31   3   0   22.12    6.97
 -31   3   0   17.75    5.99
 -31  -3   0   28.55    7.56
 -31  -3   0    4.38    5.92
 -31   3   0    8.57    5.80
 -31   3   0   27.67    5.39
  31   3   0   17.48    6.92
  31   3   0   24.00    7.01
 -31  -3   0   33.25    7.09
  31  -3   0   14.74    5.84
  31  -3   0   19.35    6.54
  31   3   0   16.36    6.74
  33  -3   0    7.04    5.54
  33   3   0   -0.09    5.94
  33  -3   0   -7.14    5.97
 -33   3   0    6.55    4.66
 -33   3   0   -0.14    5.42
 -33  -3   0   -5.38    5.22
 -33  -3   0    4.14    6.00
 -33  -3   0   -1.57    6.15
  33   3   0   -1.40    5.40
  33   3   0   -4.63    6.05
 -33   3   0    5.15    6.26
 -33   3   0   -6.67    5.17
 -35   3   0   21.65    7.04
 -35   3   0   28.41    7.35
 -35  -3   0   35.29    8.97
 -35  -3   0   13.80    7.60
  35   3   0   26.00    7.88
  35   3   0   14.99    7.36
  35  -3   0   36.46    7.28
 -35  -3   0   32.67    8.29
  35   3   0   28.64    7.60
 -35   3   0   27.83    5.97
 -35   3   0   29.51    7.61
 -35  -3   0   24.68    7.38
  37   3   0   11.43    7.05
 -37  -3   0    3.24    6.45
 -37  -3   0   -0.11    5.93
  37  -3   0   16.41    6.45
  37   3   0    0.42    6.15
 -37   3   0   13.01    6.41
 -37   3   0    0.02    6.07
 -37   3   0   17.24    6.92
 -37  -3   0   25.40    7.87
 -37  -3   0    9.95    7.58
  39   3   0   13.55    6.96
  39  -3   0   11.99    6.43
 -39  -3   0    6.86    6.42
 -39   3   0    3.62    5.88
 -39  -3   0    7.99    6.16
 -39   3   0   11.00    6.42
 -39   3   0   10.93    6.59
 -39  -3   0    7.99    6.88
 -41   3   0   -0.23    5.74
  41   3   0   -0.43    5.84
 -41   3   0    1.17    5.84
  41  -3   0    2.22    5.65
 -41   3   0    3.82    6.03
 -41  -3   0    1.66    6.07
  43   3   0    4.42    6.56
  43  -3   0   -4.76    5.13
 -43  -3   0    5.35    5.80
 -43   3   0    7.35    6.59
 -43   3   0    6.26    6.51
 -43   3   0   -4.24    6.02
 -45  -3   0   -1.13    5.81
 -45   3   0    1.87    6.89
  45   3   0    0.86    6.13
 -45   3   0   -8.27    5.64
  45  -3   0    7.35    6.19
 -45   3   0    3.34    6.28
  47   3   0    3.74    7.15
 -47   3   0    9.12    6.70
  47  -3   0    3.59    6.39
 -47  -3   0   15.56    6.29
  49  -3   0    3.10    6.16
 -49   3   0   17.40    6.98
  49   3   0   12.08    7.71
   0   4   0 5479.00  229.31
   0  -4   0 5749.75  228.01
   0   4   0 5401.13  227.90
   0  -4   0 5730.15  229.30
   0   4   0 5642.51  228.04
   0  -4   0 5505.05  226.68
   0   4   0 5697.77  225.87
   0  -4   0 5380.16  226.59
   0  -4   0 5683.42  229.07
  -2   4   0  216.50    9.46
  -2  -4   0  201.16   10.14
  -2  -4   0  209.35   10.98
  -2  -4   0  226.54   10.51
   2   4   0  226.57   10.22
   2   4   0  219.57   10.59
  -2  -4   0  213.39   10.32
   2  -4   0  219.54   11.31
   2   4   0  216.85   10.48
  -2  -4   0  221.66   10.34
  -2   4   0  210.31    9.42
  -4   4   0   -1.74    3.30
  -4  -4   0    0.79    2.42
  -4  -4   0    1.66    2.64
   4   4   0    1.10    2.71
   4   4   0   -1.09    2.90
   4  -4   0   -1.01    3.05
  -4  -4   0    1.18    2.71
   4   4   0    0.88    2.88
  -4  -4   0    2.06    2.11
   4   4   0    1.40    1.80
  -4  -4   0    0.03    2.79
   6   4   0   68.67    5.80
  -6   4   0   66.52    6.08
   6   4   0   70.57    5.45
  -6  -4   0   75.62    5.72
  -6  -4   0   78.45    5.11
   6   4   0   82.19    5.92
  -6  -4   0   73.58    5.83
  -6  -4   0   69.34    5.74
   6   4   0   70.42    4.81
   6   4   0   71.79    5.92
   6  -4   0   69.34    6.19
  -6  -4   0   73.90    6.00
  -8  -4   0  202.50   11.10
   8   4   0  175.19   10.76
   8   4   0  209.85   11.20
   8   4   0  199.10   11.31
  -8   4   0  196.35    8.84
  -8  -4   0  187.47   11.24
   8   4   0  182.25    9.79
  -8   4   0  197.63   11.39
  -8  -4   0  201.60   10.17
   8  -4   0  203.09   11.57
   8   4   0  205.43   10.99
  -8  -4   0  202.88   11.01
  -8  -4   0  206.75   11.20
 -10   4   0    4.52    2.12
  10  -4   0    4.47    1.99
 -10   4   0   11.95    3.72
  10   4   0    2.16    3.66
 -10  -4   0    3.90    3.60
  10   4   0    3.93    2.74
 -10  -4   0    5.15    3.63
 -10  -4   0    5.14    4.00
  10  -4   0    4.74    1.72
 -10  -4   0    3.31    3.25
  10   4   0    8.31    3.33
  10   4   0    1.28    3.86
  10  -4   0    6.62    4.58
  10   4   0    2.37    3.62
 -10   4   0    2.65    2.11
 -12  -4   0  103.11    8.04
  12   4   0  108.08    8.09
  12   4   0  104.97    7.86
  12  -4   0  109.88    5.61
 -12   4   0  100.16    6.19
  12  -4   0  105.47    6.01
  12  -4   0  114.81    6.22
 -12  -4   0  116.47    8.29
 -12  -4   0  107.47    7.99
 -12  -4   0   85.37    7.78
 -12   4   0  100.22    7.91
  12   4   0  121.88    8.56
  12   4   0  104.41    7.08
 -12   4   0  119.14    6.51
  12  -4   0  107.19    8.22
  12  -4   0  106.47    5.48
  14  -4   0   67.22    6.66
  14   4   0   71.70    6.62
 -14  -4   0   63.95    6.57
 -14  -4   0   74.40    6.87
  14   4   0   67.16    6.84
 -14  -4   0   64.54    6.72
  14   4   0   73.37    5.84
  14  -4   0   63.99    5.00
 -14   4   0   83.11    7.11
 -14  -4   0   75.55    6.71
  14   4   0   72.09    6.89
  14  -4   0   63.16    4.37
 -14   4   0   62.61    5.14
 -14   4   0   70.43    5.25
  14  -4   0   70.43    4.57
  14  -4   0   61.60    4.79
 -16   4   0  285.37   15.22
  16   4   0  256.00   13.59
  16  -4   0  251.52   12.94
 -16  -4   0  249.36   14.80
 -16   4   0  235.28   12.92
  16   4   0  234.90   14.56
  16   4   0  230.40   14.58
  16  -4   0  258.58   12.28
  16  -4   0  257.21   12.24
 -16   4   0  270.06   11.70
 -16  -4   0  255.91   14.76
  16  -4   0  260.71   13.00
 -16  -4   0  232.02   14.62
 -16   4   0  268.16   13.31
  18  -4   0    0.69    2.79
  18  -4   0    3.45    2.55
  18  -4   0    1.05    3.20
 -18  -4   0   -0.12    3.50
  18  -4   0   -2.93    2.44
 -18   4   0    8.76    4.53
  18   4   0    0.41    3.85
 -18   4   0   -0.24    2.68
  18   4   0   -1.76    2.82
 -18   4   0    5.46    3.19
 -18   4   0   -0.92    1.94
 -18  -4   0   -3.51    3.76
  18   4   0    5.38    3.73
 -18  -4   0    2.05    3.88
  18   4   0   -3.95    3.96
  20   4   0  208.65   13.15
  20  -4   0  195.49   10.48
 -20   4   0  176.27   11.17
 -20   4   0  188.45   11.37
 -20   4   0  192.58   12.94
 -20  -4   0  174.53   12.75
  20   4   0  205.07   13.37
  20   4   0  185.82   11.54
 -20   4   0  189.81    9.93
  20  -4   0  201.32   10.56
 -20  -4   0  163.82   12.39
  20  -4   0  192.03   11.24
  20  -4   0  191.96   11.33
  20   4   0  172.58   12.80
 -22  -4   0   28.86    6.00
  22   4   0   21.47    5.34
  22  -4   0   20.41    4.02
  22  -4   0   23.84    4.75
  22  -4   0   24.11    4.49
  22   4   0   37.97    6.28
 -22  -4   0   24.93    5.61
 -22   4   0   26.88    5.46
 -22   4   0   29.70    3.79
 -22   4   0   31.92    5.25
  22   4   0   29.12    6.11
  22  -4   0   21.63    3.95
 -22   4   0   32.11    5.06
 -24   4   0  118.87    9.41
  24   4   0  124.86   10.88
 -24  -4   0  125.39   10.60
  24  -4   0  130.75    9.56
 -24   4   0  116.68    9.20
 -24   4   0  124.12    7.89
 -24  -4   0  144.32   11.39
 -24   4   0  112.92   10.18
  24  -4   0  123.96    8.41
  24  -4   0  113.69    9.09
  24   4   0   97.66    9.61
  24  -4   0  110.92    8.16
  26  -4   0   16.16    4.69
 -26  -4   0   17.54    5.83
 -26   4   0   14.62    3.60
 -26   4   0    9.13    5.32
  26   4   0    6.93    5.51
 -26   4   0   16.43    5.05
  26   4   0    9.27    5.60
  26  -4   0   14.02    5.10
  26   4   0   11.03    5.29
 -26   4   0   13.91    4.65
  26  -4   0   15.43    4.35
 -26  -4   0   24.21    6.54
 -28   4   0   28.69    6.20
  28   4   0   41.09    7.38
  28  -4   0   29.97    5.91
 -28  -4   0   28.16    6.87
 -28   4   0   30.03    7.02
 -28   4   0   36.95    6.48
 -28   4   0   30.02    4.83
 -28  -4   0   49.18    7.54
 -28  -4   0   22.24    6.81
  28  -4   0   24.22    6.09
  28   4   0   44.16    7.84
  28   4   0   39.77    7.69
  30   4   0    5.51    5.63
 -30  -4   0   -0.93    5.48
  30   4   0    1.18    6.18
  30  -4   0   -6.51    4.08
 -30   4   0    4.59    6.11
 -30  -4   0   -1.39    5.43
 -30  -4   0   -0.17    6.00
 -30   4   0    7.85    3.99
 -30   4   0   -1.12    4.92
  30  -4   0   -1.45    5.28
  30   4   0    4.81    6.05
 -30   4   0    8.86    5.48
  32  -4   0   20.19    5.93
 -32   4   0   28.18    5.24
 -32   4   0   23.78    6.19
 -32  -4   0   24.36    7.11
 -32   4   0   20.74    6.36
 -32  -4   0   35.39    8.24
  32   4   0   24.12    7.68
 -32  -4   0    9.77    6.48
  32   4   0   14.28    7.29
  32   4   0   35.20    7.75
  32  -4   0   33.97    7.06
 -32   4   0   18.78    7.07
 -34   4   0   15.26    6.64
  34   4   0   37.24    8.39
 -34   4   0   23.87    7.08
 -34   4   0   28.08    7.86
  34   4   0   20.38    7.26
 -34  -4   0   27.34    7.72
  34   4   0   17.89    7.33
  34  -4   0   21.94    6.43
 -34   4   0   15.40    5.14
 -34  -4   0   18.79    7.20
 -34  -4   0   26.35    8.03
 -36  -4   0   35.63    8.04
 -36   4   0   26.74    7.32
 -36   4   0   36.20    7.81
  36  -4   0   27.54    7.11
 -36  -4   0   51.67    9.34
  36   4   0   26.21    8.01
 -36  -4   0   38.74    8.87
  36   4   0   27.21    8.08
 -36   4   0   38.92    8.30
  38  -4   0    2.81    5.34
  38   4   0   -2.26    5.61
 -38   4   0    7.18    6.38
 -38  -4   0    2.52    6.33
 -38   4   0   -4.68    5.16
 -38   4   0    2.32    5.31
 -38  -4   0    0.51    6.05
 -40  -4   0   41.72    7.62
 -40   4   0   31.70    7.74
 -40   4   0   43.03    8.36
  40  -4   0   46.65    8.16
 -40   4   0   46.58    8.33
 -40  -4   0   58.20    9.53
  40   4   0   29.00    8.26
 -42   4   0   -5.42    5.57
  42   4   0   -2.15    6.16
 -42   4   0    1.90    5.98
  42  -4   0   -0.92    5.48
 -42  -4   0   -3.19    5.52
 -42   4   0    3.25    6.06
 -44   4   0   19.03    6.91
  44   4   0   21.42    8.30
 -44   4   0   25.00    7.65
 -44  -4   0   22.86    6.80
 -44   4   0   28.47    8.07
  44  -4   0   13.76    6.65
 -46  -4   0    6.80    6.18
 -46   4   0    8.19    6.93
  46  -4   0   -0.31    5.88
  46   4   0   -5.84    6.16
 -46   4   0   -4.02    6.38
 -46   4   0    1.98    6.21
 -48   4   0   42.73    8.83
  48  -4   0   10.92    7.38
  48   4   0   25.60    8.95
  -1  -5   0   87.80    5.26
   1   5   0   80.16    5.49
   1  -5   0   80.13    6.65
  -1   5   0   87.45    5.11
  -1  -5   0   91.67    5.31
   1  -5   0   85.76    4.57
  -1  -5   0   94.25    5.45
   1   5   0   88.10    4.96
   1   5   0   89.52    5.68
   1  -5   0   90.52    4.85
   1  -5   0   81.46    4.51
   1   5   0   90.77    4.94
  -1  -5   0   98.41    6.92
  -1  -5   0   79.61    5.59
  -1   5   0   90.62    5.14
   1  -5   0   88.36    4.98
  -3  -5   0   40.35    4.11
  -3  -5   0   42.66    3.25
  -3  -5   0   40.98    4.53
   3   5   0   43.00    4.14
  -3   5   0   45.72    2.98
  -3  -5   0   39.27    4.00
   3  -5   0   39.74    5.11
  -3  -5   0   34.24    4.07
   3   5   0   43.54    4.46
  -3  -5   0   41.45    4.84
  -3   5   0   47.42    5.36
   3   5   0   40.01    3.82
   5   5   0   69.80    3.96
  -5  -5   0   59.45    5.76
  -5  -5   0   74.32    4.83
  -5   5   0   68.19    6.38
  -5  -5   0   65.41    5.46
   5   5   0   70.97    5.94
   5  -5   0   83.59    6.84
  -5  -5   0   69.22    5.45
   5   5   0   86.91    5.82
   5   5   0   63.14    5.54
  -5  -5   0   58.13    5.26
  -7  -5   0   27.29    4.41
  -7   5   0   35.16    5.11
   7   5   0   36.05    4.73
  -7  -5   0   37.28    3.79
  -7  -5   0   35.80    4.32
   7  -5   0   49.61    5.33
  -7  -5   0   32.79    4.48
   7   5   0   42.79    4.62
   7   5   0   35.29    3.45
   7   5   0   34.85    4.18
  -7  -5   0   39.13    4.54
   7   5   0   36.34    4.54
   9   5   0   11.45    4.06
   9   5   0   22.46    3.24
  -9  -5   0   14.49    3.90
  -9  -5   0   20.74    3.97
   9   5   0   20.11    4.23
  -9  -5   0   24.64    3.87
  -9  -5   0   18.87    4.06
   9   5   0   20.55    3.72
   9   5   0   21.61    4.13
  -9  -5   0   16.45    3.26
   9  -5   0   15.94    4.73
  -9   5   0   22.91    4.51
 -11  -5   0   28.00    4.70
 -11  -5   0   40.94    5.15
 -11  -5   0   29.23    5.04
 -11   5   0   30.95    2.96
 -11  -5   0   43.46    5.00
  11   5   0   42.59    5.21
 -11   5   0   38.33    3.17
  11   5   0   42.34    5.40
  11   5   0   32.32    4.61
 -11   5   0   28.28    4.79
  11   5   0   32.64    3.93
 -13  -5   0   17.94    4.41
 -13  -5   0   16.93    4.30
 -13   5   0   12.69    2.72
 -13  -5   0   24.30    4.78
  13   5   0   14.83    4.26
  13  -5   0   12.37    2.55
 -13   5   0   13.83    4.23
  13   5   0   13.45    3.42
  13   5   0   14.85    4.37
 -13   5   0   12.86    2.65
 -13  -5   0   10.63    3.84
  13   5   0   18.82    3.98
  13  -5   0   15.39    2.28
 -15   5   0  115.55    9.48
  15   5   0  126.24    8.33
  15   5   0  138.23    9.55
 -15  -5   0  132.64    9.70
 -15   5   0  120.15    7.45
  15  -5   0  132.02    7.34
  15  -5   0  126.78    7.41
 -15   5   0  131.84    7.68
 -15  -5   0  135.92    9.87
 -15  -5   0  128.72    9.57
  15   5   0  124.05    9.59
 -15  -5   0  137.68    9.69
  15   5   0  140.97    9.66
  17   5   0   32.98    5.70
  17  -5   0   36.55    3.32
  17  -5   0   37.70    3.90
  17  -5   0   36.68    3.35
 -17   5   0   33.55    4.12
  17   5   0   32.19    5.37
 -17  -5   0   30.23    5.52
  17   5   0   35.54    4.82
 -17   5   0   27.58    4.12
 -17  -5   0   31.28    5.47
 -17   5   0   34.41    5.79
  17  -5   0   32.92    4.13
 -17  -5   0   33.51    5.66
  17  -5   0   31.30    3.05
 -19  -5   0   58.59    7.01
  19   5   0   43.85    6.39
  19  -5   0   54.33    4.33
  19  -5   0   48.83    5.27
 -19   5   0   48.09    5.14
 -19  -5   0   62.09    7.19
  19   5   0   80.37    6.71
 -19   5   0   52.54    6.67
 -19  -5   0   53.40    6.99
 -19   5   0   56.57    5.49
  19  -5   0   45.64    4.40
  19   5   0   53.64    7.08
  19  -5   0   53.43    5.18
  21   5   0   58.81    7.54
  21  -5   0   57.99    4.89
  21   5   0   49.48    7.02
  21  -5   0   59.54    5.11
  21  -5   0   59.72    5.81
  21  -5   0   62.55    6.01
 -21   5   0   67.46    7.55
 -21  -5   0   58.56    7.27
 -21  -5   0   66.74    7.77
 -21  -5   0   75.67    8.08
 -21   5   0   55.10    5.99
 -21   5   0   68.17    6.19
  21   5   0   55.75    7.50
  21   5   0   63.64    6.54
  23  -5   0    4.80    3.98
 -23  -5   0    6.82    4.93
 -23   5   0    5.62    3.71
  23   5   0   -1.47    3.98
  23  -5   0    6.08    3.52
 -23  -5   0   -3.68    4.49
 -23   5   0    4.20    2.44
  23   5   0    7.79    3.98
 -23   5   0    2.78    3.86
  23   5   0    2.79    4.84
  23   5   0   -3.48    4.45
 -23   5   0    6.30    4.74
 -23  -5   0    2.49    4.73
 -25   5   0   23.68    5.12
  25   5   0   22.77    6.19
 -25  -5   0   24.89    6.54
 -25   5   0   23.53    5.38
 -25   5   0   32.90    3.65
  25   5   0   21.08    6.40
 -25  -5   0   18.60    6.09
  25  -5   0   24.30    4.96
  25  -5   0   23.41    5.24
 -25   5   0   26.58    6.48
  25   5   0   26.33    6.55
  25   5   0   21.89    5.16
 -27   5   0    0.06    2.77
 -27   5   0   -4.35    4.30
  27   5   0   -5.84    5.13
 -27   5   0    0.29    5.25
  27   5   0    4.66    5.95
  27   5   0   -4.43    3.89
 -27   5   0   -1.14    4.33
  27  -5   0    6.43    4.09
  27   5   0   -5.30    4.50
 -27  -5   0    8.71    6.08
  27  -5   0   -2.65    4.71
 -27  -5   0    0.85    4.98
  29   5   0    7.57    4.83
  29  -5   0   -5.85    5.33
 -29   5   0   11.35    5.23
  29   5   0   -9.56    5.38
  29  -5   0    3.82    4.47
 -29   5   0    1.66    4.75
  29   5   0   -7.42    4.88
 -29   5   0   -2.91    5.88
  29   5   0  -10.96    5.30
 -29  -5   0    6.42    5.83
 -29  -5   0   -2.97    5.63
 -29   5   0    0.11    3.23
  31   5   0  -12.51    4.15
  31   5   0    3.45    6.28
 -31   5   0   -4.49    5.66
  31  -5   0    9.34    5.91
 -31   5   0    3.75    5.03
  31  -5   0   -4.70    4.41
 -31  -5   0   -0.65    5.25
  31   5   0   -9.44    5.81
 -31  -5   0    0.07    6.26
  31   5   0   -4.32    5.43
 -31   5   0    4.10    5.30
 -31   5   0   -2.92    3.28
  33   5   0    7.20    5.23
 -33   5   0   -0.01    3.68
  33   5   0   -2.81    6.33
 -33   5   0    4.91    5.44
  33   5   0   -6.14    6.26
  33  -5   0    0.15    5.88
  33  -5   0    0.18    4.58
 -33   5   0    4.80    5.80
  33   5   0   -0.15    6.06
 -33  -5   0    3.75    6.88
 -33  -5   0    4.76    5.97
 -33   5   0    1.02    6.12
  35   5   0    6.43    6.51
 -35   5   0   19.51    6.56
  35   5   0   13.11    7.41
 -35   5   0    4.20    5.52
  35   5   0    7.36    5.56
 -35  -5   0    8.87    6.91
 -35  -5   0   -1.70    6.13
 -35  -5   0   17.67    8.08
  35  -5   0    4.60    5.29
 -35   5   0   23.00    7.49
  37  -5   0    0.53    4.90
 -37   5   0   -3.33    5.64
 -37   5   0   -1.79    4.99
  37   5   0   -1.40    5.94
 -37   5   0    2.78    5.62
  37   5   0    6.87    5.63
 -37  -5   0   -5.83    5.76
  39   5   0   -1.32    5.44
 -39   5   0    3.67    5.95
 -39   5   0   -5.60    5.10
  39  -5   0    9.17    5.40
 -39  -5   0   -2.44    5.52
 -39   5   0    6.10    5.84
  41   5   0   -6.05    5.33
  41  -5   0   -3.10    4.81
 -41  -5   0    7.67    6.49
 -41   5   0   -2.40    5.65
 -41   5   0    2.93    5.89
 -41   5   0    9.72    6.32
  43  -5   0    2.75    5.79
 -43   5   0    7.17    6.33
 -43   5   0    8.30    6.41
  43   5   0   -3.11    6.00
 -43   5   0   -3.36    5.80
 -43  -5   0   14.17    6.67
  45   5   0   -6.26    6.07
 -45   5   0   -1.85    5.87
  45  -5   0   -6.10    5.51
 -45  -5   0   -4.74    6.04
 -45   5   0   -3.91    5.90
 -45   5   0   13.66    7.08
 -47   5   0    0.90    7.04
 -47   5   0   -6.49    6.00
  47  -5   0    2.85    6.34
 -47   5   0   -0.07    6.01
  47   5   0    1.39    6.89
   0   6   0   75.85    6.80
   0   6   0   83.41    5.44
   0  -6   0   79.26    4.82
   0   6   0   82.38    5.41
   0  -6   0   81.53    4.81
   0  -6   0   75.11    5.24
   0  -6   0   83.47    6.92
   0  -6   0   84.73    5.14
  -2  -6   0  209.71   10.59
  -2   6   0  194.05    9.71
  -2  -6   0  206.09   11.80
   2   6   0  210.70   10.78
  -2  -6   0  213.00   10.85
   2  -6   0  213.73    9.66
   2  -6   0  209.74    9.57
  -2  -6   0  207.51   10.36
   2   6   0  212.48   10.07
   2  -6   0  219.50   12.23
  -2  -6   0  199.85   10.28
   2   6   0  204.17   10.07
  -2   6   0  190.28   11.97
  -2   6   0  216.85    9.96
   2   6   0  203.05   10.80
  -4  -6   0  918.38   38.05
  -4   6   0  953.68   41.99
   4   6   0  899.35   40.34
  -4  -6   0  906.84   39.81
  -4  -6   0  937.15   40.05
  -4  -6   0  933.34   41.19
  -4  -6   0  945.69   40.65
   4  -6   0  946.81   41.77
   4   6   0  936.77   40.30
   4   6   0  935.27   40.03
  -4  -6   0  951.78   40.49
   6   6   0   44.66    5.05
   6   6   0   42.00    2.98
  -6  -6   0   39.87    4.61
  -6  -6   0   38.43    4.54
  -6  -6   0   43.12    4.91
  -6  -6   0   48.44    4.75
   6  -6   0   48.19    5.73
  -6   6   0   34.21    5.30
   6   6   0   39.59    4.96
   6   6   0   51.03    4.81
  -6  -6   0   40.67    3.91
  -8  -6   0  382.68   17.53
   8   6   0  371.78   18.99
   8   6   0  350.78   18.69
  -8  -6   0  419.79   19.16
  -8  -6   0  386.99   18.85
   8   6   0  392.01   16.85
   8   6   0  383.34   18.63
  -8  -6   0  376.66   18.54
  -8  -6   0  353.43   18.87
  10   6   0   48.83    4.99
  10   6   0   40.43    5.34
 -10  -6   0   37.09    4.81
 -10  -6   0   46.76    5.30
  10   6   0   39.68    5.30
  10   6   0   38.25    4.03
 -10  -6   0   30.98    4.80
 -10   6   0   39.15    5.83
 -10  -6   0   39.03    4.39
 -10  -6   0   42.31    5.29
 -12   6   0   18.69    4.42
  12   6   0   27.47    5.05
  12   6   0   37.29    5.36
 -12  -6   0   36.94    5.05
  12   6   0   25.45    3.75
 -12  -6   0   34.21    4.92
  12   6   0   21.31    4.23
 -12  -6   0   33.13    4.27
 -12  -6   0   26.72    4.80
 -12   6   0   25.40    2.57
 -12  -6   0   29.64    5.24
 -12   6   0   28.84    2.84
  14   6   0  103.81    8.46
 -14  -6   0   90.25    8.17
 -14  -6   0   94.99    8.08
 -14  -6   0   90.63    7.77
 -14   6   0   91.11    5.56
 -14   6   0   75.20    7.71
  14  -6   0   91.19    5.31
  14   6   0   98.23    6.86
  14   6   0   88.02    7.63
 -14   6   0   88.52    5.57
  14  -6   0   87.85    5.19
  14   6   0   75.59    7.66
 -14  -6   0  101.99    8.19
 -16  -6   0   87.46    8.06
  16   6   0   83.04    7.72
 -16   6   0   81.47    8.02
 -16  -6   0   70.18    7.69
 -16   6   0   77.67    5.68
  16  -6   0   90.24    5.51
  16   6   0   83.71    6.80
 -16   6   0   84.43    5.74
  16   6   0   80.48    8.03
  16  -6   0   78.79    5.58
  16   6   0   78.84    8.02
 -16  -6   0   90.67    8.06
 -16  -6   0   77.62    7.82
 -18   6   0    6.25    3.23
  18   6   0   -2.10    4.26
  18  -6   0   -0.80    2.31
 -18   6   0    0.34    2.95
  18   6   0   12.65    4.33
  18  -6   0    2.37    2.86
 -18   6   0   -1.21    4.32
 -18  -6   0   -1.44    4.16
  18   6   0    2.86    3.37
 -18  -6   0    4.50    4.48
 -18  -6   0    4.09    4.25
  18   6   0   13.69    4.58
 -20   6   0    0.62    4.32
  20   6   0    3.53    4.73
  20   6   0   -3.20    3.65
  20   6   0   -0.95    1.76
 -20  -6   0    5.54    4.39
  20  -6   0    1.21    2.66
 -20  -6   0   -5.40    4.04
 -20  -6   0   -2.33    4.13
 -20   6   0   -0.04    2.98
  20   6   0    1.06    3.31
 -20   6   0    1.85    3.15
  20  -6   0    3.19    3.28
 -22   6   0   -0.26    3.32
 -22  -6   0    7.84    4.94
  22  -6   0    7.22    3.33
  22  -6   0    2.39    3.72
 -22  -6   0   -0.78    4.64
  22   6   0   -2.04    3.56
  22   6   0   -0.54    4.66
 -22  -6   0   -7.39    4.25
  22   6   0    3.19    4.26
 -22   6   0   -2.02    3.26
 -22   6   0   -3.87    4.42
 -24   6   0    4.03    5.00
 -24  -6   0   19.23    6.02
 -24  -6   0   15.86    6.03
  24   6   0    6.59    4.81
 -24  -6   0   10.73    5.47
 -24   6   0   15.18    4.35
  24   6   0   16.27    4.85
  24   6   0   20.77    6.30
  24  -6   0   15.06    4.07
  24   6   0    6.61    5.66
  24  -6   0   19.43    4.83
 -24   6   0   14.38    4.44
 -26  -6   0   15.23    6.37
 -26   6   0    6.04    5.36
 -26  -6   0   -5.87    4.65
  26  -6   0    5.33    3.90
 -26  -6   0    1.97    5.32
 -26   6   0    7.33    4.56
  26   6   0    2.85    4.69
 -26   6   0    0.32    4.12
  26  -6   0    9.94    4.72
  26   6   0    2.98    5.75
  26   6   0    8.95    4.73
  26   6   0    3.82    5.80
 -28   6   0   -7.61    4.21
  28   6   0    1.11    4.66
  28  -6   0    2.30    4.81
  28   6   0   -1.02    5.71
  28   6   0  -10.08    4.23
 -28   6   0    6.70    5.94
  28   6   0    1.42    6.01
 -28  -6   0    3.54    5.63
  28  -6   0    7.68    4.46
 -28   6   0    9.04    4.84
 -28  -6   0   -1.88    5.96
 -28  -6   0    9.57    6.09
 -30   6   0   52.72    7.45
 -30  -6   0   38.21    8.55
  30  -6   0   43.19    7.19
  30  -6   0   37.99    6.47
 -30   6   0   66.90    7.65
  30   6   0   45.06    8.78
 -30  -6   0   24.51    7.46
  30   6   0   50.18    8.86
  30   6   0   44.82    7.76
 -30   6   0   48.93    8.38
 -30  -6   0   35.54    7.90
  30   6   0   32.30    6.51
  32  -6   0   14.39    5.48
  32   6   0   13.84    7.39
 -32  -6   0   16.42    7.01
  32   6   0   15.08    6.70
  32  -6   0   15.03    6.01
 -32   6   0   13.08    5.89
 -32   6   0   12.40    5.91
 -32   6   0    9.14    6.91
  32   6   0    7.38    6.87
  32   6   0   10.01    5.80
 -32  -6   0   11.74    7.41
  34   6   0   38.75    7.58
 -34  -6   0   55.73    9.97
 -34  -6   0   50.09    9.22
  34   6   0   57.94    9.33
 -34   6   0   38.69    7.39
 -34   6   0   26.88    6.94
  34   6   0   44.95    9.49
 -34   6   0   41.04    8.53
  34  -6   0   51.46    7.62
  36   6   0    4.76    5.55
 -36  -6   0   -1.17    6.22
 -36   6   0    7.75    5.90
 -36   6   0    8.79    6.67
 -36   6   0    2.03    5.28
  36   6   0   10.27    6.55
  36  -6   0    6.10    5.27
  38   6   0    3.53    5.98
  38   6   0    8.25    5.93
 -38  -6   0   23.65    7.68
 -38   6   0    5.81    6.17
 -38   6   0    8.56    5.72
 -38   6   0    9.07    5.55
  38  -6   0   15.86    5.56
 -40   6   0  -12.96    4.87
 -40   6   0    4.20    5.65
  40  -6   0    5.75    5.03
 -40   6   0   -0.10    5.79
 -40  -6   0    4.10    6.62
  40   6   0    5.23    6.10
 -42   6   0   -5.16    5.74
  42  -6   0   -4.95    4.96
  42   6   0   -3.33    6.07
 -42   6   0    0.93    5.90
 -42   6   0    1.56    6.18
 -42  -6   0   -4.49    6.36
 -44   6   0   15.25    7.24
  44   6   0   -7.07    6.13
  44  -6   0    4.33    5.73
 -44   6   0    1.54    6.10
 -44   6   0   -0.39    5.93
  46  -6   0   -2.90    5.30
 -46   6   0    8.42    6.40
  46   6   0    3.55    6.82
 -46   6   0    9.76    7.09
 -46   6   0    1.97    6.32
  -1  -7   0   25.27    3.08
  -1   7   0   25.93    3.39
  -1  -7   0   24.88    3.00
   1   7   0   29.15    3.61
   1   7   0   34.41    3.89
  -1  -7   0   26.05    3.64
   1   7   0   29.88    2.59
   1  -7   0   26.47    2.92
   1  -7   0   27.61    3.23
  -1  -7   0   28.42    3.40
   1   7   0   27.05    2.49
  -1   7   0   24.97    3.10
  -1   7   0   24.90    4.90
   1  -7   0   27.24    2.40
  -3  -7   0   66.32    5.63
   3   7   0   65.88    5.59
  -3  -7   0   75.83    5.29
   3   7   0   59.56    5.40
  -3  -7   0   71.30    5.19
   3   7   0   78.46    5.07
  -3  -7   0   76.68    6.48
   3  -7   0   70.31    4.24
  -3  -7   0   77.72    4.30
  -3   7   0   72.84    4.58
  -3   7   0   67.98    4.50
  -3   7   0   63.17    6.75
  -3  -7   0   78.32    5.52
  -5   7   0    0.28    3.30
   5   7   0    1.10    2.76
  -5  -7   0   -0.64    2.67
   5   7   0   -0.20    3.06
  -5  -7   0    0.49    2.72
  -5  -7   0    4.42    2.88
  -5  -7   0    0.37    3.04
  -5  -7   0   -0.81    2.15
  -5  -7   0    0.68    3.46
  -7  -7   0   23.17    3.35
  -7   7   0   19.80    4.35
  -7  -7   0   22.98    4.30
  -7  -7   0   17.81    3.68
  -7  -7   0   19.95    3.81
   7   7   0   22.43    4.24
  -7  -7   0   21.21    3.85
   7   7   0   16.53    4.03
  -9   7   0   19.25    4.83
   9   7   0   19.53    4.15
  -9  -7   0   22.58    3.51
   9   7   0   12.39    3.40
  -9  -7   0   15.64    3.80
  -9  -7   0   13.37    3.82
   9   7   0   17.18    4.09
  -9  -7   0    9.78    3.87
   9   7   0   14.48    2.67
  -9  -7   0   10.75    3.61
 -11   7   0   40.06    6.09
  11   7   0   55.64    5.61
  11   7   0   47.37    5.82
  11   7   0   50.21    4.44
 -11  -7   0   55.31    5.20
 -11  -7   0   46.23    5.91
  11   7   0   52.35    6.08
 -11  -7   0   54.55    5.83
 -11  -7   0   38.25    5.19
 -11  -7   0   59.12    5.97
 -13  -7   0   97.61    8.28
 -13  -7   0   89.68    8.36
  13   7   0   89.14    8.26
 -13  -7   0   92.73    8.14
  13   7   0  105.28    8.77
 -13   7   0   98.37    5.44
 -13   7   0  101.06    8.89
  13   7   0  100.53    6.86
 -13  -7   0  107.78    8.37
 -13  -7   0   85.89    7.09
  13   7   0  112.05    8.27
  15   7   0    9.07    3.92
 -15  -7   0   10.61    4.62
 -15   7   0   10.82    2.71
  15  -7   0    9.88    2.09
  15   7   0   23.74    5.27
  15   7   0   11.19    4.66
  15  -7   0    9.63    2.33
 -15   7   0    9.27    4.62
  15   7   0    2.22    3.16
 -15   7   0   10.05    2.42
 -15  -7   0   12.57    4.51
 -15  -7   0   10.53    4.32
 -15  -7   0   14.30    5.05
  17  -7   0    1.54    2.52
 -17   7   0    6.09    4.66
  17   7   0    1.99    3.27
  17   7   0    2.02    4.45
 -17   7   0    5.35    2.70
 -17  -7   0   -3.41    3.90
 -17  -7   0   -0.43    3.78
 -17  -7   0   -0.37    4.10
  17   7   0   -3.03    3.49
  17  -7   0    4.44    2.21
 -17   7   0    0.89    2.50
  17   7   0   -1.35    4.39
 -17  -7   0    3.85    4.13
 -19  -7   0   70.27    8.43
  19   7   0   91.36    8.56
  19   7   0   74.70    6.91
  19  -7   0   79.64    6.01
  19   7   0   84.30    8.85
 -19  -7   0   77.56    8.32
 -19   7   0   78.98    8.72
  19   7   0   80.34    8.86
 -19   7   0   84.30    6.27
 -19   7   0   81.90    6.19
  19  -7   0   86.03    5.94
 -19  -7   0   86.36    8.62
 -21  -7   0   60.10    7.85
  21   7   0   65.42    6.85
  21  -7   0   62.79    5.38
  21   7   0   66.81    7.77
  21   7   0   46.72    7.33
 -21   7   0   54.29    5.67
 -21  -7   0   60.62    7.57
  21  -7   0   56.97    5.56
  21   7   0   60.71    8.31
 -21   7   0   56.33    7.71
 -21  -7   0   76.33    8.38
 -21   7   0   49.77    5.43
 -23  -7   0   17.49    5.95
  23  -7   0   14.29    3.89
 -23  -7   0   17.31    5.75
 -23   7   0   10.77    5.57
  23   7   0   19.61    6.17
 -23   7   0   19.30    4.42
 -23   7   0    9.83    3.94
  23  -7   0    4.69    3.91
 -23  -7   0   14.27    5.82
  23   7   0   15.66    5.39
  23   7   0   16.00    4.81
 -25   7   0   28.51    5.36
 -25   7   0   27.32    7.08
 -25  -7   0   25.23    6.71
 -25  -7   0   14.12    6.17
  25   7   0   21.57    5.32
 -25   7   0   12.40    4.66
  25   7   0   15.87    6.79
  25   7   0   14.12    5.72
  25  -7   0   20.81    4.42
 -25  -7   0   23.43    6.69
  25  -7   0   16.73    4.91
 -27  -7   0   12.45    6.46
 -27  -7   0   11.81    6.39
  27   7   0   16.93    6.86
 -27  -7   0   17.25    6.57
  27   7   0   17.67    6.40
 -27   7   0   12.21    6.40
 -27   7   0   20.73    5.23
  27   7   0   12.29    6.55
  27   7   0   19.59    5.51
  27  -7   0   18.17    4.59
 -27   7   0   15.39    5.13
  27  -7   0    9.06    5.07
  29   7   0   26.88    7.90
 -29  -7   0   44.27    8.41
  29   7   0   37.68    8.43
 -29   7   0   43.26    6.64
  29   7   0   43.61    7.98
 -29   7   0   34.45    6.17
  29  -7   0   44.96    6.69
 -29  -7   0   46.73    8.43
 -29   7   0   36.49    7.68
  29  -7   0   31.82    5.94
  29   7   0   29.14    6.36
 -29  -7   0   37.42    8.13
  31   7   0   -0.04    6.65
 -31   7   0   -5.58    4.50
 -31  -7   0   -3.81    6.14
 -31   7   0   -1.26    5.93
 -31   7   0   -1.59    4.77
  31   7   0   12.66    7.23
 -31  -7   0    7.19    7.20
  31  -7   0    2.37    4.65
  31  -7   0   -0.07    5.29
 -31  -7   0    2.21    6.21
  31   7   0   -1.11    5.10
  31   7   0    6.93    6.27
 -33   7   0    7.51    5.42
 -33  -7   0   18.57    7.46
  33   7   0    1.65    5.50
  33   7   0    1.70    6.77
  33   7   0    4.73    6.16
 -33   7   0    6.77    5.49
 -33  -7   0    3.46    6.44
  33  -7   0   10.67    5.17
 -33   7   0    9.48    6.65
  35   7   0    8.61    5.77
  35  -7   0    6.79    4.70
 -35   7   0    9.49    5.45
 -35  -7   0   11.62    7.30
  35   7   0   10.89    6.76
 -35   7   0   14.87    6.70
 -35   7   0    6.17    5.48
  37   7   0   11.78    6.53
 -37   7   0   -1.31    5.77
 -37   7   0    3.18    5.15
 -37  -7   0    9.01    7.03
  37  -7   0   -3.80    4.38
 -37   7   0    6.72    5.49
  37   7   0    8.90    5.76
  39   7   0   -0.26    6.13
 -39   7   0   -5.20    4.68
 -39  -7   0   -3.70    6.11
  39  -7   0    6.98    5.39
 -39   7   0    0.94    5.20
 -39   7   0    5.66    5.99
 -41   7   0    6.76    6.48
 -41   7   0    5.67    5.93
  41  -7   0   -0.43    4.99
  41   7   0   -4.35    5.75
 -41   7   0    1.50    5.69
 -41  -7   0    9.38    7.17
 -43   7   0   16.30    7.40
  43   7   0   10.76    7.77
 -43  -7   0   20.36    8.43
  43  -7   0   11.42    6.30
 -43   7   0    6.17    6.45
 -43   7   0   11.82    6.72
  45   7   0   -3.60    6.36
 -45   7   0    4.01    6.18
 -45   7   0   -9.38    5.27
  45  -7   0    7.65    6.05
 -45   7   0    0.65    6.26
  47   7   0    8.40    7.44
  47  -7   0    2.38    5.70
 -47   7   0   18.72    7.30
 -47   7   0   11.49    7.01
 -47   7   0    4.90    6.58
   0  -8   0  126.22    7.30
   0   8   0  128.07    7.46
   0  -8   0  117.62    7.38
   0   8   0  127.05    7.63
   0  -8   0  126.25    6.60
   0  -8   0  123.06    6.59
  -2   8   0   17.41    2.95
   2   8   0   18.69    2.49
   2   8   0   10.62    3.31
  -2  -8   0   14.58    2.91
  -2  -8   0   16.78    3.08
  -2   8   0   14.48    4.32
   2   8   0   14.34    3.50
   2  -8   0   16.20    2.85
   2  -8   0   19.00    2.63
  -2   8   0   18.58    2.99
  -2  -8   0   15.10    2.83
  -2  -8   0   18.36    3.50
  -4   8   0   32.92    3.10
  -4  -8   0   35.16    3.30
  -4  -8   0   40.85    4.36
  -4   8   0   37.06    5.58
   4  -8   0   30.76    2.84
  -4  -8   0   34.42    4.51
   4   8   0   38.84    4.66
   4   8   0   33.18    4.38
  -4  -8   0   34.13    3.97
  -4  -8   0   37.96    4.08
  -4   8   0   36.54    3.22
   4   8   0   34.50    3.79
  -6   8   0   66.99    7.34
  -6  -8   0   72.03    5.17
   6   8   0   74.40    6.36
  -6  -8   0   68.36    5.97
  -6  -8   0   74.44    5.85
  -6  -8   0   61.44    6.25
   6   8   0   71.18    6.38
  -6  -8   0   65.23    5.75
  -8   8   0  132.29   10.25
   8   8   0  140.93    9.70
  -8  -8   0  154.05    9.37
   8   8   0  119.04    9.07
  -8  -8   0  145.35    9.41
  -8  -8   0  133.28    9.44
  -8  -8   0  127.64    8.03
  -8  -8   0  135.56    8.99
  10   8   0  210.18   12.26
 -10   8   0  214.82   13.88
 -10  -8   0  209.28   12.92
 -10  -8   0  225.28   12.74
 -10  -8   0  197.43   12.15
  10   8   0  196.51    9.92
 -10  -8   0  208.34   12.43
  10   8   0  195.63   12.59
 -10  -8   0  194.97   11.21
  10   8   0  199.11   12.74
  12   8   0  382.84   21.02
 -12  -8   0  400.88   20.58
 -12  -8   0  405.47   21.43
 -12  -8   0  377.94   20.58
 -12  -8   0  400.85   19.48
  12   8   0  397.42   21.21
  12   8   0  397.72   20.53
  12   8   0  419.38   18.38
 -12  -8   0  399.64   20.94
  14   8   0   40.46    4.63
 -14  -8   0   50.31    5.53
  14   8   0   42.63    6.30
  14   8   0   45.34    5.88
 -14  -8   0   53.36    6.41
 -14   8   0   55.63    7.35
 -14  -8   0   36.72    5.75
 -14  -8   0   44.57    6.53
 -14   8   0   38.94    3.35
  14   8   0   37.74    6.32
 -14  -8   0   34.82    5.68
  16   8   0  381.89   20.53
 -16  -8   0  331.36   20.60
 -16  -8   0  369.78   20.63
  16   8   0  360.38   20.83
 -16   8   0  378.28   17.11
 -16  -8   0  397.69   21.11
 -16   8   0  381.75   17.08
  16   8   0  410.07   18.73
  16   8   0  404.40   21.67
 -16   8   0  356.41   21.41
 -16  -8   0  354.15   20.28
 -18   8   0   13.25    3.21
  18   8   0   10.68    5.25
 -18  -8   0   12.68    5.46
 -18  -8   0   16.50    5.19
 -18   8   0   20.68    5.45
  18   8   0    9.99    4.14
  18   8   0   16.67    4.23
 -18   8   0   16.17    3.25
  18   8   0   20.88    5.67
  18  -8   0   16.95    2.82
  18  -8   0   15.92    3.13
 -18  -8   0   19.49    5.48
 -20  -8   0  411.27   23.21
  20   8   0  408.78   23.05
 -20   8   0  364.18   23.17
 -20  -8   0  382.69   22.88
  20  -8   0  448.98   19.77
  20   8   0  450.82   24.11
 -20   8   0  412.64   19.74
  20   8   0  413.40   23.85
 -20   8   0  431.40   19.86
  20   8   0  440.67   21.23
 -20  -8   0  378.94   23.13
  20  -8   0  426.35   19.61
  22  -8   0   24.43    3.89
  22   8   0   29.02    6.83
  22   8   0   21.39    5.01
  22  -8   0   26.59    4.54
 -22  -8   0   31.00    7.00
 -22   8   0   24.90    4.40
 -22   8   0    6.53    5.66
 -22  -8   0   32.26    6.72
 -22   8   0   28.25    4.37
  22   8   0   29.68    6.18
  22   8   0   22.99    6.66
 -22  -8   0   18.63    5.83
 -24  -8   0  440.52   24.56
  24   8   0  374.36   23.89
 -24   8   0  367.48   23.87
  24   8   0  445.31   25.14
 -24   8   0  412.32   20.67
 -24  -8   0  401.66   24.26
  24   8   0  421.24   24.08
  24   8   0  408.46   21.68
 -24  -8   0  438.23   24.48
  24  -8   0  410.91   20.57
 -24   8   0  429.00   20.84
  24  -8   0  418.16   20.63
  26   8   0   -0.61    4.57
 -26   8   0   12.95    4.52
 -26  -8   0    8.50    6.79
  26   8   0   10.89    5.42
  26  -8   0    7.74    3.90
  26  -8   0    5.85    4.57
 -26   8   0    6.53    4.48
 -26   8   0    0.00    6.03
 -26  -8   0    1.77    5.51
  26   8   0    5.73    6.67
 -26  -8   0   13.89    6.13
 -28  -8   0  212.98   16.47
 -28   8   0  209.54   13.49
 -28  -8   0  224.61   16.72
  28   8   0  225.66   17.27
  28   8   0  226.78   14.74
 -28   8   0  231.23   13.72
  28  -8   0  233.57   13.74
  28   8   0  209.46   16.10
 -28  -8   0  201.62   16.33
  28  -8   0  173.85   12.68
 -28   8   0  199.53   16.28
  30   8   0   58.37    8.12
 -30   8   0   73.77   10.41
 -30   8   0   63.83    7.58
  30   8   0   42.99    9.25
 -30   8   0   68.19    7.91
 -30  -8   0   70.27   10.41
  30  -8   0   65.76    7.83
  30   8   0   69.12   10.46
  30  -8   0   62.06    7.43
 -30  -8   0   81.73   10.73
 -30  -8   0   57.93    9.46
  30   8   0   44.93    8.70
 -32   8   0   34.52    6.51
  32  -8   0   28.89    6.04
  32   8   0   39.65    7.13
 -32   8   0   33.67    6.38
  32   8   0   24.02    8.74
 -32   8   0   21.90    7.90
 -32  -8   0   36.87    8.41
  32   8   0   39.61    8.17
 -32  -8   0   38.19    8.61
 -34   8   0   18.08    5.84
  34  -8   0   22.76    5.77
 -34   8   0   26.46    5.94
  34   8   0   22.21    6.19
  34   8   0   25.37    7.73
 -34  -8   0   31.31    7.98
 -34   8   0   24.37    7.59
  36   8   0   44.25    8.88
  36   8   0   35.14    7.02
 -36   8   0   33.45    8.28
 -36   8   0   34.40    6.75
  36  -8   0   24.91    5.96
 -36  -8   0   34.32    8.58
 -36   8   0   21.84    6.18
  38   8   0    9.03    6.51
 -38   8   0    2.91    5.31
  38  -8   0    8.99    5.35
  38   8   0   -2.64    4.98
 -38   8   0   18.79    7.31
 -38   8   0    4.95    5.47
 -38  -8   0    4.00    6.77
 -40   8   0   99.35   12.49
 -40  -8   0   77.49   11.64
 -40   8   0   90.12   10.29
  40  -8   0   72.41    9.32
 -40   8   0   92.63   10.18
  40   8   0   82.16   12.04
  42   8   0    2.22    6.29
 -42   8   0    0.92    5.89
 -42  -8   0   -8.62    6.40
  42  -8   0   -0.35    4.80
 -42   8   0    3.64    6.46
 -42   8   0    3.97    5.79
 -44   8   0   29.58    7.71
 -44   8   0   30.39    8.52
 -44  -8   0   30.68    9.05
  44   8   0   21.18    8.63
  44  -8   0   30.15    7.28
 -44   8   0   34.48    7.76
 -46   8   0   -4.35    6.10
 -46   8   0   -1.05    6.55
  46  -8   0   -2.00    5.27
 -46   8   0   -2.76    5.99
  46   8   0   -3.50    6.73
  -1   9   0   -0.46    2.53
   1  -9   0    1.34    2.80
  -1   9   0    2.67    2.92
   1   9   0   -1.31    3.03
   1   9   0    0.75    2.82
  -1  -9   0   -0.37    2.68
  -1  -9   0    0.90    2.37
  -1  -9   0    1.72    2.44
  -1  -9   0    3.73    2.17
   1  -9   0    0.53    2.23
   3   9   0   78.54    6.27
   3   9   0   88.66    6.67
  -3  -9   0   76.86    5.49
  -3   9   0   67.31    5.12
  -3   9   0   71.98    7.72
  -3   9   0   63.06    4.91
   3  -9   0   68.87    4.96
   3   9   0   70.27    4.95
  -3  -9   0   59.53    6.03
   3  -9   0   73.62    4.83
  -3  -9   0   86.74    5.73
  -3  -9   0   73.15    4.52
  -3  -9   0   76.81    5.96
  -5   9   0   27.82    3.10
  -5  -9   0   23.09    3.93
   5   9   0   20.77    4.17
  -5   9   0   26.30    3.13
   5   9   0   30.55    3.79
  -5  -9   0   29.60    3.42
  -5  -9   0   35.56    4.27
  -5   9   0   18.30    5.11
  -5  -9   0   26.61    4.20
   5   9   0   27.19    4.71
  -5  -9   0   24.12    4.71
  -7  -9   0   10.00    3.49
   7   9   0   13.11    4.39
  -7  -9   0   14.59    4.35
  -7  -9   0   10.55    3.61
   7   9   0   14.49    3.89
  -7  -9   0   11.75    3.79
  -7   9   0   10.11    4.88
  -7  -9   0    9.18    3.07
  -9  -9   0   -2.33    3.38
   9   9   0    2.49    3.92
  -9  -9   0    7.93    3.58
   9   9   0    2.59    3.95
  -9  -9   0    1.28    3.57
  -9  -9   0    5.37    3.56
  -9  -9   0    3.70    3.08
  -9   9   0    2.41    4.42
 -11  -9   0   -0.69    3.49
  11   9   0    5.29    4.23
 -11  -9   0    6.22    3.77
 -11  -9   0    5.11    4.25
 -11  -9   0    2.04    3.05
  11   9   0    0.26    4.10
  11   9   0   -1.92    2.05
 -11   9   0    5.21    4.41
  11   9   0   -0.18    3.24
 -11  -9   0   -4.13    3.25
 -13  -9   0    5.90    4.08
 -13  -9   0   -1.55    3.70
 -13  -9   0    1.94    4.40
  13   9   0    1.66    4.32
  13   9   0    5.25    2.83
 -13   9   0    2.07    4.67
  13   9   0    4.01    4.44
  13   9   0    8.74    3.72
 -13  -9   0    0.30    3.58
 -13  -9   0    1.96    3.34
  15   9   0    6.60    3.23
 -15  -9   0   14.34    5.26
  15   9   0    4.18    4.58
 -15  -9   0    8.73    4.52
 -15  -9   0   10.43    4.77
  15   9   0   12.36    5.09
 -15  -9   0    3.21    3.59
 -15   9   0   12.41    5.40
  15   9   0   10.67    4.04
 -15  -9   0   12.41    4.78
 -17  -9   0    3.06    4.31
 -17   9   0    1.19    4.97
  17   9   0    2.93    3.42
  17   9   0   -0.40    3.68
 -17   9   0    0.34    2.39
 -17  -9   0    2.64    4.63
 -17  -9   0    7.18    4.92
  17   9   0    1.57    4.69
  17   9   0   -3.17    4.34
 -17   9   0   -1.40    2.31
 -17  -9   0   -1.32    4.08
 -19  -9   0    4.13    4.87
 -19  -9   0   13.26    5.39
  19   9   0    8.35    4.68
  19  -9   0   15.93    2.76
  19   9   0    8.80    5.56
  19   9   0   16.90    6.19
  19  -9   0   13.91    3.18
 -19   9   0    7.15    5.64
 -19   9   0   12.48    3.22
  19   9   0    9.16    3.92
 -19   9   0   11.84    3.20
 -19  -9   0   11.64    5.57
  21   9   0   28.07    6.09
 -21   9   0   30.97    4.27
  21   9   0   28.86    5.29
  21   9   0   24.89    6.78
 -21  -9   0   29.85    7.03
 -21   9   0   19.05    6.74
 -21  -9   0   22.81    6.27
  21   9   0   22.09    6.79
  21  -9   0   27.75    3.78
 -21   9   0   22.84    3.98
 -21  -9   0   14.71    6.31
  21  -9   0   27.46    4.22
  23   9   0   -3.29    5.73
 -23  -9   0    6.66    5.83
 -23  -9   0    6.73    5.54
  23   9   0   -0.88    6.04
  23  -9   0    1.54    3.12
  23   9   0    3.63    4.58
 -23   9   0   13.54    6.59
 -23   9   0    0.19    3.41
 -23   9   0   -2.75    3.49
  23   9   0    5.42    4.38
  23  -9   0    4.98    4.01
 -23  -9   0    6.86    5.71
  25  -9   0    8.95    4.45
 -25  -9   0   15.21    6.66
  25   9   0    9.37    6.78
  25  -9   0    8.03    3.62
 -25  -9   0    8.46    6.59
 -25   9   0   10.41    4.12
  25   9   0    8.43    6.55
 -25   9   0    5.10    4.07
 -25  -9   0    1.40    5.62
  25   9   0    2.38    4.49
 -25   9   0    4.50    6.23
  25   9   0   -0.80    4.74
  27   9   0   -0.80    6.01
 -27   9   0    7.51    4.50
  27  -9   0   -3.42    4.41
 -27  -9   0    2.52    6.43
 -27  -9   0   -1.66    6.15
  27   9   0    3.96    5.00
  27   9   0    6.23    6.60
 -27   9   0    7.96    6.64
 -27   9   0    6.49    4.42
  27  -9   0   -2.10    3.58
  27   9   0   -1.42    4.54
 -27  -9   0   -8.49    5.11
  29  -9   0   -0.53    4.60
 -29  -9   0    5.24    7.05
 -29   9   0    2.11    4.55
  29   9   0    0.05    5.10
 -29  -9   0    3.73    6.38
  29   9   0   12.65    7.22
 -29  -9   0    6.05    6.46
 -29   9   0    3.71    4.73
 -29   9   0    5.25    6.66
  29   9   0   14.24    5.67
  29  -9   0   -7.27    3.75
  31   9   0   -1.23    5.65
 -31   9   0   -6.49    5.91
 -31   9   0    3.43    4.75
 -31  -9   0   10.01    6.90
  31  -9   0   -7.40    4.06
  31   9   0   -0.57    5.11
 -31   9   0    2.23    4.58
 -31  -9   0    4.37    6.35
 -33   9   0   -4.35    5.84
 -33  -9   0    1.01    6.38
  33   9   0    0.42    5.04
 -33   9   0   13.10    5.23
  33   9   0    1.92    5.87
 -33   9   0    0.39    4.87
  33  -9   0   -1.53    3.82
  35   9   0   -0.92    5.60
  35   9   0   -3.66    4.76
 -35   9   0    2.11    4.97
 -35   9   0   10.58    6.75
 -35   9   0   -0.71    4.56
  35  -9   0   -4.25    3.99
 -35  -9   0   10.98    6.95
  37  -9   0    0.46    4.51
 -37   9   0    1.48    5.18
  37   9   0    3.72    5.24
 -37  -9   0   -2.81    5.87
 -37   9   0    4.63    6.24
 -37   9   0   -0.75    4.67
  37   9   0    0.09    5.91
 -39   9   0   -3.21    5.20
  39   9   0    1.31    6.27
  39   9   0   -3.28    5.57
 -39  -9   0   -5.32    7.03
  39  -9   0    2.30    5.02
 -39   9   0   -2.59    5.07
 -39   9   0   -3.98    5.79
 -41   9   0    2.11    5.69
 -41  -9   0    0.46    6.65
  41   9   0   -1.48    6.61
 -41   9   0    4.89    5.59
 -41   9   0    8.41    7.08
  41  -9   0    1.27    4.85
 -43   9   0   -5.25    6.06
  43  -9   0    2.31    5.39
 -43  -9   0   11.32    7.56
 -43   9   0    0.93    5.67
  43   9   0   -7.30    5.96
 -43   9   0   -5.23    5.43
 -45   9   0   -3.26    5.46
 -45   9   0    3.48    5.77
 -45   9   0    2.35    6.70
  45   9   0    2.11    7.27
  45  -9   0    0.55    5.31
   0 -10   0  628.97   27.25
   0  10   0  677.11   29.26
   0 -10   0  640.15   27.29
   0 -10   0  650.01   28.92
   0 -10   0  630.39   29.05
   0  10   0  624.62   28.86
  -2 -10   0  246.01   12.26
   2  10   0  255.98   13.61
   2 -10   0  247.13   12.37
  -2  10   0  258.26   12.74
   2  10   0  255.29   13.75
  -2  10   0  221.64   12.49
  -2 -10   0  256.90   13.64
  -2 -10   0  250.68   12.29
   2 -10   0  234.14   12.51
  -2 -10   0  245.19   13.21
   4  10   0  837.82   34.72
   4  10   0  742.98   36.07
   4  10   0  804.64   36.28
  -4  10   0  806.21   39.07
   4 -10   0  793.88   34.41
  -4 -10   0  796.08   36.50
   4 -10   0  775.93   34.27
  -4  10   0  844.51   34.57
  -4 -10   0  791.35   35.04
  -4  10   0  777.01   34.30
  -4 -10   0  804.76   35.01
  -4 -10   0  800.58   33.43
  -4 -10   0  798.17   36.23
  -6 -10   0   38.76    4.70
   6  10   0   35.78    5.15
  -6  10   0   35.08    3.51
   6  10   0   23.76    5.16
  -6 -10   0   29.42    4.45
   6  10   0   27.86    4.08
  -6 -10   0   38.55    5.01
  -6 -10   0   30.42    3.97
  -6 -10   0   39.34    5.62
  -6  10   0   29.12    5.85
  -6  10   0   30.82    3.31
  -8 -10   0  686.56   32.20
  -8 -10   0  648.79   31.05
   8  10   0  686.25   32.41
   8  10   0  666.07   30.91
  -8 -10   0  688.83   29.86
  -8 -10   0  642.11   32.21
  -8 -10   0  670.06   31.07
   8  10   0  711.79   32.36
 -10 -10   0   40.07    5.10
  10  10   0   36.82    6.00
  10  10   0   36.42    6.11
 -10 -10   0   44.77    6.27
 -10 -10   0   48.82    5.80
 -10 -10   0   41.07    5.60
 -10  10   0   38.40    6.99
 -10 -10   0   33.20    5.27
  12  10   0  139.37    9.93
 -12 -10   0  139.78   10.50
 -12 -10   0  144.80    9.51
 -12 -10   0  135.62   10.85
  12  10   0  124.04   10.69
 -12  10   0  127.59   11.60
 -12 -10   0  134.47   10.00
 -12 -10   0  128.00    9.88
  12  10   0  143.58   10.82
 -14 -10   0   23.80    6.15
 -14  10   0   35.60    6.62
  14  10   0   29.23    5.42
  14  10   0   35.41    3.89
 -14 -10   0   35.69    5.88
 -14 -10   0   21.55    4.76
  14  10   0   24.46    6.20
 -14 -10   0   42.77    6.10
  14  10   0   31.84    6.33
 -14 -10   0   35.18    6.16
 -16 -10   0  138.49   12.24
 -16 -10   0  169.38   11.37
 -16 -10   0  176.80   12.55
  16  10   0  179.73   12.24
 -16  10   0  163.68   13.60
 -16 -10   0  170.63   12.33
  16  10   0  169.09    9.86
 -16 -10   0  173.55   12.79
  16  10   0  168.51   13.21
  16  10   0  172.05   13.00
  18  10   0    1.92    5.22
 -18 -10   0   -1.98    4.79
  18  10   0    7.05    4.32
  18  10   0    2.93    3.67
 -18 -10   0    3.51    4.91
 -18 -10   0    5.72    4.96
 -18  10   0   -1.67    5.13
  18  10   0    1.32    5.43
 -18  10   0   -0.80    2.50
  20 -10   0  334.70   15.93
  20  10   0  339.16   20.23
  20  10   0  336.96   17.71
  20 -10   0  357.66   16.15
 -20  10   0  331.20   16.13
 -20 -10   0  338.41   20.30
 -20  10   0  327.60   21.49
 -20 -10   0  343.28   20.53
 -20 -10   0  338.40   21.04
  20  10   0  388.12   21.86
  20  10   0  317.84   21.00
 -20  10   0  317.00   16.09
  22  10   0   16.26    5.01
  22  10   0   14.93    6.68
  22 -10   0   12.72    4.02
 -22  10   0    5.41    6.40
 -22 -10   0   16.64    6.70
  22  10   0   14.74    5.89
  22  10   0    7.96    6.57
 -22  10   0   18.19    3.88
  22 -10   0   11.93    3.20
 -22 -10   0    6.35    6.04
 -22  10   0   13.12    3.58
  24  10   0  464.31   27.08
 -24 -10   0  469.75   26.48
 -24  10   0  419.03   26.76
 -24  10   0  465.55   22.07
  24 -10   0  442.09   21.85
  24  10   0  431.12   25.84
 -24  10   0  484.49   22.23
 -24 -10   0  456.46   26.94
  24  10   0  472.14   27.36
  24  10   0  458.79   23.41
 -24 -10   0  476.48   26.40
  24 -10   0  451.58   21.94
 -26 -10   0    4.05    6.37
 -26  10   0    8.42    7.04
  26  10   0    2.21    4.86
 -26  10   0    5.35    4.23
  26  10   0   10.05    7.29
 -26 -10   0    3.46    6.26
  26 -10   0    6.26    3.54
  26 -10   0    5.07    4.45
  26  10   0    5.59    7.15
 -26  10   0    6.85    4.12
 -26 -10   0   16.62    7.17
  26  10   0    4.48    5.44
  28  10   0  207.72   14.08
  28  10   0  213.79   17.27
 -28  10   0  194.81   12.45
  28 -10   0  194.19   12.31
 -28  10   0  217.77   17.35
  28 -10   0  194.77   12.61
 -28  10   0  184.42   12.36
  28  10   0  188.15   15.60
 -28 -10   0  229.21   16.87
  28  10   0  214.96   17.26
  30 -10   0  126.14    9.68
  30  10   0  137.12   13.05
 -30  10   0  117.27    9.65
 -30  10   0  128.97   13.57
  30 -10   0  126.95   10.11
 -30  10   0  123.04    9.72
  30  10   0  142.03   14.25
  30  10   0  112.49   13.28
 -30 -10   0  139.63   13.71
  30  10   0  121.15   10.84
 -32  10   0   58.34    9.78
  32  10   0   44.51    8.59
 -32  10   0   47.65    6.70
 -32  10   0   48.52    6.72
  32  10   0   49.88    7.56
  32 -10   0   46.74    6.37
 -32 -10   0   44.89    9.22
  34  10   0   11.79    5.83
 -34 -10   0    9.47    7.18
  34  10   0   13.41    6.62
  34 -10   0   16.15    5.01
 -34  10   0   18.89    5.11
 -34  10   0   24.68    7.92
 -34  10   0   18.08    5.38
 -36 -10   0   94.24   12.40
 -36  10   0  101.09    9.56
 -36  10   0   95.56    9.57
  36  10   0  109.07   12.70
  36 -10   0  100.32    9.57
  36  10   0   97.78   10.38
 -36  10   0   98.10   12.43
  38  10   0   -1.62    5.38
 -38 -10   0   -0.88    6.31
  38 -10   0   -5.20    4.20
 -38  10   0   -4.44    4.94
 -38  10   0    2.52    5.03
  38  10   0   -2.80    6.09
 -38  10   0   12.51    7.20
  40 -10   0   96.36    9.84
 -40 -10   0   82.48   12.67
 -40  10   0   71.77    9.06
 -40  10   0   84.37    9.68
 -40  10   0   89.03   12.51
  40  10   0   93.01   12.46
 -42  10   0    2.19    5.58
 -42  10   0    4.45    7.09
  42 -10   0   -1.11    4.92
 -42  10   0   -3.02    5.57
  42  10   0    8.29    7.44
 -42 -10   0   -4.18    6.69
 -44 -10   0   27.33    9.39
  44  10   0   51.97   10.74
 -44  10   0   46.26    8.41
 -44  10   0   48.98    8.52
 -44  10   0   34.04    9.37
  44 -10   0   28.33    6.76
   1 -11   0   13.98    3.25
  -1  11   0   25.88    4.22
   1 -11   0    9.48    3.61
  -1 -11   0   13.09    4.09
   1  11   0   20.02    4.26
  -1  11   0   18.79    3.82
  -1 -11   0   23.63    3.92
   1  11   0   14.91    4.00
  -3 -11   0    4.81    2.53
   3 -11   0    9.23    3.23
   3  11   0    7.46    3.73
   3 -11   0   12.27    2.85
  -3 -11   0    1.29    2.89
  -3 -11   0    9.03    4.15
  -3  11   0    5.59    3.08
   3  11   0   -2.16    3.53
  -3  11   0    8.69    3.15
   5  11   0    3.28    3.59
   5 -11   0   -0.81    2.07
   5  11   0   -2.36    3.84
  -5  11   0    3.01    2.75
  -5  11   0    2.05    5.28
  -5 -11   0    1.32    3.81
  -5 -11   0   -0.31    3.00
   5  11   0   -1.08    2.62
  -5 -11   0   -5.01    2.93
  -5 -11   0    2.54    2.68
  -5  11   0    1.04    2.54
   5 -11   0   -2.22    2.32
  -7 -11   0   15.25    4.22
  -7 -11   0    9.39    3.92
  -7  11   0    9.68    5.43
  -7  11   0    8.49    2.66
   7  11   0    4.74    4.36
   7  11   0   16.18    4.85
  -7 -11   0   11.71    4.78
  -7 -11   0   17.05    4.01
  -7 -11   0    4.96    3.19
   7  11   0   14.36    3.64
  -7  11   0    6.87    2.51
  -9 -11   0    2.72    3.61
   9  11   0   -6.58    3.41
  -9 -11   0   -5.88    3.87
  -9 -11   0    3.07    3.21
  -9  11   0   -0.67    4.55
   9  11   0   -1.47    4.07
  -9 -11   0    3.85    3.77
  -9 -11   0   -3.21    3.33
   9  11   0   -1.74    3.04
 -11 -11   0    8.81    5.11
 -11 -11   0   11.07    4.46
  11  11   0   14.39    5.05
 -11 -11   0    9.58    4.06
 -11 -11   0   14.55    4.67
  11  11   0   20.84    5.62
 -11  11   0   19.51    6.29
 -11 -11   0   14.28    4.45
 -13  11   0    2.50    5.60
 -13 -11   0    4.98    4.62
  13  11   0    3.36    5.01
  13  11   0    1.31    3.84
 -13 -11   0   11.79    5.53
 -13 -11   0   -3.42    3.72
  13  11   0    5.26    5.17
 -13 -11   0   -2.24    3.79
 -13 -11   0    1.38    3.76
 -15 -11   0   19.70    5.56
  15  11   0   15.40    3.15
 -15 -11   0   20.49    5.05
 -15 -11   0   18.23    6.08
  15  11   0   14.19    4.86
  15  11   0   27.54    6.78
  15  11   0   22.82    6.45
 -15 -11   0   26.01    5.85
 -15  11   0   30.12    7.16
 -15 -11   0   29.75    5.96
  17  11   0   -0.09    5.47
 -17 -11   0   -1.20    4.75
  17  11   0   -2.69    5.21
 -17 -11   0   11.59    5.28
 -17 -11   0   -2.12    4.74
  17  11   0    7.44    3.29
 -17  11   0   14.98    6.34
  17  11   0   -6.10    3.91
 -17 -11   0    3.14    4.81
 -19 -11   0   27.19    6.87
 -19 -11   0   17.44    6.16
  19  11   0   14.25    4.13
 -19 -11   0   14.05    5.49
 -19  11   0   13.04    2.83
  19  11   0    6.43    4.82
 -19  11   0    8.70    6.00
  19  11   0    9.28    6.28
  19  11   0   16.48    6.70
  21  11   0    6.43    4.18
  21 -11   0   -2.02    2.41
 -21  11   0    4.39    3.26
 -21 -11   0   -4.50    4.71
 -21 -11   0   -3.71    5.72
 -21 -11   0   -7.69    5.59
 -21  11   0    2.54    5.63
  21  11   0   -1.03    6.04
 -21  11   0   -0.66    2.83
  21 -11   0   -1.16    3.04
  21  11   0   -1.00    4.30
  21  11   0   -2.29    5.88
 -23  11   0    7.98    3.70
 -23 -11   0   20.85    6.62
  23  11   0    6.51    4.78
 -23 -11   0    1.99    6.44
  23  11   0    9.32    6.71
  23 -11   0    0.15    3.61
  23  11   0   20.87    7.49
  23  11   0   12.09    5.65
 -23  11   0    8.55    6.72
 -23  11   0   12.55    3.85
  23 -11   0   11.78    3.25
 -23 -11   0    3.95    6.02
  25 -11   0   24.19    4.86
 -25 -11   0   18.62    7.01
 -25  11   0   27.23    4.77
 -25 -11   0   12.99    7.42
  25  11   0   26.59    6.85
 -25  11   0   35.96    8.55
 -25 -11   0   16.97    7.11
  25  11   0   28.53    8.15
  25  11   0   30.05    5.83
  25  11   0   19.87    7.55
  25 -11   0   30.02    4.31
 -25  11   0   20.24    4.55
  27 -11   0    1.94    4.24
  27  11   0    2.56    4.89
 -27  11   0   -5.60    6.12
 -27  11   0    2.50    4.07
  27  11   0   10.07    7.35
  27  11   0   -9.88    6.33
 -27 -11   0   17.53    7.38
 -27 -11   0   -0.56    5.93
 -27  11   0   -1.99    4.22
  27 -11   0    0.30    3.55
  27  11   0   -0.17    5.54
 -29  11   0   -0.51    6.30
  29  11   0   -4.31    6.19
 -29  11   0    1.03    3.88
 -29 -11   0    1.82    6.43
  29  11   0   -3.42    4.89
  29 -11   0   -1.01    3.59
  29  11   0   -5.31    4.68
  29 -11   0   -1.74    4.08
  29  11   0    0.53    6.54
 -29  11   0    5.04    4.29
 -31  11   0   17.14    4.82
  31  11   0   19.58    5.70
 -31  11   0   19.74    4.83
 -31 -11   0   12.25    6.95
  31 -11   0    5.93    4.12
 -31  11   0   12.93    7.42
  31  11   0   13.07    6.10
 -33  11   0   37.23    8.66
  33  11   0   23.39    6.14
 -33  11   0   31.21    5.66
 -33  11   0   23.01    5.26
  33 -11   0   30.14    5.52
  33  11   0   18.65    7.37
 -33 -11   0   27.50    7.91
 -35  11   0   -0.58    4.30
 -35  11   0    4.11    6.84
 -35  11   0   -1.61    4.74
 -35 -11   0    3.20    7.11
  35 -11   0   -2.60    4.05
  35  11   0    1.54    6.21
  35  11   0    3.20    5.24
 -37  11   0   34.74    9.43
 -37 -11   0   26.96    8.61
  37  11   0   27.26    8.37
  37  11   0   24.19    6.68
  37 -11   0   24.29    5.67
 -37  11   0   25.02    5.99
 -37  11   0   26.70    6.14
 -39  11   0    8.67    5.56
 -39 -11   0   17.35    8.65
  39  11   0   12.93    7.81
  39 -11   0    8.86    5.26
 -39  11   0   14.52    5.59
  39  11   0   13.34    6.28
 -39  11   0    9.81    7.40
  41 -11   0   28.16    6.16
  41  11   0   17.42    8.26
 -41  11   0   17.43    6.03
 -41  11   0   32.51    6.84
 -41  11   0   23.05    8.53
 -41 -11   0   21.65    8.63
   0 -12   0 1290.01   57.68
   0  12   0 1326.62   57.45
   0  12   0 1311.31   57.28
   0 -12   0 1382.58   57.70
  -2  12   0   27.42    4.53
  -2  12   0   32.86    4.90
   2 -12   0   34.05    4.84
   2 -12   0   37.81    4.58
  -2 -12   0   38.91    5.67
  -2 -12   0   35.79    4.96
   2  12   0   36.58    5.58
   2  12   0   27.05    5.19
   4  12   0  849.15   38.81
  -4 -12   0  784.11   38.58
  -4  12   0  859.01   36.88
   4 -12   0  809.56   36.81
  -4 -12   0  875.87   35.59
   4 -12   0  841.01   36.70
  -4  12   0  846.72   36.75
  -4 -12   0  872.75   38.77
   4  12   0  805.14   38.44
   6 -12   0  120.43    6.99
  -6 -12   0  131.41    8.09
  -6  12   0  118.03   11.64
   6  12   0  120.60    9.73
   6  12   0  110.67    7.46
  -6 -12   0  116.75    9.23
   6 -12   0  110.45    7.14
  -6 -12   0  135.56   10.08
  -6  12   0  107.46    7.17
   6  12   0  110.91    9.45
  -6  12   0  113.97    7.29
   8  12   0  374.50   20.79
  -8  12   0  370.35   23.15
  -8  12   0  383.89   17.47
  -8 -12   0  379.08   20.97
  -8  12   0  345.38   17.27
  -8 -12   0  403.67   20.96
   8  12   0  373.86   21.02
  -8 -12   0  414.90   19.02
   8  12   0  388.23   19.10
  10  12   0   13.68    5.39
 -10 -12   0   18.03    5.76
 -10 -12   0    6.57    3.94
 -10 -12   0   19.89    5.08
  10  12   0   14.80    5.67
  10  12   0   13.44    4.42
 -10  12   0   21.18    6.43
 -10 -12   0   16.80    4.78
 -12 -12   0  393.14   23.20
  12  12   0  419.38   23.35
  12  12   0  401.56   23.27
 -12 -12   0  428.53   21.98
 -12  12   0  352.62   24.05
 -12 -12   0  435.80   21.22
 -12 -12   0  456.57   23.36
 -14 -12   0   -3.52    4.23
 -14 -12   0    1.53    4.46
 -14 -12   0    0.44    4.05
 -14 -12   0   -9.54    5.04
 -14 -12   0    1.76    4.52
  14  12   0    1.18    5.30
  14  12   0   -2.66    5.22
 -14  12   0    5.63    6.22
 -16 -12   0  670.83   32.59
 -16 -12   0  627.86   32.11
  16  12   0  639.66   33.78
 -16 -12   0  691.31   33.96
 -16 -12   0  642.09   31.06
 -16  12   0  610.37   34.84
 -16 -12   0  624.94   33.52
  16  12   0  667.50   32.39
  16  12   0  636.91   33.52
 -18 -12   0   35.11    7.15
 -18 -12   0   46.34    7.79
  18  12   0   35.39    4.33
 -18 -12   0   29.43    7.41
  18  12   0   44.26    7.19
 -18 -12   0   39.27    7.08
 -18  12   0   35.84    8.62
  18  12   0   21.80    7.30
  18  12   0   36.09    7.78
  20  12   0  561.65   31.31
 -20 -12   0  503.96   30.74
 -20 -12   0  575.98   30.11
  20  12   0  571.80   25.99
  20  12   0  567.98   30.08
  20  12   0  610.27   32.13
 -20  12   0  572.97   32.63
 -20 -12   0  579.93   30.27
  22 -12   0   -3.86    2.38
  22  12   0   -1.97    4.99
 -22 -12   0   -0.86    5.36
 -22  12   0    2.07    3.10
  22  12   0    6.72    6.51
 -22  12   0    0.49    6.63
 -22 -12   0   -2.48    5.99
  22  12   0    3.28    4.30
 -22 -12   0   -1.23    6.07
 -22  12   0    0.77    2.98
  22  12   0    5.15    6.81
  24  12   0  697.28   36.68
 -24 -12   0  690.92   35.38
 -24  12   0  671.33   37.29
 -24  12   0  644.74   29.68
  24 -12   0  651.80   29.81
  24  12   0  641.12   34.76
  24 -12   0  672.94   29.98
 -24  12   0  660.72   29.79
  24  12   0  656.83   30.99
 -26  12   0   43.44    8.91
 -26 -12   0   16.55    6.95
 -26  12   0   31.20    4.78
 -26 -12   0   30.43    8.02
  26 -12   0   40.50    5.56
  26  12   0   21.41    6.74
  26  12   0   26.00    8.45
  26 -12   0   34.44    4.54
 -26  12   0   35.89    4.77
  26  12   0   42.94    6.23
  26  12   0   29.60    8.29
 -28  12   0  249.80   14.30
  28  12   0  266.56   18.89
 -28 -12   0  249.35   19.45
  28 -12   0  249.54   14.38
 -28  12   0  279.93   14.65
  28  12   0  249.72   15.84
  28 -12   0  268.58   14.83
  28  12   0  256.78   19.86
 -28  12   0  279.36   20.72
  30  12   0    2.32    5.43
 -30  12   0    1.87    6.42
 -30 -12   0   -2.22    6.26
 -30  12   0    7.16    4.07
  30  12   0   10.48    5.17
  30 -12   0   -0.31    3.47
 -30  12   0   10.83    3.89
 -32 -12   0   75.32   11.08
 -32  12   0   80.69    7.72
 -32  12   0   64.91    7.27
  32  12   0   74.01    8.66
 -32  12   0   82.98   11.91
  32  12   0   90.12   11.14
  32 -12   0   81.10    7.58
 -34  12   0   -5.82    4.12
 -34 -12   0   14.82    7.43
  34  12   0   -4.46    4.73
 -34  12   0    8.14    7.19
 -34  12   0   -2.79    3.99
  34  12   0   -1.86    5.95
  34 -12   0   -5.47    3.55
 -36  12   0  128.62   10.60
  36  12   0  137.30   12.11
 -36  12   0  156.04   16.02
  36  12   0  120.13   14.00
  36 -12   0  127.26   10.62
 -36 -12   0  147.22   15.52
 -36  12   0  122.81   10.75
 -38  12   0    2.13    5.23
 -38  12   0   18.55    7.96
 -38  12   0   11.38    4.97
  38  12   0   17.00    6.12
  38 -12   0   10.40    4.78
 -38 -12   0    7.08    8.10
 -40 -12   0  140.57   15.73
 -40  12   0  148.39   16.01
 -40  12   0  126.66   11.30
 -40  12   0  120.42   11.28
  40 -12   0  125.99   11.26
  40  12   0  135.74   12.87
   1 -13   0    2.19    3.33
   1 -13   0    8.38    3.90
  -1  13   0    6.27    3.93
  -1  13   0    6.79    4.12
   1  13   0   12.81    4.67
  -1 -13   0   13.67    3.90
  -1 -13   0   10.09    4.51
   1  13   0    5.76    4.32
  -3 -13   0   21.16    3.67
  -3 -13   0   12.59    5.12
   3  13   0   15.05    4.85
  -3  13   0   15.05    4.34
  -3 -13   0   23.48    4.79
  -3  13   0   20.65    4.46
   3 -13   0   20.27    4.41
   3 -13   0   23.05    4.00
   3  13   0   21.18    5.30
   5 -13   0   -2.67    2.71
   5  13   0    0.17    4.66
  -5  13   0    3.21    3.33
  -5 -13   0    1.30    4.53
  -5  13   0    5.24    3.36
  -5 -13   0    3.74    3.34
  -5 -13   0   -1.59    3.82
   5  13   0    1.39    4.66
   5 -13   0    1.69    3.21
  -7 -13   0   28.30    5.58
  -7 -13   0   29.47    4.98
   7  13   0   32.49    6.50
  -7  13   0   26.89    3.92
   7 -13   0   25.19    3.88
   7  13   0   22.88    5.77
  -7 -13   0   19.18    6.02
  -7  13   0   29.10    4.01
   7 -13   0   29.61    3.67
   7  13   0   25.69    4.21
  -7  13   0   28.62    7.95
  -9  13   0    1.05    2.74
  -9  13   0    0.48    3.12
   9  13   0   -1.53    3.68
  -9 -13   0    1.08    4.32
  -9  13   0    6.25    6.62
   9  13   0    6.43    5.38
  -9 -13   0   -2.36    4.78
   9  13   0   10.86    5.32
  -9 -13   0   12.36    4.30
  -9  13   0    3.66    2.92
  11  13   0   11.94    5.82
  11  13   0    3.85    5.30
 -11 -13   0    0.97    5.16
 -11 -13   0   -1.38    3.87
 -11  13   0    8.61    6.32
 -11 -13   0    4.02    4.50
  11  13   0    5.92    4.48
  13  13   0   17.02    6.65
 -13  13   0   20.10    6.84
 -13 -13   0   23.00    5.49
  13  13   0   24.05    6.82
 -13 -13   0   23.07    6.00
 -13 -13   0   19.30    6.54
  15  13   0   44.84    8.09
 -15 -13   0   41.93    6.57
 -15 -13   0   36.61    7.71
  15  13   0   44.27    8.04
 -15 -13   0   40.78    7.28
 -15  13   0   33.80    8.22
 -17  13   0    5.88    7.07
 -17 -13   0   12.55    6.24
 -17 -13   0   33.55    6.32
  17  13   0   31.39    7.72
  17  13   0   25.53    6.13
  17  13   0   30.39    7.57
 -17 -13   0   14.05    6.65
 -19 -13   0   -5.77    5.30
  19  13   0    1.34    6.07
 -19 -13   0   -5.26    5.63
  19  13   0   -4.25    4.81
 -19  13   0   -0.40    6.55
  19  13   0    1.26    6.55
  21  13   0    5.40    7.06
  21  13   0    1.11    6.02
 -21  13   0    7.37    6.98
  21  13   0   12.82    6.23
  21  13   0   10.42    3.73
 -21 -13   0    9.89    6.45
 -21 -13   0    1.41    6.27
  23  13   0   16.89    6.50
  23  13   0   22.49    7.78
 -23  13   0    2.20    6.81
 -23 -13   0    9.97    6.82
  23  13   0   11.78    4.19
  23  13   0    3.58    6.66
 -23 -13   0    8.56    6.52
  25 -13   0   10.39    3.07
  25  13   0    4.70    6.94
  25  13   0   11.63    4.42
  25 -13   0   11.94    3.94
  25  13   0   15.20    7.85
 -25  13   0    9.03    7.20
 -25 -13   0   13.12    6.91
 -25  13   0   11.13    3.52
  25  13   0   15.02    6.23
 -25  13   0    8.74    3.44
 -27  13   0    8.10    6.69
 -27  13   0    4.60    3.55
  27 -13   0    0.85    3.66
  27  13   0    8.18    5.82
  27  13   0    3.44    6.77
 -27 -13   0    8.51    6.80
  27 -13   0    3.57    3.20
  27  13   0    8.30    4.68
 -27  13   0    7.74    3.58
 -29  13   0    6.50    4.06
 -29 -13   0    8.06    7.09
  29  13   0   20.73    5.17
 -29  13   0    9.16    7.00
  29 -13   0   10.73    3.62
 -29  13   0    7.83    3.81
  29  13   0   24.60    7.12
 -31  13   0    6.87    7.05
 -31  13   0    5.65    3.88
 -31  13   0   -5.53    3.68
  31  13   0   -5.88    4.26
  31 -13   0    3.92    3.69
 -31 -13   0  -11.56    5.45
 -33 -13   0    5.19    7.26
 -33  13   0    4.67    6.93
  33  13   0    1.82    4.76
  33 -13   0    2.53    3.99
 -33  13   0    7.86    4.55
 -33  13   0    7.79    4.18
 -35 -13   0   17.51    8.45
 -35  13   0   28.28    5.63
 -35  13   0    2.71    7.39
  35  13   0   26.30    6.38
  35 -13   0   27.69    5.31
 -35  13   0   15.69    4.94
 -37 -13   0    6.46    7.87
 -37  13   0    3.54    7.15
  37  13   0   15.19    6.19
  37 -13   0    2.14    4.44
 -37  13   0   10.18    4.77
 -37  13   0    1.58    4.77
 -39  13   0   -4.01    4.40
 -39 -13   0    0.97    7.37
  39  13   0    6.79    5.95
 -39  13   0    1.80    4.66
 -39  13   0    4.08    7.72
  39 -13   0    8.93    4.99
   0 -14   0  201.11   12.04
   0  14   0  188.37   12.36
   0 -14   0  176.00   12.10
   0  14   0  200.20   12.42
  -2 -14   0   -5.84    4.08
   2 -14   0   -2.43    3.33
   2  14   0    3.47    4.42
  -2  14   0   -3.37    3.88
  -2  14   0    2.52    4.05
  -2 -14   0    2.59    2.96
   2  14   0    1.63    4.50
  -2 -14   0    1.84    3.92
   2 -14   0   -1.04    3.96
   4  14   0  209.63   13.97
  -4  14   0  209.85   12.46
  -4 -14   0  235.84   12.08
   4 -14   0  235.17   12.36
   4  14   0  221.42   14.35
  -4  14   0  223.77   12.55
  -4 -14   0  211.59   14.13
  -4 -14   0  209.11   13.70
   4 -14   0  203.20   12.40
   6  14   0   14.20    5.72
  -6  14   0    9.82    3.91
  -6 -14   0    7.38    4.66
   6 -14   0    6.34    3.49
  -6 -14   0   -5.10    4.67
   6  14   0   -2.88    4.62
  -6 -14   0   -0.28    3.81
   6 -14   0    3.98    3.09
  -6  14   0    5.09    3.41
  -8  14   0  192.97   10.71
   8 -14   0  192.77   10.45
   8  14   0  191.72   14.01
  -8 -14   0  207.21   13.67
  -8  14   0  194.80   10.87
  -8 -14   0  198.45   14.07
  -8 -14   0  200.67   12.04
   8  14   0  201.73   14.12
   8 -14   0  186.79   10.55
  -8  14   0  179.03   16.23
   8  14   0  202.01   11.34
 -10  14   0    0.29    3.09
 -10 -14   0    6.85    4.41
 -10 -14   0   -5.10    4.80
 -10  14   0   11.11    7.30
  10  14   0   -4.10    3.95
 -10 -14   0   -0.81    4.71
  10  14   0   12.51    5.75
  10  14   0   -0.49    5.24
 -12  14   0  201.87   17.17
 -12 -14   0  210.17   14.74
  12  14   0  188.66   14.89
 -12 -14   0  219.48   13.53
  12  14   0  213.51   13.22
  12  14   0  197.47   15.24
 -12 -14   0  202.73   15.12
 -14  14   0    4.54    7.00
  14  14   0    4.06    4.79
  14  14   0    8.92    6.46
 -14 -14   0    4.32    4.86
 -14 -14   0    8.91    6.39
  14  14   0   10.31    6.57
  16  14   0  353.94   22.11
 -16 -14   0  335.80   19.45
  16  14   0  344.37   21.86
 -16 -14   0  320.15   21.46
 -16  14   0  343.63   23.56
  18  14   0    2.01    6.27
 -18  14   0    3.64    6.57
 -18 -14   0    2.90    5.11
  18  14   0   -4.50    5.85
 -18 -14   0   -3.44    5.57
  18  14   0    0.04    4.79
 -20  14   0  137.62   14.30
  20  14   0  135.98   13.51
  20  14   0  130.74   13.43
 -20 -14   0  114.14   12.67
 -22  14   0   34.43    8.89
  22  14   0   36.05    8.70
 -22 -14   0   33.24    8.21
  22  14   0   27.59    8.07
  24  14   0  301.02   14.94
  24  14   0  294.29   21.17
 -24 -14   0  235.84   19.65
  24  14   0  283.80   20.89
 -24  14   0  299.40   22.13
 -26  14   0   19.47    3.68
  26  14   0   -3.25    6.62
 -26  14   0   19.68    7.94
  26  14   0   22.52    4.60
  26 -14   0   14.69    3.96
 -26  14   0   18.16    3.54
 -26 -14   0   10.41    7.18
  28 -14   0   29.98    4.05
  28  14   0   18.45    5.05
 -28  14   0   26.28    4.33
 -28 -14   0   27.09    8.30
 -28  14   0   18.54    3.88
 -28  14   0   57.52   10.41
 -30 -14   0    7.77    7.31
  30 -14   0    2.03    3.52
 -30  14   0   11.45    8.06
 -30  14   0    6.88    3.73
 -30  14   0   11.35    4.06
  30  14   0    3.91    4.70
 -32 -14   0   28.14    9.03
 -32  14   0   52.53    5.98
 -32  14   0   47.55   10.53
  32 -14   0   41.56    5.44
 -32  14   0   57.40    6.07
  32  14   0   52.12    7.03
 -34  14   0   -2.88    7.07
 -34  14   0    3.57    4.12
  34  14   0    7.34    5.29
 -34  14   0    6.08    4.13
  34 -14   0   -2.69    3.66
 -34 -14   0   -9.87    6.31
 -36  14   0   77.51    7.70
 -36  14   0   80.11   12.99
 -36  14   0   69.83    7.40
  36 -14   0   65.55    7.32
 -36 -14   0   66.00   11.69
  38 -14   0    4.56    4.37
 -38  14   0   -2.37    4.43
 -38 -14   0   11.67    8.58
 -38  14   0    6.48    4.92
 -38  14   0    5.25    8.08
   1  15   0   20.74    5.52
   1 -15   0   31.63    5.66
  -1 -15   0   37.39    5.79
   1  15   0   28.17    5.89
   1 -15   0   30.58    5.20
  -1 -15   0   27.51    5.92
  -1  15   0   40.67    6.05
  -1  15   0   34.99    5.84
   3  15   0    1.12    4.99
   3 -15   0    5.24    4.14
  -3  15   0    2.59    4.24
   3 -15   0    4.46    3.83
  -3  15   0    1.76    4.07
  -3 -15   0    7.44    4.47
   3  15   0   11.84    5.41
  -3 -15   0    5.32    4.90
  -5 -15   0   43.33    5.58
  -5 -15   0   36.36    6.65
   5  15   0   36.20    6.80
   5  15   0   43.24    7.05
  -5 -15   0   39.56    6.40
   5 -15   0   36.83    4.82
  -5  15   0   36.24    5.32
   5 -15   0   39.17    5.33
  -5  15   0   33.84    5.24
  -7 -15   0   16.62    5.42
   7  15   0   12.56    5.96
   7 -15   0   10.62    4.07
  -7  15   0   14.05    4.16
  -7 -15   0   17.08    4.85
   7  15   0   19.19    6.40
  -7 -15   0   26.40    6.28
  -7  15   0   13.95    4.31
   7 -15   0   22.04    3.89
   9  15   0   37.19    7.40
   9  15   0   39.93    5.23
  -9 -15   0   22.37    6.72
   9 -15   0   28.07    4.50
  -9  15   0   29.84    4.32
  -9  15   0   39.69    4.56
  -9 -15   0   44.14    6.17
   9  15   0   24.77    6.94
  -9  15   0   16.76    7.66
   9 -15   0   40.46    4.35
  11  15   0    7.97    5.99
 -11  15   0   16.31    8.18
  11  15   0    7.26    6.04
 -11 -15   0   21.43    6.73
 -11 -15   0   14.81    5.12
 -11  15   0   12.78    3.31
 -11  15   0   13.96    3.53
 -13  15   0   -0.07    7.47
  13  15   0    4.56    6.13
 -13 -15   0  -10.18    5.45
  13  15   0    9.76    6.05
 -13 -15   0    6.33    5.01
 -15 -15   0   29.43    7.41
  15  15   0   28.96    7.49
 -15  15   0   37.22    9.28
  15  15   0   18.80    7.42
 -15 -15   0   30.96    6.27
 -17 -15   0   -0.67    4.89
 -17 -15   0    8.38    6.57
  17  15   0   -3.30    5.62
  17  15   0   -1.72    5.62
 -17  15   0    5.83    7.20
  19  15   0   -4.78    5.54
 -19  15   0   -2.99    6.44
 -19 -15   0    1.65    5.94
  19  15   0    7.61    6.44
  21  15   0   12.64    6.69
  21  15   0   15.28    6.94
 -21  15   0    4.81    6.72
 -21 -15   0   -1.34    5.93
 -23  15   0   -2.41    6.04
 -23 -15   0   -2.21    5.91
  23  15   0    5.39    6.25
  23  15   0   -4.81    6.16
 -25 -15   0   13.15    7.19
 -25  15   0    5.12    7.18
 -27 -15   0    4.66    6.88
  27  15   0    3.13    3.82
 -27  15   0    5.06    6.97
  27 -15   0    3.89    2.90
 -29  15   0    1.72    3.38
 -29  15   0   11.39    7.55
  29 -15   0    3.56    3.14
 -29 -15   0   -3.47    6.36
 -29  15   0    2.78    3.35
 -31  15   0    4.98    3.74
 -31  15   0    8.11    7.61
 -31  15   0   12.34    3.99
  31 -15   0    8.15    3.47
 -31 -15   0    7.75    7.67
 -33  15   0    0.73    3.83
 -33  15   0   -0.61    7.28
 -33  15   0    4.70    4.04
 -33 -15   0  -18.16    6.35
  33 -15   0   -2.48    3.41
 -35  15   0    2.76    4.16
 -35  15   0    9.76    7.91
 -35 -15   0    3.27    7.67
  35 -15   0    0.40    3.68
 -35  15   0   -0.87    3.79
   0 -16   0   -0.19    4.56
   0 -16   0    2.45    4.24
   0  16   0   -5.68    4.37
   0  16   0    3.71    4.68
  -2  16   0   -5.41    4.25
  -2  16   0    4.99    4.63
   2 -16   0   -6.54    3.54
   2 -16   0    0.89    4.24
   2  16   0   -0.61    4.91
  -2 -16   0   -5.75    4.65
   2  16   0   -1.33    4.94
  -4 -16   0   15.52    5.82
   4 -16   0   10.60    4.01
   4  16   0   18.60    5.95
  -4  16   0    1.13    4.23
  -4  16   0    7.05    4.44
   4  16   0    3.09    5.34
   4 -16   0    3.27    4.37
  -6  16   0   22.42    4.56
  -6 -16   0   12.55    6.11
   6  16   0   14.54    6.15
  -6  16   0   18.74    4.81
   6  16   0   18.11    6.28
   6 -16   0   20.70    4.18
   6 -16   0   21.70    4.73
  -8  16   0   31.18    5.13
  -8 -16   0   41.28    7.51
   8 -16   0   38.24    4.67
   8 -16   0   36.89    4.92
   8  16   0   33.93    7.41
  -8  16   0   42.08    5.04
   8  16   0   42.88    7.79
  -8  16   0   39.93    5.04
 -10  16   0   20.20    3.95
  10 -16   0   19.76    3.96
  10  16   0   11.73    6.11
 -10 -16   0   12.46    6.29
 -10  16   0   19.79    3.72
  10 -16   0   18.00    3.50
  10  16   0   20.84    6.73
  12  16   0    3.13    5.82
 -12 -16   0    7.17    4.87
  12  16   0    8.69    5.89
 -12  16   0   -8.77    6.00
  12 -16   0   -5.61    2.71
 -12 -16   0   -0.87    5.65
  14  16   0    0.40    5.26
  14  16   0    8.17    6.17
 -14  16   0    3.74    6.85
 -14 -16   0   11.49    5.37
 -14 -16   0   11.41    6.83
 -16 -16   0   66.16    9.61
  16  16   0   62.53    9.60
  16  16   0   60.87    9.41
 -16 -16   0   61.73    8.03
 -16  16   0   65.68   11.23
  18  16   0    2.11    6.31
 -18 -16   0   -3.27    4.72
 -18  16   0    9.50    6.95
 -18 -16   0   -2.56    5.93
  18  16   0    7.95    6.73
  20  16   0   26.02    7.91
 -20  16   0   40.38    9.12
  20  16   0   34.24    8.20
 -20 -16   0   23.21    7.77
 -22 -16   0    4.64    6.51
 -22  16   0   -0.51    6.58
  22  16   0    5.90    6.39
  22  16   0    1.40    6.40
 -24 -16   0   65.35   10.57
 -24  16   0   70.24   11.78
 -26  16   0   -2.68    6.62
 -26 -16   0   -0.93    6.45
 -28  16   0   42.84   10.50
 -28 -16   0   46.52    9.91
 -30  16   0    1.27    7.35
  30 -16   0    1.36    3.21
 -30 -16   0    6.22    7.72
 -32  16   0   18.81    8.65
 -32 -16   0   11.90    8.57
  32 -16   0   33.84    4.68
  -1 -17   0    6.01    5.13
   1 -17   0   14.48    4.97
   1  17   0    8.84    4.96
  -1  17   0    6.16    5.00
   1  17   0   12.40    5.11
  -1  17   0   15.03    5.00
   3 -17   0   -8.05    3.54
  -3 -17   0    3.72    4.88
   3  17   0    2.76    4.70
  -3  17   0    4.75    4.28
   3  17   0  -11.89    4.24
  -3  17   0    2.37    4.48
   5  17   0   -0.92    4.86
  -5 -17   0    0.48    4.65
   5 -17   0    2.68    3.86
  -5  17   0    9.12    4.16
   5  17   0    1.11    5.13
  -5  17   0   -5.28    3.88
   7  17   0   -6.56    4.67
   7 -17   0   -2.10    3.39
   7 -17   0    2.52    3.38
  -7  17   0    2.32    3.92
  -7 -17   0    0.81    5.00
  -7  17   0    4.09    3.68
  -7  17   0    1.54    3.87
   7  17   0   -7.03    4.62
   9  17   0   16.52    6.18
   9 -17   0    2.38    3.47
  -9  17   0    4.99    3.62
   9 -17   0    0.09    3.13
  -9  17   0    1.84    3.37
  -9 -17   0    3.45    5.42
   9  17   0    6.33    5.74
  11 -17   0    5.27    2.94
 -11 -17   0    0.67    5.48
 -11  17   0   -4.56    2.95
 -11  17   0    1.75    3.13
  11 -17   0    4.06    3.14
  11  17   0   -6.04    4.97
  11  17   0    1.17    5.37
 -13 -17   0    9.02    5.63
  13  17   0    5.18    5.99
  13  17   0   -2.56    5.46
  15  17   0   21.17    7.14
 -15 -17   0   18.87    7.10
  15  17   0   28.52    7.72
 -15  17   0   15.73    7.78
 -17  17   0   13.38    7.67
 -17 -17   0   24.31    6.22
  17  17   0   30.79    8.02
 -17 -17   0   17.16    6.83
  17  17   0   10.91    6.83
 -19 -17   0   -3.65    6.00
 -19  17   0    4.94    6.97
  19  17   0   12.45    6.95
  19  17   0   -1.58    6.30
 -21 -17   0   12.31    7.14
 -21  17   0   25.85    8.92
  21  17   0   27.47    8.45
  21  17   0   29.22    8.64
 -23  17   0   17.50    8.10
 -23 -17   0   -1.17    6.41
 -25 -17   0    3.37    6.76
 -25  17   0    2.63    7.11
 -27 -17   0   13.34    7.79
 -27  17   0    1.23    7.53
 -29 -17   0   -4.17    6.75
 -29  17   0    7.82    8.16
   0 -18   0    0.75    4.48
   0  18   0    3.82    4.78
   0  18   0  -12.88    3.96
   2  18   0   21.01    5.93
  -2  18   0   30.10    5.70
   2 -18   0   31.56    5.99
   2  18   0   28.97    6.40
  -2  18   0   30.98    6.22
  -2 -18   0   24.80    6.32
  -4  18   0   -3.96    4.00
   4 -18   0    3.61    4.04
   4  18   0   -0.50    4.85
   4  18   0    1.15    5.02
  -4  18   0    8.57    4.68
  -4 -18   0   -7.34    4.52
  -6  18   0   36.91    5.37
  -6  18   0   31.53    5.32
  -6  18   0   27.53    5.57
   6 -18   0   24.18    5.17
  -6 -18   0   29.55    6.95
   6  18   0   31.33    6.80
   6  18   0   26.25    6.74
   8  18   0   -2.95    4.98
   8 -18   0   -3.56    3.54
  -8  18   0    1.60    3.68
  -8 -18   0   -1.41    4.96
  -8  18   0   -6.10    3.51
   8  18   0    4.80    5.90
  10  18   0    0.00    5.55
 -10  18   0   -0.43    3.31
 -10 -18   0    4.32    5.27
  10 -18   0   -4.66    3.10
 -10  18   0   -1.61    3.66
  10  18   0    0.81    5.77
  12  18   0    5.22    6.00
  12 -18   0    0.52    2.97
  12  18   0   -2.30    5.67
 -12 -18   0   -1.69    5.51
 -12  18   0   -1.91    3.21
  14  18   0    9.92    6.66
 -14 -18   0   10.72    6.52
  14  18   0   -3.46    5.90
 -16 -18   0    0.23    6.07
  16  18   0    0.95    6.43
  16  18   0    7.26    6.31
 -16  18   0    6.95    7.70
 -18 -18   0    0.20    6.54
  18  18   0   -9.64    5.43
  18  18   0    3.70    6.72
 -18  18   0    0.01    7.71
  20  18   0   -2.72    6.78
 -20 -18   0    5.74    7.22
  20  18   0   -3.90    6.06
 -20  18   0   -2.33    7.04
 -22 -18   0   -0.82    6.15
 -22  18   0   -2.18    6.87
 -24  18   0    8.45    8.06
 -24 -18   0    1.49    6.97
 -26  18   0   -1.32    7.40
 -26 -18   0  -13.39    6.17
   1  19   0   10.63    5.44
  -1 -19   0   -2.58    4.58
   1 -19   0    5.08    4.76
   1  19   0   15.03    5.45
  -1  19   0   13.32    5.33
  -1  19   0   -4.70    4.56
   3  19   0    8.40    5.64
  -3  19   0    9.79    5.14
   3  19   0   19.96    6.22
  -3 -19   0   -0.49    4.90
  -3  19   0    5.87    5.00
   3 -19   0    1.96    4.38
   5  19   0    6.13    5.72
   5  19   0    3.31    5.43
  -5  19   0    7.68    4.57
  -5  19   0    7.57    4.86
  -5  19   0   10.49    4.70
  -5 -19   0    9.28    5.71
   5 -19   0   16.74    5.15
   7  19   0   -2.51    5.18
  -7  19   0   -5.00    4.00
  -7 -19   0   -4.92    5.01
  -7  19   0   -2.01    3.99
   7 -19   0    4.53    3.96
   7  19   0    4.00    5.66
  -9  19   0    8.14    4.29
   9  19   0   -3.85    5.80
   9 -19   0   -2.54    3.55
  -9  19   0   -4.13    3.41
   9  19   0   -3.26    5.42
  -9 -19   0    4.37    5.67
  11  19   0   21.05    7.28
  11  19   0   19.25    6.57
 -11 -19   0   16.56    6.59
 -11  19   0   12.62    3.79
  11 -19   0   11.65    4.01
 -11  19   0    6.99    3.86
 -13 -19   0  -12.37    4.95
  13 -19   0    1.62    2.80
  13  19   0   -8.98    5.25
  13  19   0  -11.51    5.32
  15  19   0    9.57    6.76
  15  19   0    2.21    6.45
 -15 -19   0   15.32    6.88
  17  19   0    0.62    6.47
 -17 -19   0   -0.79    6.24
  17  19   0    5.30    6.93
  19  19   0   10.00    6.93
 -19 -19   0    0.50    6.61
 -21 -19   0    0.95    7.03
 -21  19   0   -7.42    6.54
 -23 -19   0    2.04    7.09
 -23  19   0    0.87    8.24
   0 -20   0   94.78    9.75
   0  20   0   93.09    9.89
   0  20   0  113.28   10.57
  -2  20   0   18.47    5.59
  -2  20   0   14.09    5.83
   2  20   0   20.53    6.66
   2  20   0   15.99    6.21
  -2  20   0   18.34    5.72
   2 -20   0   22.40    6.07
  -2 -20   0    0.73    5.37
   4  20   0   17.91    6.26
  -4  20   0   24.65    5.49
  -4  20   0    8.95    5.44
   4 -20   0   23.82    5.83
  -4 -20   0   29.03    6.83
  -4  20   0   30.45    6.34
   4  20   0   41.02    7.60
  -6  20   0    0.71    4.40
  -6 -20   0   10.18    5.85
   6 -20   0   -1.88    4.14
  -6  20   0    0.46    4.17
   6  20   0    2.44    5.79
   6  20   0    0.63    5.85
  -8  20   0   69.14    6.93
  -8  20   0   76.45    7.27
   8  20   0   69.87    9.49
  -8 -20   0   71.22    9.78
   8  20   0   55.24    9.25
   8 -20   0   67.67    7.08
  10 -20   0    4.92    3.90
  10  20   0    4.24    5.93
  10  20   0    7.32    6.57
 -10 -20   0    2.13    6.15
 -10  20   0    1.92    3.70
 -10  20   0    2.06    3.95
  12  20   0   22.36    7.50
  12  20   0   32.93    8.47
 -12 -20   0   34.51    8.30
  12 -20   0   28.00    4.31
 -12  20   0   32.52    4.55
 -12  20   0   26.39    4.38
  14  20   0   -2.33    6.23
  14 -20   0    4.05    3.12
  14  20   0   -2.55    5.88
 -14 -20   0    9.98    6.85
  16  20   0   24.35    7.95
 -16 -20   0   23.47    8.10
  16  20   0   18.32    7.60
 -18 -20   0   -1.69    6.76
   1  21   0    2.02    5.28
  -1  21   0   -2.29    4.74
   1 -21   0    3.89    5.02
  -1  21   0    3.92    5.48
  -1 -21   0   -6.75    4.54
  -1  21   0    3.87    5.44
   1  21   0   -4.77    5.23
  -3  21   0    7.94    4.83
   3  21   0   -2.06    5.68
  -3  21   0   -2.53    4.79
  -3 -21   0   10.46    5.74
   3  21   0    7.24    6.21
   3 -21   0   -6.63    4.31
  -3  21   0   -3.04    4.67
   5  21   0    4.43    6.20
  -5 -21   0   -1.56    5.07
  -5  21   0    8.30    4.85
   5  21   0    1.71    5.87
  -5  21   0    1.77    4.72
   5 -21   0   -0.48    4.28
   7 -21   0   -0.80    3.88
  -7  21   0   -3.71    3.83
   7  21   0    0.35    5.66
  -7 -21   0   -3.38    5.40
  -7  21   0    1.11    4.45
   7  21   0   -1.62    5.87
  -9  21   0   -3.63    4.08
   9  21   0    0.65    5.83
  -9 -21   0   -3.92    5.56
   9  21   0   -3.83    5.95
  -9  21   0    2.38    3.93
   9 -21   0   -4.17    3.38
 -11  21   0   -1.17    3.55
  11  21   0  -10.07    5.53
  11  21   0    2.74    6.70
 -11  21   0   -3.27    3.88
  11 -21   0   -3.69    3.34
 -11 -21   0    6.79    6.47
 -50   0   1   -0.95    5.74
  50   0  -1    8.83    7.53
 -48   0   1   -2.43    5.62
  48   0  -1    6.43    6.72
 -46   0   1    0.41    6.30
  46   0  -1    6.42    6.22
  44   0  -1    0.63    5.71
 -44   0   1   11.88    6.84
 -42   0   1    3.12    6.52
  42   0  -1   -1.33    5.45
 -42   0   1    2.15    6.49
 -42   0   1   15.23    6.38
 -40   0   1    8.66    6.69
 -40   0   1    3.24    6.18
  40   0  -1    2.39    5.82
 -40   0   1   -2.60    5.50
 -38   0   1    1.56    6.83
 -38   0   1    5.30    6.70
 -38   0   1   -6.90    5.37
 -38   0   1   -5.62    5.91
  38   0  -1    1.62    5.79
  38   0  -1   -6.06    5.84
  36   0  -1   -0.23    5.65
 -36   0   1   -6.66    5.43
 -36   0   1   -2.49    6.53
 -36   0   1   -3.50    5.84
 -36   0   1   -1.46    5.94
  36   0  -1   -1.34    5.80
  36   0  -1   -0.51    6.14
 -34   0   1    0.57    5.21
  34   0  -1    3.61    5.75
  34   0  -1    5.10    6.10
 -34   0   1    6.30    6.46
 -34   0   1   -7.50    5.24
  34   0  -1   -2.90    4.80
 -34   0   1    3.29    5.99
 -32   0   1    1.17    5.31
  32   0  -1    0.71    5.06
 -32   0   1   -1.46    5.89
 -32   0   1    2.43    5.22
  32   0  -1    0.40    5.37
 -32   0   1   -0.80    6.27
  32   0  -1    2.73    5.40
  30   0  -1    4.52    5.87
  30   0  -1    0.29    5.05
 -30   0   1    1.22    5.45
 -30   0   1   -3.14    5.92
  30   0  -1    1.23    5.09
 -30   0   1    4.05    5.23
 -30   0   1   -6.52    4.08
  30   0  -1   -0.68    5.00
  28   0  -1    2.95    4.65
  28   0  -1   -5.33    4.39
  28   0  -1   -3.24    4.91
 -28   0   1    3.73    5.62
  28   0  -1   -0.21    4.31
 -28   0   1    2.11    4.32
 -28   0   1    1.93    4.78
 -28   0   1   -0.45    4.57
 -26   0   1    5.46    4.28
 -26   0   1   -0.49    5.22
  26   0  -1    5.79    4.92
  26   0  -1    3.23    4.03
 -26   0   1   -5.28    3.66
 -26   0   1   -0.13    4.58
  26   0  -1    6.74    4.46
  26   0  -1   -6.38    3.97
 -24   0   1   -3.22    3.76
  24   0  -1    3.24    4.05
  24   0  -1    0.14    4.40
 -24   0   1   -5.56    4.00
  24   0  -1   -1.32    3.96
 -24   0   1    3.70    4.61
 -24   0   1    0.17    4.64
  24   0  -1    0.38    4.07
  22   0  -1    2.50    4.15
 -22   0   1   -1.94    3.53
 -22   0   1   -4.87    3.85
  22   0  -1    3.51    3.90
 -22   0   1   -1.55    3.95
  22   0  -1    2.08    3.91
  22   0  -1   -3.51    3.52
  20   0  -1    2.10    4.14
  20   0  -1   -1.21    3.60
 -20   0   1   -6.16    3.45
  20   0  -1   -9.17    3.11
 -20   0   1   -3.41    3.32
  20   0  -1    3.19    3.54
 -20   0   1   -3.07    3.43
 -18   0   1    4.05    3.48
  18   0  -1   -1.12    3.29
  18   0  -1   -0.96    3.23
  18   0  -1   -1.91    3.20
 -18   0   1   -3.22    3.10
  18   0  -1   -0.45    3.66
 -18   0   1   -0.45    3.59
 -16   0   1    2.91    3.52
  16   0  -1   -2.53    2.76
  16   0  -1   -3.21    3.64
 -16   0   1    2.21    3.65
 -16   0   1   -4.35    3.20
  16   0  -1   -6.79    3.02
  16   0  -1   -1.34    3.30
  14   0  -1    1.49    3.31
 -14   0   1   -4.63    3.25
  14   0  -1    2.08    3.49
 -14   0   1    2.58    3.41
 -14   0   1    2.22    3.47
  14   0  -1    1.26    2.72
  14   0  -1    3.59    3.52
 -14   0   1   -2.08    2.84
 -12   0   1   -1.19    3.06
  12   0  -1    0.54    3.69
  12   0  -1    0.95    3.51
 -12   0   1   -3.32    3.16
 -12   0   1   -4.01    3.44
 -12   0   1   -0.11    3.36
  12   0  -1   -1.29    3.28
  12   0  -1   -2.38    3.46
 -10   0   1    2.18    3.11
 -10   0   1    0.05    2.99
 -10   0   1   -0.51    2.52
  10   0  -1    1.39    2.94
  10   0  -1    0.89    3.06
 -10   0   1    0.52    2.97
  10   0  -1    0.82    3.00
  10   0  -1    0.69    2.54
   8   0  -1    2.47    1.81
  -8   0   1    3.97    2.12
  -8   0   1    0.52    1.72
  -8   0   1   -0.48    1.87
   8   0  -1   -1.30    1.96
  -8   0   1   -0.29    1.91
   8   0  -1   -0.26    1.74
   8   0  -1   -2.66    1.81
   6   0  -1    0.33    1.20
   6   0  -1   -1.09    1.23
   6   0  -1    1.17    0.86
  -6   0   1    1.88    1.02
  -6   0   1   -1.70    1.13
  -6   0   1    0.10    1.26
  -6   0   1    0.07    0.81
   6   0  -1   -2.15    1.20
   4   0  -1    0.46    0.56
   4   0  -1    0.53    0.74
   4   0  -1    0.04    0.61
  -4   0   1    0.28    0.65
  -4   0   1   -0.80    0.62
   4   0  -1    0.47    0.76
   4   0  -1   -0.25    0.49
  -4   0   1   -0.60    0.61
  -2   0   1    0.32    0.45
   2   0  -1    0.05    0.51
   2   0  -1    0.37    0.40
  -2   0   1   -0.03    0.44
   0   0  -1    0.12    0.29
   0   0  -1    0.08    0.33
   0   0   1    0.13    0.39
   0   0  -1    0.55    0.51
   0   0   1    0.00    0.41
   2   0   1    0.13    0.59
   2   0   1    1.02    0.60
   2   0   1   -1.01    0.37
  -2   0  -1   -0.08    0.46
  -2   0  -1    0.21    0.39
  -2   0  -1   -0.16    0.57
   2   0   1    0.24    0.48
   4   0   1   -0.77    0.68
  -4   0  -1   -1.02    0.64
  -4   0  -1   -0.59    0.47
  -4   0  -1   -1.29    0.78
   4   0   1   -1.12    1.03
   4   0   1   -1.55    0.94
  -4   0  -1   -1.59    0.77
   4   0   1   -0.59    0.64
  -4   0  -1   -1.02    0.84
  -4   0  -1    1.38    0.97
   4   0   1   -1.80    1.10
   6   0   1    1.41    1.89
  -6   0  -1   -1.02    1.74
  -6   0  -1    0.70    1.54
   6   0   1    1.30    1.50
  -6   0  -1   -0.53    1.27
  -6   0  -1    1.67    1.32
  -6   0  -1   -0.56    1.44
   6   0   1   -4.26    1.54
   6   0   1    0.93    1.44
   6   0   1    0.54    1.76
  -8   0  -1    2.00    2.83
  -8   0  -1    1.37    2.78
  -8   0  -1   -0.15    2.33
  -8   0  -1   -1.78    2.21
   8   0   1   -2.91    2.20
  -8   0  -1    3.10    2.37
   8   0   1   -1.77    2.45
   8   0   1   -0.93    2.40
   8   0   1    1.18    2.29
  10   0   1    4.26    3.26
  10   0   1    3.56    3.34
 -10   0  -1    3.88    3.65
 -10   0  -1   -8.39    2.99
  10   0   1   -0.22    2.47
  10   0   1   -3.83    3.30
 -10   0  -1   -4.04    3.26
 -10   0  -1   -0.10    2.90
 -10   0  -1    0.98    3.51
  12   0   1   -1.77    3.10
 -12   0  -1   -1.71    3.26
 -12   0  -1   -3.49    3.35
 -12   0  -1    0.22    3.20
  12   0   1   -7.27    3.16
  12   0   1  -11.03    3.01
 -12   0  -1   -1.40    2.68
 -12   0  -1    1.14    3.46
  12   0   1   -2.25    3.54
  14   0   1    2.55    3.55
  14   0   1   -5.12    3.11
  14   0   1   -0.80    3.33
 -14   0  -1   -2.60    3.28
 -14   0  -1    3.90    3.41
 -14   0  -1    2.80    3.31
 -14   0  -1    1.73    3.08
 -14   0  -1    0.19    2.86
  14   0   1    0.75    3.15
 -16   0  -1   -4.65    3.06
  16   0   1    2.58    3.78
 -16   0  -1   -2.11    3.28
 -16   0  -1   -2.05    3.37
 -16   0  -1    1.18    3.46
  16   0   1    0.20    3.31
  16   0   1   -3.44    3.30
  16   0   1   -3.43    2.88
 -18   0  -1   -1.04    3.60
 -18   0  -1    0.24    3.48
  18   0   1    0.38    3.59
  18   0   1    0.72    3.83
  18   0   1    2.16    3.31
 -18   0  -1    0.95    3.65
  18   0   1   -0.44    3.00
 -18   0  -1    3.52    3.30
  20   0   1    2.79    4.02
 -20   0  -1   -3.06    3.89
 -20   0  -1   -7.20    3.27
 -20   0  -1   -0.46    3.78
  20   0   1   -6.03    3.38
  20   0   1    4.25    3.84
 -20   0  -1   -0.09    3.52
  20   0   1   -2.09    4.10
 -22   0  -1   -5.35    3.60
  22   0   1    2.39    4.64
 -22   0  -1    6.16    3.88
  22   0   1   -0.22    3.49
 -22   0  -1   -0.42    3.90
  22   0   1   -4.50    3.64
 -22   0  -1    0.12    4.23
  22   0   1    0.45    4.06
 -24   0  -1   -2.53    3.68
 -24   0  -1   -7.35    4.10
 -24   0  -1    0.96    4.57
  24   0   1    3.11    4.19
  24   0   1   -4.81    3.68
  24   0   1   -1.86    4.28
 -24   0  -1    2.44    4.01
  24   0   1   -3.22    4.30
 -26   0  -1   -3.44    4.24
  26   0   1   -0.97    5.17
 -26   0  -1   -7.49    4.24
  26   0   1    1.97    4.53
 -26   0  -1    0.81    4.57
 -26   0  -1    4.82    4.86
  26   0   1   -0.12    4.37
  26   0   1   -0.03    4.29
 -28   0  -1   -7.54    4.09
 -28   0  -1    4.08    5.34
  28   0   1    8.88    5.30
  28   0   1   -5.34    5.08
 -28   0  -1   -3.58    5.27
  28   0   1   -4.06    4.20
  28   0   1   -7.17    4.41
 -28   0  -1  -10.49    4.32
 -30   0  -1   -2.89    5.19
 -30   0  -1    7.45    5.41
 -30   0  -1    5.06    6.03
  30   0   1   -2.50    5.17
  30   0   1   -4.85    4.29
  30   0   1   -3.02    5.94
 -30   0  -1    1.99    5.40
  30   0   1    3.07    5.75
  32   0   1    2.39    5.79
 -32   0  -1   -8.45    4.94
 -32   0  -1   -5.54    5.08
 -32   0  -1   -1.62    5.38
  32   0   1   -7.72    5.07
  32   0   1   -3.33    4.91
 -32   0  -1    5.22    6.20
  34   0   1    1.04    5.87
 -34   0  -1   -5.04    5.10
 -34   0  -1    0.66    6.06
 -34   0  -1   -0.33    4.47
 -34   0  -1    3.78    6.08
  34   0   1   -0.24    5.07
 -36   0  -1   -4.38    4.78
 -36   0  -1    7.21    7.14
  36   0   1    6.35    6.13
 -36   0  -1   -1.93    6.09
 -36   0  -1   -0.28    5.58
  36   0   1    7.97    6.35
 -38   0  -1    0.35    4.97
 -38   0  -1   -2.88    6.16
 -38   0  -1    2.97    6.21
  38   0   1    2.60    5.98
 -40   0  -1    4.37    5.43
 -40   0  -1    9.20    6.93
  40   0   1   -0.10    5.20
 -40   0  -1   -1.60    5.35
 -42   0  -1   -9.69    5.27
  42   0   1   -5.34    5.72
 -42   0  -1    5.72    6.77
 -42   0  -1    4.21    5.14
  44   0   1    3.84    6.60
 -44   0  -1    8.48    5.75
 -46   0  -1    5.30    5.72
  46   0   1   -7.47    5.61
  48   0   1   -1.36    6.27
 -49  -1   1    0.79    6.11
  49  -1  -1    4.31    6.70
 -49   1   1  -11.58    4.87
  49   1  -1   -8.84    5.46
 -47  -1   1    3.76    6.31
 -47   1   1    8.75    6.48
  47  -1  -1    0.70    6.23
  47   1  -1    5.76    6.65
  45  -1  -1    3.24    6.03
 -45   1   1    0.20    6.15
 -45  -1   1    4.34    6.25
  45   1  -1   -3.16    5.90
 -43   1   1    0.22    6.28
 -43   1   1    1.63    6.22
 -43  -1   1    2.20    6.47
  43  -1  -1   -1.50    5.39
 -43   1   1   -0.73    5.84
  43   1  -1    2.20    6.02
 -41  -1   1   -0.18    6.56
 -41   1   1   -0.30    6.25
  41  -1  -1   -4.39    5.40
 -41  -1   1    8.52    6.52
 -41   1   1    4.67    6.12
  41   1  -1    6.39    5.95
 -41  -1   1   11.02    6.71
 -41   1   1    2.71    6.33
 -39   1   1   -0.53    5.80
 -39  -1   1   10.58    6.31
 -39   1   1   -6.46    5.62
 -39   1   1   -0.98    6.05
  39   1  -1    8.50    6.19
 -39  -1   1    2.98    6.62
  39  -1  -1   -2.93    5.33
 -39  -1   1    3.00    6.37
 -39  -1   1    6.86    6.30
  37   1  -1    2.36    5.98
 -37  -1   1   -4.77    5.54
 -37   1   1   -1.70    5.64
  37  -1  -1   -0.95    5.97
 -37  -1   1   -2.20    6.32
  37   1  -1   10.46    6.87
 -37   1   1    5.38    6.51
 -37  -1   1   -0.49    6.18
 -37   1   1   -6.01    5.68
 -37  -1   1    3.90    6.94
 -37   1   1   -4.13    5.74
  37   1  -1   -0.31    6.32
  35  -1  -1   -6.27    6.38
 -35   1   1    2.54    6.78
 -35  -1   1    7.09    6.26
 -35  -1   1   13.60    6.66
 -35   1   1    6.99    5.93
  35   1  -1    4.91    6.40
  35   1  -1    6.68    6.19
 -35   1   1   -8.68    5.75
 -35   1   1   -2.22    5.92
  35  -1  -1    3.13    5.90
  35   1  -1    8.30    6.38
  35  -1  -1   -9.03    5.49
 -35  -1   1    8.22    7.33
 -35  -1   1   -5.50    4.98
  33  -1  -1   -4.58    4.99
 -33  -1   1   -3.60    4.99
  33  -1  -1    1.61    5.46
 -33  -1   1    5.32    6.57
 -33  -1   1   17.21    6.83
  33  -1  -1    1.42    5.12
 -33  -1   1   -5.13    5.28
  33   1  -1    9.59    6.10
  33   1  -1   -3.42    5.82
 -33   1   1    0.02    5.31
  33  -1  -1    4.34    6.34
  33   1  -1    5.69    6.42
 -33   1   1   -4.98    5.41
 -33   1   1    0.02    5.03
 -33   1   1    6.01    6.77
  31  -1  -1  181.86   13.17
  31  -1  -1  163.40   12.55
 -31  -1   1  169.75   13.97
 -31  -1   1  185.01   14.26
  31  -1  -1  176.13   13.58
  31   1  -1  174.61   13.67
 -31   1   1  181.36   14.10
 -31  -1   1  163.33   13.35
 -31   1   1  165.27   13.47
  31  -1  -1  196.41   14.09
 -31  -1   1  147.00   12.55
  31   1  -1  170.54   13.89
  31   1  -1  190.38   13.78
 -31   1   1  155.25   13.32
 -31   1   1  164.40   12.51
  29  -1  -1   -1.24    4.70
 -29  -1   1    3.56    5.08
 -29  -1   1    5.38    5.37
  29   1  -1    1.24    4.91
  29   1  -1    3.05    5.27
  29   1  -1   -3.19    4.61
  29  -1  -1    0.15    4.80
  29  -1  -1    0.21    4.66
 -29   1   1    4.40    4.97
  29  -1  -1    3.72    5.42
 -29   1   1    3.55    4.56
 -29  -1   1    6.99    4.96
 -29   1   1    6.34    5.68
 -29   1   1   -4.90    4.85
 -27   1   1   79.31    8.88
  27   1  -1   96.07    9.30
  27   1  -1   97.35    9.12
  27  -1  -1   95.36    8.73
 -27   1   1   89.36    8.14
 -27  -1   1   78.46    8.87
  27  -1  -1   81.51    8.50
 -27   1   1   85.17    8.91
 -27   1   1   70.50    8.46
  27   1  -1   84.10    8.81
  27   1  -1   61.49    7.96
 -27  -1   1   81.77    8.45
  27  -1  -1   95.39    9.14
  27  -1  -1   80.25    8.16
 -27  -1   1   89.53    9.27
 -25   1   1  -11.36    4.54
  25   1  -1   -2.18    4.01
  25  -1  -1    2.63    4.46
 -25   1   1   -0.13    3.78
 -25  -1   1    3.23    4.47
  25   1  -1   -5.83    3.87
  25   1  -1   -5.37    4.27
 -25  -1   1    0.03    4.33
  25  -1  -1   -0.91    3.68
  25  -1  -1    4.44    3.98
  25   1  -1    1.45    3.96
 -25  -1   1    0.38    4.63
 -25   1   1    2.14    4.17
  25  -1  -1    4.18    4.10
 -25   1   1    8.34    4.51
 -23   1   1    6.78    5.06
 -23  -1   1   11.76    4.69
 -23   1   1    0.21    3.63
  23  -1  -1    7.94    4.11
  23  -1  -1    9.06    4.16
 -23   1   1    2.12    4.23
  23   1  -1    9.56    4.22
  23   1  -1    8.49    4.25
 -23  -1   1   -6.93    3.64
  23   1  -1    4.92    4.35
  23  -1  -1   10.09    4.27
 -23   1   1    3.10    3.92
  23  -1  -1    1.48    4.37
 -23  -1   1    3.33    4.15
  23   1  -1   -2.00    4.39
 -21   1   1    2.29    3.82
 -21  -1   1   -2.55    3.75
 -21  -1   1    2.30    4.02
  21  -1  -1   -1.54    3.53
  21   1  -1   -0.44    4.16
  21  -1  -1   -0.69    3.89
 -21   1   1   -2.77    3.68
 -21   1   1   -1.76    4.51
  21  -1  -1   -1.70    3.49
 -21  -1   1    1.40    4.21
 -21   1   1   -1.76    3.25
  21   1  -1   -7.32    3.42
  21  -1  -1    2.50    3.35
  21   1  -1    4.30    3.50
  21   1  -1   -0.53    3.87
 -19   1   1  162.61    9.83
 -19  -1   1  134.33   10.22
 -19   1   1  156.49   10.38
  19  -1  -1  158.52   10.16
 -19  -1   1  153.13   10.21
  19   1  -1  139.55   10.04
  19  -1  -1  154.28   10.14
  19   1  -1  157.53   10.55
 -19  -1   1  161.47   10.73
  19  -1  -1  140.32    9.57
  19   1  -1  141.74   10.28
 -19   1   1  132.74    9.91
 -19   1   1  149.84   10.54
  19   1  -1  138.48   10.11
  19  -1  -1  146.96    9.73
 -17   1   1    8.19    4.62
  17  -1  -1    6.61    3.92
  17  -1  -1   12.90    3.59
 -17  -1   1   18.83    4.38
  17  -1  -1   11.90    3.70
 -17   1   1    7.92    3.66
  17  -1  -1   13.44    3.77
 -17   1   1   22.68    4.27
  17   1  -1   15.59    4.14
 -17   1   1    5.36    3.70
 -17  -1   1    8.58    3.89
  17   1  -1    9.14    3.85
 -17  -1   1    8.87    4.00
  17   1  -1   12.32    4.00
  17   1  -1   16.38    4.30
  15  -1  -1   25.96    4.44
  15   1  -1   19.54    4.14
 -15   1   1   20.95    4.75
  15  -1  -1   13.96    3.55
 -15   1   1   22.73    4.05
 -15  -1   1   20.34    4.46
 -15  -1   1   15.22    4.26
  15  -1  -1   14.37    3.76
  15   1  -1   30.11    4.72
 -15  -1   1   15.25    4.19
 -15   1   1   25.57    3.67
 -15  -1   1   13.67    3.64
  15   1  -1   21.85    4.66
 -15   1   1   21.88    3.90
  15  -1  -1   22.03    3.86
 -15   1   1   22.01    4.03
  15   1  -1   18.02    4.28
  13   1  -1   -2.03    3.16
 -13  -1   1    2.92    3.21
 -13   1   1    4.87    3.22
 -13  -1   1    2.35    3.34
 -13   1   1    2.99    3.94
 -13  -1   1    4.39    3.80
  13   1  -1   -1.30    3.57
  13  -1  -1    0.38    2.93
  13  -1  -1    0.63    3.15
  13  -1  -1    5.03    3.50
  13  -1  -1   -0.39    3.22
  13   1  -1    7.73    4.09
 -13   1   1    1.95    3.55
 -13   1   1    1.49    2.69
  13   1  -1   -3.65    3.48
 -13   1   1   -3.84    3.07
 -13  -1   1   -1.93    3.26
  11   1  -1    0.64    3.60
 -11   1   1   11.89    5.03
  11   1  -1    6.90    3.34
  11  -1  -1    6.97    3.13
 -11   1   1    0.39    3.24
 -11  -1   1   -2.65    3.64
  11   1  -1    4.01    3.91
  11  -1  -1    3.97    3.18
  11  -1  -1    7.33    3.37
  11   1  -1    5.46    3.85
  11  -1  -1    3.68    3.61
 -11   1   1    4.46    2.82
 -11  -1   1    0.77    3.15
 -11   1   1   -3.14    3.03
 -11   1   1   -2.79    2.98
 -11  -1   1    5.30    3.82
  -9  -1   1    1.97    2.86
  -9   1   1    5.07    2.52
   9  -1  -1    2.78    2.56
   9   1  -1    1.45    2.83
  -9  -1   1    1.87    2.70
   9   1  -1    0.38    2.68
  -9   1   1    6.25    4.08
  -9  -1   1   -0.69    0.75
   9   1  -1    2.74    2.54
   9   1  -1    2.65    2.76
   9  -1  -1    4.72    2.29
   9  -1  -1    1.23    2.19
   9  -1  -1    0.15    1.84
  -9   1   1    0.63    2.54
  -9   1   1    3.37    2.09
  -9  -1   1    2.86    2.56
   7  -1  -1  135.28    7.03
  -7   1   1  143.35    6.98
  -7  -1   1  148.34    7.55
   7   1  -1  135.53    7.44
  -7   1   1  130.95    6.98
  -7   1   1  140.79    7.66
   7  -1  -1  137.85    6.99
   7  -1  -1  130.63    6.93
   7  -1  -1  136.95    7.02
  -7  -1   1  139.15    7.52
   7   1  -1  131.67    7.37
  -7  -1   1  137.22    7.50
  -7   1   1  137.23    7.09
   5   1  -1    0.15    0.34
  -5   1   1   -2.07    0.81
  -5   1   1    0.50    0.66
   5  -1  -1    0.12    0.73
   5  -1  -1    2.19    1.23
  -5   1   1   -0.13    0.35
   5   1  -1    4.54    1.56
  -5   1   1    4.64    1.06
  -5  -1   1    4.44    1.36
  -5  -1   1   -0.58    0.72
  -5  -1   1    5.37    1.39
   5  -1  -1    1.94    1.12
   5  -1  -1    1.68    1.08
  -5  -1   1   -0.67    0.80
  -5   1   1   -0.45    0.78
   5   1  -1    0.57    0.85
   5   1  -1    1.63    1.05
  -3  -1   1    0.11    0.62
  -3  -1   1    0.21    0.73
  -3   1   1   -0.60    0.58
   3   1  -1   -0.51    0.54
   3   1  -1    0.64    0.71
   3  -1  -1   -1.18    0.55
   3  -1  -1   -0.42    0.50
  -3  -1   1   -0.35    0.57
  -3   1   1   -0.62    0.59
  -3   1   1   -0.06    0.56
   3   1  -1   -0.93    0.55
  -3   1   1   -0.89    0.40
   3  -1  -1   -0.55    0.69
  -3  -1   1   -0.32    0.70
   3  -1  -1    0.21    0.63
  -3  -1   1   -0.82    0.56
   1   1  -1   -4.20    0.41
   1   1  -1   -4.58    0.53
  -1   1   1   -3.80    0.43
  -1  -1   1   -3.49    0.48
  -1  -1   1   -3.22    0.56
  -1  -1   1   -4.49    0.35
   1  -1  -1   -4.50    0.31
   1  -1  -1   -3.80    0.34
   1  -1  -1   -4.37    0.52
   1  -1  -1   -4.18    0.53
  -1  -1   1   -4.21    0.39
   1  -1  -1   -4.07    0.48
  -1   1   1   -4.38    0.46
   1   1  -1   -4.05    0.35
  -1   1   1   -3.69    0.38
   1  -1  -1   -4.08    0.49
  -1   1   1   -3.68    0.50
   1  -1   1   -2.79    0.49
   1  -1   1   -3.11    0.40
  -1   1  -1   -2.84    0.38
  -1  -1  -1   -2.41    0.37
   1   1   1   -3.07    0.48
  -1  -1  -1   -2.53    0.43
   1   1   1   -2.96    0.58
  -1  -1  -1   -3.81    0.53
   1   1   1   -3.24    0.48
  -1  -1  -1   -1.36    0.73
   1  -1   1   -2.42    0.59
  -1  -1  -1   -2.81    0.48
   1   1   1   -3.02    0.61
   1  -1   1   -2.98    0.43
  -1   1  -1   -2.75    0.43
  -1   1  -1   -3.58    0.46
  -3   1  -1   -2.34    0.45
   3   1   1   -2.47    0.90
  -3  -1  -1   -1.53    0.94
  -3   1  -1    0.10    0.63
  -3   1  -1   -0.48    0.57
   3  -1   1   -0.13    0.78
   3   1   1   -1.26    0.38
   3  -1   1   -0.76    0.57
  -3  -1  -1   -0.99    0.71
  -3   1  -1   -0.81    0.61
   3   1   1   -0.98    0.54
  -3  -1  -1   -1.48    0.82
   3  -1   1   -1.65    0.82
   3   1   1   -0.52    0.87
   3   1   1   -2.06    1.16
   3   1   1   -1.63    0.71
  -3  -1  -1   -1.47    0.57
   3  -1   1    0.39    0.91
  -3  -1  -1   -0.77    0.39
   3  -1   1   -1.72    0.71
  -3   1  -1   -1.23    0.43
   5   1   1   56.94    4.40
   5  -1   1   75.65    4.17
  -5  -1  -1   77.34    4.61
   5   1   1   73.99    4.71
  -5  -1  -1   67.49    4.55
   5  -1   1   74.89    4.11
  -5   1  -1   70.20    4.02
   5  -1   1   74.10    4.06
  -5   1  -1   73.68    4.12
   5   1   1   75.63    4.76
  -5   1  -1   74.35    3.98
  -5  -1  -1   78.17    4.23
   5  -1   1   75.52    4.11
  -7  -1  -1    1.84    2.34
  -7   1  -1    2.59    2.24
   7  -1   1    2.85    2.11
  -7  -1  -1   -0.10    2.08
  -7  -1  -1    2.33    1.36
   7  -1   1   -0.05    1.69
   7   1   1    5.09    2.53
  -7   1  -1   -3.00    1.77
  -7   1  -1    0.94    2.16
   7  -1   1    2.41    1.96
   7  -1   1   -0.01    1.98
   7  -1   1    5.47    1.88
   7   1   1    5.46    2.25
   7   1   1    2.54    2.32
   7  -1   1    0.77    1.89
   7   1   1   -0.45    2.47
  -7  -1  -1   -0.08    2.20
  -7   1  -1    1.10    1.76
  -9  -1  -1 1193.20   51.95
   9  -1   1 1197.85   51.19
   9  -1   1 1150.79   51.69
   9   1   1 1207.11   51.85
   9  -1   1 1242.83   51.78
  -9   1  -1 1141.76   51.29
  -9  -1  -1 1292.38   52.40
   9  -1   1 1252.09   51.29
   9   1   1 1246.52   51.96
  -9   1  -1 1236.97   51.60
  -9   1  -1 1191.78   51.35
   9  -1   1 1257.68   51.61
  -9   1  -1 1207.80   51.60
  -9  -1  -1 1215.04   52.34
   9   1   1 1309.27   52.54
  -9  -1  -1 1230.84   52.03
  11  -1   1   35.19    4.47
 -11  -1  -1   29.66    4.68
  11  -1   1   29.66    4.14
 -11   1  -1   32.95    4.35
  11   1   1   37.12    4.68
  11   1   1   40.88    5.07
  11  -1   1   35.29    4.56
  11   1   1   33.22    4.84
 -11  -1  -1   29.12    4.74
  11  -1   1   34.45    4.69
 -11  -1  -1   31.49    4.78
 -11   1  -1   32.90    4.05
  11   1   1   25.55    4.65
 -11  -1  -1   41.57    4.58
 -11   1  -1   28.03    4.33
  11  -1   1   30.81    3.94
 -11   1  -1   31.26    3.78
  13   1   1  271.45   13.68
 -13  -1  -1  267.00   13.45
 -13  -1  -1  247.47   13.49
  13   1   1  231.62   13.14
 -13   1  -1  251.05   13.04
  13  -1   1  246.11   12.63
 -13   1  -1  220.61   12.66
 -13   1  -1  247.08   12.53
  13   1   1  234.92   13.28
 -13  -1  -1  227.68   13.15
  13  -1   1  241.15   12.58
  13  -1   1  232.81   12.63
 -13  -1  -1  249.58   13.41
  13  -1   1  247.08   12.85
  13   1   1  246.44   13.37
  13  -1   1  241.40   12.87
 -13   1  -1  248.80   12.63
 -15   1  -1   -3.01    2.99
 -15  -1  -1    1.48    3.70
  15  -1   1    0.86    3.19
 -15  -1  -1    1.36    3.57
 -15  -1  -1   -2.46    3.29
  15   1   1   -1.03    2.99
  15  -1   1    2.68    3.16
  15   1   1   -1.91    3.56
 -15   1  -1   -4.12    2.94
 -15   1  -1    2.05    3.17
  15  -1   1    0.05    3.07
  15   1   1   -4.43    3.72
  15   1   1    0.47    3.43
  15  -1   1    0.30    3.28
 -17  -1  -1   63.60    6.58
  17   1   1   61.52    6.40
 -17   1  -1   70.19    6.51
  17   1   1   68.89    6.52
  17   1   1   51.38    6.40
  17   1   1   72.98    6.74
  17  -1   1   75.25    6.47
 -17  -1  -1   64.73    6.74
 -17  -1  -1   56.77    6.28
  17  -1   1   61.95    5.91
  17  -1   1   73.25    6.37
 -17   1  -1   72.14    6.00
 -17   1  -1   70.91    5.93
  17  -1   1   57.32    5.80
 -17   1  -1   48.06    5.80
  19  -1   1   -1.10    3.39
 -19   1  -1    2.27    3.42
 -19   1  -1   -0.17    3.25
 -19   1  -1    4.09    3.61
 -19   1  -1    1.05    3.81
  19   1   1    9.25    4.24
  19   1   1    4.47    3.47
 -19  -1  -1   -5.15    3.45
 -19  -1  -1   -2.10    3.85
  19  -1   1   -1.23    3.82
  19  -1   1    6.78    3.82
 -19  -1  -1   -0.66    3.97
  19   1   1   -0.39    3.89
 -19  -1  -1   -1.42    3.76
  19  -1   1    3.77    3.41
  19   1   1    9.54    4.48
 -21  -1  -1   24.37    5.30
 -21   1  -1   26.87    4.72
  21  -1   1   22.69    4.75
 -21   1  -1   22.88    5.10
 -21   1  -1   20.15    4.51
  21  -1   1   20.09    4.92
  21  -1   1   20.40    4.70
  21   1   1   20.53    5.29
  21  -1   1   23.97    4.87
  21   1   1   19.86    5.14
 -21  -1  -1   24.28    5.20
  21   1   1   25.56    5.31
 -21  -1  -1   27.41    5.19
 -21  -1  -1   15.31    4.60
 -21   1  -1   28.80    5.46
  21   1   1   27.34    5.28
 -23   1  -1    1.09    4.14
 -23  -1  -1    1.33    4.01
  23   1   1    7.53    4.71
 -23  -1  -1    2.15    4.56
  23   1   1    5.07    4.38
 -23   1  -1    2.17    3.93
  23  -1   1    3.83    4.67
  23  -1   1   -0.77    3.86
 -23   1  -1    1.97    4.11
  23  -1   1    1.86    3.85
 -23  -1  -1   -2.05    4.24
  23   1   1    0.36    4.51
  23   1   1    0.54    4.01
 -23  -1  -1    2.88    4.55
  23  -1   1    0.13    3.95
 -23   1  -1    0.06    3.75
 -25  -1  -1   26.90    6.15
  25  -1   1   45.52    6.90
  25   1   1   27.73    6.46
  25  -1   1   31.87    5.71
  25  -1   1   29.44    5.70
 -25  -1  -1   31.36    5.41
 -25  -1  -1   29.48    5.74
  25   1   1   29.03    5.60
 -25   1  -1   30.19    6.07
  25   1   1   32.91    6.27
 -25   1  -1   31.09    5.66
 -25  -1  -1   24.01    5.94
 -25   1  -1   33.21    6.08
  25   1   1   30.51    6.03
  25  -1   1   31.75    5.61
 -25   1  -1   26.88    5.35
 -27  -1  -1    6.81    5.09
  27  -1   1    0.28    4.21
 -27   1  -1    1.09    4.64
  27   1   1    3.99    5.56
 -27  -1  -1   -2.93    4.74
 -27  -1  -1    0.55    4.54
  27  -1   1   -5.27    4.21
  27   1   1    2.42    5.08
  27  -1   1   -2.85    4.34
 -27   1  -1   -1.49    3.70
  27  -1   1   -0.09    4.79
 -27  -1  -1   -9.16    4.54
 -27   1  -1   -7.07    4.31
  27   1   1   -1.61    4.65
  27   1   1   -5.59    4.48
 -27   1  -1    2.81    5.09
  29   1   1   28.77    6.39
 -29  -1  -1   25.88    6.72
 -29   1  -1   30.26    6.28
 -29   1  -1   25.73    6.81
 -29   1  -1   21.98    6.38
  29   1   1   17.22    6.02
 -29   1  -1   24.75    5.41
 -29  -1  -1   20.30    5.65
 -29  -1  -1   19.37    6.58
  29  -1   1   31.66    6.07
  29   1   1   12.71    6.30
  29  -1   1   22.60    6.11
  29  -1   1   31.91    6.91
  29  -1   1   18.30    6.03
 -29  -1  -1   21.19    6.15
 -31   1  -1   12.82    5.60
 -31  -1  -1    5.84    6.16
 -31  -1  -1    4.87    5.77
 -31   1  -1    7.03    6.27
  31  -1   1    4.09    6.11
 -31  -1  -1   -0.92    5.54
  31  -1   1   10.10    5.70
  31   1   1    7.04    6.06
  31  -1   1   -6.94    4.91
  31   1   1   -1.40    5.42
  31  -1   1    8.50    5.80
  31   1   1   -4.47    5.25
 -31  -1  -1    7.45    5.61
 -31   1  -1    5.82    4.61
 -31   1  -1    1.41    5.61
 -33   1  -1   11.11    6.42
  33  -1   1    3.14    5.81
 -33  -1  -1    5.29    5.99
 -33   1  -1    6.51    4.91
  33   1   1   10.25    6.31
 -33  -1  -1   -1.41    6.34
  33   1   1    4.58    5.99
 -33  -1  -1   13.09    6.29
 -33   1  -1    4.27    5.60
 -33  -1  -1    7.10    5.83
  33  -1   1   11.27    6.76
 -33   1  -1    8.14    6.32
  33   1   1   15.29    6.55
  33  -1   1    4.06    5.49
 -35   1  -1    7.75    5.34
 -35  -1  -1    6.09    6.55
  35   1   1    4.18    6.67
 -35  -1  -1   -6.24    5.92
  35   1   1    0.64    6.25
 -35   1  -1    6.29    6.35
 -35  -1  -1    5.39    6.83
 -35   1  -1   12.49    6.93
  35   1   1    6.41    6.53
  35  -1   1    4.13    5.79
 -35  -1  -1    6.10    5.97
 -35   1  -1    2.32    5.94
 -37   1  -1   73.94   10.17
  37   1   1   88.16   10.69
 -37  -1  -1   75.96   10.97
 -37  -1  -1   58.09    8.34
 -37   1  -1   67.20   10.01
 -37  -1  -1   60.68    8.98
 -37  -1  -1   72.95   10.63
  37  -1   1   82.95   10.36
 -37   1  -1   73.20    9.09
  37   1   1   76.25   10.51
 -39  -1  -1   15.62    5.84
 -39  -1  -1    6.21    6.42
 -39   1  -1   23.69    6.47
 -39   1  -1    2.94    5.84
  39   1   1   12.63    6.93
 -39   1  -1    9.95    6.69
  39  -1   1    4.83    6.01
 -39  -1  -1    4.78    6.44
 -41   1  -1    3.77    6.61
 -41   1  -1   -0.70    6.05
  41  -1   1   16.37    6.84
  41   1   1    8.84    6.67
 -41  -1  -1   15.07    7.26
 -41  -1  -1   12.30    5.62
 -41   1  -1    3.34    5.06
 -43   1  -1   -6.10    6.13
 -43  -1  -1   14.28    6.12
 -43   1  -1    7.92    5.85
  43   1   1    2.86    6.45
  43  -1   1    0.98    6.10
 -43   1  -1   -6.62    6.14
 -45  -1  -1   25.15    6.72
  45   1   1    1.93    6.94
  45  -1   1   -1.15    6.23
 -45   1  -1   -1.11    5.27
 -47   1  -1   11.96    6.23
  47  -1   1   10.15    6.99
  47   1   1    3.36    6.82
  49   1   1    3.65    7.08
  49  -1   1   -4.25    6.11
  50  -2  -1    9.75    7.06
  50   2  -1   11.88    7.92
 -50   2   1   11.38    6.96
 -50  -2   1   13.83    6.71
  48   2  -1    3.92    6.86
  48  -2  -1   -3.59    5.77
 -48  -2   1   12.96    6.69
 -48   2   1    3.20    6.17
 -46  -2   1   12.33    7.12
  46   2  -1   -5.48    5.70
  46  -2  -1    3.33    6.29
 -46   2   1    8.52    6.76
 -44   2   1   17.36    7.09
  44  -2  -1   12.50    6.70
 -44   2   1    6.72    6.74
  44   2  -1   13.28    6.84
 -44  -2   1   13.83    6.60
 -44   2   1   18.27    7.51
 -42   2   1   10.27    6.79
 -42   2   1    2.72    6.31
  42   2  -1    9.37    6.42
  42  -2  -1   22.78    7.10
 -42   2   1    0.02    5.87
 -42  -2   1   11.08    6.75
 -40   2   1   -0.85    5.72
 -40  -2   1   10.70    6.44
  40  -2  -1   -0.20    5.62
  40   2  -1    3.65    5.95
 -40  -2   1   -1.00    5.86
 -40  -2   1    5.82    6.47
 -40   2   1   -4.03    5.74
 -40  -2   1    3.54    6.97
 -40   2   1    1.66    6.07
  38  -2  -1   38.29    8.10
  38   2  -1   29.96    7.95
 -38  -2   1   25.37    7.71
 -38  -2   1   40.22    8.68
 -38  -2   1   15.55    7.22
 -38   2   1   21.10    7.37
 -38   2   1   25.03    7.84
  38   2  -1   37.64    8.32
 -38   2   1   28.95    7.78
 -38  -2   1   39.27    8.03
 -36  -2   1   29.28    8.31
  36  -2  -1   21.60    6.97
 -36  -2   1   20.45    7.24
 -36   2   1   42.12    8.37
 -36  -2   1   24.61    7.73
  36   2  -1   23.14    7.41
 -36   2   1   21.97    7.75
  36   2  -1   31.85    7.97
 -36   2   1   25.41    7.56
  36   2  -1   27.38    7.74
 -36  -2   1   23.02    7.64
  34   2  -1    1.83    5.63
 -34   2   1   11.67    6.31
  34   2  -1   11.23    6.68
 -34  -2   1   16.94    6.67
 -34   2   1    6.09    6.84
  34  -2  -1   16.38    6.99
 -34  -2   1   12.24    6.59
 -34  -2   1   11.18    6.97
  34  -2  -1    6.58    5.81
 -34   2   1    5.46    6.06
  34   2  -1    8.20    6.42
 -32  -2   1  114.17   11.28
 -32  -2   1  143.47   12.65
 -32   2   1  121.82   12.07
  32  -2  -1  144.63   12.36
  32   2  -1  131.02   12.07
  32  -2  -1  145.92   11.41
  32   2  -1  130.21   12.51
 -32   2   1  136.34   12.06
  32   2  -1  121.03   11.79
 -32   2   1  121.37   11.65
 -32  -2   1  162.28   13.46
  32  -2  -1  139.62   12.09
  30   2  -1  157.91   12.80
  30  -2  -1  165.85   12.52
 -30  -2   1  140.71   12.67
  30  -2  -1  138.77   11.25
 -30  -2   1  137.11   11.92
 -30  -2   1  136.26   12.56
 -30   2   1  149.12   12.68
  30  -2  -1  157.56   11.43
 -30   2   1  152.98   12.33
  30   2  -1  158.74   13.03
 -30   2   1  137.95   11.91
  30  -2  -1  134.90   11.85
  30   2  -1  167.56   12.85
 -28   2   1   44.24    7.14
 -28   2   1   38.33    7.50
  28  -2  -1   41.83    6.15
  28   2  -1   47.23    7.42
  28   2  -1   46.19    7.29
  28  -2  -1   40.70    6.46
  28  -2  -1   53.18    7.55
 -28   2   1   46.19    7.05
  28   2  -1   42.88    7.27
 -28  -2   1   51.13    7.68
  28  -2  -1   40.52    6.62
 -28  -2   1   36.89    6.76
 -28  -2   1   38.60    7.23
 -26   2   1   68.99    7.77
  26   2  -1   89.46    8.83
 -26   2   1   71.64    8.79
  26   2  -1   71.33    8.01
  26  -2  -1   74.62    7.87
 -26  -2   1   64.09    7.91
 -26  -2   1   82.82    8.88
 -26   2   1   81.16    8.34
 -26  -2   1   70.14    8.45
  26  -2  -1   93.70    8.55
  26   2  -1   84.09    8.76
  26  -2  -1   76.94    7.42
  26  -2  -1   61.03    7.03
 -24   2   1   74.32    7.75
  24   2  -1   88.32    8.53
  24   2  -1   73.27    8.02
  24  -2  -1   79.43    7.75
 -24  -2   1   82.77    8.56
  24  -2  -1   62.19    6.92
 -24  -2   1   85.75    8.33
 -24  -2   1   80.49    8.60
  24  -2  -1   76.43    7.13
  24   2  -1   71.99    8.22
 -24   2   1   76.21    8.56
  24  -2  -1   73.25    7.52
 -24   2   1   65.65    7.57
  24   2  -1   92.09    8.69
  22  -2  -1  240.65   13.69
 -22  -2   1  236.62   15.15
  22   2  -1  238.79   14.90
  22   2  -1  247.04   15.29
  22  -2  -1  226.32   14.05
 -22   2   1  251.61   15.40
  22   2  -1  245.47   15.02
 -22   2   1  235.74   14.36
 -22  -2   1  239.12   15.11
  22   2  -1  258.71   15.36
 -22  -2   1  226.01   14.67
  22  -2  -1  232.15   14.13
  22  -2  -1  238.47   13.75
 -22   2   1  259.98   14.76
 -20   2   1  452.39   23.79
  20  -2  -1  450.96   22.15
 -20  -2   1  465.45   23.76
 -20   2   1  452.06   22.88
 -20   2   1  466.83   23.02
 -20  -2   1  476.69   23.66
  20  -2  -1  470.50   22.33
  20  -2  -1  456.04   22.86
  20   2  -1  434.44   23.53
  20   2  -1  461.81   23.66
 -20  -2   1  431.93   23.54
  20   2  -1  459.37   23.58
  20  -2  -1  478.60   23.03
  20   2  -1  487.74   23.94
 -18  -2   1  136.96   10.17
 -18   2   1  146.03    9.74
  18   2  -1  158.13   10.52
  18  -2  -1  148.30    9.69
 -18   2   1  148.47    9.66
  18  -2  -1  154.08    9.30
  18   2  -1  142.61   10.28
 -18  -2   1  130.73   10.05
  18   2  -1  144.58   10.27
 -18   2   1  157.18   10.79
  18  -2  -1  149.93    9.62
  18   2  -1  154.38   10.38
 -18  -2   1  152.60   10.37
  18  -2  -1  154.05    9.35
 -16  -2   1   68.06    6.71
 -16   2   1   71.41    7.08
  16   2  -1   77.50    6.89
  16  -2  -1   75.19    6.19
 -16   2   1   62.19    5.80
  16  -2  -1   70.60    5.77
 -16  -2   1   73.33    6.66
  16  -2  -1   67.08    5.81
 -16  -2   1   68.34    6.47
  16   2  -1   72.81    6.90
  16   2  -1   71.95    6.88
  16  -2  -1   68.69    5.78
  16   2  -1   75.41    6.87
 -16   2   1   87.70    6.55
 -14  -2   1  159.94   10.30
  14   2  -1  160.74   10.17
  14  -2  -1  168.03    9.33
 -14  -2   1  174.87   10.33
  14   2  -1  166.95   10.38
 -14   2   1  157.13   10.48
 -14  -2   1  156.16   10.11
 -14   2   1  179.16    9.12
  14   2  -1  175.80   10.42
  14  -2  -1  154.75    9.27
 -14   2   1  161.18    9.53
  14  -2  -1  157.22    9.45
  14   2  -1  147.42   10.08
 -14   2   1  162.88    9.51
  14  -2  -1  151.20    9.01
  12   2  -1  139.14    9.33
  12   2  -1  150.57    9.59
 -12   2   1  159.06    8.82
 -12  -2   1  167.35    9.88
 -12   2   1  151.05    8.16
  12  -2  -1  144.82    8.34
 -12  -2   1  150.52    9.38
 -12  -2   1  136.33    9.31
 -12   2   1  142.43    9.92
  12  -2  -1  157.80    8.61
  12  -2  -1  153.25    8.58
  12   2  -1  149.69    9.55
  12  -2  -1  158.06    8.80
 -12   2   1  158.43    8.81
  12   2  -1  153.65    9.70
 -10   2   1  232.36   12.99
  10  -2  -1  232.18   11.40
 -10   2   1  221.84   11.55
  10  -2  -1  224.41   11.48
  10   2  -1  222.40   12.39
 -10  -2   1  242.11   12.72
  10   2  -1  223.28   12.53
 -10   2   1  241.75   11.29
 -10   2   1  232.58   11.63
  10  -2  -1  236.89   11.51
 -10  -2   1  230.36   12.62
 -10  -2   1  256.69   12.64
  10  -2  -1  246.17   11.75
  10  -2  -1  255.40   12.94
  10   2  -1  247.85   12.68
  -8   2   1  145.12    7.30
  -8  -2   1  147.25    8.55
   8  -2  -1  135.88    7.43
   8  -2  -1  150.36    7.57
   8  -2  -1  149.35    7.64
  -8   2   1  153.64    7.80
  -8  -2   1  148.88    8.51
   8   2  -1  148.31    8.46
  -8  -2   1  149.51    8.52
  -8   2   1  147.67    7.71
  -8  -2   1  161.31    8.59
   8   2  -1  150.58    8.52
  -8   2   1  150.60    8.80
   8  -2  -1  146.71    8.78
   8  -2  -1  147.22    7.51
   8   2  -1  160.73    8.58
   6   2  -1  162.54    8.44
   6  -2  -1  171.36    8.76
   6   2  -1  169.68    8.47
   6  -2  -1  159.60    7.58
  -6  -2   1  156.94    8.36
  -6   2   1  164.89    7.51
   6  -2  -1  149.98    7.59
  -6   2   1  172.06    8.71
   6  -2  -1  159.14    7.59
  -6   2   1  152.25    7.65
  -6  -2   1  149.51    8.27
   6  -2  -1  164.76    7.72
  -6  -2   1  162.30    8.44
  -6   2   1  163.92    7.73
  -6  -2   1  165.76    8.49
  -6   2   1  158.28    7.50
   4  -2  -1  400.83   17.27
  -4  -2   1  390.42   17.00
  -4   2   1  390.26   16.27
  -4  -2   1  367.65   16.78
   4  -2  -1  369.76   16.23
   4   2  -1  375.77   16.84
  -4  -2   1  394.58   16.91
   4  -2  -1  372.94   16.20
   4  -2  -1  359.95   16.32
   4   2  -1  396.51   16.93
   2  -2  -1  418.49   20.27
  -2  -2   1  457.65   20.29
  -2  -2   1  562.80   20.72
   2  -2  -1  488.09   20.22
   0   2  -1  112.53    4.41
   0  -2  -1   85.11    4.84
   0  -2  -1   79.09    4.75
   2  -2   1   91.72    4.46
  -2  -2  -1   64.52    4.02
   2   2   1   46.45    3.79
   2   2   1   75.30    3.71
  -4  -2  -1   32.62    2.99
  -4   2  -1   26.98    1.73
  -4  -2  -1   24.83    2.75
  -4  -2  -1   20.05    2.60
   4   2   1   29.33    2.84
   4  -2   1   27.75    1.67
   4  -2   1   27.93    1.63
   4  -2   1   23.88    1.64
   4   2   1   24.32    2.30
   4   2   1   27.18    2.83
  -4  -2  -1   20.84    2.49
   4  -2   1   27.15    1.70
  -4   2  -1   16.86    1.54
   4   2   1   16.15    2.35
  -4  -2  -1   21.35    2.24
   4  -2   1   26.38    2.59
  -4   2  -1   26.90    2.45
   6  -2   1   65.82    3.67
  -6  -2  -1   65.59    4.92
   6   2   1   65.60    4.93
  -6   2  -1   65.48    3.35
  -6   2  -1   68.51    3.98
   6   2   1   61.49    4.34
   6  -2   1   62.92    3.67
   6  -2   1   64.80    3.67
  -6   2  -1   58.13    3.76
  -6   2  -1   70.10    3.39
   6   2   1   65.69    4.79
  -6   2  -1   70.77    4.80
   6  -2   1   64.66    4.58
  -6  -2  -1   66.20    4.43
  -6  -2  -1   64.14    4.88
  -6  -2  -1   65.57    4.82
   6  -2   1   65.40    3.73
  -8  -2  -1  112.11    7.50
   8  -2   1  110.25    7.21
  -8   2  -1  123.16    6.11
   8  -2   1  122.81    6.49
   8   2   1  123.04    7.90
  -8  -2  -1  115.10    7.49
   8  -2   1  122.11    6.35
   8  -2   1  118.72    6.38
   8  -2   1  125.39    6.47
  -8   2  -1  132.55    6.85
   8   2   1  111.87    6.76
   8   2   1  122.13    7.57
  -8  -2  -1  113.65    7.71
  -8   2  -1  112.83    6.54
  -8   2  -1  113.91    6.02
  -8   2  -1  112.82    7.24
  10  -2   1   80.64    5.29
  10  -2   1   73.11    5.21
  10  -2   1   79.06    6.20
  10   2   1   77.80    6.38
  10   2   1   71.95    6.35
 -10  -2  -1   79.69    6.57
  10  -2   1   78.00    5.41
 -10   2  -1   80.47    5.48
 -10   2  -1   78.37    4.89
  10  -2   1   73.56    5.31
  10  -2   1   73.83    5.28
  10   2   1   79.39    6.60
  10   2   1   74.39    6.52
 -10   2  -1   77.33    4.89
 -10   2  -1   75.16    5.43
 -10  -2  -1   82.77    6.26
 -10   2  -1   60.48    5.67
 -10  -2  -1   76.13    6.50
  12   2   1   -2.27    3.13
 -12   2  -1    0.36    2.76
 -12  -2  -1   -2.45    3.32
  12  -2   1    3.79    3.15
 -12   2  -1   -0.08    2.74
 -12   2  -1   -1.44    2.93
  12   2   1   -1.86    3.53
  12  -2   1   -1.27    3.59
  12  -2   1    0.38    2.81
  12   2   1    4.29    3.81
  12  -2   1    4.83    3.11
 -12  -2  -1   -0.46    3.00
 -12  -2  -1   -2.38    3.47
  12   2   1    0.97    3.85
 -12   2  -1    0.25    2.21
  12  -2   1   -0.44    2.60
 -12   2  -1   -0.58    2.14
  12  -2   1   -1.23    2.76
  12   2   1   -0.83    0.90
  14   2   1  358.74   18.57
  14  -2   1  380.42   17.63
  14   2   1  369.12   18.74
 -14   2  -1  350.70   17.77
  14  -2   1  371.39   17.26
 -14  -2  -1  344.53   18.36
  14   2   1  326.44   18.35
 -14  -2  -1  364.03   18.65
  14  -2   1  333.28   17.47
 -14   2  -1  371.41   17.73
  14  -2   1  355.93   17.73
  14   2   1  363.31   18.50
 -14   2  -1  374.70   17.10
  14  -2   1  352.73   17.20
 -14   2  -1  385.45   17.77
 -14  -2  -1  357.33   18.54
 -14  -2  -1  397.85   18.76
  16   2   1   38.56    5.36
 -16   2  -1   45.12    5.00
  16  -2   1   50.32    5.74
  16  -2   1   49.31    4.96
 -16  -2  -1   45.91    5.81
 -16  -2  -1   49.43    5.93
  16   2   1   52.28    6.15
  16  -2   1   43.22    4.88
  16   2   1   41.00    5.28
 -16   2  -1   42.82    4.87
 -16   2  -1   49.08    5.32
  16  -2   1   36.02    4.65
  16  -2   1   48.60    5.06
  16   2   1   51.50    5.93
 -16  -2  -1   49.06    5.79
 -18   2  -1  561.17   26.34
 -18  -2  -1  535.58   27.14
 -18  -2  -1  577.40   27.39
  18  -2   1  572.09   25.88
  18   2   1  574.60   27.60
 -18  -2  -1  533.32   27.20
 -18   2  -1  552.47   26.32
  18  -2   1  578.20   26.41
  18   2   1  527.25   26.97
  18  -2   1  563.80   25.74
  18   2   1  567.05   27.20
  18  -2   1  531.34   26.31
 -18   2  -1  526.50   26.22
  18  -2   1  568.73   26.40
  20  -2   1   38.22    5.06
  20   2   1   42.57    6.43
  20   2   1   27.23    5.46
  20   2   1   39.22    5.99
 -20  -2  -1   43.20    6.23
  20  -2   1   54.96    6.02
  20  -2   1   43.86    5.39
 -20  -2  -1   34.54    5.91
 -20   2  -1   29.44    4.89
  20   2   1   40.41    6.17
 -20   2  -1   41.26    5.59
  20  -2   1   34.49    5.07
 -20  -2  -1   36.01    5.93
 -20   2  -1   37.54    5.61
 -22  -2  -1  105.22    9.14
  22   2   1  105.97    9.44
 -22  -2  -1  119.46    9.91
  22  -2   1   89.76    8.12
  22   2   1  102.66    9.29
 -22   2  -1  103.54    8.83
  22   2   1   91.07    8.93
  22   2   1  121.32    9.98
 -22  -2  -1  119.51    9.86
 -22   2  -1  110.54    8.54
 -22   2  -1  117.12    9.12
  22  -2   1  101.94    8.66
  22  -2   1   95.17    7.95
  22  -2   1   92.29    7.87
  24   2   1   39.89    6.67
  24   2   1   19.31    5.74
 -24  -2  -1   33.96    6.39
 -24  -2  -1   34.92    6.25
  24  -2   1   37.90    5.98
  24  -2   1   23.91    5.11
  24   2   1   38.90    6.46
  24  -2   1   40.25    5.57
  24  -2   1   27.99    5.33
  24   2   1   31.93    6.50
 -24  -2  -1   37.50    6.35
 -24   2  -1   29.16    5.72
 -24   2  -1   27.04    5.56
 -24   2  -1   45.62    6.28
 -26   2  -1   89.72    8.61
 -26   2  -1   94.56    9.04
  26   2   1   72.86    8.71
 -26  -2  -1   86.88    8.01
  26  -2   1   81.13    7.81
  26   2   1  102.70    9.60
 -26  -2  -1   65.50    8.67
  26  -2   1   79.68    8.05
 -26  -2  -1   84.02    9.14
  26  -2   1  105.04    9.33
 -26  -2  -1   74.94    8.83
  26   2   1   85.12    9.06
 -26   2  -1   82.70    8.43
  26  -2   1   89.43    8.72
 -28   2  -1   37.40    6.91
  28  -2   1   39.92    6.99
  28  -2   1   33.25    6.52
  28   2   1   47.14    7.72
 -28   2  -1   27.84    6.45
 -28  -2  -1   30.54    6.81
 -28   2  -1   26.97    6.32
  28  -2   1   31.99    6.04
 -28  -2  -1   34.58    7.28
  28   2   1   42.03    7.10
 -28  -2  -1   35.54    7.27
  28  -2   1   31.87    6.17
  28   2   1   44.33    7.49
 -28  -2  -1   29.37    6.00
 -30  -2  -1  168.19   13.99
 -30  -2  -1  166.38   13.91
  30  -2   1  185.20   13.64
  30   2   1  180.77   14.34
  30   2   1  161.77   13.41
 -30   2  -1  146.67   12.84
 -30  -2  -1  177.36   13.48
  30  -2   1  151.26   12.54
  30   2   1  163.06   13.32
  30  -2   1  165.44   12.32
 -30   2  -1  179.18   13.39
 -30   2  -1  159.96   12.59
 -30  -2  -1  156.88   11.74
 -32  -2  -1    4.85    5.93
  32   2   1    1.60    5.94
 -32   2  -1    7.10    5.88
  32  -2   1    3.61    5.06
  32  -2   1    2.11    6.21
 -32  -2  -1    1.54    5.42
 -32   2  -1    2.70    5.49
  32   2   1   -0.82    5.86
  32   2   1    1.34    5.82
 -32   2  -1    0.33    5.54
 -32  -2  -1    8.01    6.80
 -32  -2  -1   12.94    6.61
  34   2   1   63.82    9.91
  34   2   1   73.20    9.70
 -34   2  -1   72.25    9.26
 -34  -2  -1   60.96    9.20
  34   2   1   90.02   10.46
 -34   2  -1   73.62    9.79
  34  -2   1   44.89    8.14
 -34  -2  -1   63.56   10.16
 -34  -2  -1   60.01    8.28
 -34   2  -1   77.50    9.72
 -34  -2  -1   55.79    9.47
  36   2   1   10.37    7.10
  36   2   1    6.63    6.61
 -36   2  -1   13.46    6.92
 -36  -2  -1   10.02    6.85
  36  -2   1   11.52    6.60
 -36   2  -1   31.53    7.16
 -36  -2  -1   27.67    8.66
 -36   2  -1   18.79    7.37
 -36  -2  -1   24.49    6.68
 -36  -2  -1   16.24    6.75
  36   2   1   21.53    7.85
 -38   2  -1   35.36    7.78
 -38  -2  -1   33.20    7.62
  38  -2   1   30.61    7.40
 -38   2  -1   19.12    7.24
  38   2   1   37.16    8.22
 -38  -2  -1   27.96    6.50
 -38  -2  -1    6.66    6.79
  38   2   1   37.55    8.56
 -38  -2  -1   24.68    7.90
 -38   2  -1   20.84    6.50
 -40   2  -1   10.29    6.62
  40   2   1   16.79    7.26
  40  -2   1   21.66    7.07
 -40   2  -1   17.91    6.95
 -40   2  -1   19.37    6.59
 -40  -2  -1   17.73    5.84
 -42   2  -1   89.26   11.59
 -42  -2  -1   87.02    9.46
  42  -2   1   86.37   11.39
 -42   2  -1   76.63   10.01
 -42   2  -1   95.29   11.68
  42   2   1   78.67   11.46
  44   2   1   32.89    8.88
 -44   2  -1   29.14    7.27
 -44   2  -1   29.09    8.67
 -44   2  -1   17.34    8.15
 -44  -2  -1   21.97    6.02
  44  -2   1   23.28    7.70
 -46   2  -1   42.91    7.96
  46  -2   1   46.17    9.41
  46   2   1   29.92    9.06
  48   2   1   18.89    8.13
 -48   2  -1   11.87    6.43
  48  -2   1    0.76    6.40
  49   3  -1    7.69    7.88
 -49  -3   1    1.19    6.54
 -49   3   1    4.98    6.27
  49  -3  -1   -5.19    6.19
  47   3  -1   16.92    8.03
  47  -3  -1   31.88    8.51
 -47  -3   1   39.81    8.15
 -47   3   1    9.00    7.23
 -45   3   1    6.72    6.81
  45   3  -1   -1.39    5.97
 -45  -3   1    1.04    6.14
 -45   3   1    1.08    6.05
  45  -3  -1    0.69    6.39
 -45   3   1    1.74    6.40
  43  -3  -1   86.09   11.28
 -43   3   1   98.46   11.65
 -43   3   1   70.29   10.77
 -43   3   1  102.18   11.90
  43   3  -1   71.76   11.09
 -43  -3   1   84.67   10.51
  41  -3  -1    2.40    5.63
  41   3  -1    2.29    5.65
 -41   3   1    2.52    6.32
 -41   3   1    2.36    6.01
 -41  -3   1    4.11    5.68
 -41   3   1   -0.15    5.63
 -41  -3   1   -9.17    5.70
  39  -3  -1   15.21    6.46
 -39   3   1   18.73    7.03
 -39  -3   1    5.09    7.15
 -39   3   1    7.26    6.46
 -39  -3   1   12.94    7.14
 -39   3   1   12.84    7.01
  39   3  -1    7.37    6.07
 -39  -3   1   -0.56    5.33
 -39  -3   1   10.68    6.82
 -37   3   1    3.98    5.87
 -37  -3   1   11.21    6.96
 -37  -3   1    3.17    6.84
 -37   3   1    2.95    6.16
  37  -3  -1    5.22    5.75
 -37   3   1   12.38    7.33
 -37  -3   1    6.66    6.23
  37   3  -1   14.48    7.20
  37   3  -1    8.91    6.52
 -35  -3   1   30.89    8.02
  35  -3  -1   29.08    7.10
 -35   3   1   38.97    7.57
  35   3  -1   48.84    8.48
  35   3  -1   31.59    7.85
  35   3  -1   37.99    8.36
 -35   3   1   36.64    8.62
 -35   3   1   48.12    8.42
 -35  -3   1   46.53    9.05
 -35  -3   1   31.11    7.69
  33  -3  -1    6.96    6.15
  33   3  -1   -3.80    5.52
 -33  -3   1    1.02    5.44
 -33   3   1   -3.60    5.76
  33   3  -1   -0.07    5.49
  33   3  -1   -2.66    6.00
 -33   3   1   -2.19    5.03
 -33  -3   1   -1.61    5.40
 -33  -3   1    0.95    6.24
 -33   3   1    2.24    5.21
  33  -3  -1    4.75    5.27
  31   3  -1   49.36    8.36
  31  -3  -1   41.73    7.27
  31   3  -1   47.44    8.26
 -31  -3   1   41.78    8.24
  31  -3  -1   52.64    8.02
 -31  -3   1   38.71    7.45
  31   3  -1   35.12    7.52
 -31   3   1   41.79    8.09
 -31  -3   1   53.55    8.35
 -31   3   1   31.76    6.82
 -31   3   1   56.07    7.97
 -29  -3   1   -1.73    5.12
 -29  -3   1   -8.17    5.18
  29  -3  -1   -0.86    4.47
 -29   3   1   -0.58    4.77
 -29   3   1   -6.16    4.21
 -29  -3   1   -2.31    5.15
  29   3  -1    0.80    5.08
  29  -3  -1    5.16    4.67
  29  -3  -1   -0.89    4.80
 -29   3   1   -1.46    5.84
  29   3  -1    2.92    4.95
  29   3  -1   -1.93    5.20
  27  -3  -1   68.12    6.93
  27   3  -1   69.29    8.35
  27   3  -1   45.09    7.46
 -27   3   1   60.28    7.59
 -27   3   1   67.75    7.70
 -27  -3   1   66.37    8.61
  27  -3  -1   54.84    7.03
 -27  -3   1   68.53    8.37
  27   3  -1   66.57    8.27
  27  -3  -1   56.59    7.46
  27  -3  -1   55.30    6.77
 -27   3   1   64.36    8.65
 -27  -3   1   65.32    8.12
 -25   3   1    2.01    5.19
  25  -3  -1    2.28    4.49
  25   3  -1    6.14    5.22
 -25   3   1    0.72    4.08
  25  -3  -1   -0.16    3.43
 -25  -3   1    4.17    4.59
  25   3  -1    2.08    4.55
 -25  -3   1    4.45    4.89
 -25  -3   1    5.45    4.93
 -25   3   1   11.22    4.40
  25   3  -1   -1.27    3.77
  25  -3  -1   10.89    4.23
  25  -3  -1    6.77    4.09
  23   3  -1  187.30   12.64
 -23  -3   1  157.81   11.97
 -23   3   1  155.87   12.24
 -23   3   1  195.49   11.89
  23   3  -1  170.71   12.28
  23  -3  -1  164.45   10.59
  23  -3  -1  167.30   11.17
 -23  -3   1  161.52   11.97
  23  -3  -1  154.40   10.98
 -23  -3   1  167.33   12.36
  23  -3  -1  162.48   10.40
  23   3  -1  149.09   11.84
 -23   3   1  161.32   11.20
  21   3  -1   -3.32    4.12
  21  -3  -1    1.69    3.80
 -21  -3   1    6.50    4.45
 -21  -3   1   10.01    4.67
 -21   3   1    5.69    4.98
 -21   3   1    5.30    3.84
  21  -3  -1    2.62    3.54
  21   3  -1    7.05    4.51
 -21   3   1    6.10    3.39
  21   3  -1    2.30    3.94
 -21   3   1   15.06    4.40
 -21  -3   1    1.19    1.93
  21  -3  -1    3.36    3.39
  21  -3  -1    4.48    3.24
 -19   3   1   90.13    8.42
  19   3  -1  105.90    8.77
  19  -3  -1   96.31    7.60
  19   3  -1  100.68    8.61
  19  -3  -1   96.70    7.00
  19  -3  -1   87.22    7.10
 -19   3   1   92.52    7.34
 -19   3   1  100.23    7.72
  19   3  -1  102.51    8.72
 -19  -3   1  102.04    8.64
 -19   3   1   93.49    6.71
  19   3  -1   96.95    8.33
 -19  -3   1  100.69    8.61
  19  -3  -1  107.24    7.14
 -17   3   1   10.15    3.26
 -17  -3   1   12.13    4.19
 -17   3   1    8.02    2.95
  17   3  -1    8.94    4.20
 -17   3   1   11.53    3.46
  17  -3  -1   11.53    3.15
  17  -3  -1    6.75    2.93
 -17  -3   1    4.96    3.80
 -17   3   1   -1.66    3.78
  17   3  -1   10.47    3.93
  17  -3  -1    9.65    3.04
  17   3  -1    4.67    3.78
 -17  -3   1    1.30    1.58
  17   3  -1    4.88    4.19
  17  -3  -1    4.59    3.49
  15  -3  -1   65.44    5.56
 -15   3   1   63.12    5.42
  15   3  -1   42.79    5.93
 -15  -3   1   63.08    6.41
  15  -3  -1   61.06    6.62
  15   3  -1   61.71    6.35
 -15   3   1   64.98    4.85
  15  -3  -1   67.58    5.08
 -15   3   1   58.52    5.45
  15   3  -1   64.86    6.61
 -15   3   1   55.94    6.37
 -15  -3   1   59.19    6.44
  15  -3  -1   58.60    4.97
 -15  -3   1   70.06    6.38
  15  -3  -1   68.08    5.20
  15   3  -1   60.24    6.17
  13  -3  -1   10.02    4.66
  13  -3  -1   18.23    3.09
  13   3  -1   13.13    4.22
 -13   3   1   13.02    4.20
 -13  -3   1   23.07    4.28
  13   3  -1   14.81    3.78
 -13   3   1   18.57    3.19
  13  -3  -1   15.78    3.08
  13  -3  -1   17.29    3.06
  13  -3  -1   14.71    3.39
 -13   3   1   11.15    3.24
 -13  -3   1   12.23    4.10
  13   3  -1   11.04    4.12
 -13  -3   1   11.68    3.77
 -13   3   1   16.12    2.91
 -13   3   1   15.28    2.53
 -13  -3   1   25.59    4.61
 -11   3   1  167.52    8.96
  11   3  -1  176.09   10.46
  11  -3  -1  175.59    8.75
  11  -3  -1  183.22   10.76
  11  -3  -1  166.20    8.56
  11  -3  -1  169.27    8.96
 -11  -3   1  164.45   10.16
 -11   3   1  171.08    8.23
 -11   3   1  166.20   10.62
  11   3  -1  164.47   10.05
  11  -3  -1  163.02    8.76
 -11  -3   1  161.14   10.11
 -11  -3   1  179.03   10.35
 -11   3   1  158.75    8.93
 -11  -3   1  161.36   10.22
 -11   3   1  165.70    8.32
  11   3  -1  196.66   10.59
   9  -3  -1   31.95    3.49
   9  -3  -1   27.31    3.09
  -9   3   1   32.03    5.29
  -9  -3   1   29.07    4.41
   9  -3  -1   38.64    3.33
  -9   3   1   33.49    3.55
  -9  -3   1   21.59    4.22
  -9   3   1   29.98    3.22
   9   3  -1   23.56    4.03
  -9   3   1   26.80    2.84
  -9  -3   1   25.63    4.24
   9   3  -1   31.36    4.62
  -9   3   1   32.83    2.61
   9  -3  -1   31.69    3.09
  -9  -3   1   32.52    4.81
   9   3  -1   25.75    4.31
   9  -3  -1   25.53    5.29
   7  -3  -1   79.06    4.50
   7   3  -1   83.12    5.76
  -7   3   1   82.28    4.22
  -7   3   1   70.93    6.11
  -7  -3   1   83.21    5.93
   7  -3  -1   81.00    4.48
  -7  -3   1   74.29    5.83
   7   3  -1   78.43    5.98
  -7   3   1   87.11    4.17
   7   3  -1   73.49    4.97
   7  -3  -1   83.63    6.40
   7   3  -1   77.84    6.04
  -7   3   1   82.18    4.85
  -7   3   1   88.45    4.93
   7  -3  -1   78.06    4.68
  -7  -3   1   84.63    5.96
   7  -3  -1   80.49    4.55
   7   3  -1   82.28    5.97
  -7  -3   1   81.93    5.88
   5  -3  -1    9.61    2.91
   5   3  -1   12.11    1.90
   5   3  -1   12.86    2.37
   5  -3  -1   12.73    1.68
   5  -3  -1   12.09    1.65
   5  -3  -1    9.58    1.65
   5   3  -1    7.77    2.54
  -5   3   1   10.67    1.82
  -5   3   1   12.37    1.39
  -5   3   1   10.55    3.08
   5   3  -1   14.34    2.57
   5  -3  -1   15.51    1.78
   5   3  -1    7.33    2.25
  -5  -3   1    7.87    2.49
  -5  -3   1   10.17    2.32
  -5  -3   1   14.23    2.47
  -5  -3   1    7.67    2.36
  -5   3   1    8.32    2.07
  -3   3   1   12.90    1.43
   3   3  -1   11.25    2.03
  -3  -3   1   11.01    2.02
  -3  -3   1   11.66    2.05
   3  -3  -1   10.45    2.31
  -3   3   1   13.22    1.60
   3   3  -1   12.85    2.02
   3   3  -1    8.95    1.96
   3  -3  -1   13.57    1.75
  -3  -3   1   10.86    1.41
  -3  -3   1   10.94    1.98
   3  -3  -1   11.70    1.65
   3  -3  -1   10.41    1.56
  -3   3   1    9.33    1.41
  -3   3   1   13.25    2.27
  -3  -3   1   10.29    1.90
  -3   3   1   11.55    1.80
   3  -3  -1   11.72    1.60
   3  -3  -1   10.10    1.75
  -1  -3   1    4.58    1.28
   1  -3  -1    0.92    1.74
  -1   3   1    0.61    1.40
   1   3  -1    4.57    1.26
   1   3  -1    5.69    1.21
  -1  -3   1    5.27    1.45
   1  -3  -1    2.66    1.40
   1  -3  -1    3.30    1.52
   1  -3  -1    2.99    1.47
   1  -3  -1    3.67    1.46
  -1  -3   1    5.11    1.26
  -1   3   1    2.93    1.23
  -1  -3   1    5.35    1.35
  -1   3   1    4.00    1.57
  -1   3   1    2.34    1.42
  -1   3   1   -0.83    1.66
   1   3  -1    4.53    1.07
   1   3  -1    1.79    1.05
   1   3   1  344.57   16.84
  -1   3  -1  380.79   15.88
  -1  -3  -1  414.51   17.00
   1  -3   1  409.35   17.53
  -1  -3  -1  393.71   17.04
  -1  -3  -1  357.77   16.69
   1   3   1  353.84   15.49
  -1   3  -1  377.14   15.89
  -1  -3  -1  371.00   16.70
   1   3   1  392.66   16.90
   1   3   1  389.07   16.85
   1   3   1  391.65   16.85
  -1  -3  -1  389.33   16.96
  -1  -3  -1  359.81   15.79
   3   3   1    3.64    2.10
  -3  -3  -1    2.92    2.26
  -3  -3  -1    5.15    2.05
   3  -3   1    6.91    2.27
  -3  -3  -1    4.31    2.18
   3   3   1    3.28    2.11
  -3  -3  -1    2.00    1.66
   3   3   1    4.51    2.16
  -3  -3  -1    3.94    1.86
   3   3   1    4.27    2.29
  -3   3  -1    0.60    2.25
  -3  -3  -1    3.15    1.99
   3   3   1   -0.93    1.63
  -5  -3  -1   41.05    3.62
   5   3   1   42.42    4.19
  -5  -3  -1   42.96    4.32
   5  -3   1   38.34    4.11
  -5  -3  -1   36.00    4.01
   5   3   1   46.07    4.40
  -5  -3  -1   37.29    3.87
  -5  -3  -1   51.64    4.49
   5   3   1   48.61    3.72
  -5   3  -1   41.26    2.55
   5   3   1   41.27    4.24
  -5   3  -1   48.43    4.56
   5   3   1   43.93    4.07
   7  -3   1    0.11    1.52
  -7   3  -1   -0.90    1.95
   7  -3   1   -0.42    1.50
  -7  -3  -1    2.50    2.82
  -7  -3  -1   -4.25    3.16
   7  -3   1   -5.45    3.28
   7   3   1   -1.51    3.48
  -7  -3  -1    2.06    3.47
  -7  -3  -1    1.22    3.00
   7   3   1   -2.69    2.64
   7   3   1   -3.38    2.72
   7   3   1    5.40    3.74
  -7   3  -1   -4.06    1.95
  -7  -3  -1    1.10    3.35
  -7   3  -1   -0.27    3.17
   9  -3   1  194.73    9.15
  -9   3  -1  193.21   10.82
  -9   3  -1  194.02    9.42
  -9  -3  -1  177.80   10.85
   9   3   1  180.42   10.73
  -9  -3  -1  180.94   10.99
   9  -3   1  186.32    8.84
  -9  -3  -1  197.26   10.16
   9  -3   1  191.57    9.24
  -9  -3  -1  187.49   10.86
   9   3   1  219.47   11.39
   9  -3   1  194.93   10.85
  -9   3  -1  181.55    9.29
   9  -3   1  193.81    8.89
   9   3   1  198.20   10.16
   9   3   1  209.20   11.34
  11   3   1    7.79    3.40
 -11   3  -1    5.81    2.68
  11   3   1    3.66    2.75
  11  -3   1    6.18    2.39
  11  -3   1    3.64    2.35
  11  -3   1    4.08    2.25
  11  -3   1    5.28    3.89
  11   3   1    4.98    3.82
 -11   3  -1    2.23    1.57
 -11   3  -1   10.48    2.65
 -11   3  -1    7.63    3.49
 -11   3  -1    5.87    1.66
 -11  -3  -1    2.51    3.69
 -11  -3  -1   14.89    4.02
 -11  -3  -1    2.05    3.09
  11   3   1    4.06    3.88
  11  -3   1    4.20    2.25
  13  -3   1    3.57    2.56
  13   3   1   -4.69    3.22
 -13   3  -1    5.07    3.00
  13   3   1    5.95    3.97
 -13  -3  -1    8.11    3.93
 -13   3  -1    4.11    3.40
  13  -3   1   -1.62    2.51
 -13   3  -1    0.70    2.42
  13  -3   1   11.49    4.18
  13   3   1    0.79    2.81
 -13  -3  -1   -1.39    3.00
  13  -3   1    2.31    2.41
 -13   3  -1    3.33    1.95
  13   3   1    9.61    3.82
 -13  -3  -1    5.73    3.66
  13  -3   1    2.72    2.89
  13   3   1    3.15    3.44
 -13   3  -1    3.70    1.89
 -15  -3  -1    2.15    3.85
 -15  -3  -1    5.37    3.92
 -15   3  -1    3.12    3.03
 -15  -3  -1   -0.67    0.90
  15  -3   1   -0.33    3.41
  15   3   1    9.06    4.10
  15  -3   1   -1.90    2.59
 -15   3  -1    3.00    3.14
  15   3   1    3.60    3.01
  15   3   1    5.10    3.68
  15  -3   1    4.65    2.77
 -15   3  -1    4.03    2.27
  15   3   1    2.14    4.09
 -15   3  -1    1.24    3.39
 -15  -3  -1    2.44    3.31
  15   3   1   -0.64    2.99
  15  -3   1    4.36    2.69
  15  -3   1    1.38    3.02
  15  -3   1    4.31    2.89
  17   3   1   30.77    5.37
 -17  -3  -1   29.01    5.31
  17  -3   1   35.01    4.12
  17  -3   1   31.83    4.00
 -17   3  -1   42.27    5.16
  17   3   1   24.55    5.13
  17   3   1   35.07    4.64
 -17   3  -1   29.06    4.21
 -17   3  -1   30.48    3.56
 -17   3  -1   36.24    4.47
  17  -3   1   35.38    5.43
  17  -3   1   25.36    3.99
  17  -3   1   32.53    4.34
  17   3   1   29.84    5.38
  17  -3   1   45.33    4.69
 -17  -3  -1   29.81    5.19
  17   3   1   39.17    5.25
  19   3   1    1.88    3.17
 -19   3  -1   -1.59    3.07
  19  -3   1    2.32    3.17
  19  -3   1    6.79    3.54
  19   3   1    0.36    4.10
  19   3   1    4.63    4.02
  19   3   1    0.88    4.29
  19  -3   1    3.20    3.16
 -19  -3  -1   -2.09    3.92
 -19   3  -1    4.46    3.58
  19  -3   1    4.72    3.55
 -19   3  -1   -3.61    3.60
  19   3   1   -2.38    4.47
 -19   3  -1    1.19    2.59
 -19  -3  -1    1.67    3.26
 -19  -3  -1    0.48    4.22
  21  -3   1   43.08    5.07
  21   3   1   30.37    5.85
 -21  -3  -1   30.55    5.94
  21   3   1   27.53    5.97
  21  -3   1   37.38    5.26
 -21  -3  -1   32.68    6.12
  21   3   1   30.67    4.64
 -21   3  -1   22.83    5.13
 -21   3  -1   34.70    5.40
 -21   3  -1   32.03    4.95
 -21   3  -1   32.33    4.17
  21  -3   1   35.10    4.63
 -21  -3  -1   30.60    5.82
  21  -3   1   34.88    5.31
  21   3   1   23.84    5.63
 -23  -3  -1    1.70    4.45
  23   3   1    0.83    4.31
 -23  -3  -1   -2.60    4.60
  23   3   1    0.74    4.64
 -23  -3  -1    0.28    4.46
 -23   3  -1   -3.50    3.63
  23  -3   1   -2.32    3.86
  23  -3   1   -1.32    3.83
  23  -3   1   -4.97    3.25
 -23   3  -1    0.23    2.78
  23   3   1    9.81    5.25
 -23   3  -1   -0.19    4.17
  23  -3   1    2.07    3.52
 -23   3  -1   -0.85    3.81
 -25   3  -1   16.65    5.01
  25  -3   1   16.00    5.31
 -25  -3  -1   20.42    5.97
  25  -3   1   15.37    4.64
 -25  -3  -1   15.65    5.60
  25   3   1   18.09    5.68
 -25   3  -1   14.36    5.07
  25   3   1   18.19    5.87
 -25   3  -1   20.98    4.14
  25  -3   1   15.26    4.34
 -25   3  -1   12.62    5.23
  25  -3   1   12.66    4.46
 -25  -3  -1   16.90    5.67
  25   3   1   24.25    5.97
  27  -3   1    1.58    4.79
 -27  -3  -1    7.34    5.44
  27   3   1    5.47    5.19
  27   3   1    0.51    5.28
 -27  -3  -1   10.14    5.51
 -27   3  -1    5.20    4.71
 -27  -3  -1    5.82    5.56
  27   3   1    0.13    5.07
  27  -3   1    2.76    4.25
 -27   3  -1    0.30    4.41
  27  -3   1    2.21    4.59
 -27   3  -1    2.25    3.57
 -27   3  -1   -2.85    4.59
 -29   3  -1   35.18    5.55
  29   3   1   34.74    7.13
 -29  -3  -1   39.69    7.70
 -29   3  -1   47.80    7.33
  29   3   1   48.83    7.87
 -29  -3  -1   45.31    8.16
 -29   3  -1   41.55    7.24
 -29  -3  -1   28.35    7.22
  29  -3   1   44.51    6.93
 -29   3  -1   42.07    7.30
  29   3   1   39.20    7.80
  29  -3   1   37.32    6.99
 -31  -3  -1   10.19    6.96
 -31   3  -1    5.83    5.61
 -31   3  -1    3.05    5.54
  31   3   1    6.88    6.33
  31  -3   1   16.19    6.50
 -31  -3  -1   -1.39    5.68
 -31  -3  -1   21.06    6.68
 -31  -3  -1    4.12    5.79
  31  -3   1   -3.21    4.58
 -31   3  -1   -4.16    5.21
  31   3   1   16.22    6.67
  31   3   1    6.45    5.87
 -31   3  -1   12.39    4.59
 -33  -3  -1   22.37    7.24
 -33  -3  -1   28.68    6.45
 -33   3  -1   25.58    5.48
 -33  -3  -1   30.02    8.19
  33   3   1   26.29    7.45
 -33   3  -1    6.69    5.89
  33  -3   1   21.60    6.35
 -33   3  -1   19.91    6.64
 -33   3  -1   22.82    6.94
  33   3   1   31.20    7.78
  33   3   1   14.90    6.58
 -33  -3  -1   20.83    7.53
  33  -3   1   30.06    7.83
 -35   3  -1   10.43    6.40
 -35   3  -1   -5.00    5.70
  35   3   1   12.19    7.28
 -35   3  -1   -5.19    5.57
 -35  -3  -1    7.39    7.22
 -35  -3  -1    7.50    6.06
  35  -3   1   -9.38    4.65
 -35  -3  -1    0.02    6.34
  35   3   1    1.67    6.20
 -35  -3  -1   -3.54    5.92
  35   3   1   -0.60    6.49
 -37   3  -1    4.40    5.92
 -37  -3  -1    2.60    6.46
 -37   3  -1    6.15    5.86
  37  -3   1   -1.10    5.13
  37   3   1    3.74    3.69
  37   3   1    4.95    6.91
  37   3   1   -1.49    5.76
 -37   3  -1    0.87    5.71
 -37  -3  -1    2.56    5.91
 -37  -3  -1    2.10    6.20
 -37  -3  -1   -7.24    5.43
 -39   3  -1   -2.94    5.13
 -39   3  -1    3.94    5.68
 -39   3  -1    5.47    5.98
  39  -3   1    7.48    5.80
 -39  -3  -1    2.14    5.41
 -39  -3  -1   -4.36    5.14
  39   3   1    0.32    5.67
  41   3   1   15.21    7.74
 -41   3  -1   18.90    6.89
  41  -3   1   19.71    6.92
 -41   3  -1   22.96    7.19
 -41  -3  -1   25.76    6.27
 -41   3  -1   31.89    7.13
  43  -3   1    6.90    6.22
 -43  -3  -1    8.19    5.43
 -43   3  -1    6.16    6.48
 -43   3  -1    0.76    5.94
  43   3   1   -0.97    6.07
 -43   3  -1   -2.12    6.43
 -45   3  -1   21.15    6.90
 -45   3  -1   15.27    7.73
 -45   3  -1    8.35    7.17
  45  -3   1    5.59    6.47
  45   3   1    6.62    7.21
  47   3   1    7.70    7.63
  47  -3   1   -4.05    5.87
 -47   3  -1    8.00    6.12
 -48   4   1   24.33    7.86
  48   4  -1   28.14    9.01
 -48  -4   1   20.19    7.08
  48  -4  -1   10.28    7.42
 -46   4   1   31.43    8.56
  46   4  -1   42.77   10.04
  46  -4  -1   41.19    8.96
 -46  -4   1   30.53    7.89
 -46   4   1   23.21    7.83
 -46   4   1   61.57   10.07
 -44   4   1   83.32   11.45
  44  -4  -1   68.14   10.26
 -44   4   1  101.40   11.82
  44   4  -1   60.33   10.96
 -44  -4   1   63.58    9.46
 -44   4   1   71.27   10.49
  42   4  -1  109.05   12.88
 -42   4   1   95.38   11.59
 -42  -4   1  116.47   12.77
  42  -4  -1   84.13   10.81
 -42  -4   1   84.70   10.96
 -42   4   1   90.43   11.28
 -42   4   1  100.63   11.82
  40   4  -1   31.57    7.90
 -40  -4   1   16.41    7.25
 -40   4   1   19.72    6.85
 -40   4   1   28.25    7.55
  40  -4  -1   15.52    6.43
 -40   4   1   33.75    8.06
 -38  -4   1   23.95    7.54
 -38   4   1   22.94    6.95
 -38  -4   1   29.01    7.98
  38  -4  -1   19.02    6.57
  38   4  -1   17.37    6.79
 -38   4   1   16.56    6.84
 -38   4   1   26.47    8.00
 -36   4   1   -1.67    6.37
  36  -4  -1    5.59    5.72
  36   4  -1   -3.82    6.52
 -36  -4   1   10.81    7.27
 -36   4   1    3.62    6.07
 -36  -4   1   14.04    7.29
 -36   4   1    0.65    5.82
  36   4  -1    5.11    6.10
 -36  -4   1    2.20    6.08
 -34  -4   1    4.97    6.14
 -34  -4   1    3.53    7.09
  34   4  -1    0.46    5.65
 -34   4   1   -0.10    5.11
 -34   4   1   15.22    6.11
  34  -4  -1   12.48    5.66
  34   4  -1  -10.48    6.03
  34   4  -1    4.87    6.72
 -34   4   1   11.53    6.27
 -34  -4   1   11.83    6.64
 -34   4   1    8.80    7.35
 -32   4   1   97.32    8.30
 -32  -4   1   81.37   10.50
 -32  -4   1  100.22   10.98
  32   4  -1   58.38    9.38
 -32   4   1   97.46    9.66
  32   4  -1  106.14   11.23
 -32  -4   1   84.84   10.00
 -32   4   1   80.16    9.39
  32  -4  -1   71.54    8.74
 -32   4   1   52.82    9.40
  32  -4  -1   74.51    8.97
  32   4  -1   83.07   10.19
 -30  -4   1  203.30   14.99
 -30  -4   1  188.28   15.24
  30   4  -1  200.72   15.36
 -30   4   1  201.70   12.27
 -30  -4   1  213.91   15.64
 -30   4   1  200.24   14.08
 -30   4   1  180.68   13.62
  30  -4  -1  221.24   14.42
  30   4  -1  186.79   14.91
  30   4  -1  223.61   15.83
  30  -4  -1  168.58   13.39
 -30   4   1  186.22   14.88
  28   4  -1    4.02    5.60
 -28   4   1   24.73    6.81
  28   4  -1    8.68    5.30
 -28   4   1   18.81    5.58
  28   4  -1   24.60    6.70
 -28   4   1   12.20    4.47
  28  -4  -1   23.02    5.86
 -28   4   1   19.39    5.44
 -28  -4   1   18.76    6.26
  28  -4  -1   13.87    4.76
 -28  -4   1   15.35    6.33
 -26   4   1  139.53   10.65
 -26  -4   1  138.81   11.70
 -26  -4   1  145.41   12.31
  26  -4  -1  162.03   11.22
 -26   4   1  142.69   10.90
  26  -4  -1  125.38   10.24
  26   4  -1  156.76   12.29
 -26   4   1  148.29    9.56
 -26   4   1  140.44   12.07
  26  -4  -1  140.49    9.76
  26   4  -1  153.13   12.15
 -24   4   1   27.23    4.42
  24  -4  -1   40.79    5.82
 -24  -4   1   20.69    6.02
 -24   4   1   30.08    5.35
  24   4  -1   25.89    6.12
  24   4  -1   35.65    6.19
  24  -4  -1   28.62    4.62
  24   4  -1   35.81    6.56
 -24   4   1   21.52    6.22
  24  -4  -1   28.15    5.05
 -24  -4   1   31.01    6.24
  24  -4  -1   31.91    4.81
 -24   4   1   32.97    5.34
  22   4  -1  122.75   10.91
  22  -4  -1  159.15   10.38
 -22   4   1  158.67   10.48
  22   4  -1  151.85   11.77
 -22  -4   1  147.75   11.41
  22  -4  -1  146.60    9.45
  22  -4  -1  161.50    9.54
 -22  -4   1  155.60   11.75
  22   4  -1  151.50   11.73
 -22   4   1  156.63    9.14
  22  -4  -1  158.26   10.32
 -22   4   1  147.47   11.75
 -22   4   1  167.46   10.63
  20   4  -1  227.72   13.92
 -20   4   1  196.54   13.50
  20   4  -1  212.25   13.88
 -20   4   1  192.29   11.94
  20   4  -1  213.70   13.74
 -20  -4   1  138.48   12.32
 -20  -4   1  208.79   13.69
 -20   4   1  195.67   11.92
  20  -4  -1  217.32   11.43
  20  -4  -1  209.84   11.23
 -20  -4   1  215.83   13.82
  20  -4  -1  224.48   12.27
  20  -4  -1  213.81   12.04
 -20   4   1  216.38   11.03
  18   4  -1  268.15   15.52
 -18   4   1  271.67   15.63
 -18   4   1  270.42   13.84
 -18  -4   1  275.01   15.52
 -18  -4   1  235.50   14.89
  18  -4  -1  250.25   12.77
  18   4  -1  224.69   14.71
 -18  -4   1  267.60   15.42
  18  -4  -1  264.24   13.62
  18  -4  -1  231.62   12.71
  18  -4  -1  259.62   13.63
 -18   4   1  241.63   13.48
 -18   4   1  267.79   12.61
 -16   4   1   39.74    5.90
 -16  -4   1   44.24    5.70
  16  -4  -1   50.70    4.19
 -16  -4   1   52.54    6.08
  16   4  -1   47.08    5.71
  16  -4  -1   46.67    4.29
 -16   4   1   46.10    4.62
 -16  -4   1   49.72    6.21
  16  -4  -1   52.99    4.64
 -16  -4   1   54.52    6.11
 -16   4   1   44.50    4.54
  16  -4  -1   53.20    4.89
  16   4  -1   47.44    6.02
 -16   4   1   47.82    3.93
 -14   4   1   20.05    2.55
  14  -4  -1   23.36    3.00
 -14  -4   1   23.56    4.72
 -14   4   1   24.37    2.35
 -14  -4   1   15.11    3.91
 -14   4   1   15.71    3.23
 -14   4   1   15.23    3.24
  14  -4  -1   18.63    3.43
 -14  -4   1   18.44    4.45
  14   4  -1   23.67    4.42
  14   4  -1   17.27    4.55
  14   4  -1   18.41    4.52
  14  -4  -1   21.38    2.95
 -14   4   1   16.72    4.38
  14  -4  -1   24.70    3.24
 -14  -4   1   18.99    4.32
  12   4  -1   88.64    7.29
  12   4  -1   91.65    7.22
 -12   4   1   79.88    5.60
 -12   4   1   87.32    5.70
  12  -4  -1   85.32    5.06
 -12  -4   1   85.25    6.94
  12   4  -1   81.68    6.84
 -12  -4   1   81.68    6.97
  12   4  -1   76.61    5.95
  12  -4  -1   95.56    7.94
  12  -4  -1   87.26    5.18
  12  -4  -1   80.90    5.37
 -12  -4   1   96.41    7.36
  12  -4  -1   89.10    5.65
  12   4  -1  103.21    7.41
 -12  -4   1   95.43    7.53
 -12   4   1   77.54    7.25
 -10  -4   1  224.17   12.25
  10  -4  -1  200.01    9.73
  10   4  -1  215.68   11.86
  10  -4  -1  225.94   12.55
 -10   4   1  199.56   10.24
  10  -4  -1  225.19   10.40
  10   4  -1  231.97   12.42
  10   4  -1  215.50   12.19
  10   4  -1  213.18   10.80
 -10  -4   1  203.86   11.88
 -10  -4   1  217.82   11.98
 -10  -4   1  212.07   12.01
 -10   4   1  214.93   10.42
  10  -4  -1  210.58   10.18
  10  -4  -1  222.80    9.92
  10   4  -1  222.02   11.96
 -10   4   1  199.70   12.23
   8   4  -1    0.81    3.47
   8  -4  -1    0.65    1.75
   8  -4  -1   -1.90    4.15
  -8   4   1    1.09    2.04
  -8  -4   1    0.63    3.30
   8   4  -1    0.63    2.84
  -8   4   1    1.14    2.17
   8   4  -1   -3.83    2.33
   8  -4  -1    6.10    2.33
   8  -4  -1    0.76    1.90
  -8   4   1   -3.76    3.69
  -8  -4   1    1.29    3.39
  -8  -4   1   -2.82    3.17
  -8  -4   1    4.55    3.27
   8   4  -1    4.97    3.71
   8   4  -1    2.77    3.55
   8  -4  -1    2.24    1.89
   6  -4  -1   14.49    2.11
   6  -4  -1    8.29    2.22
  -6   4   1    9.36    3.68
   6   4  -1    9.08    3.37
   6   4  -1   14.43    3.07
   6  -4  -1   11.75    2.02
  -6  -4   1   13.56    3.77
   6   4  -1    7.22    2.41
   6  -4  -1   12.49    2.13
   6  -4  -1    9.82    1.86
  -6   4   1   12.42    2.30
   6   4  -1   11.16    3.93
  -6   4   1   15.00    2.60
  -6  -4   1    2.75    3.38
   6   4  -1   18.31    3.44
  -6  -4   1   17.27    3.38
  -6  -4   1   11.67    3.48
  -6  -4   1   12.78    2.80
   6  -4  -1   15.40    4.28
  -4   4   1   77.04    4.87
  -4  -4   1   86.22    5.57
   4   4  -1   77.48    5.41
   4  -4  -1   85.82    4.49
   4  -4  -1   85.13    4.48
   4  -4  -1   80.08    4.64
   4  -4  -1   92.61    4.70
  -4  -4   1   76.11    5.77
  -4  -4   1   86.30    4.72
  -4  -4   1   87.02    5.58
   4  -4  -1   86.62    6.56
  -4  -4   1   80.45    5.51
  -4   4   1   76.17    6.20
   4   4  -1   92.96    5.88
   4   4  -1   81.21    5.86
  -4   4   1   87.05    4.85
   4   4  -1   91.49    5.59
  -2  -4   1  698.54   29.26
   2  -4  -1  692.60   29.39
  -2   4   1  699.42   29.35
  -2   4   1  702.87   29.05
   2   4  -1  669.00   29.45
  -2   4   1  697.63   30.81
   2  -4  -1  713.81   30.70
  -2  -4   1  672.09   29.22
  -2  -4   1  690.75   29.57
   2  -4  -1  680.67   29.03
   2   4  -1  671.32   29.47
  -2   4   1  707.29   29.09
  -2  -4   1  709.65   29.66
  -2  -4   1  704.30   29.63
   2   4  -1  713.71   29.33
   2  -4  -1  669.01   29.38
   2   4  -1  707.50   29.30
  -2   4   1  661.91   29.27
   2  -4  -1  690.84   29.06
  -2   4   1  712.78   29.35
   0  -4  -1 1422.84   56.54
   0  -4   1 1327.99   54.34
   0  -4  -1 1348.40   55.69
   0   4  -1 1309.65   54.64
   0   4   1 1394.34   55.55
   0  -4  -1 1257.08   54.98
   0  -4   1 1294.47   54.27
   0   4  -1 1372.10   54.71
   0  -4   1 1369.82   54.99
   0   4   1 1369.61   55.35
   0   4   1 1338.90   56.46
   0  -4   1 1307.78   56.64
   0  -4   1 1255.95   54.91
   0   4   1 1264.03   55.21
   0  -4  -1 1352.15   55.15
   0  -4  -1 1343.56   55.70
   2   4   1    1.80    2.89
  -2  -4  -1    0.98    2.64
  -2  -4  -1    4.59    2.60
   2  -4   1    1.08    2.93
  -2  -4  -1    3.35    2.10
  -2  -4  -1    0.46    2.88
   2   4   1    1.96    3.11
  -2  -4  -1   -0.55    2.58
   2   4   1    1.66    3.07
  -2  -4  -1    4.20    2.87
   2   4   1    0.88    1.69
   2   4   1    5.29    3.25
  -4  -4  -1   43.63    4.86
   4   4   1   47.35    3.88
  -4  -4  -1   38.43    3.99
   4   4   1   44.49    4.91
   4   4   1   45.56    4.88
   4   4   1   49.00    4.48
   4   4   1   49.65    5.01
   4  -4   1   64.62    5.54
  -4  -4  -1   45.95    4.32
  -4  -4  -1   51.12    4.78
  -4  -4  -1   46.13    4.74
  -4   4  -1   56.30    5.48
  -4  -4  -1   46.95    4.50
   6   4   1   38.96    5.09
  -6  -4  -1   34.13    4.59
  -6  -4  -1   47.64    4.94
  -6   4  -1   49.17    5.31
   6   4   1   48.96    4.77
   6   4   1   43.39    5.02
  -6  -4  -1   37.55    4.14
   6   4   1   46.91    5.08
  -6  -4  -1   37.51    4.74
  -6  -4  -1   52.48    4.86
   6  -4   1   42.43    5.04
   6   4   1   39.37    4.01
  -8  -4  -1  107.16    8.03
  -8   4  -1  125.78    5.83
  -8  -4  -1  115.18    7.98
  -8  -4  -1  136.36    8.35
  -8   4  -1  118.91    8.15
   8   4   1  110.37    8.02
   8   4   1  118.13    8.24
   8  -4   1  119.14    8.19
   8   4   1  120.76    8.32
  -8   4  -1  115.17    5.82
  -8  -4  -1  108.51    7.72
  -8  -4  -1  118.25    7.23
   8   4   1  112.36    7.68
   8   4   1  112.71    7.06
 -10  -4  -1   21.16    4.27
 -10  -4  -1   12.64    3.65
  10  -4   1   15.56    2.12
  10   4   1   20.64    4.45
 -10  -4  -1   14.43    4.04
 -10   4  -1   18.78    2.56
 -10   4  -1   17.50    4.13
 -10  -4  -1   22.46    4.19
  10  -4   1   16.52    4.36
 -10   4  -1   14.57    2.40
  10   4   1   11.27    3.51
  10  -4   1   16.69    2.16
 -10  -4  -1    9.65    3.18
  10   4   1   17.46    4.26
  10   4   1    6.81    3.03
  12  -4   1   19.65    2.29
 -12  -4  -1    8.16    3.79
  12   4   1   20.15    4.58
 -12   4  -1   20.31    4.31
 -12  -4  -1   11.05    4.06
  12   4   1   19.38    3.78
 -12   4  -1   19.44    2.98
 -12   4  -1   18.86    3.00
  12  -4   1   20.72    2.26
  12   4   1   23.32    4.71
  12   4   1   30.55    4.46
 -12  -4  -1   18.55    4.36
  12  -4   1   27.94    4.72
  12  -4   1   18.04    2.67
  12  -4   1   22.65    2.77
 -12  -4  -1   11.95    3.67
 -14  -4  -1   22.38    4.60
 -14  -4  -1   26.27    4.79
 -14  -4  -1   22.46    4.35
  14  -4   1   25.73    4.89
 -14   4  -1   19.55    4.42
  14  -4   1   26.80    3.47
  14   4   1   21.57    4.78
  14  -4   1   17.64    3.05
 -14   4  -1   22.58    3.39
 -14  -4  -1   29.39    5.07
  14   4   1   15.98    4.51
 -14   4  -1   23.18    3.46
  14   4   1   19.38    3.77
  14  -4   1   26.12    2.81
  14  -4   1   24.19    2.83
  14   4   1   24.07    4.45
  16   4   1   48.53    6.21
  16   4   1   44.00    5.90
 -16  -4  -1   38.70    5.77
 -16   4  -1   44.64    4.63
 -16  -4  -1   29.12    5.25
  16  -4   1   37.65    3.75
  16   4   1   43.43    5.78
  16  -4   1   38.32    4.31
  16   4   1   37.12    4.73
 -16   4  -1   44.34    4.47
  16  -4   1   44.30    3.95
 -16   4  -1   42.04    5.46
 -16  -4  -1   45.26    5.98
  16  -4   1   47.07    4.46
 -18   4  -1  267.30   14.26
  18   4   1  270.35   14.70
  18  -4   1  262.33   13.21
  18   4   1  277.40   16.19
 -18   4  -1  253.50   15.27
  18  -4   1  271.77   14.06
 -18   4  -1  265.43   14.17
 -18   4  -1  274.06   12.67
 -18  -4  -1  271.81   16.08
  18  -4   1  263.25   14.17
  18   4   1  270.27   16.14
  18  -4   1  268.37   13.29
 -18  -4  -1  262.21   15.90
  18   4   1  292.75   16.28
  20   4   1   45.19    6.72
  20   4   1   56.36    6.97
  20  -4   1   56.88    5.68
  20  -4   1   57.65    5.14
 -20  -4  -1   58.30    7.14
 -20   4  -1   55.63    4.51
 -20   4  -1   50.12    5.52
  20  -4   1   57.41    5.95
  20  -4   1   52.91    4.92
  20   4   1   54.09    6.10
 -20   4  -1   54.68    6.43
 -20   4  -1   49.05    5.73
  20   4   1   61.01    7.36
 -20  -4  -1   55.74    7.18
  22   4   1   35.66    6.58
 -22  -4  -1   36.35    6.32
 -22   4  -1   38.08    5.36
  22   4   1   32.95    5.36
 -22   4  -1   41.57    5.91
  22  -4   1   42.91    4.90
 -22   4  -1   39.15    5.41
  22  -4   1   41.45    4.78
  22  -4   1   34.30    5.06
 -22  -4  -1   47.06    7.01
  22   4   1   47.74    6.82
  22   4   1   39.98    6.23
  22  -4   1   49.70    5.64
 -22   4  -1   32.51    4.10
  22  -4   1   38.10    4.83
 -24   4  -1   98.70    9.30
  24   4   1  114.68   10.56
  24  -4   1  123.16    9.16
 -24  -4  -1  117.57   10.68
  24  -4   1  100.78    7.97
 -24  -4  -1   97.13    9.90
  24   4   1  106.74   10.22
 -24   4  -1  122.96    9.31
 -24   4  -1  107.68    8.90
  24   4   1   94.48    8.72
  24  -4   1  127.37    9.23
  24  -4   1  105.20    7.92
 -24   4  -1  112.59    7.50
  26   4   1  123.89   11.56
 -26   4  -1  139.11   10.59
  26   4   1  119.88   10.04
  26  -4   1  135.29   10.36
  26   4   1  132.38   11.63
 -26  -4  -1  149.53   12.02
  26   4   1  137.88   11.98
 -26   4  -1  126.90   10.80
  26  -4   1  137.06   10.56
 -26   4  -1  131.93    8.74
 -26  -4  -1  121.11   11.39
 -26  -4  -1  122.42   11.68
 -26   4  -1  128.53   10.37
 -28  -4  -1  114.04   11.57
  28   4   1  106.05   11.22
 -28   4  -1  120.80    8.44
 -28   4  -1  110.91   10.14
  28   4   1  109.03    9.97
 -28  -4  -1  134.74   12.04
  28   4   1  119.82   11.48
  28  -4   1  111.78    9.97
 -28  -4  -1  112.85   11.14
  28  -4   1  111.57    9.88
 -28   4  -1   97.20    9.82
 -28   4  -1  101.49    9.80
  28   4   1  120.74   11.26
 -30   4  -1   73.02    6.78
 -30   4  -1   53.73    7.99
 -30   4  -1   51.87    7.84
 -30   4  -1   72.03    8.94
  30   4   1   55.13    8.56
  30  -4   1   69.46    8.34
  30   4   1   63.73    8.21
 -30  -4  -1   79.41    9.65
  30  -4   1   68.20    8.89
  30   4   1   84.69   10.12
  30   4   1   82.37   10.21
 -30  -4  -1   76.45   10.02
 -30  -4  -1   89.04   10.34
  32  -4   1    2.84    4.67
  32   4   1   10.66    7.17
 -32  -4  -1   -0.21    6.05
  32   4   1   -1.30    6.06
  32   4   1    8.14    5.55
 -32  -4  -1    6.83    6.28
  32  -4   1    6.70    6.35
 -32   4  -1   -9.95    4.79
  32   4   1    0.66    5.55
 -32   4  -1   -5.04    3.73
 -32   4  -1  -10.09    5.10
 -32  -4  -1   -9.58    5.72
 -32   4  -1    3.85    5.69
 -34   4  -1   30.49    7.42
  34   4   1   34.45    7.17
  34  -4   1    6.09    5.65
  34   4   1   12.11    7.41
 -34   4  -1   45.78    8.04
  34   4   1   21.19    7.23
 -34  -4  -1   34.64    9.00
 -34  -4  -1   13.53    7.35
 -34  -4  -1   24.25    7.83
  34   4   1   25.24    8.01
 -34   4  -1   21.83    6.82
  36   4   1   52.08    8.22
 -36  -4  -1   29.01    6.94
  36   4   1   44.15    9.22
 -36  -4  -1   50.82    8.97
 -36  -4  -1   57.84    9.73
  36  -4   1   52.51    8.02
 -36   4  -1   58.71    8.65
 -36  -4  -1   72.07   10.76
 -36   4  -1   57.41    8.65
 -36   4  -1   47.15    8.33
 -38   4  -1   26.64    7.14
 -38   4  -1   27.32    6.82
 -38   4  -1   34.38    7.62
 -38  -4  -1   22.85    7.33
 -38  -4  -1   24.09    6.15
  38   4   1   23.68    7.79
  38  -4   1   23.69    6.75
 -40   4  -1   67.22    9.64
 -40   4  -1   64.16    8.87
 -40  -4  -1   69.52    8.24
  40   4   1   44.05    9.32
 -40   4  -1   72.16    9.87
 -40  -4  -1   54.98    9.40
  40  -4   1   58.27    9.18
 -42   4  -1   76.92   10.66
 -42  -4  -1   62.37    8.22
  42  -4   1   78.45   10.18
 -42   4  -1   79.31   10.11
 -42   4  -1   66.62   10.24
  42   4   1   58.34   10.53
  44   4   1   27.67    8.72
 -44   4  -1   26.32    8.28
  44  -4   1   30.62    7.91
 -44   4  -1   40.78    8.21
 -44   4  -1   31.27    8.29
  46  -4   1   30.73    8.50
 -46   4  -1   43.36    9.15
  46   4   1   34.10    9.33
 -46   4  -1   39.84    7.98
 -46   4  -1   18.68    8.11
  48  -4   1   55.09   10.09
  48   4   1   48.72   10.53
 -48   4  -1   36.98    8.39
 -49   5   1    2.67    6.40
  49  -5  -1   13.66    7.31
  49   5  -1    6.03    6.97
 -47   5   1   14.14    7.40
 -47  -5   1   28.40    7.65
 -47   5   1   27.19    8.24
 -47   5   1   20.98    7.93
  47  -5  -1   20.82    7.51
  47   5  -1   23.02    8.52
 -45  -5   1   -1.89    6.97
  45   5  -1    0.08    6.32
  45  -5  -1   -4.02    5.12
 -45   5   1   -0.22    6.45
 -45   5   1    7.26    6.49
 -45   5   1   -1.34    6.02
 -43  -5   1   34.25    8.74
 -43   5   1   35.08    8.20
 -43   5   1   41.46    8.43
 -43   5   1   24.38    8.26
  43   5  -1   26.93    8.57
  43  -5  -1   41.65    8.13
 -41   5   1   26.99    7.81
 -41   5   1    9.08    6.41
 -41   5   1   13.40    6.41
  41   5  -1    1.49    6.20
 -41  -5   1   12.72    6.81
  41  -5  -1    5.09    5.54
 -39   5   1   37.11    7.49
 -39  -5   1   27.07    7.87
  39   5  -1   40.89    8.78
 -39   5   1   46.55    8.13
  39  -5  -1   33.90    7.30
 -39   5   1   36.46    8.57
 -37  -5   1   13.73    6.79
  37   5  -1   21.79    7.56
 -37  -5   1   15.84    7.11
  37  -5  -1    9.07    5.79
 -37   5   1   19.18    7.65
 -37   5   1   12.82    6.19
 -37   5   1    8.03    6.06
 -35   5   1    3.76    5.91
 -35  -5   1    3.58    6.08
 -35  -5   1   -0.27    6.96
  35   5  -1   -4.44    5.28
  35   5  -1  -11.11    6.42
  35  -5  -1   -1.19    5.01
 -35   5   1    4.15    5.69
 -35   5   1    1.51    6.98
  33   5  -1   11.03    7.21
 -33   5   1   10.65    6.01
  33  -5  -1    9.75    5.17
 -33  -5   1   23.39    7.16
  33   5  -1    6.62    6.70
 -33   5   1   13.90    7.23
 -33   5   1    6.85    3.97
 -33  -5   1    7.70    7.09
  33   5  -1    5.53    5.22
 -33   5   1    9.64    5.65
  33  -5  -1   16.04    6.60
 -31   5   1   72.86    8.59
 -31   5   1   77.23    6.67
  31   5  -1   71.54    9.71
  31  -5  -1   61.01    7.86
  31   5  -1   66.68    9.27
 -31   5   1   65.28    8.34
 -31  -5   1   54.20    9.35
 -31   5   1   74.26   10.03
  31  -5  -1   61.74    8.32
 -31  -5   1   75.50    9.51
  31   5  -1   67.38    9.57
  29   5  -1   15.04    6.60
 -29   5   1    6.82    5.19
 -29  -5   1    7.88    5.90
 -29   5   1   15.89    6.82
  29   5  -1    3.12    6.06
  29  -5  -1   18.22    5.76
 -29   5   1   14.03    5.42
  29  -5  -1    9.66    4.76
 -29  -5   1   18.23    6.83
  29   5  -1    7.59    5.44
 -29   5   1    8.58    3.65
 -27  -5   1   35.81    6.89
  27   5  -1   22.46    5.96
 -27   5   1   26.96    5.99
 -27  -5   1   24.23    6.82
  27  -5  -1   43.56    6.48
  27   5  -1   38.09    7.30
 -27   5   1   23.02    5.42
  27  -5  -1   20.37    5.26
 -27   5   1   33.06    7.43
  27   5  -1   43.83    7.76
 -27   5   1   24.99    4.07
 -25   5   1    9.18    4.22
 -25  -5   1    3.72    5.20
 -25  -5   1    3.12    5.13
  25  -5  -1   14.36    4.31
  25   5  -1    5.77    5.41
  25  -5  -1    1.08    4.47
 -25   5   1   10.45    3.05
  25   5  -1    2.56    5.03
 -25  -5   1    1.22    4.76
  25   5  -1   12.65    5.16
 -25   5   1    4.16    4.56
 -25   5   1    6.18    5.65
 -23  -5   1    0.31    4.44
  23  -5  -1    2.07    3.26
 -23  -5   1   -4.48    4.06
 -23   5   1    1.45    2.56
  23   5  -1   -3.96    3.41
  23  -5  -1   -2.16    2.94
  23  -5  -1    4.78    4.13
 -23   5   1    0.98    3.56
 -23  -5   1   -4.28    4.24
  23   5  -1    6.02    4.86
  23   5  -1   -1.50    4.48
 -23   5   1    3.20    4.96
 -23   5   1   -2.41    3.67
  21   5  -1   -5.20    3.18
  21  -5  -1    0.16    2.76
  21  -5  -1    5.63    3.86
  21   5  -1   -2.72    4.40
 -21   5   1   -3.50    4.06
 -21   5   1    0.77    2.15
 -21   5   1    3.39    3.27
 -21   5   1    4.46    3.43
  21  -5  -1    3.31    2.93
  21  -5  -1    1.80    3.05
  21   5  -1   -0.40    3.71
 -21  -5   1   -1.03    3.97
 -21  -5   1   -0.45    4.24
 -21  -5   1   -0.30    4.03
  19   5  -1  109.12    8.18
 -19   5   1  112.11    7.87
  19   5  -1  107.19    9.54
 -19   5   1  113.79    9.75
  19  -5  -1  112.67    7.53
  19  -5  -1  111.92    6.83
 -19  -5   1  111.76    9.49
 -19  -5   1  105.50    9.33
  19  -5  -1   95.97    6.47
 -19  -5   1  103.49    9.23
 -19   5   1  105.81    7.72
  19   5  -1  105.78    9.10
  19  -5  -1  113.59    7.74
 -17  -5   1   11.89    4.09
  17   5  -1    4.94    2.76
 -17  -5   1   12.67    4.32
  17  -5  -1   10.35    3.39
 -17   5   1   13.71    4.91
 -17  -5   1    6.84    4.15
  17   5  -1   13.20    3.59
 -17  -5   1    4.42    4.39
  17  -5  -1   11.82    2.67
 -17   5   1   17.37    3.39
  17  -5  -1    7.53    2.82
 -17   5   1    6.90    3.15
  17  -5  -1   13.24    2.67
  17   5  -1   11.34    4.56
  17   5  -1    6.72    3.80
 -15   5   1   38.34    4.04
  15   5  -1   41.47    4.59
  15   5  -1   37.31    5.04
 -15  -5   1   40.49    5.49
  15  -5  -1   38.17    3.79
 -15   5   1   40.77    6.19
  15  -5  -1   39.40    3.32
 -15   5   1   39.18    4.12
 -15  -5   1   39.34    5.55
  15   5  -1   33.75    5.47
  15  -5  -1   38.55    3.26
  15   5  -1   42.02    5.85
  15  -5  -1   38.24    4.05
 -15  -5   1   33.32    5.09
 -15  -5   1   35.81    5.31
 -13  -5   1   39.12    5.70
  13  -5  -1   46.01    3.75
 -13   5   1   37.00    5.85
 -13  -5   1   45.39    5.53
  13   5  -1   41.30    5.12
  13   5  -1   52.18    4.90
 -13   5   1   47.40    4.12
  13  -5  -1   43.15    3.15
  13  -5  -1   46.83    3.20
  13   5  -1   47.67    5.93
 -13   5   1   38.21    3.75
 -13  -5   1   36.30    5.19
  13   5  -1   37.63    5.47
 -13  -5   1   50.74    5.60
  13  -5  -1   46.83    4.00
 -11   5   1   70.48    7.00
  11   5  -1   83.00    5.75
 -11   5   1   78.14    5.11
  11   5  -1   77.91    6.45
 -11   5   1   78.93    5.14
  11  -5  -1   80.89    4.80
  11  -5  -1   80.55    5.04
 -11  -5   1   99.51    7.24
 -11  -5   1   72.81    6.90
  11   5  -1   86.94    7.30
  11   5  -1   79.26    7.06
 -11  -5   1   69.17    6.44
 -11  -5   1   91.09    7.08
   9  -5  -1   10.32    2.24
  -9   5   1    9.02    3.71
  -9  -5   1   13.19    3.75
   9   5  -1   10.39    2.69
   9   5  -1    9.44    3.51
  -9  -5   1    7.20    3.31
   9   5  -1   14.08    3.79
  -9   5   1    9.74    2.53
   9   5  -1    7.41    3.10
  -9  -5   1   11.03    3.70
   9  -5  -1    9.20    1.90
  -9  -5   1    8.43    3.77
   9  -5  -1   11.49    4.74
   9   5  -1    6.85    3.33
  -9   5   1    7.38    2.15
   7   5  -1  187.54    8.79
   7  -5  -1  190.39    8.59
  -7  -5   1  176.02   10.23
  -7  -5   1  163.32    9.21
   7   5  -1  181.97   10.10
   7   5  -1  181.84   10.61
  -7  -5   1  179.49   10.25
   7   5  -1  196.97   10.23
   7  -5  -1  211.58   11.61
  -7   5   1  190.72    8.86
   7  -5  -1  175.31    8.48
  -7   5   1  192.19    8.87
   7   5  -1  184.74   10.57
  -7  -5   1  185.67   10.64
  -7  -5   1  190.78   10.54
  -7   5   1  170.25   10.90
   5  -5  -1   34.83    2.98
  -5  -5   1   39.27    4.22
  -5  -5   1   34.66    3.42
   5   5  -1   39.82    4.53
   5  -5  -1   37.71    2.98
   5   5  -1   38.48    4.00
  -5   5   1   33.38    3.17
  -5  -5   1   37.71    4.47
   5   5  -1   38.12    3.86
   5   5  -1   40.21    4.64
   5  -5  -1   33.56    5.28
  -5  -5   1   34.25    4.12
  -5  -5   1   42.97    4.29
  -5   5   1   36.07    3.32
  -5   5   1   22.40    4.65
   3  -5  -1  143.80    9.05
  -3  -5   1  115.12    7.35
   3  -5  -1  139.54    7.18
   3   5  -1  139.40    7.28
   3   5  -1  129.48    7.71
  -3   5   1  146.03    8.96
  -3  -5   1  137.96    6.31
   3  -5  -1  132.60    7.04
  -3  -5   1  128.21    7.53
   3   5  -1  143.46    7.90
   3  -5  -1  139.34    6.79
   3  -5  -1  132.89    6.77
  -3  -5   1  140.57    7.83
  -3   5   1  149.74    7.39
  -3   5   1  143.29    7.43
   3   5  -1  144.77    7.28
  -3  -5   1  135.21    7.54
  -3   5   1  139.40    7.31
  -1   5   1   59.21    4.82
   1  -5  -1   55.91    4.38
   1   5  -1   56.03    4.26
   1   5  -1   66.03    3.48
  -1  -5   1   55.47    3.94
  -1  -5   1   63.98    4.39
  -1  -5   1   64.06    4.33
   1   5  -1   59.04    4.32
  -1   5   1   57.02    4.66
  -1   5   1   57.89    3.98
  -1  -5   1   59.30    4.11
  -1   5   1   60.87    5.71
   1  -5  -1   62.55    4.61
  -1   5   1   64.09    4.13
  -1  -5   1   61.32    4.01
   1  -5  -1   54.28    4.41
   1  -5  -1   68.58    5.90
  -1  -5   1   63.04    5.86
   1  -5  -1   63.41    4.44
  -1   5  -1  448.59   19.63
   1  -5   1  469.66   22.04
   1   5   1  456.66   20.54
  -1  -5  -1  460.37   20.54
  -1  -5  -1  458.26   19.12
  -1  -5  -1  482.04   20.87
  -1  -5  -1  435.61   20.75
  -1  -5  -1  441.87   20.49
   1   5   1  466.16   20.83
   1  -5   1  471.39   19.50
   1   5   1  457.21   20.81
   1   5   1  449.59   21.56
  -1  -5  -1  469.14   21.52
  -1   5  -1  459.29   19.67
   1  -5   1  470.85   19.53
  -3  -5  -1   41.31    4.51
  -3  -5  -1   42.53    4.40
  -3  -5  -1   33.62    3.61
   3   5   1   45.07    4.42
   3   5   1   39.56    4.73
   3  -5   1   35.50    4.97
  -3  -5  -1   46.08    4.69
  -3  -5  -1   32.58    4.25
  -3  -5  -1   38.53    4.38
   3   5   1   37.28    4.57
   5   5   1    8.84    3.56
   5   5   1   14.79    3.79
  -5   5  -1   10.40    3.96
  -5  -5  -1   10.24    3.13
   5  -5   1    8.68    3.72
  -5  -5  -1    5.75    3.57
  -5  -5  -1    3.14    2.92
  -5  -5  -1    9.69    3.43
  -5  -5  -1    1.77    2.52
  -5  -5  -1    4.22    3.31
   5   5   1   -0.92    2.75
   5   5   1    4.85    2.40
   5   5   1    0.97    3.40
   7   5   1    3.44    3.20
  -7  -5  -1   -3.34    2.72
  -7   5  -1    1.74    3.57
   7   5   1    5.02    2.51
   7   5   1    1.34    3.32
  -7  -5  -1   -3.01    2.42
  -7  -5  -1    3.92    3.41
  -7  -5  -1    2.03    3.23
   7   5   1   -0.16    3.06
   7   5   1    2.04    3.59
   7  -5   1   -5.45    3.24
  -7  -5  -1   -1.07    3.14
  -9  -5  -1   10.42    4.11
  -9  -5  -1    0.81    3.08
  -9   5  -1   -1.73    3.36
  -9  -5  -1   -6.58    2.41
   9   5   1   -0.01    2.91
   9   5   1   -0.23    2.52
   9  -5   1   -1.01    3.13
   9   5   1    2.82    3.70
   9   5   1    9.08    3.69
   9   5   1    1.47    3.74
  -9  -5  -1    2.26    3.41
  -9  -5  -1    1.72    3.48
 -11   5  -1   -0.48    1.94
  11   5   1   -4.77    3.10
 -11  -5  -1   -2.02    2.74
  11   5   1   -2.38    3.31
 -11   5  -1   -1.60    3.14
 -11  -5  -1    0.93    3.43
 -11  -5  -1    3.15    3.21
  11   5   1   -4.84    2.58
 -11  -5  -1   -0.77    3.47
  11   5   1   -2.89    2.93
 -11  -5  -1    1.60    3.01
 -11   5  -1    0.10    2.05
 -13  -5  -1    1.14    3.47
 -13  -5  -1    1.47    3.35
  13  -5   1    0.83    1.88
  13   5   1    7.79    3.57
  13  -5   1    2.42    1.89
 -13  -5  -1    1.06    3.17
 -13  -5  -1   -2.57    3.22
  13   5   1    1.45    3.08
  13   5   1    8.47    4.28
  13   5   1   -3.53    2.52
 -13   5  -1   -3.98    3.32
 -13   5  -1   -0.39    2.23
 -13   5  -1    4.34    2.45
 -15   5  -1    2.34    3.41
 -15  -5  -1    5.97    4.01
  15   5   1    1.55    2.85
  15   5   1   -0.20    1.51
 -15  -5  -1    0.49    3.23
 -15   5  -1   -0.58    2.37
  15   5   1    0.26    3.11
  15  -5   1    0.56    2.43
 -15   5  -1    0.96    2.68
 -15  -5  -1    1.59    3.79
  15   5   1   -0.05    3.84
  15  -5   1    2.09    2.25
 -15  -5  -1  -12.70    3.06
  17   5   1    0.63    3.26
 -17  -5  -1   -0.94    3.88
  17  -5   1    3.60    2.07
 -17   5  -1    3.10    3.78
  17   5   1    9.85    4.01
  17  -5   1    4.16    3.05
 -17   5  -1    6.49    3.21
 -17   5  -1    8.77    2.91
  17   5   1   -1.65    1.26
  17   5   1    9.88    4.56
 -17  -5  -1   -2.72    3.71
  17  -5   1    6.67    2.22
  17  -5   1   10.07    2.91
 -17  -5  -1    2.87    4.12
  19   5   1   16.57    4.99
 -19   5  -1   21.73    4.16
  19  -5   1   25.50    4.06
  19   5   1   19.04    4.39
  19  -5   1   21.77    4.13
 -19  -5  -1   21.09    5.42
  19  -5   1   22.41    3.25
  19   5   1   23.43    5.15
 -19   5  -1   25.54    4.33
 -19   5  -1   25.96    5.40
 -19  -5  -1   17.10    5.43
 -19  -5  -1   24.45    5.36
  19  -5   1   28.88    3.33
  19   5   1   27.75    5.75
 -21   5  -1    8.25    4.33
  21   5   1   13.06    5.31
 -21  -5  -1    1.79    4.41
  21  -5   1    7.84    3.50
 -21   5  -1    5.06    3.57
  21  -5   1   -0.93    3.49
 -21  -5  -1   12.99    5.05
  21   5   1   13.97    4.34
 -21  -5  -1   10.69    4.95
  21   5   1    1.04    4.63
  21   5   1    3.89    4.30
  21  -5   1    6.33    3.00
 -21   5  -1    3.87    3.27
 -23   5  -1    4.73    3.80
  23   5   1   -2.25    3.71
  23   5   1   -2.33    4.85
  23   5   1   -6.02    4.49
  23  -5   1    1.80    3.99
 -23   5  -1   -3.10    3.96
 -23  -5  -1   -3.05    4.56
 -23  -5  -1    2.21    4.53
  23  -5   1   -0.02    3.31
  23   5   1    3.41    4.51
 -23   5  -1    7.67    3.77
  25   5   1   35.44    5.86
 -25  -5  -1   31.00    6.95
 -25   5  -1   23.29    5.84
 -25  -5  -1   26.73    6.61
  25  -5   1   28.06    5.04
  25   5   1   41.47    7.13
  25  -5   1   24.46    5.33
 -25   5  -1   30.59    3.56
  25   5   1   30.89    6.61
 -25   5  -1   16.60    4.96
 -25   5  -1   30.87    5.46
  25   5   1   16.33    6.52
 -27   5  -1   -2.00    2.85
  27  -5   1    2.80    4.86
  27  -5   1   -3.51    3.95
 -27   5  -1   -5.84    4.92
  27   5   1   -5.69    4.59
 -27  -5  -1    8.69    6.26
  27   5   1   -6.73    5.34
  27   5   1    2.70    4.61
 -27  -5  -1    1.65    5.86
 -27   5  -1   10.17    4.73
 -27   5  -1   -0.80    4.56
  27   5   1    2.78    5.80
  29   5   1   11.13    6.50
  29  -5   1    4.51    5.44
  29  -5   1   -1.31    4.27
  29   5   1   -3.68    5.49
 -29  -5  -1    3.64    6.00
  29   5   1    1.59    5.23
 -29   5  -1    6.05    5.06
 -29   5  -1    5.60    4.93
  29   5   1    3.21    5.08
 -29  -5  -1    3.64    6.19
 -29   5  -1    5.86    3.48
 -29   5  -1   -6.56    5.28
 -31   5  -1   -0.67    5.45
  31  -5   1   12.85    5.99
 -31   5  -1    9.03    5.41
  31   5   1   -2.83    4.81
 -31   5  -1    5.22    3.67
 -31  -5  -1    4.46    6.22
  31   5   1   12.15    6.86
  31   5   1   -5.25    4.53
  31   5   1    1.71    6.74
  31  -5   1    7.17    4.93
 -31  -5  -1    6.37    6.73
 -31   5  -1    3.41    5.28
 -33  -5  -1   -4.73    6.16
 -33  -5  -1   -3.62    6.04
  33   5   1   -0.15    6.78
  33  -5   1    3.79    4.88
 -33   5  -1   -4.50    5.38
  33   5   1    2.39    6.08
  33   5   1    3.81    6.89
 -33   5  -1    5.16    5.82
  33   5   1    5.62    5.49
 -33  -5  -1   -3.39    6.21
 -33   5  -1    3.60    5.70
  35   5   1   12.42    7.34
 -35  -5  -1   -4.68    5.92
 -35  -5  -1   10.73    7.36
 -35  -5  -1   -1.88    6.50
 -35   5  -1    6.69    5.90
  35   5   1    6.46    5.80
 -35   5  -1    0.72    5.53
  35  -5   1    8.42    5.36
  35   5   1   11.39    6.79
 -35   5  -1    3.69    5.78
 -37   5  -1    5.53    5.68
  37  -5   1   10.12    5.54
 -37   5  -1    3.49    5.77
 -37   5  -1    8.44    5.91
  37   5   1   -3.49    5.76
  37   5   1    5.11    5.40
 -37  -5  -1   -3.32    5.68
 -39  -5  -1   -6.22    5.18
  39  -5   1   -3.45    4.60
 -39   5  -1    1.51    5.44
  39   5   1    3.64    6.47
 -39   5  -1   -5.28    5.13
 -39  -5  -1    4.30    6.24
 -39   5  -1   -0.31    5.15
 -41   5  -1    6.52    6.42
 -41  -5  -1    9.26    6.02
 -41   5  -1   23.26    7.32
 -41   5  -1   14.23    6.44
  41   5   1   24.13    7.83
 -41  -5  -1    7.09    6.59
  41  -5   1   15.11    6.26
 -43   5  -1   -8.77    5.29
  43  -5   1   -0.92    5.37
  43   5   1    1.73    6.88
 -43   5  -1   -1.25    5.97
 -43   5  -1   -7.17    5.41
  45  -5   1   11.29    6.78
 -45   5  -1   16.35    7.58
  45   5   1   11.14    7.52
 -45   5  -1   15.55    6.78
 -45   5  -1   11.84    7.14
 -47   5  -1   17.61    6.93
  47  -5   1   -2.82    5.66
 -47   5  -1    6.70    6.66
 -47   5  -1   -1.32    6.36
  47   5   1   -8.26    5.76
 -48   6   1   81.88   11.13
  48   6  -1   67.34   11.63
 -48   6   1   59.19   10.88
 -48   6   1   53.63    9.88
  48  -6  -1   62.95   10.31
 -46   6   1   60.24    9.93
  46  -6  -1   41.00    8.67
 -46   6   1   58.68    9.58
  46   6  -1   67.10   11.38
 -46   6   1   57.71   10.39
  44  -6  -1   56.14    9.08
 -44   6   1   60.99    9.65
  44   6  -1   55.86   10.42
 -44  -6   1   59.92   10.76
 -44   6   1   48.29    9.01
 -44   6   1   45.53    9.64
  42   6  -1   85.83   12.23
 -42   6   1   89.47   12.02
 -42  -6   1  104.64   12.58
 -42   6   1  110.35   11.68
  42  -6  -1   84.88   10.66
 -42   6   1   81.82   10.62
 -40   6   1   48.52    9.28
 -40  -6   1   59.77    9.91
 -40   6   1   34.29    7.72
  40  -6  -1   41.03    7.51
 -40   6   1   37.64    7.69
  40   6  -1   46.10    9.45
 -38   6   1   94.23   10.38
  38   6  -1   90.97   10.12
 -38  -6   1   91.34   11.30
 -38   6   1   66.74   10.67
  38   6  -1   97.73   12.10
  38  -6  -1   85.63    9.91
 -38   6   1   91.67   10.17
  36   6  -1   89.60    9.96
  36   6  -1   98.56   11.78
 -36   6   1  109.06   10.79
  36  -6  -1   78.57    9.55
 -36   6   1   90.60   11.76
 -36  -6   1   97.29   11.60
 -36   6   1   96.82   10.38
  34   6  -1    9.72    7.49
  34  -6  -1    0.46    4.84
 -34   6   1    6.73    6.97
 -34   6   1   11.10    6.15
 -34  -6   1   -2.30    6.59
  34   6  -1   17.73    7.80
  34   6  -1   -1.19    5.25
 -34  -6   1    6.59    6.52
 -34   6   1   19.70    6.41
  34   6  -1    7.44    6.31
 -32  -6   1   21.08    7.79
 -32  -6   1   36.88    8.05
  32   6  -1   40.23    8.19
  32   6  -1   24.81    8.01
 -32   6   1   26.39    6.61
  32   6  -1   25.65    7.67
  32  -6  -1   38.30    6.55
 -32  -6   1   26.44    7.36
  32   6  -1   39.37    6.93
 -32   6   1   24.90    7.96
 -32   6   1   20.86    6.10
  32  -6  -1   24.57    6.69
 -30  -6   1  245.30   18.32
  30   6  -1  276.65   19.21
 -30  -6   1  285.53   19.20
  30   6  -1  249.16   18.71
 -30   6   1  288.95   17.20
  30  -6  -1  278.93   16.81
 -30   6   1  268.98   16.91
  30  -6  -1  281.40   16.91
 -30  -6   1  270.41   19.10
  30   6  -1  266.81   16.80
 -30   6   1  270.51   19.10
  28   6  -1  277.70   19.64
 -28   6   1  318.84   18.31
  28   6  -1  318.70   18.45
 -28   6   1  311.04   20.61
 -28   6   1  319.42   18.35
  28   6  -1  322.77   20.66
  28  -6  -1  334.70   18.25
  28   6  -1  299.48   20.34
  28  -6  -1  311.73   18.11
 -28  -6   1  321.44   20.39
 -28  -6   1  320.08   20.58
 -28  -6   1  350.96   20.98
  26   6  -1  276.57   18.47
  26  -6  -1  263.49   15.83
 -26   6   1  264.14   18.38
  26   6  -1  278.50   18.42
 -26   6   1  288.30   16.28
  26   6  -1  268.93   17.95
 -26  -6   1  283.73   18.45
  26  -6  -1  285.15   16.08
  26   6  -1  279.49   16.42
 -26  -6   1  270.64   18.10
 -26   6   1  293.40   16.39
 -26  -6   1  274.62   18.23
  24   6  -1  359.77   21.32
  24  -6  -1  385.29   19.31
  24  -6  -1  355.02   18.94
  24   6  -1  358.77   19.50
 -24   6   1  358.20   19.22
 -24  -6   1  356.84   21.38
  24   6  -1  382.54   21.92
 -24  -6   1  367.82   21.61
 -24   6   1  378.30   22.07
 -24   6   1  376.25   19.36
 -24  -6   1  353.08   21.49
  22  -6  -1  268.72   14.67
  22   6  -1  261.89   16.75
  22   6  -1  295.06   17.74
 -22  -6   1  285.01   17.31
 -22  -6   1  281.35   17.19
 -22   6   1  268.91   17.30
  22   6  -1  254.69   15.09
 -22  -6   1  270.60   17.32
  22  -6  -1  273.95   14.70
 -22   6   1  266.82   14.82
 -22   6   1  254.19   14.64
  20  -6  -1  349.76   17.27
 -20  -6   1  336.81   19.63
  20   6  -1  335.06   17.78
  20   6  -1  340.60   19.97
  20  -6  -1  315.82   16.98
 -20   6   1  363.56   17.53
 -20  -6   1  352.93   20.04
 -20   6   1  333.36   19.94
  20   6  -1  355.03   19.75
  20  -6  -1  337.96   15.66
  20   6  -1  342.16   19.70
 -20   6   1  348.79   17.36
 -20  -6   1  352.87   19.72
 -18   6   1  216.79   11.04
  18   6  -1  183.13   11.29
  18   6  -1  173.73   12.82
 -18  -6   1  210.65   13.29
 -18  -6   1  191.41   13.27
  18   6  -1  209.57   13.58
 -18   6   1  195.38   13.37
 -18   6   1  190.23   10.70
  18  -6  -1  179.09   10.46
  18  -6  -1  184.20   10.40
 -18  -6   1  191.95   12.86
  18  -6  -1  186.12    9.06
  18   6  -1  174.49   12.41
 -16  -6   1  134.30    9.86
 -16   6   1  117.58   10.03
  16   6  -1  138.15   10.33
  16   6  -1  130.75    9.68
  16  -6  -1  122.57    7.52
  16   6  -1  124.67   10.04
  16  -6  -1  119.11    7.30
 -16   6   1  121.53    7.56
 -16  -6   1  126.37    9.77
 -16  -6   1  120.45    9.57
 -16  -6   1  118.57    9.60
  16   6  -1  136.66    8.56
 -16   6   1  136.49    7.89
 -14  -6   1    4.86    3.72
 -14  -6   1    3.77    4.02
  14  -6  -1   -0.12    1.92
 -14  -6   1   -0.37    3.29
  14   6  -1    2.65    4.03
  14   6  -1   -3.93    3.34
 -14   6   1    0.74    2.04
  14  -6  -1    0.28    2.44
 -14  -6   1    7.82    3.80
 -14   6   1   -2.23    3.79
 -14   6   1    2.67    2.47
  14   6  -1   -4.56    2.41
  14   6  -1    0.31    3.13
 -12  -6   1    1.98    3.53
  12   6  -1    0.90    2.89
 -12   6   1   -0.57    1.96
  12   6  -1   -1.76    3.41
 -12   6   1   -0.82    3.43
 -12  -6   1    3.18    3.20
  12  -6  -1    2.51    2.17
  12   6  -1    6.35    2.79
  12   6  -1    2.72    3.85
  12  -6  -1    0.65    1.75
 -12  -6   1    2.51    3.60
 -12   6   1    1.05    2.22
 -12  -6   1   -1.50    3.03
 -10  -6   1   50.41    5.50
 -10  -6   1   55.25    5.63
 -10   6   1   54.01    6.23
 -10  -6   1   58.41    6.10
 -10   6   1   53.92    3.90
 -10  -6   1   69.33    6.11
  10   6  -1   57.91    4.46
  10  -6  -1   56.67    3.77
  10   6  -1   61.89    6.12
  10   6  -1   46.88    5.52
  10  -6  -1   56.48    3.56
 -10   6   1   59.53    3.95
  10   6  -1   46.90    5.11
   8   6  -1  526.62   25.00
   8   6  -1  539.30   24.70
  -8  -6   1  571.89   25.22
  -8   6   1  521.37   26.01
  -8  -6   1  549.71   23.41
  -8   6   1  493.38   22.74
   8  -6  -1  526.34   22.62
  -8   6   1  519.52   22.83
  -8  -6   1  554.16   24.86
  -8  -6   1  542.24   25.21
  -8  -6   1  536.18   24.62
   8   6  -1  542.81   22.42
   8   6  -1  530.57   25.10
  -6  -6   1  834.44   35.87
  -6  -6   1  844.45   34.17
  -6   6   1  781.34   34.40
  -6  -6   1  820.80   36.39
   6  -6  -1  799.53   34.39
   6  -6  -1  860.37   37.54
   6  -6  -1  833.02   34.46
  -6   6   1  818.56   37.59
   6   6  -1  856.02   35.86
  -6  -6   1  830.56   36.33
  -6   6   1  789.88   34.44
  -6  -6   1  824.86   35.78
   6   6  -1  806.83   36.11
   6   6  -1  815.66   36.21
  -4  -6   1  231.48   12.03
  -4  -6   1  236.42   12.35
  -4   6   1  245.89   11.58
  -4   6   1  238.87   11.51
  -4  -6   1  256.94   10.93
   4   6  -1  247.78   11.93
   4   6  -1  243.90   11.82
  -4   6   1  245.01   11.52
  -4  -6   1  250.86   12.39
   4  -6  -1  252.90   13.74
  -4  -6   1  237.42   12.03
   4   6  -1  246.36   12.57
   4   6  -1  261.35   12.64
   4  -6  -1  244.45   10.76
   4  -6  -1  237.92   11.35
  -4   6   1  253.47   13.88
   4  -6  -1  242.38   11.34
   2   6  -1    2.58    2.23
  -2   6   1   -1.23    2.37
   2   6  -1    1.93    1.92
  -2  -6   1    2.46    2.27
   2  -6  -1    1.08    3.64
  -2   6   1    0.07    2.30
  -2  -6   1   -4.17    2.38
  -2  -6   1    3.50    3.78
  -2  -6   1    1.79    2.25
   2   6  -1    1.81    2.31
  -2  -6   1    1.49    2.15
  -2   6   1   -2.20    3.14
   2   6  -1    1.07    1.81
   2  -6  -1    0.65    2.41
   2  -6  -1    1.02    2.14
   2  -6  -1    0.29    2.02
   2  -6  -1    2.49    2.04
   0   6  -1    7.29    2.51
   0   6   1   15.14    2.50
   0   6   1    7.73    2.89
   0   6   1    2.56    3.36
   0  -6   1    5.85    2.13
   0   6   1   12.41    2.84
   0  -6  -1    5.38    3.61
   0  -6  -1   12.72    2.86
   0  -6   1    8.39    2.07
   0  -6   1    9.37    1.84
   0  -6  -1    6.35    2.86
   0  -6   1    9.44    2.40
   0  -6  -1   14.03    2.84
   0  -6   1    9.96    1.92
   0  -6  -1   13.82    2.81
   0   6   1   10.87    2.52
   0   6  -1   11.49    2.53
   0  -6   1   10.44    3.77
   2  -6   1  686.08   30.71
  -2  -6  -1  634.54   29.37
  -2  -6  -1  634.77   27.30
   2   6   1  648.93   30.26
  -2  -6  -1  659.73   28.92
   2   6   1  650.33   29.27
   2   6   1  678.00   29.04
  -2  -6  -1  675.90   29.41
  -2   6  -1  633.53   27.66
  -2  -6  -1  643.99   28.98
   2   6   1  694.62   29.57
  -2   6  -1  695.91   27.80
  -2  -6  -1  676.73   30.13
  -4  -6  -1  390.31   19.21
  -4  -6  -1  397.54   17.71
  -4   6  -1  398.84   20.38
  -4  -6  -1  433.77   19.39
   4   6   1  410.00   19.00
  -4  -6  -1  384.61   18.94
  -4  -6  -1  402.65   18.86
  -4  -6  -1  411.98   19.42
   4   6   1  391.33   19.25
   4  -6   1  387.35   19.98
   4   6   1  408.78   19.31
  -6   6  -1  226.69   13.28
  -6  -6  -1  226.91   12.06
  -6  -6  -1  241.13   12.46
  -6  -6  -1  240.47   12.45
   6   6   1  216.41   12.06
  -6  -6  -1  211.79   12.00
  -6  -6  -1  238.85   12.67
   6   6   1  220.27   10.51
   6   6   1  211.11   12.26
   6   6   1  223.62   12.57
  -6  -6  -1  214.32   11.18
  -8  -6  -1  110.52    7.73
  -8  -6  -1   93.82    7.40
   8   6   1  107.41    7.48
   8   6   1   95.09    6.22
  -8  -6  -1   77.68    7.23
  -8  -6  -1  104.49    7.59
   8   6   1   88.55    7.47
   8   6   1  105.10    7.82
  -8  -6  -1  120.46    7.08
  -8   6  -1  103.17    8.29
 -10  -6  -1    3.73    3.45
  10   6   1    4.00    3.60
 -10  -6  -1    5.86    3.46
 -10  -6  -1    0.82    2.69
  10   6   1    3.62    3.27
 -10  -6  -1    0.75    3.06
 -10  -6  -1    0.96    3.45
  10   6   1    1.82    2.56
  10   6   1    6.08    4.00
 -10   6  -1    4.97    3.54
  12   6   1   -3.20    2.84
 -12   6  -1   -0.64    1.74
 -12  -6  -1   -4.19    2.67
 -12   6  -1   -1.76    3.31
 -12  -6  -1    0.85    3.12
 -12   6  -1    1.38    1.80
  12   6   1    1.42    3.56
  12   6   1    2.74    2.67
 -12  -6  -1   -2.27    3.41
 -12  -6  -1    6.22    3.60
 -12  -6  -1    3.27    3.65
  12   6   1    7.05    3.97
  14   6   1  209.89   13.09
 -14   6  -1  181.81    9.83
  14   6   1  216.04   12.94
  14   6   1  204.07   13.20
  14   6   1  216.97   11.63
 -14  -6  -1  189.03   12.80
 -14   6  -1  186.84   12.74
 -14   6  -1  196.33   10.05
 -14  -6  -1  200.90   12.99
 -14  -6  -1  193.73   12.59
 -14  -6  -1  212.34   11.85
 -14  -6  -1  227.34   13.15
  14  -6   1  206.56    9.65
  14  -6   1  198.59    9.66
  16   6   1   55.74    7.18
  16  -6   1   51.64    4.28
  16   6   1   42.06    5.98
 -16  -6  -1   49.04    6.51
 -16  -6  -1   66.88    6.94
 -16   6  -1   57.36    6.81
 -16   6  -1   47.68    4.53
  16   6   1   61.70    6.96
  16   6   1   50.62    5.53
 -16  -6  -1   47.91    6.55
 -16  -6  -1   54.59    7.03
 -16   6  -1   52.25    4.54
  16  -6   1   55.73    4.45
 -18  -6  -1   95.93    9.14
  18   6   1   98.17    7.84
 -18   6  -1   95.00    8.93
  18  -6   1   97.73    6.68
 -18   6  -1  106.40    7.07
 -18   6  -1  110.74    7.18
 -18  -6  -1   99.96    9.24
  18  -6   1  111.81    6.92
  18   6   1   98.70    8.78
  18   6   1   85.97    9.05
 -18  -6  -1   85.52    8.70
 -20  -6  -1   48.14    7.15
 -20   6  -1   56.02    7.04
  20   6   1   43.64    6.43
  20  -6   1   49.02    5.05
  20   6   1   52.41    6.10
 -20  -6  -1   59.11    7.57
 -20   6  -1   52.11    5.32
  20  -6   1   48.65    5.15
 -20   6  -1   49.05    5.30
 -20  -6  -1   36.95    6.51
  20   6   1   59.54    7.62
 -22  -6  -1  149.17   11.89
  22  -6   1  135.22    9.11
 -22  -6  -1  125.15   11.33
  22   6   1  156.56   12.23
 -22   6  -1  132.59   11.11
  22   6   1  106.20   10.42
  22  -6   1  145.59    9.22
 -22   6  -1  130.67    9.19
 -22   6  -1  132.22    9.22
  22   6   1  135.16   10.03
 -22  -6  -1  138.10   11.58
  24   6   1   37.43    6.75
  24   6   1   54.75    8.03
 -24  -6  -1   42.31    7.38
 -24   6  -1   44.65    7.18
  24  -6   1   39.55    5.48
  24  -6   1   52.33    6.05
 -24  -6  -1   57.24    7.95
 -24   6  -1   35.42    5.57
 -24   6  -1   38.13    5.70
  24   6   1   38.03    7.31
 -24  -6  -1   43.89    7.70
  24   6   1   33.65    5.92
 -26  -6  -1  196.18   14.99
  26   6   1  188.07   14.94
 -26  -6  -1  184.56   14.79
 -26   6  -1  179.82   12.40
 -26   6  -1  182.49   12.36
  26   6   1  182.67   12.88
  26   6   1  187.79   14.46
 -26   6  -1  177.26   13.91
  26  -6   1  190.38   12.38
  26   6   1  202.14   14.99
  26  -6   1  199.09   12.49
 -26  -6  -1  185.75   14.55
  28   6   1  157.97   12.03
 -28   6  -1  165.24   11.89
 -28   6  -1  144.04   12.62
 -28   6  -1  153.61   11.56
 -28  -6  -1  163.01   14.20
  28  -6   1  153.98   11.43
  28   6   1  177.36   14.66
 -28  -6  -1  156.71   13.67
  28   6   1  130.56   12.97
  28  -6   1  166.73   11.87
  28   6   1  193.85   14.96
  30   6   1   45.51    8.80
 -30   6  -1   23.77    7.23
 -30   6  -1   33.69    6.40
 -30  -6  -1   41.66    8.14
  30   6   1   35.55    8.25
 -30  -6  -1   34.35    8.36
  30  -6   1   32.79    6.73
 -30   6  -1   39.87    6.89
  30   6   1   31.02    6.67
  30   6   1   26.61    7.22
  30  -6   1   30.41    5.95
 -32   6  -1   11.00    5.91
  32  -6   1   12.18    5.23
 -32   6  -1   11.73    6.74
  32   6   1   13.51    7.65
 -32  -6  -1    7.43    7.20
  32   6   1   11.78    5.76
 -32  -6  -1   12.08    6.74
  32   6   1    8.09    6.43
 -32   6  -1   11.66    5.75
  32   6   1    0.82    6.83
  34   6   1   87.65   10.00
 -34   6  -1   99.04   10.29
 -34  -6  -1   99.46   11.89
 -34   6  -1   92.19    9.91
  34   6   1   96.47   11.88
 -34   6  -1   84.42   10.54
  34  -6   1   83.43    9.51
  34   6   1  101.27   11.69
 -36   6  -1   52.60    8.82
  36   6   1   52.29    8.33
  36  -6   1   48.28    7.72
 -36   6  -1   70.38    8.85
  36   6   1   47.40    9.06
 -36  -6  -1   55.03    9.64
 -36   6  -1   56.12    8.34
 -38   6  -1   88.36   10.05
 -38   6  -1   77.68    9.64
 -38  -6  -1   70.63   10.67
 -38   6  -1   75.27    9.91
  38  -6   1   72.15    9.11
 -40   6  -1   77.17   10.49
 -40  -6  -1   65.52   10.50
 -40   6  -1   88.67   10.37
  40   6   1   78.04   11.48
  40  -6   1   73.16    9.57
 -40   6  -1  100.57   10.98
 -42  -6  -1  116.85   13.79
  42   6   1  108.02   13.71
 -42   6  -1  123.17   12.58
 -42   6  -1  133.05   12.86
 -42   6  -1  122.03   12.97
  42  -6   1  123.37   12.50
 -44   6  -1   47.12    8.88
  44   6   1   30.06    9.21
  44  -6   1   34.70    7.67
 -44   6  -1   34.92    8.25
 -44   6  -1   33.24    8.23
  46   6   1   79.53   12.13
 -46   6  -1   70.22   10.41
 -46   6  -1   61.73   10.37
 -46   6  -1   52.79    9.72
  46  -6   1   41.73    8.51
 -47   7   1   49.51   10.14
 -47   7   1   58.47    9.77
  47  -7  -1   53.72    9.32
  47   7  -1   55.06   11.16
 -47   7   1   54.82    9.53
 -45   7   1    0.54    6.14
 -45   7   1   -3.80    5.88
 -45   7   1   -3.37    5.76
  45  -7  -1   -1.05    5.26
  45   7  -1   -2.77    6.56
 -43   7   1   95.62   11.07
 -43  -7   1   68.07   11.29
 -43   7   1   84.70   10.68
  43   7  -1   88.75   12.46
 -43   7   1  119.99   13.46
  43  -7  -1   98.26   11.25
  41   7  -1   13.16    7.28
 -41  -7   1   11.74    7.43
 -41   7   1   25.85    6.94
 -41   7   1   17.72    7.77
  41  -7  -1    6.28    5.43
 -41   7   1    8.82    6.22
 -39   7   1   71.42    9.35
  39   7  -1   63.40   10.29
  39   7  -1   77.41    9.59
 -39   7   1   90.42   11.49
  39  -7  -1   63.98    8.75
 -39  -7   1   63.16   10.30
 -39   7   1   67.02    9.04
 -37   7   1   -7.69    4.72
 -37   7   1    9.89    5.53
  37   7  -1   -2.09    5.08
 -37   7   1   11.86    6.90
 -37  -7   1   -4.54    6.09
  37  -7  -1    3.30    4.88
  37   7  -1   -0.16    5.36
 -35   7   1   59.25    8.09
  35  -7  -1   51.94    7.77
 -35  -7   1   67.26    9.99
  35   7  -1   41.08    7.33
 -35   7   1   39.37    9.16
 -35   7   1   47.40    7.76
  35   7  -1   60.89    9.53
  33   7  -1    3.40    6.89
 -33   7   1    9.95    7.55
 -33   7   1    8.20    5.32
 -33  -7   1    4.53    6.49
  33   7  -1    6.88    7.23
 -33   7   1   -1.80    4.86
  33   7  -1    7.87    6.39
 -33  -7   1    2.04    6.56
  33  -7  -1    4.95    4.82
  33   7  -1   -2.38    4.90
 -33  -7   1    2.54    7.11
  31   7  -1   52.57    7.86
  31   7  -1   45.96    9.23
  31   7  -1   62.27    9.43
 -31  -7   1   57.16    9.08
  31   7  -1   59.73    9.79
 -31  -7   1   44.80    8.49
 -31   7   1   54.34    7.64
 -31  -7   1   57.23    9.59
 -31   7   1   34.32    8.46
 -31   7   1   59.88    7.62
  31  -7  -1   43.84    7.56
  31  -7  -1   40.18    6.65
 -29  -7   1   -4.51    5.38
  29  -7  -1    1.94    4.08
  29   7  -1   -4.41    4.57
  29   7  -1    6.36    6.71
  29   7  -1    2.24    5.13
 -29   7   1    1.88    6.52
 -29  -7   1   -2.39    6.10
 -29   7   1   -3.05    4.51
 -29  -7   1   -2.15    6.02
  29  -7  -1   -2.47    4.70
 -29   7   1   -1.92    4.58
  29   7  -1   10.61    6.81
 -27  -7   1  200.31   15.25
 -27   7   1  174.34   14.91
  27   7  -1  193.73   14.96
  27  -7  -1  207.36   12.94
 -27   7   1  191.60   12.82
  27  -7  -1  203.63   12.77
  27   7  -1  195.75   13.48
  27   7  -1  213.81   15.85
 -27   7   1  184.02   12.63
 -27  -7   1  214.05   15.76
 -27  -7   1  181.78   14.95
  25   7  -1   -0.50    5.35
 -25  -7   1    3.36    5.36
 -25  -7   1   14.91    6.02
  25  -7  -1    3.45    4.25
 -25   7   1    3.71    5.87
 -25  -7   1   -4.41    4.46
 -25   7   1    2.79    4.03
  25   7  -1    4.46    4.38
  25  -7  -1    2.72    3.33
 -25   7   1   -0.20    4.10
  25   7  -1    2.12    4.88
 -23   7   1  151.03   12.57
 -23  -7   1  140.32   11.83
 -23   7   1  129.39    9.20
  23   7  -1  147.07   11.68
  23  -7  -1  116.99    9.04
  23  -7  -1  141.19    9.17
 -23   7   1  121.18    9.01
  23   7  -1  132.99   11.77
 -23  -7   1  143.17   11.77
 -23  -7   1  134.40   11.79
  23   7  -1  138.88   10.10
  21   7  -1    3.72    5.05
  21   7  -1    1.34    3.59
  21  -7  -1   -2.83    2.57
 -21  -7   1   -3.15    4.34
  21   7  -1    6.30    4.95
 -21  -7   1   -2.00    4.45
 -21   7   1    2.02    3.20
 -21   7   1    8.09    5.45
 -21   7   1    4.03    3.28
  21  -7  -1   -1.45    3.39
  21   7  -1   -5.12    3.81
 -21  -7   1    1.21    4.39
 -19   7   1  113.47    7.53
  19   7  -1  107.12    8.07
 -19  -7   1  101.46    9.65
  19  -7  -1  115.93    7.43
 -19   7   1  110.30   10.29
  19   7  -1  101.82    9.23
 -19  -7   1  106.36    9.49
 -19  -7   1   99.73    9.36
  19  -7  -1   98.99    6.93
 -19   7   1  104.38    7.31
  19   7  -1  114.33   10.15
  19   7  -1  106.87    9.95
  17  -7  -1    0.53    2.76
  17   7  -1   -1.77    4.08
  17   7  -1   -1.03    3.51
  17   7  -1    0.50    3.08
 -17  -7   1    8.17    4.77
 -17   7   1   10.11    5.13
 -17   7   1    0.41    2.73
 -17  -7   1   -0.44    4.15
  17  -7  -1    3.23    2.48
  17   7  -1    3.41    4.62
 -17   7   1    1.89    2.50
 -17  -7   1    5.42    3.94
 -17  -7   1    3.02    3.95
  15   7  -1    5.79    4.42
 -15  -7   1    6.52    4.17
 -15  -7   1    3.42    3.83
 -15  -7   1   -0.61    3.82
  15   7  -1    0.04    4.30
 -15   7   1   -1.02    3.60
 -15  -7   1    2.38    3.59
 -15   7   1    3.44    2.56
  15  -7  -1    1.23    2.05
  15   7  -1    2.60    2.87
  15  -7  -1    5.23    2.64
 -15   7   1    1.35    2.54
  15   7  -1    3.39    3.55
 -13  -7   1    3.90    3.78
  13   7  -1    3.92    3.39
 -13   7   1    1.42    2.20
 -13  -7   1    4.00    3.53
 -13  -7   1   -2.63    3.24
  13  -7  -1   -0.32    1.90
  13   7  -1    1.16    3.90
  13   7  -1   -0.23    2.55
 -13  -7   1    2.35    3.39
  13  -7  -1    1.33    2.17
 -13   7   1   -0.39    3.75
  13   7  -1    0.91    3.89
 -13   7   1   -0.32    2.01
  11   7  -1   14.37    3.66
 -11  -7   1   23.60    4.36
  11   7  -1   16.29    4.16
  11  -7  -1   14.73    2.32
  11  -7  -1   15.66    2.13
  11   7  -1   12.14    2.74
 -11  -7   1   13.02    3.88
 -11  -7   1   17.51    4.12
 -11   7   1   14.32    2.53
  11   7  -1   13.83    4.38
 -11   7   1   14.53    4.66
 -11   7   1   16.36    2.74
 -11  -7   1   23.73    3.71
 -11  -7   1   13.43    4.31
  -9  -7   1   -1.25    2.90
   9   7  -1   -2.78    3.33
   9   7  -1   -1.99    2.47
   9   7  -1   -1.26    1.79
  -9   7   1   -2.14    1.92
  -9  -7   1    2.88    2.64
  -9   7   1    0.65    1.89
  -9  -7   1   -4.32    3.04
  -9  -7   1    1.41    2.98
  -9  -7   1    5.61    3.60
  -9   7   1    6.94    4.30
   9   7  -1   -0.52    3.00
  -7   7   1   13.13    2.45
  -7  -7   1    8.24    3.56
   7   7  -1    3.64    3.18
   7  -7  -1    6.91    1.97
  -7   7   1   11.66    2.36
  -7  -7   1   11.64    2.74
  -7  -7   1    8.99    3.23
  -7  -7   1    9.00    3.11
  -7   7   1    8.28    4.10
   7   7  -1    2.33    2.93
  -7  -7   1   11.80    3.44
  -5   7   1   28.41    4.67
   5   7  -1   24.93    3.34
   5  -7  -1   23.57    2.75
  -5   7   1   23.54    3.13
  -5  -7   1   26.36    3.65
   5   7  -1   30.61    4.30
  -5   7   1   23.51    3.07
   5   7  -1   28.77    4.01
  -5   7   1   26.08    3.18
  -5  -7   1   20.99    2.84
  -5  -7   1   23.46    3.93
  -5  -7   1   23.92    3.58
   5  -7  -1   23.01    2.71
  -5  -7   1   25.03    3.61
  -3   7   1    2.89    2.52
   3   7  -1    7.31    3.00
   3   7  -1    7.95    2.11
   3  -7  -1    2.52    1.83
   3  -7  -1    2.97    2.44
  -3   7   1   11.36    2.62
  -3  -7   1    8.53    2.62
   3  -7  -1    5.85    1.89
  -3   7   1    3.16    3.29
   3  -7  -1    5.97    2.36
  -3  -7   1    8.31    3.06
  -3  -7   1    6.60    2.52
   3   7  -1    6.32    2.10
   3   7  -1    7.16    2.84
  -3  -7   1   10.19    2.56
   1  -7  -1   28.02    3.51
   1  -7  -1   33.84    5.00
  -1  -7   1   29.46    3.62
  -1  -7   1   33.77    2.93
   1  -7  -1   32.76    3.34
  -1   7   1   32.03    2.78
  -1  -7   1   32.36    3.28
  -1  -7   1   30.70    2.98
  -1   7   1   33.19    3.72
  -1   7   1   34.42    2.80
  -1   7   1   24.45    4.57
   1  -7  -1   32.43    3.86
  -1   7   1   29.18    3.78
   1   7  -1   27.23    3.49
   1   7  -1   37.19    3.80
   1  -7  -1   34.47    3.33
  -1   7  -1   64.21    4.42
  -1  -7  -1   61.85    6.06
  -1  -7  -1   60.42    5.13
   1   7   1   61.62    5.20
  -1  -7  -1   60.09    4.83
   1  -7   1   62.39    4.13
  -1   7  -1   54.67    4.14
   1   7   1   55.41    5.75
   1   7   1   62.75    4.66
  -1  -7  -1   59.49    3.80
   1  -7   1   58.23    3.98
  -1  -7  -1   66.44    5.28
   1   7   1   65.03    4.55
   1   7   1   70.02    5.57
   1  -7   1   63.17    3.98
  -1  -7  -1   50.35    4.67
  -3  -7  -1  132.80    8.25
  -3  -7  -1  129.01    8.55
  -3  -7  -1  149.26    7.45
   3   7   1  138.22    8.74
   3   7   1  146.89    8.07
  -3   7  -1  136.09    6.81
  -3  -7  -1  138.93    9.07
  -3   7  -1  128.69    6.71
  -3   7  -1  149.91   10.31
  -3  -7  -1  132.09    8.15
  -3  -7  -1  135.60    8.53
   3   7   1  144.10    8.82
  -5  -7  -1    0.48    3.01
  -5  -7  -1    3.47    2.40
  -5  -7  -1   -2.34    2.80
  -5   7  -1   -1.46    3.27
  -5  -7  -1   -0.97    2.95
   5   7   1    1.18    2.81
  -5  -7  -1   -1.76    2.83
  -5  -7  -1   -0.23    2.99
   5   7   1   -3.95    3.05
  -7  -7  -1   47.52    5.63
   7   7   1   48.80    5.68
  -7  -7  -1   52.25    5.40
   7   7   1   48.55    5.11
  -7  -7  -1   60.01    5.66
   7   7   1   46.02    3.80
  -7  -7  -1   47.70    4.66
  -7  -7  -1   62.67    5.61
   7   7   1   47.80    5.76
  -7  -7  -1   49.44    5.34
  -7   7  -1   45.34    5.85
   9   7   1   21.59    4.37
  -9  -7  -1   11.91    3.30
  -9  -7  -1   22.76    4.61
  -9  -7  -1   13.64    3.86
   9   7   1   20.21    4.13
   9   7   1   14.04    4.31
  -9   7  -1   19.21    4.81
   9   7   1   18.26    3.06
  -9  -7  -1   14.31    3.70
  -9  -7  -1   10.71    3.73
  -9  -7  -1   17.14    4.25
 -11   7  -1    7.97    4.08
  11   7   1   -4.46    3.44
 -11  -7  -1    1.37    2.88
  11   7   1    2.14    2.77
 -11  -7  -1    3.69    3.66
  11   7   1    6.23    3.60
 -11  -7  -1   -2.15    3.26
  11   7   1    2.69    3.91
 -11  -7  -1   -0.08    3.49
 -11  -7  -1    2.10    3.78
 -13  -7  -1    5.24    3.94
 -13  -7  -1    0.70    3.15
  13   7   1    8.54    3.34
  13   7   1    5.95    3.53
 -13  -7  -1   -0.55    3.72
  13   7   1   15.57    4.96
 -13  -7  -1    0.95    3.36
  13   7   1   10.20    4.40
 -13  -7  -1   -1.13    3.81
 -13   7  -1   10.33    4.65
 -15  -7  -1    3.54    4.39
  15  -7   1    6.89    1.90
  15   7   1    5.48    4.74
 -15  -7  -1    8.95    4.16
 -15   7  -1    3.41    4.08
 -15   7  -1    8.00    2.51
  15   7   1   13.17    4.90
  15   7   1    1.85    3.61
 -15   7  -1    3.89    2.41
  15   7   1    3.16    3.31
 -15  -7  -1    9.83    4.34
 -15  -7  -1    4.86    3.52
 -15  -7  -1    5.25    4.25
 -17   7  -1    6.69    3.02
  17  -7   1    1.64    2.19
 -17  -7  -1    8.20    4.65
  17   7   1    2.53    4.51
  17  -7   1   10.56    2.88
  17   7   1    8.13    3.75
  17   7   1    2.72    3.88
 -17   7  -1    7.55    2.83
 -17  -7  -1    8.77    4.72
 -17   7  -1    2.18    4.47
 -17  -7  -1    4.73    4.47
  17   7   1    4.86    4.85
 -19  -7  -1   18.81    5.48
 -19  -7  -1    3.54    4.34
  19   7   1    9.80    4.57
 -19   7  -1   14.12    3.41
  19   7   1   11.26    5.44
 -19  -7  -1    8.55    4.97
  19  -7   1    6.89    3.09
 -19   7  -1    9.46    5.27
 -19   7  -1    7.99    3.38
  19  -7   1   10.63    2.86
  19   7   1   12.79    5.34
  19   7   1   17.70    4.50
  21  -7   1    3.62    2.91
 -21  -7  -1    0.12    4.92
 -21   7  -1    4.39    5.20
 -21   7  -1    1.31    3.20
 -21  -7  -1   12.56    5.48
  21  -7   1    4.84    3.47
 -21  -7  -1   -5.75    4.26
  21   7   1    6.42    4.43
  21   7   1    5.29    4.11
 -21   7  -1    3.90    3.38
  21   7   1    5.15    5.32
  23   7   1   -0.91    5.28
 -23  -7  -1   -7.42    4.49
  23  -7   1    3.49    3.81
 -23  -7  -1    0.45    4.94
  23   7   1   -5.79    3.93
 -23  -7  -1    2.70    5.29
  23   7   1   -1.16    4.02
 -23   7  -1   -2.48    3.57
  23  -7   1   -4.26    2.98
 -23   7  -1   -3.56    3.51
 -23   7  -1   -5.66    4.46
  25  -7   1   10.81    4.08
 -25  -7  -1    7.42    5.68
  25  -7   1   10.52    4.48
  25   7   1    9.82    5.37
 -25  -7  -1    2.95    5.88
  25   7   1    0.19    5.72
 -25   7  -1   -1.16    4.03
 -25   7  -1    6.40    4.42
  25   7   1    2.89    4.66
 -25   7  -1   -1.99    5.49
 -25  -7  -1    5.45    5.58
  27   7   1   -8.52    4.15
 -27  -7  -1    3.65    6.20
 -27   7  -1    1.34    5.66
  27   7   1   -2.83    4.46
 -27   7  -1    6.12    4.56
 -27   7  -1   -0.74    4.35
 -27  -7  -1   -5.57    5.01
  27   7   1  -10.87    5.34
 -27  -7  -1    4.66    5.70
  27   7   1   -2.41    5.79
  27  -7   1   -0.39    3.76
  27  -7   1   10.07    5.07
 -29  -7  -1   21.39    7.09
  29   7   1    9.20    6.96
 -29  -7  -1   12.19    6.84
 -29   7  -1   12.13    6.45
 -29  -7  -1   10.06    6.84
  29  -7   1    4.70    5.26
  29  -7   1   14.09    4.75
 -29   7  -1    5.86    5.02
  29   7   1   31.19    8.16
  29   7   1   15.61    5.76
 -29   7  -1   19.73    5.50
  29   7   1   19.22    6.58
 -31  -7  -1   20.67    7.50
 -31  -7  -1    0.59    6.59
 -31   7  -1   22.06    6.04
 -31   7  -1   16.07    5.80
 -31  -7  -1    6.49    6.72
  31  -7   1    9.34    4.98
  31   7   1   11.03    7.48
  31   7   1   10.93    6.38
  31   7   1   13.90    5.83
  31   7   1   24.04    8.40
 -31   7  -1   16.34    6.93
  31  -7   1   13.10    5.93
  33   7   1   14.00    6.75
 -33   7  -1   11.13    6.66
  33   7   1    1.09    7.00
  33   7   1   12.72    5.99
 -33   7  -1   14.83    5.72
 -33  -7  -1   14.26    7.56
  33  -7   1   12.04    5.27
 -33  -7  -1    4.79    6.87
 -33   7  -1   12.84    5.73
 -35   7  -1   -6.23    4.51
 -35   7  -1   -0.10    5.53
  35  -7   1    1.87    4.88
 -35   7  -1    9.71    5.43
 -35  -7  -1    8.47    6.69
  35   7   1   -5.13    4.69
  35   7   1    7.18    6.23
 -37   7  -1   29.64    7.00
 -37  -7  -1   27.22    8.16
  37   7   1   27.14    7.86
  37   7   1   32.66    7.20
  37  -7   1   21.09    6.06
 -37   7  -1   24.85    6.58
 -37   7  -1   31.10    7.55
 -39   7  -1    3.90    5.41
 -39   7  -1    0.63    5.50
 -39   7  -1   -7.24    5.10
  39   7   1    9.94    6.96
  39  -7   1   -5.59    4.32
 -39  -7  -1   -0.88    6.10
 -41   7  -1   37.30    8.66
 -41   7  -1   31.13    7.20
 -41  -7  -1   40.13    9.51
  41  -7   1   17.77    6.14
  41   7   1   47.34    9.63
 -41   7  -1   37.72    7.95
 -43   7  -1   -2.74    5.81
  43  -7   1    3.85    5.51
 -43   7  -1    5.17    6.30
 -43   7  -1    0.84    5.91
  43   7   1    1.25    6.44
 -45   7  -1   28.68    7.94
 -45   7  -1   28.78    7.44
  45   7   1   13.66    7.74
 -45   7  -1   37.78    8.66
  45  -7   1   16.62    6.67
 -46   8   1   19.17    7.23
 -46   8   1   31.39    8.97
  46   8  -1   20.42    8.42
 -46   8   1   25.49    7.79
  46  -8  -1    9.31    6.62
 -44   8   1   47.68    9.67
 -44   8   1   34.83    7.95
  44   8  -1   41.28    9.79
  44  -8  -1   24.03    6.98
 -44   8   1   49.70    8.71
 -44  -8   1   36.56    9.68
 -42  -8   1   94.41   12.31
 -42   8   1   94.97   10.75
 -42   8   1   81.02   10.25
  42  -8  -1   61.54    9.06
 -42   8   1  105.60   12.74
  42   8  -1   69.33   11.75
 -40   8   1   88.26   10.30
 -40  -8   1   79.75   11.77
  40  -8  -1   87.07   10.01
 -40   8   1   83.83   10.01
  40   8  -1   81.18   11.80
 -40   8   1   88.22   11.76
 -38  -8   1   53.46    9.66
 -38   8   1   67.26   10.54
  38   8  -1   74.18    9.35
 -38   8   1   47.78    7.83
  38  -8  -1   53.84    7.80
  38   8  -1   46.92    9.35
 -38   8   1   70.27    8.74
 -36   8   1   10.62    5.60
 -36   8   1   17.69    7.39
  36  -8  -1   12.20    5.42
  36   8  -1    3.52    5.68
 -36   8   1    4.43    5.23
  36   8  -1   16.97    5.99
 -36  -8   1    8.95    6.77
  34   8  -1   -5.82    4.61
 -34   8   1    6.15    7.06
 -34  -8   1    2.11    6.76
  34   8  -1   -2.90    5.24
  34  -8  -1    0.99    4.57
 -34   8   1   -7.52    4.48
 -34   8   1    1.90    4.91
  32  -8  -1   14.67    5.35
 -32  -8   1    9.95    6.67
 -32   8   1   21.68    6.06
 -32   8   1   -1.01    6.44
 -32  -8   1   15.53    7.62
  32   8  -1   24.86    8.24
  32   8  -1    4.56    5.42
  32   8  -1    4.15    7.12
  32   8  -1   18.31    7.06
 -32   8   1   10.55    5.20
 -30  -8   1  132.54   12.95
  30   8  -1  139.83   13.86
  30   8  -1  134.81   11.26
  30   8  -1  117.69   12.35
 -30   8   1  135.97   13.64
 -30  -8   1  141.75   13.62
  30  -8  -1  129.55   10.83
 -30   8   1  139.49   10.85
 -30  -8   1  126.44   13.00
 -30   8   1  150.66   11.15
  30  -8  -1  134.09   10.52
  28   8  -1  101.29   10.95
 -28   8   1  107.82    9.21
 -28   8   1  105.07    9.25
  28   8  -1  108.65    9.89
  28  -8  -1  101.92    9.45
 -28   8   1  101.25   11.71
 -28  -8   1  116.05   11.62
  28   8  -1  120.07   12.47
 -28  -8   1  121.37   12.21
  28  -8  -1  111.53    9.07
 -28  -8   1  112.87   11.80
  26   8  -1  165.08   12.11
 -26  -8   1  172.59   14.19
  26  -8  -1  181.92   11.75
  26   8  -1  177.50   14.74
 -26   8   1  178.84   14.73
 -26   8   1  190.77   11.91
 -26   8   1  170.59   11.50
 -26  -8   1  167.36   14.22
  26  -8  -1  171.05   11.29
  26   8  -1  187.56   14.24
  24   8  -1   74.93    7.47
  24   8  -1   53.88    8.64
 -24   8   1   61.06    6.39
 -24  -8   1   54.05    8.36
 -24   8   1   65.14    6.52
 -24  -8   1   62.39    8.38
  24  -8  -1   63.94    6.10
  24   8  -1   64.03    8.33
 -24  -8   1   59.20    8.68
  24  -8  -1   57.06    6.54
 -24   8   1   70.47    9.57
  24   8  -1   59.21    9.10
  22   8  -1  183.15   11.64
  22   8  -1  167.48   12.83
  22   8  -1  169.81   13.57
  22  -8  -1  174.60   10.51
 -22   8   1  172.43   13.91
  22  -8  -1  170.86   10.24
 -22  -8   1  160.98   12.82
 -22  -8   1  162.61   12.96
 -22   8   1  163.64   10.36
 -22  -8   1  165.45   13.45
  22   8  -1  171.83   13.60
 -22   8   1  175.73   10.59
  20   8  -1   34.00    6.90
 -20   8   1   33.09    6.90
 -20   8   1   31.79    4.45
 -20  -8   1   27.30    6.13
 -20  -8   1   20.48    5.61
 -20  -8   1   26.38    6.20
  20  -8  -1   34.18    4.06
 -20   8   1   28.14    4.24
  20   8  -1   32.89    5.79
  20   8  -1   27.80    4.87
  20   8  -1   22.99    6.29
  20  -8  -1   30.03    4.49
 -18  -8   1  111.68    9.75
 -18   8   1  121.85    7.63
 -18  -8   1  142.90   10.70
 -18   8   1  115.74    7.52
  18   8  -1  109.66   10.37
 -18  -8   1  127.25   10.47
  18   8  -1  108.48    8.28
 -18  -8   1  116.91   10.51
  18   8  -1  109.76    9.62
  18  -8  -1  123.35    7.50
  18  -8  -1  126.41    7.37
  18   8  -1  134.72   10.92
 -18   8   1  115.59   10.80
 -16   8   1   12.97    2.92
 -16  -8   1   16.04    4.68
  16  -8  -1   13.48    2.67
  16  -8  -1   17.48    3.18
 -16  -8   1   15.64    5.20
 -16  -8   1   15.15    5.01
  16   8  -1   17.16    5.24
  16   8  -1   18.40    3.82
  16   8  -1   19.81    4.74
 -16   8   1   13.32    2.95
 -16  -8   1   18.58    4.83
 -16   8   1    6.17    4.79
  16   8  -1   13.14    5.30
  14   8  -1   48.16    6.68
  14   8  -1   45.14    5.70
 -14  -8   1   45.15    6.10
  14  -8  -1   44.53    3.68
 -14  -8   1   57.75    6.45
 -14   8   1   41.35    6.90
 -14   8   1   47.45    4.14
 -14  -8   1   52.72    6.84
  14   8  -1   51.90    4.83
 -14  -8   1   62.24    6.66
  14   8  -1   56.72    6.96
  14  -8  -1   57.43    4.04
 -14   8   1   48.58    4.16
 -12  -8   1   92.64    8.25
  12   8  -1   94.74    8.39
 -12  -8   1   93.80    7.90
  12   8  -1  101.97    8.64
 -12  -8   1   89.97    8.28
 -12   8   1   93.54    5.83
 -12  -8   1   99.50    8.20
  12   8  -1   98.90    7.71
 -12  -8   1  114.20    7.61
  12   8  -1   90.53    6.04
 -12   8   1  104.25    5.84
 -12   8   1   88.85    9.01
 -10   8   1  353.99   16.25
  10   8  -1  376.12   15.63
  10   8  -1  350.28   18.31
  10   8  -1  382.07   19.60
 -10  -8   1  361.18   18.49
 -10  -8   1  368.59   17.48
 -10  -8   1  352.39   18.52
 -10  -8   1  325.08   18.85
 -10   8   1  351.33   20.22
  10   8  -1  367.02   19.26
 -10   8   1  374.44   16.32
 -10  -8   1  379.02   19.14
   8   8  -1   79.84    7.38
   8  -8  -1  103.01    5.40
  -8  -8   1   94.13    6.41
  -8  -8   1  103.91    7.84
  -8   8   1   95.10    5.73
  -8  -8   1  103.64    7.34
   8   8  -1   86.76    7.60
  -8   8   1   97.53    5.69
  -8   8   1   84.06    8.22
  -8  -8   1  103.84    7.62
  -8  -8   1   92.90    7.07
   8  -8  -1  101.49    5.39
  -6  -8   1    2.47    2.87
   6  -8  -1    1.85    2.00
  -6  -8   1    3.96    2.78
  -6   8   1    3.12    2.29
  -6  -8   1    4.06    2.78
   6   8  -1    7.24    3.16
  -6  -8   1    3.18    2.33
  -6  -8   1    4.36    3.40
  -6   8   1    3.75    2.29
   6  -8  -1    3.93    2.09
   6   8  -1    5.14    3.20
   6   8  -1   10.51    2.84
  -6   8   1    7.98    4.34
  -4  -8   1   59.43    5.04
  -4   8   1   81.29    5.31
   4  -8  -1   68.28    4.81
  -4  -8   1   73.11    4.26
   4   8  -1   77.59    6.21
  -4  -8   1   76.43    5.71
  -4  -8   1   65.60    5.88
   4   8  -1   67.39    4.76
   4   8  -1   71.65    5.98
  -4   8   1   53.75    6.58
  -4  -8   1   64.78    5.09
  -4   8   1   68.98    5.16
   4  -8  -1   67.51    4.78
   2  -8  -1   66.34    5.34
  -2   8   1   68.20    7.22
   2  -8  -1   77.26    4.73
   2  -8  -1   71.69    5.34
   2  -8  -1   73.51    4.66
  -2   8   1   82.51    5.78
   2   8  -1   71.21    5.73
  -2  -8   1   73.98    5.40
  -2  -8   1   79.37    4.95
  -2   8   1   75.49    5.59
   2   8  -1   73.00    5.61
  -2  -8   1   83.66    5.00
  -2  -8   1   79.59    5.74
   0  -8  -1   13.00    3.42
   0   8   1   14.67    3.09
   0  -8   1   13.48    2.48
   0   8   1   13.24    4.21
   0  -8   1   15.30    2.90
   0   8   1   13.99    2.33
   0  -8  -1   17.27    2.89
   0   8   1   16.18    3.31
   0   8  -1   14.84    3.04
   0  -8  -1   11.60    2.77
   0  -8  -1   16.30    3.24
   0   8  -1   12.80    2.84
  -2  -8  -1   46.22    4.69
   2   8   1   36.58    3.72
  -2   8  -1   39.25    3.52
  -2  -8  -1   36.04    4.15
  -2  -8  -1   47.68    4.98
   2  -8   1   40.38    3.23
   2   8   1   38.72    4.82
  -2   8  -1   35.37    3.30
  -2  -8  -1   39.86    3.39
  -2  -8  -1   40.03    4.17
   2   8   1   36.76    4.59
   2  -8   1   34.38    3.09
   4   8   1   71.19    6.43
   4   8   1   74.75    5.71
  -4  -8  -1   73.32    5.90
   4   8   1   74.27    6.39
  -4   8  -1   77.99    4.43
  -4  -8  -1   75.11    6.19
  -4  -8  -1   72.64    5.24
  -4  -8  -1   75.63    6.09
  -4   8  -1   78.19    7.85
  -4  -8  -1   69.36    6.31
  -6  -8  -1  349.63   17.61
   6   8   1  352.57   18.41
  -6  -8  -1  344.30   16.59
  -6  -8  -1  367.89   18.47
  -6  -8  -1  353.08   18.11
   6   8   1  368.08   18.46
  -6  -8  -1  341.08   17.73
   8   8   1   51.82    6.14
  -8   8  -1   42.53    6.19
   8   8   1   54.89    3.88
  -8  -8  -1   47.67    4.94
   8   8   1   44.75    5.25
  -8  -8  -1   64.63    6.18
  -8  -8  -1   43.41    5.35
   8   8   1   44.34    6.01
  -8  -8  -1   47.22    5.49
  -8  -8  -1   44.44    5.69
  10   8   1    1.23    4.09
 -10  -8  -1    8.05    3.95
  10   8   1   10.61    4.38
 -10  -8  -1   10.08    3.54
 -10  -8  -1   19.23    4.48
 -10  -8  -1    9.99    4.40
 -10   8  -1    8.59    4.32
  10   8   1   11.26    2.98
 -10  -8  -1   17.66    4.29
  10   8   1    8.74    3.85
 -12  -8  -1  164.31   11.50
  12   8   1  154.60   10.85
 -12  -8  -1  159.77   10.20
 -12  -8  -1  188.92   11.81
  12   8   1  165.30    9.44
 -12  -8  -1  147.00   10.98
 -12  -8  -1  157.30   10.97
  12   8   1  159.12   11.68
  12   8   1  172.85   11.77
 -12   8  -1  165.17   12.19
  14   8   1    8.37    4.29
 -14  -8  -1   13.98    5.18
 -14  -8  -1   21.20    4.73
  14   8   1   25.17    5.46
 -14   8  -1   17.93    5.27
  14   8   1   12.84    3.60
 -14  -8  -1   19.76    4.28
 -14  -8  -1   17.84    4.86
 -14  -8  -1   15.97    5.01
  14   8   1   24.25    5.74
 -16   8  -1   20.13    3.03
 -16  -8  -1   16.95    4.99
  16   8   1   14.10    4.40
 -16  -8  -1   23.34    5.44
  16   8   1   16.30    4.02
  16   8   1   12.63    5.07
 -16   8  -1   21.34    5.56
 -16   8  -1   17.50    2.85
 -16  -8  -1   15.95    5.17
 -16  -8  -1   25.86    5.22
 -16  -8  -1   16.01    4.42
  16   8   1   17.21    5.42
  18   8   1  108.23   10.18
  18  -8   1   93.91    6.08
 -18   8  -1  100.24    9.85
 -18  -8  -1   92.57    9.18
 -18  -8  -1   87.30    9.38
 -18  -8  -1  110.91    9.86
  18   8   1  108.96   10.10
  18   8   1   92.98    8.94
 -18   8  -1   93.58    6.43
  18   8   1  106.46    8.15
 -18   8  -1  115.48    6.73
  18  -8   1   93.68    5.98
  20   8   1  108.99   10.01
  20  -8   1  115.27    7.16
 -20   8  -1  107.39    7.43
  20   8   1  111.40    8.85
 -20  -8  -1  107.36   10.25
 -20  -8  -1  108.09   10.32
 -20   8  -1   96.93   10.09
  20  -8   1  113.81    7.21
 -20   8  -1  103.20    7.30
  20   8   1  108.57   10.64
  20   8   1  107.70   10.81
 -20  -8  -1  113.91   10.38
 -22  -8  -1  224.74   15.56
 -22  -8  -1  217.55   15.42
 -22   8  -1  206.39   12.01
 -22   8  -1  222.10   12.30
  22   8   1  200.08   15.27
  22  -8   1  223.19   11.95
  22   8   1  221.23   13.60
  22  -8   1  202.49   11.81
  22   8   1  233.96   16.23
 -22  -8  -1  201.61   15.31
 -22   8  -1  207.19   15.42
  22   8   1  216.14   15.26
  24   8   1  161.56   13.05
  24   8   1  166.22   13.90
 -24   8  -1  134.79    9.87
 -24   8  -1  132.91   12.80
 -24  -8  -1  140.50   12.96
  24   8   1  145.16   11.21
 -24  -8  -1  161.36   13.23
  24  -8   1  144.36    9.84
 -24  -8  -1  173.87   13.57
 -24   8  -1  159.00   10.26
  24  -8   1  159.72   10.08
  26   8   1  345.44   21.00
  26  -8   1  326.91   17.25
 -26   8  -1  295.63   17.00
  26   8   1  335.37   21.45
 -26  -8  -1  321.12   20.71
 -26  -8  -1  307.25   20.63
 -26   8  -1  316.93   17.35
 -26   8  -1  303.58   20.39
  26  -8   1  300.74   17.02
  26   8   1  321.02   18.49
 -28   8  -1   56.94    8.97
 -28  -8  -1   43.89    8.87
  28   8   1   49.27    8.40
  28   8   1   57.12    9.71
  28  -8   1   45.75    6.24
 -28   8  -1   48.55    6.67
 -28  -8  -1   49.03    8.84
  28   8   1   58.51    7.68
  28  -8   1   46.02    6.77
 -28  -8  -1   61.04    9.52
 -28   8  -1   45.21    6.62
  30   8   1   -3.86    6.50
 -30   8  -1   -4.08    4.61
 -30  -8  -1   -5.17    6.40
 -30  -8  -1    5.41    6.31
  30   8   1   -3.11    5.05
  30  -8   1    0.13    4.14
  30   8   1   -2.57    6.87
 -30   8  -1    1.40    6.52
  30   8   1    8.36    6.11
 -30  -8  -1    1.50    6.44
  30  -8   1   -4.96    5.01
 -30   8  -1   -6.25    4.52
  32   8   1    8.11    5.60
 -32   8  -1    6.27    5.26
 -32  -8  -1    5.33    6.70
 -32   8  -1    9.89    5.14
  32   8   1   -1.03    6.72
  32   8   1    9.64    6.22
 -32   8  -1    7.29    6.33
  32  -8   1    7.80    4.89
  34   8   1    4.61    5.95
 -34   8  -1    1.72    4.96
  34  -8   1    1.79    4.23
 -34  -8  -1    5.57    6.72
  34   8   1   10.08    5.44
 -34   8  -1    7.24    5.03
 -34   8  -1    5.60    5.87
 -36   8  -1   46.04    8.61
 -36   8  -1   55.66    7.91
  36   8   1   49.50    9.02
  36   8   1   42.05    7.69
 -36   8  -1   31.53    6.73
 -36  -8  -1   46.15    9.40
  36  -8   1   50.66    7.39
  38   8   1   79.86   11.83
 -38  -8  -1   75.25   11.47
  38  -8   1   96.26   10.06
 -38   8  -1  111.01   10.72
 -38   8  -1   85.17    9.84
 -38   8  -1  105.76   12.13
 -40  -8  -1   36.94    9.51
 -40   8  -1   54.26    8.21
 -40   8  -1   40.60    9.00
  40  -8   1   59.80    8.31
  40   8   1   56.32   10.35
 -40   8  -1   46.29    8.11
 -42   8  -1   34.06    7.90
 -42   8  -1   60.14    9.92
 -42   8  -1   38.39    7.86
  42  -8   1   25.33    6.61
  42   8   1   38.72    9.41
 -42  -8  -1   34.15    9.39
  44   8   1   31.38    9.13
  44  -8   1   19.24    6.54
 -44   8  -1   34.05    7.61
 -44   8  -1   32.30    7.97
 -44   8  -1   26.12    8.05
  45   9  -1    0.41    6.90
 -45   9   1   11.40    6.57
 -45   9   1    1.74    6.06
 -45   9   1    7.46    7.53
  45  -9  -1   -0.46    5.36
 -45  -9   1    7.72    8.23
 -43   9   1    1.55    5.65
  43  -9  -1   -2.61    4.69
  43   9  -1    8.07    7.37
 -43   9   1    1.87    7.21
 -43   9   1   -3.35    5.48
 -43  -9   1   -0.60    6.96
 -41   9   1   -0.82    6.39
 -41   9   1   -4.03    5.35
  41  -9  -1    0.16    4.98
  41   9  -1    1.47    6.44
 -41   9   1    0.31    5.55
 -41  -9   1    0.30    7.28
 -39  -9   1   33.14    9.05
  39   9  -1    0.58    5.20
 -39   9   1   19.70    6.13
 -39   9   1    7.10    5.76
  39  -9  -1    8.82    5.24
 -39   9   1    8.91    7.22
  39   9  -1   11.11    6.95
 -37   9   1   12.79    5.66
  37   9  -1   20.14    6.11
  37  -9  -1    7.99    4.89
  37   9  -1   10.01    6.82
 -37   9   1   11.32    5.75
 -37  -9   1    6.84    6.77
 -37   9   1   18.49    7.49
  35   9  -1    3.65    5.02
 -35  -9   1   -4.17    5.72
 -35   9   1    1.95    4.93
  35  -9  -1    5.01    4.44
 -35   9   1   15.79    7.39
 -35   9   1    8.39    5.12
  35   9  -1    1.34    5.70
  33   9  -1   13.72    6.40
 -33   9   1    0.38    4.92
  33   9  -1   18.37    5.96
 -33  -9   1   18.62    7.65
  33  -9  -1   11.69    4.94
 -33   9   1    7.62    5.05
 -33   9   1   18.97    7.71
  31  -9  -1   16.53    5.96
  31   9  -1   26.64    7.36
 -31   9   1    2.56    4.90
  31  -9  -1   11.82    4.89
 -31  -9   1   16.99    7.22
 -31   9   1    8.30    6.90
 -31  -9   1   -0.63    6.68
  31   9  -1   13.33    7.78
 -31   9   1   10.47    5.30
  31   9  -1    9.87    5.69
  29  -9  -1    2.36    4.97
 -29   9   1    9.47    4.82
  29   9  -1    7.86    5.56
 -29  -9   1   15.59    7.10
  29  -9  -1    0.09    4.06
 -29   9   1    7.44    7.15
 -29  -9   1    6.37    7.06
 -29   9   1    8.66    4.86
  29   9  -1   16.15    7.70
 -29  -9   1   14.71    6.80
  29   9  -1   12.88    5.38
 -27   9   1   73.35    7.37
 -27  -9   1   84.03   10.35
  27   9  -1   83.02   10.62
  27   9  -1   75.84    8.24
  27  -9  -1   73.39    7.47
 -27  -9   1   74.86    9.99
 -27  -9   1   86.94   10.24
 -27   9   1   66.52   10.22
  27   9  -1   74.18   10.48
 -27   9   1   75.14    7.48
  27   9  -1   76.14    9.68
  27  -9  -1   59.00    6.68
 -25  -9   1    0.29    5.22
 -25  -9   1    4.51    6.29
  25  -9  -1    1.76    3.41
 -25   9   1    3.10    4.03
  25   9  -1   -7.45    5.44
 -25   9   1    1.78    6.16
 -25   9   1   -3.93    3.88
  25   9  -1   -2.01    5.78
 -25  -9   1   -3.29    5.75
  25   9  -1   -1.89    4.11
  25  -9  -1    1.94    4.26
  25   9  -1    3.65    4.85
 -23  -9   1    8.80    6.34
 -23  -9   1   12.93    5.60
 -23   9   1    4.32    6.00
 -23   9   1   25.08    4.40
  23   9  -1   39.98    8.04
 -23  -9   1    7.78    5.86
  23   9  -1   10.59    4.53
  23  -9  -1   10.83    4.34
  23  -9  -1    7.75    3.42
  23   9  -1    6.52    5.11
 -23   9   1   10.05    4.00
  23   9  -1   22.57    6.91
  21   9  -1    0.39    5.23
  21   9  -1    4.09    4.53
  21  -9  -1   -2.08    2.64
  21   9  -1    2.62    5.56
 -21   9   1    0.05    3.18
  21   9  -1   -3.29    3.45
 -21   9   1   -0.77    5.05
 -21   9   1    7.12    3.31
 -21  -9   1  -11.62    4.14
 -21  -9   1   -0.20    4.95
 -21  -9   1    1.12    4.72
  21  -9  -1    1.76    3.52
  19  -9  -1   16.57    3.15
  19  -9  -1   22.48    3.78
 -19  -9   1   20.38    5.77
 -19   9   1   17.64    3.52
 -19  -9   1   21.71    5.69
 -19   9   1   11.62    5.62
  19   9  -1   24.01    6.44
 -19   9   1   20.71    3.74
  19   9  -1    6.64    5.19
  19   9  -1   17.81    4.21
 -19  -9   1   19.76    5.88
  19   9  -1   21.69    5.10
  17  -9  -1    0.55    2.20
  17   9  -1    6.47    5.16
 -17  -9   1   10.78    4.57
  17   9  -1   -1.39    3.89
 -17   9   1    6.36    5.39
 -17   9   1    4.89    2.57
 -17  -9   1    1.72    4.77
  17   9  -1    5.66    3.41
  17  -9  -1    0.58    2.57
 -17  -9   1    6.36    4.58
  17   9  -1   10.41    5.17
 -17  -9   1    7.22    4.76
 -17   9   1    3.18    2.74
 -15  -9   1    2.44    3.84
 -15   9   1    4.02    2.45
  15  -9  -1    3.61    2.42
  15   9  -1    0.14    2.72
  15  -9  -1    8.38    2.21
  15   9  -1   -2.22    4.00
 -15  -9   1   11.88    5.16
 -15   9   1    3.59    2.43
 -15   9   1    4.73    4.85
  15   9  -1    2.00    3.48
 -15  -9   1    7.62    4.51
  15   9  -1   -0.88    4.17
 -15  -9   1    8.82    4.26
 -13  -9   1   21.72    5.42
 -13  -9   1   22.21    4.82
 -13   9   1   16.72    2.76
 -13  -9   1   25.67    5.12
  13  -9  -1   16.67    2.38
  13   9  -1   25.22    4.66
 -13   9   1   19.48    2.95
 -13  -9   1   27.49    4.42
  13   9  -1   21.64    3.16
 -13   9   1   21.39    5.83
 -13  -9   1   18.49    4.78
  13   9  -1   18.07    4.95
  13   9  -1   19.50    5.28
 -11  -9   1   29.85    5.74
 -11   9   1   28.47    5.60
 -11  -9   1   32.67    4.51
 -11   9   1   33.38    3.21
 -11  -9   1   28.41    4.84
  11   9  -1   23.64    5.30
  11   9  -1   36.93    5.87
 -11  -9   1   35.69    5.27
 -11  -9   1   37.39    5.32
 -11   9   1   31.83    3.35
  -9  -9   1   38.60    5.10
  -9   9   1   37.05    3.57
   9   9  -1   34.05    5.46
  -9  -9   1   25.70    4.01
  -9   9   1   29.13    3.23
   9  -9  -1   32.90    3.09
  -9   9   1   28.03    5.95
  -9  -9   1   35.26    4.86
  -9  -9   1   28.10    5.37
   9   9  -1   35.82    5.47
  -9  -9   1   33.72    4.75
  -7   9   1  153.98    8.71
  -7   9   1  174.34    9.00
  -7  -9   1  173.98    9.31
   7   9  -1  177.26    9.87
  -7  -9   1  171.31   10.95
   7  -9  -1  155.77    8.55
   7   9  -1  151.39   10.58
   7   9  -1  173.37   11.08
  -7  -9   1  175.85   10.69
   7  -9  -1  185.96    8.72
  -7  -9   1  176.19   10.18
  -7   9   1  158.79   12.23
  -7  -9   1  165.07   10.11
  -5  -9   1   55.80    4.22
   5   9  -1   52.35    5.61
  -5   9   1   50.95    6.80
  -5   9   1   58.47    4.72
   5  -9  -1   54.01    4.42
   5   9  -1   51.50    5.69
  -5  -9   1   59.67    5.08
   5  -9  -1   50.44    4.19
  -5   9   1   51.58    4.70
   5   9  -1   53.17    4.48
  -5  -9   1   68.16    5.58
  -5  -9   1   56.93    5.73
  -5  -9   1   52.28    4.95
   3  -9  -1   58.65    5.04
  -3   9   1   65.16    5.32
  -3  -9   1   66.22    4.77
   3  -9  -1   67.53    4.99
  -3  -9   1   61.85    5.70
  -3  -9   1   58.89    4.71
   3   9  -1   66.33    5.69
  -3   9   1   48.65    4.85
  -3   9   1   69.11    7.42
  -3  -9   1   60.83    5.28
   3   9  -1   63.30    5.86
   1  -9  -1   42.23    3.69
   1   9  -1   44.92    4.72
  -1   9   1   40.43    4.64
  -1  -9   1   40.59    3.40
  -1  -9   1   47.60    4.58
  -1   9   1   37.61    4.71
   1   9  -1   44.94    4.54
   1  -9  -1   43.58    3.77
  -1   9   1   43.28    6.16
   1  -9  -1   31.90    4.31
   1  -9  -1   45.83    4.45
  -1  -9   1   51.12    4.35
  -1  -9   1   47.81    3.45
   1   9   1    8.31    3.45
   1   9   1   -1.24    2.18
   1  -9   1    7.47    2.29
  -1  -9  -1    6.82    2.75
   1  -9   1    6.48    2.70
   1   9   1    7.33    3.30
  -1  -9  -1    2.99    3.09
  -1  -9  -1    4.80    2.84
  -1  -9  -1    9.51    2.23
  -1   9  -1   10.67    2.67
  -1  -9  -1    9.36    3.32
  -1   9  -1    7.32    2.56
  -3  -9  -1    9.02    3.56
  -3   9  -1   -0.80    2.20
  -3   9  -1    3.01    2.25
   3   9   1    4.08    2.72
  -3  -9  -1    1.89    2.33
   3  -9   1    3.60    2.06
  -3  -9  -1   -4.12    2.82
  -3  -9  -1    4.78    3.00
   3  -9   1    1.10    1.68
   3   9   1    1.69    3.22
  -3  -9  -1    2.40    2.73
   3   9   1   -3.95    3.06
  -5   9  -1    6.76    4.53
  -5  -9  -1    3.41    3.35
  -5  -9  -1    6.99    3.37
  -5  -9  -1    4.94    3.59
  -5  -9  -1    2.90    3.18
  -5  -9  -1    3.57    2.68
   5   9   1    3.11    3.67
   5   9   1    3.30    3.76
   5   9   1    4.92    3.09
  -7  -9  -1   29.63    5.14
   7   9   1   31.82    5.30
  -7  -9  -1   28.16    4.58
  -7  -9  -1   31.02    4.19
   7   9   1   30.48    5.32
  -7  -9  -1   25.49    4.60
  -7   9  -1   28.31    5.74
  -7  -9  -1   29.68    4.75
  -9  -9  -1    2.51    3.71
  -9  -9  -1    5.41    4.06
  -9  -9  -1    5.12    3.20
  -9  -9  -1    8.78    3.91
   9   9   1    3.38    3.41
   9   9   1    4.09    4.18
   9   9   1   10.83    4.28
  -9  -9  -1    5.42    3.81
  -9   9  -1   -1.68    4.40
  11   9   1   14.33    5.04
 -11  -9  -1   22.52    4.89
 -11  -9  -1    6.44    3.98
 -11   9  -1    8.00    4.73
 -11  -9  -1   11.25    4.33
 -11  -9  -1    8.97    4.74
  11   9   1    8.23    3.77
  11   9   1   17.31    4.68
 -11  -9  -1   11.58    3.93
  11   9   1   16.29    3.14
 -13  -9  -1   71.01    7.38
 -13   9  -1   66.84    7.94
 -13  -9  -1   76.75    7.56
  13   9   1   71.08    5.76
 -13  -9  -1   81.89    8.10
  13   9   1   62.52    7.49
 -13  -9  -1   70.62    7.43
  13   9   1   63.10    7.00
  13   9   1   65.06    7.71
 -13  -9  -1   73.25    6.83
 -15  -9  -1   -2.96    3.69
 -15  -9  -1   -2.50    4.05
  15   9   1   -3.60    3.58
  15   9   1   -0.85    4.62
 -15  -9  -1    3.92    4.35
 -15  -9  -1    1.11    3.55
  15   9   1   -5.99    2.86
  15   9   1    3.08    4.55
 -15   9  -1    5.58    4.85
 -15  -9  -1    3.77    4.93
  17   9   1   51.29    7.78
  17   9   1   56.90    8.01
 -17  -9  -1   59.14    7.88
  17   9   1   58.29    6.13
 -17  -9  -1   68.41    7.94
 -17  -9  -1   74.77    8.13
  17   9   1   63.72    7.64
 -17   9  -1   49.09    7.75
 -17  -9  -1   63.46    6.92
  19   9   1   26.74    5.07
  19   9   1   16.50    5.41
  19  -9   1   22.08    3.25
  19   9   1   20.33    6.32
 -19   9  -1   14.38    6.21
  19   9   1   22.62    6.27
 -19   9  -1   18.15    3.44
 -19   9  -1   17.44    3.43
  19  -9   1   17.95    2.82
 -19  -9  -1   16.11    5.53
 -19  -9  -1   12.27    6.05
 -19  -9  -1   20.07    6.16
  21   9   1   33.11    5.68
  21   9   1   39.04    7.74
 -21   9  -1   36.04    7.38
 -21  -9  -1   49.92    7.96
  21  -9   1   41.76    4.34
  21   9   1   40.19    7.66
 -21   9  -1   33.46    4.62
  21  -9   1   35.11    4.54
  21   9   1   44.24    7.14
 -21  -9  -1   39.74    7.40
 -21   9  -1   38.78    4.63
 -21  -9  -1   40.28    7.09
 -23  -9  -1    2.92    5.99
  23   9   1    7.67    5.17
  23   9   1    8.57    6.55
 -23  -9  -1    0.02    5.62
  23   9   1   10.13    6.30
 -23  -9  -1   10.32    6.39
 -23   9  -1    4.39    3.65
  23  -9   1   12.38    3.51
 -23   9  -1    4.42    3.60
  23  -9   1    8.05    4.04
 -23   9  -1   12.57    6.28
  23   9   1    9.53    4.90
  25   9   1   15.19    7.24
  25   9   1    7.61    5.31
 -25   9  -1   16.78    6.90
 -25  -9  -1   11.54    6.45
 -25   9  -1   24.76    4.78
 -25   9  -1   20.60    4.83
  25  -9   1   17.81    4.76
  25   9   1   17.85    6.24
 -25  -9  -1   17.50    7.23
 -25  -9  -1   22.98    7.07
  25  -9   1   22.99    4.43
  25   9   1   19.35    7.09
 -27   9  -1   11.02    4.62
  27   9   1   11.28    7.22
  27   9   1   -8.46    4.50
 -27  -9  -1   20.31    7.38
  27  -9   1    9.29    4.90
  27   9   1   13.98    5.60
 -27   9  -1   14.58    6.60
 -27   9  -1   13.64    4.59
 -27  -9  -1    6.50    6.60
 -27  -9  -1    0.25    5.92
  27  -9   1    4.61    4.14
 -29  -9  -1   -0.96    6.44
 -29   9  -1    5.92    4.78
  29  -9   1   -5.17    4.54
 -29   9  -1   -4.06    4.29
  29   9   1   -4.82    6.58
 -29   9  -1    4.67    6.71
  29  -9   1    3.77    4.01
  29   9   1   -1.91    4.98
 -29  -9  -1    6.59    6.71
  29   9   1   -4.07    4.66
 -31   9  -1    1.47    4.56
  31   9   1    6.32    5.47
 -31   9  -1   -1.37    5.67
  31  -9   1    6.95    4.35
 -31  -9  -1    7.01    6.52
  31   9   1    1.15    5.81
 -31   9  -1    2.57    4.66
 -33   9  -1    0.05    4.64
  33  -9   1    6.94    4.51
  33   9   1   -4.06    5.40
  33   9   1   -0.88    4.92
 -33   9  -1    4.72    6.22
 -33   9  -1    1.09    4.51
 -33  -9  -1    3.38    6.52
 -35   9  -1   -0.20    4.69
 -35   9  -1    1.80    4.71
  35   9   1    0.33    4.85
 -35  -9  -1   -0.11    6.19
 -35   9  -1   -0.84    5.59
  35   9   1   -6.77    5.29
  35  -9   1    6.06    4.52
 -37   9  -1   17.49    5.90
  37  -9   1    6.98    4.88
  37   9   1    6.63    6.62
 -37   9  -1   12.42    5.69
  37   9   1   14.22    6.21
 -37   9  -1   12.75    6.85
 -37  -9  -1   16.92    8.43
 -39   9  -1   -8.82    4.90
  39  -9   1    3.77    5.06
 -39   9  -1   -0.41    6.29
 -39  -9  -1    6.11    7.10
 -39   9  -1    4.81    5.46
  39   9   1   10.12    7.64
 -41   9  -1    7.56    5.82
 -41  -9  -1    0.97    6.87
  41   9   1    7.67    7.32
  41  -9   1    9.35    6.00
 -41   9  -1   10.46    6.18
 -41   9  -1    5.59    6.98
 -43   9  -1    0.59    6.02
 -43   9  -1    0.04    5.56
 -43  -9  -1   13.01    8.08
 -43   9  -1    1.78    6.52
  43  -9   1   -0.66    4.70
  43   9   1   -5.53    6.04
  44 -10  -1    9.20    5.69
 -44  10   1    4.90    7.60
  44  10  -1    5.10    7.18
 -44  10   1   -6.11    5.40
 -44  10   1   -1.14    5.75
 -44 -10   1   -7.66    6.54
 -42  10   1    5.95    5.76
  42  10  -1    0.81    6.07
 -42  10   1   -2.46    5.52
 -42 -10   1   -2.18    6.98
 -42  10   1    1.36    6.73
  42 -10  -1    4.93    5.47
  40  10  -1    0.38    5.56
 -40 -10   1    0.61    7.37
  40  10  -1   -2.65    6.00
  40 -10  -1    2.11    5.02
 -40  10   1    4.46    6.97
 -40  10   1   -1.20    5.21
 -40  10   1    8.63    5.75
 -38  10   1    9.28    5.61
  38 -10  -1   10.17    4.96
 -38  10   1   14.00    5.55
  38  10  -1   13.92    7.17
 -38 -10   1   16.73    7.76
  38  10  -1    5.95    5.49
 -38  10   1   -6.53    6.42
  36  10  -1   -1.46    5.02
 -36  10   1    9.12    5.35
  36 -10  -1   -4.33    4.02
  36  10  -1   -0.99    5.60
 -36  10   1    5.31    6.77
 -36  10   1   -6.88    4.22
 -36 -10   1    3.38    6.78
  34 -10  -1   11.92    4.62
  34  10  -1   10.12    5.38
 -34  10   1   20.65    5.41
  34  10  -1   16.96    6.98
 -34  10   1   16.53    7.65
 -34  10   1   14.02    5.30
 -34 -10   1   21.78    7.97
 -32 -10   1    2.09    6.53
  32  10  -1   -9.30    3.94
  32  10  -1   -8.19    4.97
  32 -10  -1    7.62    4.08
 -32  10   1   -0.40    4.38
 -32  10   1   -0.79    4.43
 -32  10   1    8.60    6.94
  30  10  -1   -1.17    6.69
  30 -10  -1   -3.13    3.91
  30  10  -1    0.09    4.69
 -30  10   1   -0.90    6.24
 -30  10   1   14.49    4.85
  30 -10  -1    5.80    4.91
  30  10  -1   -4.52    5.38
  30  10  -1   -8.08    6.28
 -30 -10   1   -1.25    6.00
 -30  10   1    2.20    4.53
 -30 -10   1    3.12    6.74
 -28 -10   1   75.87   10.75
  28  10  -1   77.29   10.99
  28  10  -1   86.16   11.19
 -28 -10   1   76.36   10.81
  28 -10  -1   79.00    7.43
 -28  10   1   67.33    7.47
  28 -10  -1   84.88    8.00
  28  10  -1   91.55   10.49
 -28 -10   1   75.75   10.28
 -28  10   1   75.16    7.53
  28  10  -1   78.66    8.55
 -28  10   1   79.59   11.11
  26 -10  -1   84.73    7.81
  26  10  -1   99.88    8.97
 -26  10   1   97.52    8.00
  26  10  -1   90.63   11.49
 -26 -10   1   88.22   10.95
 -26 -10   1   82.18   10.40
 -26  10   1   78.49   11.10
 -26  10   1   91.86    7.89
  26  10  -1   86.22   10.09
  26  10  -1  119.26   12.18
  26 -10  -1   86.53    7.43
 -26 -10   1   96.29   10.77
  24  10  -1   57.25    9.00
  24 -10  -1   28.69    5.15
 -24 -10   1   45.73    7.96
  24 -10  -1   34.11    4.69
  24  10  -1   41.34    6.15
  24  10  -1   30.84    7.68
 -24 -10   1   21.70    7.46
 -24  10   1   38.00    5.16
 -24  10   1   44.21    8.96
  24  10  -1   48.01    7.53
 -24  10   1   39.60    5.20
 -24 -10   1   52.97    8.50
 -22 -10   1  112.46   11.57
 -22 -10   1  134.59   11.75
  22 -10  -1  112.38    7.70
  22  10  -1  107.47   10.48
  22  10  -1  122.50   12.01
 -22 -10   1  115.35   11.11
  22 -10  -1  108.96    7.86
  22  10  -1  119.34    9.19
 -22  10   1  133.14   12.78
 -22  10   1  117.62    8.04
  22  10  -1  116.39   11.82
 -22  10   1  113.67    8.00
 -20 -10   1   26.74    6.76
  20  10  -1   32.61    6.04
 -20 -10   1   33.14    7.21
 -20  10   1   30.28    4.35
  20  10  -1   29.34    7.43
  20  10  -1   35.29    5.10
 -20  10   1   31.81    7.94
  20 -10  -1   34.91    4.39
 -20  10   1   29.92    4.09
  20 -10  -1   22.72    3.62
 -20 -10   1   37.46    6.84
  20  10  -1   28.86    7.04
  18  10  -1  111.52    9.55
 -18  10   1  106.27   11.23
  18 -10  -1  109.50    6.72
  18  10  -1  128.04   11.19
 -18 -10   1   97.23    9.62
 -18 -10   1  100.99    9.64
  18  10  -1  105.20    7.55
 -18 -10   1  116.17   10.35
  18 -10  -1   91.35    6.33
  18  10  -1   88.74    9.91
 -18 -10   1  105.29   10.41
 -18  10   1  108.90    6.86
 -18  10   1  102.02    6.77
  16  10  -1   11.79    5.57
  16 -10  -1   14.29    2.85
 -16 -10   1   25.02    5.50
 -16  10   1   12.15    6.10
 -16  10   1    8.12    2.80
  16  10  -1   10.76    4.35
 -16 -10   1   12.43    4.96
 -16 -10   1   16.98    5.95
  16  10  -1   11.83    3.20
 -16  10   1   12.30    3.02
 -16 -10   1   21.62    5.43
  16  10  -1   21.90    6.17
  14  10  -1    2.86    3.74
 -14 -10   1    1.26    4.34
 -14 -10   1   13.91    4.82
  14  10  -1   13.67    2.76
 -14 -10   1   12.77    4.71
  14  10  -1   13.75    5.45
 -14  10   1    0.50    4.44
  14  10  -1    6.77    5.01
 -14 -10   1    1.27    4.67
 -14  10   1    7.49    2.57
 -14 -10   1   15.18    4.07
 -14  10   1    5.47    2.63
 -12  10   1   18.05    2.95
  12  10  -1   13.14    4.98
 -12 -10   1   11.58    4.97
 -12  10   1   16.89    2.82
 -12  10   1   15.95    5.78
 -12 -10   1   19.13    4.18
 -12 -10   1    7.33    4.03
  12  10  -1   17.96    5.27
 -12 -10   1   20.01    4.78
 -12 -10   1   19.42    4.63
  10  10  -1   32.20    5.47
  10  10  -1   27.09    5.38
  10 -10  -1   30.41    3.07
 -10 -10   1   24.07    5.37
 -10  10   1   28.29    6.14
 -10  10   1   29.88    3.39
 -10 -10   1   26.35    4.32
 -10 -10   1   28.66    5.04
 -10 -10   1   23.24    4.74
 -10 -10   1   28.81    4.85
 -10  10   1   28.76    3.35
   8 -10  -1  313.32   14.71
  -8 -10   1  299.75   16.34
   8  10  -1  328.39   17.75
   8 -10  -1  330.91   14.74
  -8 -10   1  331.80   17.36
   8  10  -1  305.93   15.99
  -8  10   1  305.58   14.84
  -8 -10   1  332.04   16.49
  -8  10   1  317.00   14.97
  -8 -10   1  290.93   17.28
  -8  10   1  305.91   19.15
   8  10  -1  306.79   17.32
  -8 -10   1  332.81   15.62
  -6  10   1  556.87   25.56
  -6 -10   1  566.70   27.31
  -6 -10   1  587.27   25.14
  -6 -10   1  580.83   26.43
   6  10  -1  554.25   27.50
  -6 -10   1  560.12   26.19
  -6  10   1  543.10   25.51
   6 -10  -1  583.25   25.54
  -6  10   1  554.61   29.58
  -6 -10   1  571.12   27.62
   6  10  -1  600.15   26.04
  -6  10   1  601.99   25.74
   6  10  -1  591.28   27.61
   6 -10  -1  588.81   25.53
   4  10  -1   87.42    7.25
  -4  10   1   87.23    6.42
  -4 -10   1   94.23    5.22
   4  10  -1   73.25    6.80
   4  10  -1   89.97    5.32
  -4 -10   1   66.93    6.30
   4 -10  -1   77.27    5.97
  -4 -10   1   87.39    6.02
  -4 -10   1   81.22    5.92
  -4  10   1   75.47    6.06
   4 -10  -1   78.16    5.79
  -4  10   1   80.49    8.51
  -4 -10   1   91.03    7.25
   2 -10  -1   53.18    3.89
  -2 -10   1   48.14    5.42
  -2  10   1   55.69    5.52
   2 -10  -1   57.63    5.10
   2 -10  -1   57.23    3.93
  -2 -10   1   60.30    4.41
   2  10  -1   59.84    5.44
  -2  10   1   46.39    6.88
   2  10  -1   59.30    5.79
  -2 -10   1   58.80    4.23
  -2  10   1   59.43    5.54
  -2 -10   1   64.16    5.42
   2 -10  -1   59.99    5.37
   0 -10   1  137.51    8.32
   0  10   1  157.30    9.44
   0  10   1  142.16    9.18
   0  10  -1  152.41    8.93
   0  10  -1  143.36    8.74
   0 -10   1  141.57    8.65
   0 -10  -1  142.73    9.21
   0 -10  -1  144.23    8.12
   0 -10  -1  136.99    7.99
   0 -10  -1  151.27    9.16
   2  10   1   72.85    5.25
   2  10   1   70.18    6.60
  -2 -10  -1   76.93    5.94
   2  10   1   66.15    6.52
   2 -10   1   79.42    5.21
  -2  10  -1   71.09    5.47
  -2  10  -1   73.03    5.51
  -2 -10  -1   78.80    6.67
  -2 -10  -1   80.90    6.03
  -2 -10  -1   80.48    5.18
   2 -10   1   76.76    5.37
  -2 -10  -1   66.93    6.61
  -4 -10  -1  120.05    9.02
  -4 -10  -1  118.75    8.16
  -4 -10  -1  118.44    8.20
  -4 -10  -1  133.02    7.66
  -4  10  -1  131.08    7.17
  -4  10  -1  115.16    6.85
  -4 -10  -1  131.53    9.02
   4  10   1  121.22    9.29
   4 -10   1  122.18    6.63
   4  10   1  122.45    9.16
   4  10   1  124.22    7.79
   6  10   1  284.49   16.27
  -6 -10  -1  288.03   15.19
   6  10   1  299.03   15.08
  -6 -10  -1  282.11   14.32
  -6 -10  -1  265.72   15.95
   6  10   1  271.86   16.01
  -6 -10  -1  311.59   16.22
  -6  10  -1  270.38   17.80
  -6 -10  -1  278.93   15.30
  -8 -10  -1    3.00    3.75
  -8 -10  -1   12.48    4.20
  -8 -10  -1    8.68    4.07
  -8 -10  -1    4.88    3.26
  -8  10  -1    8.83    5.16
   8  10   1    5.74    4.53
   8  10   1    9.36    4.08
  -8 -10  -1    6.86    4.47
 -10 -10  -1   82.38    8.30
  10  10   1   77.96    8.06
  10  10   1   74.07    8.00
 -10  10  -1   86.74    9.35
 -10 -10  -1   81.75    7.81
 -10 -10  -1   69.15    6.55
 -10 -10  -1   63.13    6.91
 -10 -10  -1   72.83    7.27
 -12 -10  -1   10.88    4.71
 -12 -10  -1   14.41    4.77
 -12  10  -1   20.14    6.16
  12  10   1   22.68    4.97
 -12 -10  -1   24.74    5.30
  12  10   1   15.39    5.39
 -12 -10  -1   22.39    4.57
  12  10   1   19.21    3.27
  12  10   1   16.20    5.48
 -12 -10  -1   20.91    5.36
 -14 -10  -1   66.31    6.97
 -14 -10  -1   84.23    8.18
  14  10   1   64.83    7.42
 -14 -10  -1   93.69    8.46
 -14 -10  -1   74.61    7.85
  14  10   1   81.94    8.92
 -14  10  -1   47.62    7.82
  14  10   1   71.08    8.43
 -14 -10  -1   55.69    8.00
  14  10   1   69.07    5.74
 -16 -10  -1   82.40    9.28
 -16 -10  -1   79.01    8.74
  16  10   1   78.40    9.15
  16  10   1   96.00    7.16
 -16 -10  -1   96.14    9.27
  16  10   1   91.85    9.70
 -16  10  -1   82.35    9.37
 -16 -10  -1   90.96    9.08
 -16 -10  -1   89.38    8.20
  16  10   1   79.54    8.39
 -18 -10  -1  100.17    9.82
  18  10   1   89.62    9.22
  18  10   1   92.74   10.25
 -18  10  -1   94.55   10.45
  18  10   1   88.68    7.51
 -18 -10  -1   94.97    9.99
  18  10   1   98.66   10.48
 -18 -10  -1   79.23    9.21
  20  10   1   11.11    4.41
 -20 -10  -1    9.05    5.89
  20  10   1    4.30    5.32
  20  10   1   22.86    7.22
 -20  10  -1   14.22    3.47
 -20 -10  -1   11.14    5.89
 -20 -10  -1    6.65    6.37
  20  10   1   15.65    6.51
  20 -10   1   12.75    2.70
 -20  10  -1   17.77    6.65
 -20  10  -1   10.21    3.25
 -22 -10  -1   43.19    7.89
  22 -10   1   50.08    4.74
  22  10   1   52.19    6.57
 -22 -10  -1   39.42    7.99
  22  10   1   49.26    8.85
  22 -10   1   45.09    4.92
 -22  10  -1   61.40    9.14
  22  10   1   40.61    7.34
 -22  10  -1   38.74    4.85
 -22  10  -1   50.60    5.13
 -22 -10  -1   53.49    8.50
  22  10   1   45.29    8.39
 -24  10  -1   43.21    5.33
 -24  10  -1   43.19    5.21
  24 -10   1   46.23    5.10
  24  10   1   52.62    6.91
 -24  10  -1   46.43    8.67
  24  10   1   37.72    7.29
  24  10   1   48.07    9.13
  24  10   1   37.72    8.57
 -24 -10  -1   46.62    8.61
 -24 -10  -1   52.28    8.89
 -24 -10  -1   47.96    8.50
  24 -10   1   46.71    5.47
  26  10   1  199.92   15.84
 -26 -10  -1  179.60   14.88
 -26  10  -1  161.69   10.71
 -26 -10  -1  155.00   14.66
  26 -10   1  183.34   10.97
 -26  10  -1  153.31   10.64
  26  10   1  192.30   12.91
  26 -10   1  150.81   10.46
 -26 -10  -1  193.22   15.47
  26  10   1  216.83   16.76
  26  10   1  144.08   13.59
 -26  10  -1  148.06   14.37
 -28  10  -1    1.15    4.41
  28 -10   1   -3.07    3.80
 -28  10  -1   -4.96    6.31
 -28 -10  -1   -4.31    5.93
  28  10   1   -0.01    6.77
 -28  10  -1   -4.39    4.02
  28  10   1    6.08    5.42
 -28 -10  -1   -4.51    6.54
  28  10   1    7.15    6.09
  28  10   1   -1.39    6.38
  28 -10   1    7.41    4.90
 -30  10  -1   16.62    4.93
 -30  10  -1   16.41    4.94
 -30  10  -1   18.10    7.25
  30  10   1   18.84    6.98
  30 -10   1   14.33    4.60
  30  10   1   20.53    6.02
 -30 -10  -1    9.84    7.28
  32 -10   1    8.18    4.38
 -32  10  -1    0.46    4.24
 -32  10  -1    1.78    5.96
 -32 -10  -1    3.48    6.47
  32  10   1    1.03    5.69
  32  10   1    2.88    5.30
 -32  10  -1    3.22    4.41
 -34  10  -1    9.58    4.98
 -34  10  -1   13.12    6.81
  34  10   1    7.69    6.27
  34  10   1    9.05    5.51
 -34 -10  -1    7.03    6.75
  34 -10   1   11.59    4.59
 -34  10  -1   13.75    5.24
 -36  10  -1   20.07    5.67
 -36  10  -1   10.16    5.27
  36  10   1   26.38    6.82
  36 -10   1   29.76    5.79
 -36  10  -1   16.65    7.49
 -36 -10  -1   20.70    8.34
  36  10   1   15.25    7.29
 -38  10  -1   22.65    6.23
  38  10   1   29.50    8.45
 -38 -10  -1   17.79    8.40
 -38  10  -1   15.50    7.55
  38  10   1   38.12    7.68
  38 -10   1   14.14    5.68
 -38  10  -1   32.39    6.61
 -40  10  -1   19.35    5.96
  40 -10   1    8.45    5.44
 -40  10  -1   17.11    7.39
 -40 -10  -1   19.41    8.75
  40  10   1    7.33    7.31
 -40  10  -1   26.80    6.50
 -42  10  -1   11.10    7.58
 -42 -10  -1   22.80    8.68
  42  10   1   23.68    8.54
 -42  10  -1    3.01    5.76
 -42  10  -1   10.65    5.65
  42 -10   1   11.18    5.79
 -43  11   1   26.53    6.82
 -43  11   1    9.03    6.48
  43 -11  -1   20.45    5.97
 -43 -11   1   26.27    9.41
 -43  11   1   20.30    8.48
 -41  11   1    4.22    7.14
  41 -11  -1    4.00    4.79
 -41 -11   1    6.86    7.88
 -41  11   1   -2.20    5.24
 -41  11   1    8.38    5.74
  41  11  -1   -7.33    5.83
  41  11  -1    6.51    6.22
 -39 -11   1   15.18    8.18
  39  11  -1   11.60    6.14
 -39  11   1   12.12    5.93
  39  11  -1    5.73    6.89
 -39  11   1   14.33    5.53
  39 -11  -1   16.02    5.24
 -39  11   1   16.15    8.12
 -37  11   1   11.77    7.22
  37  11  -1    3.46    5.44
 -37 -11   1    8.46    7.84
 -37  11   1    9.75    5.37
 -37  11   1    8.78    4.92
  37 -11  -1   -1.43    4.38
  37  11  -1    9.70    6.93
 -35 -11   1   17.00    7.72
  35 -11  -1    7.54    4.17
  35  11  -1    3.93    5.14
 -35  11   1    5.63    4.89
  35  11  -1    2.76    5.54
 -35  11   1    8.52    4.75
 -35  11   1    5.44    6.52
 -33  11   1   -5.95    5.93
 -33 -11   1    1.86    6.43
  33  11  -1    0.48    4.86
  33  11  -1    2.75    5.57
 -33  11   1    4.28    4.50
  33 -11  -1   -0.18    4.12
 -33  11   1   -0.18    4.17
 -31  11   1    5.03    4.48
  31  11  -1   -0.02    4.88
 -31 -11   1   -4.05    5.65
  31 -11  -1    0.22    3.90
  31  11  -1    6.64    5.09
 -31  11   1    1.74    6.72
 -31  11   1   -3.03    3.97
  29 -11  -1    6.17    4.90
  29  11  -1    8.28    5.23
  29  11  -1   11.18    7.12
 -29  11   1    8.31    6.95
  29  11  -1   10.75    6.00
  29 -11  -1    5.81    3.90
  29  11  -1   17.50    7.64
 -29  11   1   16.83    4.86
 -29  11   1   13.87    4.46
 -29 -11   1    1.46    6.62
  27 -11  -1   14.54    4.14
 -27 -11   1   -2.03    6.05
 -27 -11   1   19.15    7.33
 -27  11   1   16.89    4.72
  27 -11  -1   19.86    5.30
  27  11  -1   17.03    7.73
 -27  11   1   17.59    4.72
 -27  11   1   24.41    8.28
  27  11  -1   28.43    5.82
  27  11  -1   12.08    6.03
  27  11  -1    8.25    7.38
 -25  11   1   -1.82    3.60
 -25  11   1   13.87    7.31
  25  11  -1   -4.49    6.28
  25  11  -1    1.73    5.26
  25  11  -1   -6.52    3.92
 -25 -11   1   -3.87    6.19
 -25 -11   1   -2.98    6.55
 -25  11   1    5.26    3.83
  25 -11  -1    6.67    4.50
  25 -11  -1    3.25    3.43
 -25 -11   1   -0.52    5.52
  25  11  -1   -0.51    6.38
  23  11  -1   -6.88    5.99
 -23  11   1   -2.71    6.28
 -23  11   1    0.42    3.42
  23  11  -1    2.26    4.95
 -23 -11   1    9.62    6.39
  23  11  -1    6.08    6.50
 -23 -11   1    7.10    6.47
 -23  11   1   -3.08    3.49
  23 -11  -1    3.27    3.14
  23  11  -1   -5.53    3.97
  23 -11  -1    3.72    3.96
 -23 -11   1    1.66    5.51
 -21  11   1    0.28    3.24
  21 -11  -1   -1.87    3.35
 -21  11   1   -4.33    3.05
  21  11  -1   -2.09    4.68
 -21 -11   1   10.75    6.19
  21 -11  -1    0.98    2.76
 -21  11   1    8.47    6.81
  21  11  -1   -8.30    5.54
 -21 -11   1   -5.75    4.63
  21  11  -1    0.43    5.79
 -21 -11   1   -1.58    5.75
  21  11  -1    5.14    3.97
  19  11  -1   -0.34    3.39
  19  11  -1   -8.72    5.01
 -19  11   1    4.24    6.07
 -19 -11   1   -5.87    4.21
 -19  11   1   -3.05    2.82
  19 -11  -1   -1.89    2.53
 -19 -11   1    2.65    5.30
  19 -11  -1    2.47    3.10
 -19 -11   1    1.76    5.72
  19  11  -1    2.01    4.31
  19  11  -1    1.87    5.51
 -19  11   1   -1.78    2.83
 -17 -11   1   -0.42    4.46
  17  11  -1   10.19    5.73
 -17 -11   1    1.66    5.43
  17  11  -1    8.70    6.02
 -17  11   1    2.78    2.90
  17  11  -1   -0.10    4.00
 -17  11   1    3.74    5.40
  17  11  -1    7.25    3.27
  17 -11  -1    3.97    2.40
 -17 -11   1    8.75    4.86
 -17 -11   1   -0.47    4.80
 -17  11   1    7.07    2.99
 -15 -11   1    1.62    4.34
  15  11  -1    6.20    5.19
  15  11  -1   -5.50    4.69
 -15  11   1    1.32    2.70
 -15 -11   1   -7.81    3.91
 -15  11   1    0.56    2.54
 -15 -11   1    4.09    4.80
 -15 -11   1    5.47    5.24
  15  11  -1   -1.45    3.82
 -15  11   1    2.18    5.23
 -13  11   1   -8.22    4.90
 -13 -11   1   -0.55    4.07
 -13 -11   1    2.50    3.91
 -13 -11   1    0.92    3.61
 -13 -11   1    0.58    4.18
 -13  11   1    1.15    2.62
 -13  11   1   -0.85    2.52
  13  11  -1   -5.73    4.42
  13  11  -1    0.99    4.71
 -13 -11   1    4.53    4.81
 -11 -11   1    5.90    3.95
 -11 -11   1    0.63    3.37
 -11 -11   1    0.39    3.90
 -11 -11   1   -0.85    4.50
 -11  11   1    1.99    2.63
  11  11  -1    1.66    4.61
 -11  11   1    1.17    2.64
 -11  11   1    1.83    5.24
  11  11  -1    4.15    4.40
 -11 -11   1   -4.67    3.52
  -9 -11   1   -4.14    3.02
  -9  11   1   -0.01    2.52
  -9 -11   1   -1.94    3.32
   9  11  -1   -3.28    3.16
   9 -11  -1   -0.94    2.12
  -9  11   1    2.73    4.60
  -9 -11   1    0.76    3.76
  -9 -11   1    4.84    3.83
   9 -11  -1    1.35    2.45
   9  11  -1    6.43    4.48
   9  11  -1    2.08    4.31
  -9  11   1   -0.70    2.81
  -9 -11   1    4.23    4.14
  -7  11   1   -1.11    4.22
  -7 -11   1    3.32    3.44
  -7 -11   1    6.58    3.11
   7 -11  -1    5.94    2.95
  -7 -11   1    6.54    3.98
   7 -11  -1    4.39    2.42
  -7  11   1    9.48    2.99
  -7  11   1    2.86    2.77
   7  11  -1   11.99    4.52
   7  11  -1   -2.62    3.67
  -7 -11   1    7.19    3.71
   7  11  -1    2.87    3.08
  -5 -11   1   56.97    5.86
  -5  11   1   57.16    5.28
   5  11  -1   56.72    4.54
  -5  11   1   64.97    8.20
   5 -11  -1   53.23    5.03
   5  11  -1   45.63    6.09
  -5 -11   1   62.37    4.78
  -5  11   1   61.02    5.65
  -5 -11   1   53.08    6.25
   5  11  -1   53.25    6.12
   5 -11  -1   68.07    5.17
  -3  11   1    2.61    5.12
   3  11  -1   -3.94    3.33
   3 -11  -1    0.86    2.94
  -3  11   1   -1.16    3.02
  -3 -11   1    0.48    3.43
  -3  11   1   -6.87    3.10
   3  11  -1   -0.12    3.53
   3 -11  -1    4.81    2.96
  -3 -11   1   -1.83    2.75
  -1 -11   1    9.42    3.09
  -1 -11   1   11.18    3.74
  -1  11   1    4.46    3.35
   1 -11  -1   14.41    3.56
  -1  11   1    8.19    3.60
   1  11  -1    8.74    3.52
  -1  11   1   12.11    5.58
   1 -11  -1    8.71    3.70
   1  11  -1   11.42    3.72
  -1  11  -1   27.32    3.97
   1 -11   1   23.86    3.94
   1  11   1   28.22    4.64
  -1 -11  -1   30.37    3.29
  -1  11  -1   24.12    3.92
  -1 -11  -1   25.94    4.80
  -1 -11  -1   23.74    4.33
   1 -11   1   23.89    3.42
   1  11   1   22.03    4.68
   3  11   1    7.56    4.24
  -3 -11  -1    0.35    3.68
  -3  11  -1    5.28    2.87
  -3 -11  -1    2.85    3.45
   3  11   1    7.51    4.10
  -3 -11  -1    5.36    2.83
  -3 -11  -1   10.68    3.52
   3 -11   1    5.25    2.76
  -3  11  -1    8.97    2.94
   3  11   1    8.84    3.00
   3 -11   1    4.19    2.38
  -5 -11  -1   -4.66    2.73
  -5 -11  -1    0.20    3.32
  -5 -11  -1    1.51    3.81
   5  11   1    1.26    3.00
   5  11   1   -2.87    3.99
  -5 -11  -1   11.51    3.89
   5 -11   1    0.22    2.10
   5  11   1   -1.56    3.93
  -5  11  -1    1.16    2.45
  -5  11  -1    2.38    2.29
  -5 -11  -1    8.29    3.81
  -7 -11  -1    7.38    3.58
  -7 -11  -1    4.88    3.92
   7  11   1   12.80    4.90
  -7  11  -1   15.75    5.74
   7  11   1    8.23    4.53
  -7 -11  -1   15.24    4.49
  -7 -11  -1   11.25    4.05
   7  11   1   11.93    3.82
  -7 -11  -1    7.36    4.46
  -9  11  -1    5.97    5.22
  -9 -11  -1    5.47    4.73
   9  11   1   13.91    4.72
  -9 -11  -1    2.20    4.00
   9  11   1    5.81    4.77
  -9 -11  -1    2.87    3.47
  -9 -11  -1    2.42    4.04
  -9 -11  -1   -1.43    3.74
 -11 -11  -1    4.75    4.78
 -11  11  -1   -4.04    4.95
 -11 -11  -1    1.03    4.06
 -11 -11  -1    4.00    3.75
  11  11   1    2.37    4.13
  11  11   1    9.64    5.30
 -11 -11  -1    7.86    4.39
 -11 -11  -1   -0.86    4.11
 -13 -11  -1    7.48    4.53
  13  11   1   10.65    5.31
  13  11   1    9.54    4.71
 -13 -11  -1    0.44    4.60
 -13 -11  -1    4.66    4.18
 -13  11  -1    5.56    5.76
  13  11   1    6.05    5.04
 -13 -11  -1    3.29    4.55
 -13 -11  -1    4.45    4.44
  15  11   1    5.07    3.15
  15  11   1    6.01    5.49
 -15 -11  -1    0.52    4.83
 -15 -11  -1   11.12    5.08
 -15 -11  -1    6.57    5.54
  15  11   1    3.81    4.92
 -15 -11  -1   11.39    5.19
  15  11   1    9.35    4.90
 -15 -11  -1    3.01    4.41
 -15  11  -1    3.25    5.82
  17  11   1    3.35    4.50
 -17  11  -1    2.01    6.06
  17  11   1   -3.55    5.50
  17  11   1   -0.06    5.70
 -17 -11  -1    2.85    5.12
 -17 -11  -1    6.24    4.59
 -17 -11  -1    8.51    6.02
  17  11   1    3.92    3.80
 -17 -11  -1    4.35    5.25
  19  11   1    7.76    4.24
  19  11   1    7.32    5.08
  19  11   1    8.82    6.24
 -19 -11  -1   10.05    6.08
 -19 -11  -1   10.18    6.10
 -19 -11  -1   11.18    5.83
  19  11   1    7.63    6.23
 -19  11  -1   10.45    6.62
  21  11   1    1.77    4.10
  21  11   1    6.99    6.53
  21  11   1    6.10    6.42
 -21  11  -1    9.27    6.78
 -21  11  -1   -1.49    3.00
 -21 -11  -1   -2.90    5.51
  21  11   1    1.98    4.82
 -21 -11  -1   10.77    5.74
 -21 -11  -1    3.30    6.06
 -21  11  -1    4.47    2.94
  23  11   1    4.98    6.53
 -23 -11  -1   -4.63    5.73
 -23 -11  -1    9.94    6.09
 -23  11  -1    4.35    6.39
 -23 -11  -1    5.32    6.80
  23  11   1    9.82    5.84
  23  11   1   -9.14    3.81
  23 -11   1    1.23    3.03
 -23  11  -1    1.24    3.33
 -23  11  -1   -3.99    3.23
  23  11   1   14.47    7.22
  23 -11   1    5.50    3.36
  25 -11   1    5.40    3.35
  25 -11   1    7.70    4.11
  25  11   1   11.94    6.32
 -25  11  -1    1.00    3.75
 -25  11  -1    2.41    3.65
 -25  11  -1    6.64    6.83
  25  11   1    5.95    7.17
 -25 -11  -1    0.54    6.43
 -25 -11  -1    7.78    6.51
 -25 -11  -1    6.59    6.86
  25  11   1   -6.67    6.54
  25  11   1    2.84    4.81
 -27  11  -1    7.93    4.07
 -27  11  -1    7.06    4.08
  27  11   1    9.07    5.27
 -27  11  -1    7.21    6.82
 -27 -11  -1   -3.83    6.16
  27 -11   1    3.44    3.66
  27  11   1    4.54    7.21
  27  11   1   -2.60    5.17
  27 -11   1    9.58    4.51
  27  11   1    5.07    7.26
 -27 -11  -1    7.88    6.53
  29 -11   1   -2.81    4.20
  29  11   1   10.13    5.29
 -29  11  -1   -0.13    3.74
 -29 -11  -1    1.75    6.55
  29 -11   1   -3.36    3.40
 -29  11  -1   -2.26    5.70
  29  11   1    4.52    5.68
 -29  11  -1    2.99    3.89
  31  11   1    5.17    5.03
  31 -11   1    0.81    3.70
  31  11   1   -5.52    4.72
 -31  11  -1    5.24    4.20
 -31  11  -1   -2.65    5.34
 -31  11  -1    6.79    4.20
 -31 -11  -1    8.75    7.45
  33  11   1   -0.24    5.55
  33 -11   1   -2.89    3.71
 -33 -11  -1    7.05    7.47
  33  11   1    3.72    5.22
 -33  11  -1   -0.98    4.16
 -33  11  -1   -3.59    4.09
 -33  11  -1   -3.61    5.68
  35  11   1   -4.11    5.03
  35  11   1   -5.35    5.79
 -35 -11  -1   -0.97    6.62
 -35  11  -1    3.54    4.91
 -35  11  -1   -3.60    4.50
  35 -11   1    2.36    4.19
 -35  11  -1   14.16    7.45
  37  11   1    1.07    6.14
  37 -11   1   -4.28    4.03
  37  11   1   -6.83    4.98
 -37  11  -1    6.83    5.02
 -37 -11  -1    8.26    7.90
 -37  11  -1    4.93    7.12
 -37  11  -1   -1.78    4.65
 -39 -11  -1    9.61    7.88
 -39  11  -1    1.12    4.92
 -39  11  -1    4.48    5.23
  39  11   1    7.35    6.43
  39  11   1   -0.07    6.76
  39 -11   1    1.52    4.91
 -39  11  -1   -4.76    5.79
 -41  11  -1   -9.53    4.66
  41 -11   1    7.67    5.17
 -41  11  -1   -1.53    5.46
  41  11   1    7.70    7.48
 -41  11  -1    4.65    6.59
 -41 -11  -1   -0.47    7.73
 -42  12   1    1.33    5.27
 -42 -12   1   -5.43    6.82
 -42  12   1    9.50    5.74
 -42  12   1   -1.65    6.66
  42 -12  -1   -0.70    4.98
  42  12  -1    3.30    6.22
  40  12  -1   -0.25    5.62
 -40  12   1    0.18    5.35
 -40  12   1   10.63    7.89
 -40  12   1    6.33    5.42
  40 -12  -1    0.45    4.82
 -40 -12   1    3.27    7.47
  38 -12  -1   -0.18    4.19
  38  12  -1   -0.06    5.43
 -38  12   1    2.69    5.04
 -38  12   1    0.77    7.51
 -38 -12   1    1.52    7.33
 -38  12   1   -2.75    4.78
 -36 -12   1   -7.36    6.38
  36  12  -1    6.13    5.48
 -36  12   1   -0.19    4.77
 -36  12   1    3.72    4.65
 -36  12   1    5.99    6.97
  36 -12  -1   -1.26    3.92
  36  12  -1   -0.78    6.00
 -34  12   1   -1.10    4.53
  34  12  -1   -1.38    5.56
  34 -12  -1    1.54    4.18
 -34 -12   1   13.62    7.56
  34  12  -1   -4.25    4.94
 -34  12   1    4.49    7.25
 -34  12   1    2.08    4.36
  32 -12  -1    0.29    3.63
 -32  12   1   -2.04    4.09
  32  12  -1    1.71    5.36
 -32  12   1   -4.70    3.75
 -32  12   1    1.49    6.57
  32  12  -1   -1.24    4.67
 -32 -12   1   -2.92    6.68
  30  12  -1   14.59    4.99
 -30  12   1   15.73    4.53
 -30  12   1    8.91    7.26
 -30  12   1    7.63    4.01
  30 -12  -1    5.95    3.83
 -30 -12   1    5.19    6.67
  30  12  -1    6.97    6.03
  28 -12  -1    3.48    4.09
  28  12  -1    1.77    4.40
 -28 -12   1    6.38    6.57
  28  12  -1    7.36    7.04
  28 -12  -1    4.22    3.74
 -28  12   1   -1.17    3.97
  28  12  -1   19.63    7.54
 -28  12   1    0.33    3.72
 -28  12   1   11.25    6.94
  28  12  -1    4.09    5.31
  26 -12  -1   14.89    4.59
  26  12  -1   21.59    7.59
  26  12  -1    6.65    6.67
  26  12  -1    9.13    4.91
 -26  12   1   28.32    8.29
 -26  12   1   17.50    4.32
 -26  12   1   20.51    4.32
  26  12  -1    6.03    5.83
 -26 -12   1   12.24    7.29
  26 -12  -1   18.95    4.00
 -26 -12   1    2.51    6.37
  24  12  -1   -4.28    4.00
  24 -12  -1    7.12    3.47
  24 -12  -1    7.99    4.05
 -24  12   1   -3.10    6.52
  24  12  -1    5.81    6.94
 -24  12   1   -0.68    3.67
  24  12  -1    5.55    7.05
 -24  12   1    6.99    3.72
  24  12  -1    2.57    5.35
 -24 -12   1    9.16    6.65
 -24 -12   1    6.63    7.11
 -24 -12   1    9.36    6.33
 -22 -12   1    7.49    6.56
 -22  12   1    2.75    6.52
  22 -12  -1   -1.15    3.39
  22  12  -1    7.72    6.87
  22  12  -1   -0.28    4.99
  22  12  -1    3.49    7.10
 -22  12   1   -7.14    3.28
  22 -12  -1    2.12    3.00
 -22  12   1    3.07    3.32
 -22 -12   1   -6.79    5.25
 -22 -12   1    3.58    5.81
  22  12  -1    5.61    4.12
 -20 -12   1  -13.21    5.17
  20  12  -1    1.03    6.31
  20 -12  -1    0.25    3.08
 -20 -12   1   -2.86    5.04
 -20  12   1    4.49    6.36
 -20 -12   1    1.13    5.41
  20 -12  -1    2.53    2.68
  20  12  -1   -7.49    5.42
  20  12  -1   -0.49    4.50
  20  12  -1   -0.14    3.46
 -20  12   1    5.18    3.23
 -20  12   1    5.50    3.41
  18 -12  -1    6.81    2.46
 -18 -12   1    5.82    5.10
 -18  12   1    9.17    3.11
  18  12  -1    2.23    4.69
 -18 -12   1    6.96    5.39
 -18 -12   1    2.24    5.47
 -18 -12   1   -3.41    5.67
  18  12  -1    4.61    6.00
  18  12  -1    0.62    6.05
 -18  12   1    3.00    2.99
 -18  12   1    8.27    6.40
  16  12  -1   -3.41    3.99
 -16  12   1    3.42    2.89
 -16 -12   1   -2.45    4.67
 -16 -12   1    2.54    5.21
 -16  12   1    5.58    2.89
 -16 -12   1    7.21    5.98
 -16  12   1   -0.19    6.09
  16  12  -1    6.77    5.97
  16  12  -1    2.43    5.41
 -14 -12   1    3.99    4.19
 -14 -12   1   20.39    5.90
 -14  12   1   10.45    6.54
  14  12  -1   16.27    6.08
  14  12  -1    3.90    5.32
 -14  12   1    8.28    3.13
 -14 -12   1   13.52    6.22
 -14  12   1    8.51    3.18
 -14 -12   1    7.35    4.90
 -12 -12   1   19.94    6.18
 -12 -12   1   16.66    5.21
  12  12  -1   28.86    6.67
  12  12  -1   17.82    6.05
 -12  12   1   27.31    3.70
 -12 -12   1   14.38    4.50
 -12 -12   1   13.67    5.11
 -12  12   1   20.75    3.67
 -12  12   1   18.67    6.58
  12 -12  -1   23.87    3.02
  12  12  -1    9.57    4.35
  10  12  -1    7.79    4.92
 -10 -12   1   -1.12    4.20
 -10  12   1   -0.53    2.90
  10 -12  -1    1.25    2.40
 -10 -12   1   -1.35    3.31
  10 -12  -1    3.21    2.60
  10  12  -1    7.11    3.73
 -10  12   1    0.39    2.98
 -10  12   1   -3.89    4.94
  10  12  -1   -1.79    4.71
 -10 -12   1   -0.88    4.41
  -8 -12   1   -6.14    4.05
  -8 -12   1    1.59    3.21
   8 -12  -1    4.83    3.03
  -8 -12   1    2.89    3.75
   8 -12  -1    2.35    2.63
  -8  12   1    0.73    3.11
  -8  12   1   -1.96    5.30
   8  12  -1    1.44    4.48
   8  12  -1   -1.68    3.18
   8  12  -1    3.38    4.55
  -8  12   1    0.29    3.11
  -6 -12   1   42.38    4.77
  -6  12   1   48.38    5.23
  -6  12   1   44.29    7.93
  -6 -12   1   46.56    6.43
   6 -12  -1   45.11    4.68
   6  12  -1   40.65    6.36
  -6  12   1   35.66    4.78
   6  12  -1   49.20    4.45
   6 -12  -1   41.99    4.73
  -6  12   1   52.61    5.44
   6  12  -1   46.77    6.24
  -6 -12   1   52.45    5.99
  -4 -12   1    3.41    3.54
   4 -12  -1    1.70    2.93
  -4  12   1    7.42    6.05
  -4 -12   1    5.20    4.08
   4  12  -1    1.62    4.17
   4 -12  -1    2.74    3.36
  -4  12   1    3.91    3.73
   4  12  -1    6.26    4.38
  -4 -12   1    4.54    2.66
  -4  12   1   12.20    3.89
   2  12  -1    2.41    3.84
   2 -12  -1    8.61    3.40
  -2 -12   1    2.96    3.80
  -2  12   1    1.84    3.49
  -2 -12   1   -1.69    3.18
   2  12  -1    0.37    3.64
   2 -12  -1    4.57    3.50
  -2  12   1    4.70    5.69
  -2  12   1    7.13    3.84
   0  12   1  107.83    8.51
   0 -12   1  113.18    7.51
   0  12   1  110.11    8.46
   0 -12  -1  107.04    8.36
   0  12  -1  104.02    7.99
   0  12  -1  103.95    7.72
   0 -12  -1   97.84    7.97
   0 -12   1   97.17    7.70
   2  12   1    2.18    4.05
  -2  12  -1    4.50    3.49
   2 -12   1    1.94    3.14
   2  12   1    2.59    4.21
   2 -12   1    4.16    2.86
  -2 -12  -1    9.08    3.12
  -2  12  -1    2.29    3.38
  -2 -12  -1    6.64    4.30
  -2 -12  -1    3.14    3.63
   4 -12   1    3.82    2.46
   4  12   1    1.06    4.02
  -4 -12  -1    5.99    3.80
   4  12   1    2.76    4.11
   4  12   1    1.54    3.06
  -4 -12  -1    2.50    3.24
  -4 -12  -1   -6.19    3.83
  -4  12  -1   -1.10    2.87
   4 -12   1   -5.65    2.61
  -4  12  -1    1.58    2.96
   6 -12   1    8.95    2.64
  -6 -12  -1    9.05    4.34
  -6 -12  -1    8.11    4.82
  -6  12  -1    8.54    2.90
   6  12   1    2.73    4.57
  -6 -12  -1   10.12    3.86
   6  12   1   14.74    5.31
   6  12   1    6.70    3.60
  -6  12  -1   12.05    3.06
   8  12   1   -5.78    3.55
   8  12   1    5.69    5.18
   8  12   1   -4.10    4.61
  -8  12  -1   -0.29    5.67
  -8 -12  -1   -0.96    3.62
  -8 -12  -1   -0.53    4.57
  -8 -12  -1    1.95    4.08
 -10 -12  -1   15.80    4.49
 -10 -12  -1   12.76    5.11
  10  12   1   13.11    5.85
 -10  12  -1   19.86    6.46
 -10 -12  -1   11.13    4.86
  10  12   1   23.29    6.32
 -10 -12  -1    7.86    5.24
 -12  12  -1   19.74    6.88
 -12 -12  -1   26.52    6.61
 -12 -12  -1   30.90    6.35
  12  12   1   13.41    6.15
 -12 -12  -1   29.67    6.13
 -12 -12  -1   36.81    5.90
  12  12   1   24.05    6.39
 -12 -12  -1   35.52    6.32
 -14 -12  -1   18.89    5.84
 -14 -12  -1   26.37    5.66
 -14  12  -1   18.24    7.27
  14  12   1   26.25    6.92
  14  12   1   29.57    5.86
 -14 -12  -1   21.35    5.90
  14  12   1   15.20    6.56
 -14 -12  -1   18.45    5.77
 -14 -12  -1   25.69    6.72
  16  12   1    7.39    3.10
  16  12   1    4.73    4.95
  16  12   1    2.78    5.84
 -16 -12  -1    0.93    5.03
 -16 -12  -1    7.22    6.07
 -16 -12  -1   10.62    5.73
  16  12   1    5.78    6.10
 -16 -12  -1   15.37    5.33
 -16 -12  -1   -1.23    5.01
 -16  12  -1    4.27    6.41
  18  12   1   28.94    4.61
 -18 -12  -1   32.99    7.02
 -18  12  -1   35.80    8.60
 -18 -12  -1   29.47    6.36
 -18 -12  -1   34.19    7.08
  18  12   1   51.06    8.74
 -18 -12  -1   32.07    7.58
  18  12   1   40.57    8.19
  18  12   1   28.73    6.53
 -20 -12  -1   11.62    6.21
 -20 -12  -1   12.32    6.94
  20  12   1    6.55    6.83
 -20 -12  -1   12.07    6.58
  20  12   1    3.64    6.53
  20  12   1    8.25    4.48
  20  12   1    0.02    5.19
 -20  12  -1   19.03    7.55
 -22 -12  -1    8.04    6.58
  22  12   1    9.75    5.47
  22  12   1    5.04    6.96
  22  12   1    4.02    4.52
 -22 -12  -1   -3.27    5.59
 -22  12  -1    0.69    6.51
 -22 -12  -1   -4.71    5.89
  22  12   1   -2.22    6.33
 -24  12  -1    7.04    3.54
 -24  12  -1    1.09    3.34
  24 -12   1    5.31    3.74
 -24  12  -1   15.02    7.74
  24  12   1    4.14    4.87
 -24 -12  -1   -5.55    6.39
  24 -12   1    5.28    3.06
 -24 -12  -1    2.14    6.49
  24  12   1   -4.20    6.04
  24  12   1    2.24    6.94
  24  12   1    3.44    5.51
 -26  12  -1   -3.72    3.21
  26  12   1   -1.60    7.03
  26  12   1    6.10    7.15
  26  12   1   -4.43    4.84
 -26 -12  -1   -2.00    5.97
 -26  12  -1   -4.41    6.07
  26 -12   1    2.94    3.18
 -26  12  -1    6.53    3.60
  26  12   1    2.33    4.62
  26 -12   1    0.62    3.38
  28 -12   1   12.87    3.86
 -28  12  -1    8.16    3.90
  28 -12   1   15.76    4.42
 -28  12  -1   13.65    4.16
 -28  12  -1   34.33    8.71
 -28 -12  -1    8.13    7.20
  28  12   1    7.83    5.90
  28  12   1   12.31    5.11
 -30 -12  -1    1.58    6.46
  30 -12   1    3.25    3.46
  30  12   1    1.75    5.74
 -30  12  -1   -1.22    3.81
  30  12   1    5.20    4.99
 -30  12  -1    2.80    3.89
 -30  12  -1   -2.41    6.26
  32  12   1   -1.41    5.60
  32  12   1    8.61    5.37
 -32  12  -1    1.26    6.39
 -32  12  -1    3.52    4.20
 -32 -12  -1    2.46    7.05
 -32  12  -1    1.48    4.03
  32 -12   1   -4.24    3.67
 -34  12  -1   23.98    8.19
 -34  12  -1    5.36    4.66
  34  12   1    2.89    5.43
 -34  12  -1    0.47    4.67
  34 -12   1   11.83    4.27
  34  12   1   -0.90    6.07
 -34 -12  -1   15.35    7.94
 -36 -12  -1   -3.50    6.70
 -36  12  -1    8.95    4.95
  36  12   1    6.14    5.84
  36  12   1   -8.63    5.42
  36 -12   1   -3.37    4.08
 -36  12  -1   17.67    8.38
 -36  12  -1    6.05    4.63
 -38  12  -1   -9.64    4.57
 -38 -12  -1    8.42    7.93
 -38  12  -1    6.66    7.24
  38 -12   1   -1.24    4.27
 -38  12  -1    1.70    5.03
  38  12   1   -0.84    5.74
 -40  12  -1    6.64    5.66
 -40 -12  -1  -12.05    6.34
  40 -12   1   -2.47    4.52
  40  12   1   -2.16    5.70
 -40  12  -1    8.86    7.78
 -40  12  -1    4.12    5.12
 -39 -13   1    4.26    7.60
 -39  13   1   -4.42    7.41
 -39  13   1    2.96    4.98
  39 -13  -1    6.41    4.99
  39  13  -1   -1.31    5.33
 -39  13   1   10.44    5.27
 -37  13   1   -1.54    4.45
 -37  13   1   -3.83    6.98
  37  13  -1    2.91    5.06
 -37  13   1    2.27    4.54
 -37 -13   1   -3.93    6.88
  37 -13  -1   -5.33    3.95
 -35 -13   1    7.08    7.42
  35  13  -1    1.41    5.10
  35 -13  -1    2.67    4.20
 -35  13   1    5.68    4.55
 -35  13   1    6.31    4.71
 -35  13   1   10.81    7.75
 -33  13   1    1.27    6.69
 -33  13   1   -0.74    4.16
 -33  13   1    6.90    4.50
  33  13  -1    4.90    5.09
 -33 -13   1   -5.18    6.57
  33 -13  -1    0.01    3.98
 -31 -13   1   -1.21    6.20
  31  13  -1    7.45    5.03
  31 -13  -1    2.39    3.56
 -31  13   1    8.68    4.33
 -31  13   1   11.31    7.31
 -31  13   1    6.24    4.27
  29 -13  -1    4.66    3.65
 -29 -13   1   12.32    7.27
 -29  13   1    2.54    6.86
 -29  13   1    9.47    4.07
 -29  13   1    7.12    3.78
  29  13  -1   10.49    4.79
  27 -13  -1   -1.34    3.09
 -27  13   1    2.76    6.65
  27  13  -1  -11.91    4.35
 -27 -13   1    7.77    6.79
  27  13  -1    3.87    6.39
 -27  13   1   -2.15    3.37
 -27  13   1   -0.18    3.55
  27  13  -1  -10.85    5.75
  27 -13  -1    2.39    3.89
  27  13  -1   -0.96    4.04
 -25  13   1    4.50    3.58
 -25  13   1   -7.17    6.00
  25  13  -1   14.42    7.78
  25  13  -1    0.60    4.84
 -25 -13   1   12.17    7.23
  25 -13  -1   -4.11    2.93
  25  13  -1    2.96    4.08
 -25  13   1    2.61    3.27
  25  13  -1   -0.77    6.14
  25 -13  -1    1.81    3.44
 -23  13   1   26.46    8.74
 -23  13   1   22.59    4.09
 -23  13   1   27.63    4.20
 -23 -13   1   21.85    7.05
  23 -13  -1   27.07    4.06
  23  13  -1   29.44    8.15
  23  13  -1   39.54    7.28
 -23 -13   1   30.19    8.07
  23 -13  -1   19.94    3.74
  23 -13  -1   29.57    4.63
  23  13  -1   24.70    4.46
  23  13  -1   19.55    8.06
  21 -13  -1   27.80    3.70
 -21  13   1   14.57    8.05
 -21 -13   1   23.04    7.69
  21  13  -1   31.37    7.38
 -21 -13   1   21.04    6.78
  21  13  -1   19.54    3.79
  21  13  -1   22.77    7.76
 -21  13   1   31.70    4.18
  21  13  -1   16.23    7.44
 -21  13   1   16.75    3.61
  21 -13  -1   21.51    3.65
  19  13  -1   -4.25    5.88
  19  13  -1   11.47    5.40
  19  13  -1    9.02    6.76
 -19  13   1   -1.17    2.94
 -19 -13   1   -0.81    5.90
  19 -13  -1    0.63    2.79
 -19  13   1   -1.63    6.40
 -19  13   1    1.05    2.98
  17  13  -1    3.06    5.98
 -17  13   1    4.11    7.00
  17  13  -1   -4.32    5.52
 -17 -13   1   -0.43    5.83
 -17  13   1    5.16    3.20
  17 -13  -1    6.71    2.59
 -17 -13   1   -3.36    5.25
 -15 -13   1   28.13    5.90
  15  13  -1   39.98    7.70
 -15  13   1   44.03    4.37
  15  13  -1   42.18    7.58
 -15  13   1   49.08    9.11
 -15  13   1   27.78    4.06
 -15 -13   1   34.84    7.44
 -15 -13   1   30.70    6.77
  13  13  -1   46.15    6.08
 -13  13   1   25.42    7.18
  13  13  -1   33.60    6.92
 -13  13   1   34.89    4.20
  13  13  -1   29.62    7.11
 -13 -13   1   27.72    6.90
 -13 -13   1   31.60    5.73
 -13  13   1   33.16    4.04
 -13 -13   1   23.73    6.10
  13 -13  -1   28.36    3.57
  13 -13  -1   32.49    3.57
  11 -13  -1    0.70    2.69
  11  13  -1   -2.10    3.59
 -11  13   1    1.25    5.71
  11 -13  -1   -1.48    2.58
 -11 -13   1    6.40    4.21
  11  13  -1    2.62    5.15
 -11 -13   1   -3.93    4.18
 -11  13   1   -6.38    2.85
 -11  13   1   -1.57    3.00
  11  13  -1    1.38    5.25
 -11 -13   1   -1.56    5.03
  -9  13   1   20.90    7.35
  -9  13   1   15.03    3.79
   9 -13  -1   11.72    3.25
   9  13  -1   16.44    5.74
   9 -13  -1    8.16    3.49
  -9 -13   1   14.21    5.81
  -9  13   1   10.07    3.74
   9  13  -1    9.70    5.20
  -9 -13   1   11.97    4.95
   9  13  -1   15.60    4.13
  -9 -13   1   14.46    4.34
   7  13  -1    1.48    4.56
   7  13  -1   -0.12    2.58
   7  13  -1    4.42    4.68
  -7 -13   1   -0.18    4.64
  -7  13   1    3.13    3.36
   7 -13  -1    3.30    3.38
   7 -13  -1    0.31    3.00
  -7  13   1    3.43    3.58
  -7 -13   1   -1.40    3.41
  -7 -13   1   -1.60    3.74
  -7  13   1   -1.37    5.57
  -5  13   1    0.80    3.87
  -5 -13   1    4.42    4.55
   5  13  -1    2.48    4.34
   5 -13  -1   -0.43    3.36
  -5 -13   1   -1.71    3.66
   5  13  -1   -0.69    4.43
  -5  13   1    6.64    6.24
  -5  13   1    0.71    3.61
   5 -13  -1    1.14    3.12
  -5  13   1    1.13    3.52
  -5 -13   1    0.77    3.02
   3  13  -1   18.42    5.19
  -3 -13   1   24.66    4.65
   3 -13  -1   24.17    4.71
  -3  13   1   22.58    4.81
   3  13  -1   26.70    5.37
   3 -13  -1   16.86    4.16
  -3 -13   1   23.44    5.31
  -3  13   1   30.14    5.19
   1 -13  -1    9.99    4.30
  -1  13   1   16.50    4.69
  -1 -13   1   11.50    3.79
   1  13  -1    8.68    4.26
  -1  13   1   14.70    4.57
  -1 -13   1   12.27    4.53
   1 -13  -1   11.61    4.07
   1  13  -1   11.96    4.33
   1  13   1   75.24    7.72
   1 -13   1   84.87    6.65
   1 -13   1   79.25    6.92
  -1 -13  -1   85.98    5.97
  -1 -13  -1   88.93    7.55
  -1 -13  -1   82.32    7.76
  -1  13  -1   85.33    7.09
  -1  13  -1   72.89    6.84
   1  13   1   78.64    7.83
   3  13   1    0.05    4.66
  -3 -13  -1    1.20    3.27
   3  13   1    4.57    4.74
  -3 -13  -1    4.22    4.06
   3 -13   1    1.60    2.87
   3 -13   1    1.23    3.20
  -3 -13  -1   -2.47    4.22
  -3  13  -1    3.41    3.59
  -3  13  -1   -1.32    3.39
   5  13   1    8.62    4.77
  -5  13  -1    7.25    3.51
  -5 -13  -1    8.85    4.94
   5 -13   1    9.09    3.36
   5  13   1    9.45    3.47
  -5 -13  -1    7.19    4.49
   5 -13   1    8.57    2.84
  -5  13  -1   12.42    3.27
   5  13   1    2.01    4.65
  -5 -13  -1    5.31    3.73
  -7  13  -1   14.34    3.43
  -7 -13  -1   11.25    4.38
   7  13   1   17.66    4.28
   7  13   1    3.96    5.18
   7  13   1   24.75    6.23
  -7 -13  -1   16.58    5.10
  -7 -13  -1   21.46    5.98
  -7  13  -1   13.11    3.41
   9  13   1   11.88    4.40
  -9  13  -1   17.93    7.54
   9  13   1   12.16    5.77
  -9 -13  -1   17.61    4.68
   9  13   1    1.53    5.33
  -9 -13  -1    7.43    5.16
  -9 -13  -1    1.91    4.61
  11  13   1    8.38    5.64
 -11 -13  -1    2.00    5.24
 -11 -13  -1   11.59    5.26
  11  13   1    7.80    4.53
 -11  13  -1   10.01    6.82
  11  13   1    4.05    5.67
 -11 -13  -1   16.95    4.97
 -13 -13  -1   14.94    5.58
  13  13   1   -1.76    5.19
 -13 -13  -1   11.01    4.86
 -13 -13  -1    4.63    5.85
 -13  13  -1    2.11    6.57
  13  13   1   12.69    6.24
  15  13   1    9.13    4.75
 -15  13  -1    6.83    6.37
 -15 -13  -1   16.49    6.67
  15  13   1   13.44    6.49
 -15 -13  -1   -8.32    4.88
  15  13   1   10.87    6.42
 -15 -13  -1    6.90    4.97
  17  13   1    6.06    5.20
 -17  13  -1    0.48    6.15
 -17 -13  -1   -1.77    5.31
 -17 -13  -1    2.03    4.89
  17  13   1   -0.09    6.57
 -17 -13  -1    1.63    6.02
  17  13   1    2.47    6.11
  19  13   1    5.26    5.33
 -19 -13  -1   -1.52    5.58
 -19 -13  -1   11.81    5.68
  19  13   1    2.70    3.44
 -19 -13  -1   -6.52    5.41
  19  13   1    3.48    6.64
 -19  13  -1    1.58    6.29
  19  13   1    0.77    6.66
  21  13   1   -1.06    3.86
 -21  13  -1    6.24    6.82
 -21 -13  -1   -2.19    6.18
 -21 -13  -1   -9.60    5.28
  21  13   1    0.16    6.34
  21  13   1    2.94    6.25
  21  13   1   -0.86    5.19
  23  13   1   10.12    5.81
 -23 -13  -1    6.29    6.14
  23  13   1    3.95    6.17
 -23 -13  -1   14.60    7.34
 -23  13  -1    1.34    6.58
  23  13   1   13.26    7.74
  23  13   1    6.40    4.30
 -25  13  -1    4.45    6.62
  25  13   1   -4.19    6.21
 -25  13  -1   -2.42    2.88
  25  13   1   -3.28    5.91
 -25 -13  -1  -13.12    5.68
  25  13   1   -2.80    4.74
  25  13   1    7.57    4.54
  27 -13   1    3.39    3.12
 -27  13  -1    7.16    3.39
 -27  13  -1    5.11    6.51
  27  13   1    2.15    5.50
 -27 -13  -1    1.07    6.58
  27 -13   1   -2.16    3.67
 -27  13  -1    1.43    3.28
  27  13   1    6.34    4.71
  29 -13   1   -0.76    3.29
 -29  13  -1   15.38    7.56
 -29 -13  -1   -3.77    6.01
  29  13   1   -1.52    4.41
  29  13   1    6.79    5.96
 -29  13  -1    4.85    3.80
 -29  13  -1    4.40    3.68
  31  13   1    3.13    4.95
  31 -13   1   -0.65    3.50
 -31  13  -1   -1.40    3.86
 -31  13  -1    0.66    3.80
 -31  13  -1    1.27    6.96
 -31 -13  -1   -2.05    6.72
  33 -13   1    0.48    3.89
  33  13   1    6.39    5.29
 -33  13  -1    1.17    3.96
 -33  13  -1    5.59    6.83
 -33 -13  -1    2.42    7.30
 -33  13  -1    2.79    4.25
 -35  13  -1    2.32    4.29
 -35 -13  -1   14.21    8.61
 -35  13  -1    1.95    4.54
 -35  13  -1   -1.59    6.56
  35 -13   1   -2.55    3.83
  35  13   1   -0.72    5.20
 -37 -13  -1    4.47    7.69
  37  13   1   -0.15    5.67
 -37  13  -1    0.35    4.57
 -37  13  -1    7.34    4.81
 -37  13  -1    7.88    7.42
  37 -13   1   -3.54    4.12
 -39  13  -1    0.35    4.64
 -39 -13  -1    0.89    7.88
 -39  13  -1    3.09    4.94
  39  13   1   -0.99    5.47
 -39  13  -1    7.56    7.23
  39 -13   1   -6.73    4.37
 -38 -14   1   19.34    8.76
 -38  14   1   11.35    4.91
 -38  14   1    6.56    4.95
  38 -14  -1    6.33    4.16
 -38  14   1   13.94    8.60
 -36  14   1   19.57    8.99
 -36 -14   1   21.38    8.24
 -36  14   1   12.10    4.77
  36 -14  -1   13.92    4.63
 -36  14   1   15.59    4.92
 -34  14   1    7.49    7.58
  34 -14  -1    4.54    4.05
  34  14  -1   -0.03    4.94
 -34  14   1   -1.82    4.03
 -34 -14   1   19.71    8.22
 -34  14   1    4.19    4.43
 -32  14   1   15.02    7.68
  32 -14  -1    9.03    3.78
 -32  14   1   18.93    4.69
  32  14  -1   12.83    5.05
 -32  14   1   17.63    4.57
 -32 -14   1    2.73    6.74
 -30 -14   1   20.16    8.14
 -30  14   1   31.46    9.00
  30  14  -1   25.85    5.32
  30 -14  -1   32.18    4.82
 -30  14   1   31.69    5.02
 -30  14   1   28.83    4.99
  28  14  -1   16.43    4.67
 -28 -14   1   17.90    7.35
  28 -14  -1   14.14    3.67
 -28  14   1   13.37    7.73
 -28  14   1   14.77    4.18
 -28  14   1   23.99    4.33
  26  14  -1   25.59    4.48
  26 -14  -1   14.42    3.68
  26 -14  -1   27.34    4.02
  26  14  -1   28.84    8.81
 -26  14   1   22.14    4.09
  26  14  -1   32.48    8.40
 -26  14   1   20.84    8.28
 -26  14   1   20.21    4.08
 -26 -14   1   15.83    7.34
 -24  14   1   41.67    9.16
  24  14  -1   53.87    9.45
  24 -14  -1   45.84    4.75
 -24  14   1   46.30    4.90
  24  14  -1   46.95    4.79
  24  14  -1   59.43    9.91
  24 -14  -1   48.19    4.63
 -24 -14   1   51.49    9.20
 -24  14   1   43.19    4.75
  22 -14  -1   41.43    4.37
 -22  14   1   41.02    4.48
 -22  14   1   39.06    4.35
 -22 -14   1   51.22    9.18
  22 -14  -1   35.59    4.14
 -22  14   1   23.69    8.25
  22  14  -1   50.55    9.32
  22  14  -1   63.83    9.79
  20  14  -1   47.19    9.36
 -20 -14   1   62.35   10.01
  20  14  -1   78.91   10.77
 -20  14   1   66.08   10.94
 -20  14   1   67.04    5.33
  18  14  -1   29.58    8.08
 -18  14   1   17.92    7.39
  18  14  -1   27.66    7.63
 -18 -14   1   21.03    7.30
  16  14  -1  108.86   11.28
 -16  14   1   80.32   11.17
  16  14  -1   95.52   11.04
  16 -14  -1   73.95    5.62
 -16 -14   1   91.35    9.10
 -16 -14   1  100.66   10.81
  14 -14  -1   58.76    5.06
  14  14  -1   86.71   10.05
 -14 -14   1   83.46    8.27
 -14  14   1   62.78    5.48
 -14  14   1   78.16   10.78
  14 -14  -1   69.12    5.34
  14  14  -1   72.85    7.63
 -14  14   1   69.24    5.48
  14  14  -1   77.19    9.79
 -14 -14   1   57.63    8.75
 -12 -14   1   94.08    9.81
 -12  14   1   87.98    6.51
  12  14  -1   90.97    7.97
  12 -14  -1   90.87    6.43
  12  14  -1   87.04   10.05
 -12  14   1   90.63   11.94
 -12  14   1   99.32    6.75
 -12 -14   1  110.14    8.95
 -12 -14   1  119.59   10.95
  12  14  -1   85.35    9.99
  12 -14  -1   81.99    6.12
 -10  14   1   82.69    6.63
  10 -14  -1   78.99    6.34
  10  14  -1   94.07    7.32
 -10  14   1   85.22   11.19
 -10 -14   1   83.00    7.70
  10  14  -1   69.28    9.03
 -10  14   1   80.84    6.59
 -10 -14   1   84.88    8.98
 -10 -14   1   87.66    9.44
  10 -14  -1   82.61    6.23
  10  14  -1   79.09    9.25
   8 -14  -1  122.63    8.44
  -8  14   1  125.50    8.48
   8  14  -1  134.01   11.06
  -8  14   1  127.82    8.62
   8 -14  -1  124.11    8.26
  -8 -14   1  121.08    8.93
  -8 -14   1  152.69   11.12
  -8 -14   1  119.46   10.78
  -8  14   1  124.99   13.20
   8  14  -1  129.53   11.12
   6 -14  -1  116.28    8.40
  -6  14   1  116.37    8.84
  -6  14   1  123.17    8.95
  -6 -14   1  129.98   10.77
   6  14  -1  123.99   10.50
  -6  14   1  113.53   12.69
  -6 -14   1  137.11    8.81
  -6 -14   1  139.83   10.29
  -6  14   1  134.46    8.99
   6 -14  -1  133.19    9.03
   6  14  -1  139.06   10.84
   4  14  -1   24.26    5.60
   4  14  -1   18.34    5.35
   4 -14  -1   19.58    4.41
  -4 -14   1   24.22    4.07
   4 -14  -1   27.43    5.17
  -4  14   1   19.61    5.30
  -4  14   1   30.07    5.20
  -4 -14   1   28.06    5.13
  -4 -14   1   28.14    5.99
  -2 -14   1  173.30   11.58
   2 -14  -1  183.32   11.65
   2  14  -1  200.26   12.38
  -2  14   1  181.19   11.99
   2  14  -1  182.60   12.14
  -2 -14   1  179.90   12.12
   2 -14  -1  174.21   11.70
  -2  14   1  189.92   11.96
   0 -14   1   31.97    5.70
   0  14   1   37.66    6.21
   0  14   1   29.68    5.82
   0 -14  -1   29.98    4.12
   0 -14   1   39.43    5.27
   0 -14  -1   22.19    5.64
   0  14  -1   43.13    5.67
   0  14  -1   37.70    5.68
   0 -14  -1   36.96    5.63
   2 -14   1   64.06    6.77
  -2 -14  -1   75.38    6.20
  -2 -14  -1   74.65    7.49
   2 -14   1   70.07    6.17
  -2  14  -1   70.31    6.66
  -2 -14  -1   71.21    7.82
   2  14   1   71.21    8.02
   2  14   1   88.31    8.38
  -2  14  -1   67.31    6.71
   4 -14   1  129.98    8.24
  -4 -14  -1  126.46    8.81
  -4  14  -1  130.53    8.84
   4  14   1  136.29   10.87
  -4  14  -1  129.20    8.58
  -4 -14  -1  110.84   10.31
   4 -14   1  148.70    8.96
  -4 -14  -1  130.74   10.32
   4  14   1  113.74   10.26
  -6  14  -1   35.51    4.43
   6 -14   1   38.42    4.61
   6  14   1   36.91    4.87
   6  14   1   36.99    6.64
  -6 -14  -1   34.59    5.27
  -6  14  -1   32.29    4.65
  -6 -14  -1   24.64    6.47
  -6 -14  -1   49.72    6.84
   6  14   1   41.11    7.10
   6 -14   1   38.61    4.19
  -8 -14  -1   74.80    7.34
  -8 -14  -1   70.32    8.70
   8  14   1   64.11    8.62
  -8  14  -1   79.85    5.67
  -8  14  -1   65.85    5.39
   8  14   1   72.29    6.72
  -8 -14  -1   76.56    8.44
   8  14   1   59.14    8.52
 -10 -14  -1   78.83    9.05
  10  14   1   87.97    9.77
 -10 -14  -1   72.37    7.78
 -10 -14  -1   61.99    8.80
  10  14   1   85.79    9.67
  10  14   1   86.18    7.70
  12  14   1   13.91    6.51
 -12 -14  -1   25.01    7.01
  12  14   1   18.57    5.31
  12  14   1   11.52    6.36
 -12 -14  -1   17.85    5.51
 -12  14  -1    7.00    7.18
 -14  14  -1   89.96   12.24
 -14 -14  -1   89.78   10.31
 -14 -14  -1   81.33    8.78
  14  14   1   88.52   10.68
  14  14   1   84.08   10.37
 -16 -14  -1   26.48    7.33
  16  14   1   33.31    8.22
 -16 -14  -1   31.30    6.59
  16  14   1   22.84    7.50
 -16  14  -1    9.27    7.64
  18  14   1  162.85   14.58
 -18 -14  -1  161.56   12.66
  18  14   1  164.23   12.81
  18  14   1  169.96   14.73
 -18 -14  -1  143.86   13.95
 -18  14  -1  142.78   15.13
  20  14   1   77.67   10.66
  20  14   1   80.29   10.68
 -20 -14  -1   59.87    9.78
 -20  14  -1   67.81   10.93
  22  14   1  126.50   13.22
  22  14   1  108.85    7.76
  22  14   1  107.32   12.36
 -22 -14  -1  108.51   12.33
 -22  14  -1  124.15   13.63
  24  14   1   19.02    8.17
  24  14   1   31.63    8.26
 -24 -14  -1   22.27    7.68
 -24  14  -1   28.34    8.38
  24  14   1   27.03    4.78
 -26  14  -1   43.53    9.48
  26  14   1   39.56    5.80
 -26 -14  -1   47.35    9.38
 -28  14  -1   19.90    3.81
 -28 -14  -1   12.41    7.63
  28  14   1   27.81    5.53
  28 -14   1   20.44    3.63
 -28  14  -1   20.13    8.14
 -30  14  -1   44.69    5.27
 -30 -14  -1   45.17   10.02
  30 -14   1   38.59    4.95
 -30  14  -1   36.95    9.78
  30  14   1   33.52    6.36
 -30  14  -1   47.27    5.22
 -32 -14  -1    7.56    7.75
 -32  14  -1   13.17    4.11
  32 -14   1   12.91    3.95
  32  14   1    4.48    5.13
 -32  14  -1   10.49    3.99
 -32  14  -1   12.83    8.20
  34  14   1   21.76    6.15
 -34 -14  -1   20.98    8.36
 -34  14  -1   18.16    8.28
 -34  14  -1   24.89    5.07
 -34  14  -1   30.41    5.16
  34 -14   1   22.09    4.73
 -36  14  -1   17.65    5.02
 -36  14  -1   16.02    5.04
 -36 -14  -1   20.10    9.48
  36 -14   1   28.29    5.10
 -36  14  -1   26.25    8.91
 -35  15   1   20.13    4.94
 -35  15   1    9.81    4.31
 -35 -15   1   26.74    8.67
 -35  15   1    8.90    8.01
  35 -15  -1   20.06    4.56
 -33  15   1   -1.79    3.69
  33 -15  -1   -0.11    3.62
 -33  15   1   -0.75    7.41
 -33  15   1    5.18    4.30
 -33 -15   1    4.41    7.16
 -31  15   1   22.18    4.53
 -31  15   1   24.69    9.25
 -31 -15   1   28.87    8.69
  31 -15  -1   25.16    4.54
 -31  15   1   29.69    4.97
 -29  15   1   -3.06    3.35
  29 -15  -1   -0.37    3.12
 -29 -15   1   -1.10    6.62
 -29  15   1    0.04    3.50
 -29  15   1    2.40    7.25
 -27  15   1   20.39    4.02
 -27 -15   1   24.17    8.18
 -27  15   1   27.97    4.37
  27 -15  -1   22.60    3.94
 -27  15   1   26.48    8.93
  25 -15  -1   -0.18    2.79
 -25  15   1    2.21    6.96
 -25  15   1    2.06    3.03
 -25  15   1   -5.89    2.80
  25  15  -1   -7.88    5.97
  25  15  -1   10.53    6.97
  25 -15  -1    2.71    3.08
 -25 -15   1   12.09    7.03
  23  15  -1   33.57    8.38
  23 -15  -1   40.61    4.22
  23  15  -1   37.28    9.00
 -23  15   1   39.76    9.21
 -23 -15   1   34.50    8.26
  21  15  -1   -3.10    6.20
  21  15  -1    8.22    6.51
 -21  15   1   15.97    7.59
 -21 -15   1   -8.70    5.55
 -19 -15   1  183.66   15.45
  19  15  -1  185.37   15.49
 -19  15   1  172.00   16.40
  19  15  -1  155.05   14.72
  17  15  -1   21.81    7.53
  17  15  -1   25.18    7.46
 -17  15   1    4.41    6.92
 -17 -15   1   14.72    6.99
  17 -15  -1    9.51    2.85
  15  15  -1  113.50   11.59
 -15  15   1   99.70    6.89
 -15 -15   1  102.07   11.33
 -15  15   1   98.50    6.84
  15  15  -1   91.28   10.85
 -15  15   1   94.38   12.45
 -15 -15   1  113.83    9.81
 -13  15   1    5.30    7.23
 -13  15   1   -2.35    3.26
  13 -15  -1   -0.86    2.83
  13  15  -1    0.68    5.87
 -13  15   1    1.71    3.57
  13  15  -1    7.80    6.04
  13 -15  -1    1.65    2.93
 -13 -15   1    1.04    4.49
 -13 -15   1    3.18    6.02
 -11  15   1  157.17   15.36
 -11  15   1  172.43    9.96
 -11  15   1  170.36    9.97
  11  15  -1  154.62   13.27
 -11 -15   1  177.08   11.66
  11  15  -1  156.35   13.13
  11 -15  -1  151.73    9.49
 -11 -15   1  143.20   12.89
  11 -15  -1  156.31    9.53
  -9  15   1   -0.37    3.87
   9  15  -1    3.45    5.50
   9 -15  -1    6.58    3.71
   9 -15  -1    1.87    3.45
   9  15  -1    4.00    5.48
  -9  15   1    2.84    7.23
  -9 -15   1   -4.87    4.81
  -9 -15   1    2.65    4.31
  -9  15   1    7.68    3.92
   7  15  -1  237.88   15.96
   7 -15  -1  215.58   13.34
  -7 -15   1  249.48   13.76
  -7  15   1  243.63   13.77
  -7  15   1  242.25   13.68
  -7 -15   1  237.50   15.99
  -7 -15   1  245.95   15.63
   7  15  -1  254.58   16.23
  -7  15   1  251.52   19.42
   7 -15  -1  250.39   13.64
   5 -15  -1   30.20    4.97
  -5  15   1   22.02    5.06
  -5 -15   1   29.52    6.80
  -5 -15   1   23.47    5.31
   5  15  -1   25.40    6.15
   5 -15  -1   18.67    5.04
  -5  15   1   25.56    5.29
   5  15  -1   34.95    6.45
  -5  15   1   20.89    5.36
  -3  15   1   18.28    5.15
  -3 -15   1   24.10    5.17
   3  15  -1   14.23    5.44
  -3 -15   1   17.52    5.70
   3 -15  -1   20.90    4.86
  -3  15   1   29.03    5.86
   3  15  -1   18.72    5.35
   3 -15  -1   20.32    5.27
   1  15  -1   -0.37    4.68
  -1 -15   1    4.37    4.48
   1 -15  -1    5.10    4.49
   1  15  -1   -1.50    4.65
   1 -15  -1    1.99    4.04
  -1  15   1    1.48    4.52
  -1 -15   1   -1.73    3.84
  -1  15   1   12.23    5.06
   1 -15   1   11.44    4.90
  -1 -15  -1    5.26    4.43
   1  15   1   10.54    5.35
  -1  15  -1   12.28    4.74
  -1  15  -1   16.30    5.01
   1  15   1    2.49    4.94
  -1 -15  -1   20.88    5.72
   1 -15   1   12.78    4.22
  -3  15  -1    1.72    4.11
   3  15   1    8.65    5.40
  -3  15  -1    6.18    4.14
   3 -15   1   -1.77    3.20
   3  15   1    7.11    5.09
   3 -15   1    2.11    3.88
  -3 -15  -1   -0.98    3.73
  -3 -15  -1   -0.98    4.70
  -3 -15  -1    2.80    4.48
  -5  15  -1   18.20    4.31
   5 -15   1   21.66    3.92
   5  15   1   14.05    6.17
   5  15   1   11.16    5.81
  -5 -15  -1   28.76    5.19
   5 -15   1   31.13    4.87
  -5  15  -1   23.05    4.73
  -5 -15  -1   20.35    5.97
  -5 -15  -1   10.31    5.06
   7 -15   1    8.38    3.79
  -7 -15  -1    2.83    4.47
   7  15   1   -6.18    4.96
  -7  15  -1    6.55    3.67
  -7  15  -1    0.85    3.27
   7  15   1    5.27    5.54
  -7 -15  -1   -4.54    5.24
   7 -15   1    8.04    2.96
   9  15   1    6.51    6.06
   9  15   1   10.14    6.08
  -9 -15  -1   16.77    5.20
  -9 -15  -1   11.82    6.17
  11  15   1   11.66    6.51
 -11 -15  -1   13.84    6.44
  11  15   1   23.66    7.10
 -11 -15  -1   15.01    5.38
 -13 -15  -1    7.61    6.27
  13  15   1   11.30    6.37
  13  15   1    6.87    6.20
 -13 -15  -1   15.10    5.66
 -13  15  -1    8.94    7.13
 -15  15  -1    6.18    6.59
 -15 -15  -1    9.25    6.40
  15  15   1    0.54    5.92
  15  15   1   -1.34    5.92
 -15 -15  -1   -0.05    5.07
  17  15   1   23.39    7.43
 -17 -15  -1   31.66    6.64
 -17 -15  -1   19.25    7.09
  17  15   1   16.23    7.01
 -17  15  -1   18.23    7.81
  19  15   1   -4.51    5.30
 -19 -15  -1    0.63    6.01
 -19  15  -1    4.22    6.38
 -19 -15  -1   -1.58    4.82
  19  15   1   -5.25    5.49
 -21 -15  -1   42.72    8.80
  21  15   1   30.31    8.18
 -21  15  -1   25.00    8.30
  21  15   1   61.56    9.74
 -23 -15  -1    4.29    6.77
 -23  15  -1    0.94    6.47
  23  15   1    4.58    6.76
  23  15   1   -8.76    5.28
  25  15   1   35.62    4.83
 -25  15  -1   59.90   10.63
 -27  15  -1   -5.22    6.07
  27  15   1    7.68    4.31
 -27 -15  -1   13.76    7.43
  29 -15   1   47.09    4.95
 -29  15  -1   44.70   10.40
 -29 -15  -1   35.60    9.35
  31 -15   1   -2.31    3.37
 -31  15  -1   -6.24    3.34
 -31 -15  -1    0.62    7.53
 -31  15  -1    3.02    3.46
 -31  15  -1   -0.90    6.69
  33 -15   1   12.85    3.78
 -33  15  -1   18.14    4.12
 -33  15  -1   13.76    4.00
 -33  15  -1    5.08    7.57
 -33 -15  -1   22.92    8.42
 -35  15  -1   -3.89    6.80
  35 -15   1   -1.68    3.59
 -35  15  -1    1.34    3.87
 -35 -15  -1    5.06    7.76
 -35  15  -1    1.15    3.89
 -34  16   1   32.71   10.42
 -34  16   1   37.25    5.23
 -34 -16   1   31.10    9.32
 -34  16   1   27.04    4.96
  34 -16  -1   36.89    5.30
 -32  16   1   38.42   10.37
 -32  16   1   32.30    4.82
 -32  16   1   31.86    4.84
  32 -16  -1   30.78    4.73
 -32 -16   1   26.95    8.90
 -30  16   1    0.22    3.59
 -30  16   1    0.23    7.60
 -30  16   1    0.93    3.45
 -30 -16   1    1.73    7.36
  30 -16  -1   -0.77    3.44
  28 -16  -1   48.49    5.30
 -28 -16   1   55.94   10.41
 -28  16   1   53.67   11.00
 -26  16   1   40.42   10.03
 -26 -16   1   33.91    8.71
 -24  16   1   28.16    9.09
  24 -16  -1   18.66    3.55
  24  16  -1   32.72    9.17
 -24 -16   1   24.75    8.03
  24  16  -1   22.96    8.18
 -22 -16   1   99.55   12.10
  22  16  -1  125.52   13.32
 -22  16   1   65.21   11.66
  22  16  -1   83.30   11.54
  20  16  -1   90.26   11.41
 -20  16   1   74.29   11.93
  20  16  -1   95.50   11.73
 -20 -16   1   64.32    9.94
  18  16  -1   14.15    6.82
 -18  16   1   16.59    7.98
 -18 -16   1   21.55    6.92
  18  16  -1   15.63    7.05
  16  16  -1   68.83    9.47
  16  16  -1   50.66    9.02
  16 -16  -1   45.62    4.61
 -16  16   1   43.75    4.58
  16 -16  -1   43.28    4.45
 -16 -16   1   46.55    7.23
 -16  16   1   45.81    9.99
 -16 -16   1   49.60    8.77
 -14  16   1   16.52    3.65
  14  16  -1    5.10    6.23
 -14  16   1    8.01    7.02
  14  16  -1    6.98    6.09
 -14 -16   1   11.35    5.15
  14 -16  -1   11.05    3.35
 -14 -16   1   15.85    6.53
  14 -16  -1    8.85    3.06
 -14  16   1   14.85    3.55
  12 -16  -1   -6.45    2.82
  12  16  -1   -1.20    5.18
 -12 -16   1    1.31    4.58
  12  16  -1    3.13    5.70
 -12 -16   1    5.12    5.83
  12 -16  -1    1.44    2.95
 -12  16   1   -1.40    6.36
 -12  16   1   -2.90    3.23
 -12  16   1   -3.38    3.31
  10  16  -1   19.17    6.38
 -10  16   1   12.78    3.94
  10  16  -1   11.84    6.28
 -10  16   1    9.81    7.36
  10 -16  -1    6.30    3.50
 -10  16   1   14.96    4.16
  10 -16  -1   11.21    3.59
 -10 -16   1   19.73    6.53
   8  16  -1   14.31    6.28
  -8  16   1   15.71    8.18
   8  16  -1   16.00    6.21
  -8  16   1   18.43    4.54
  -8 -16   1   14.49    6.00
   8 -16  -1   19.99    4.73
   8 -16  -1   10.15    4.19
  -8  16   1   17.30    4.41
   6  16  -1   66.27    8.37
  -6 -16   1   79.46    9.09
   6 -16  -1   86.46    7.71
  -6  16   1   72.56    7.34
   6  16  -1   68.68    8.72
   6 -16  -1   74.83    7.02
  -6  16   1   76.02    7.28
  -4  16   1   54.06    6.92
   4 -16  -1   66.67    6.75
  -4 -16   1   56.97    7.92
  -4  16   1   67.27    7.15
   4 -16  -1   70.69    7.42
  -4  16   1   51.86    6.99
   4  16  -1   54.27    7.69
   4  16  -1   52.05    7.67
  -2 -16   1  109.79    9.34
   2 -16  -1  117.28    9.40
  -2  16   1  109.73    9.64
  -2 -16   1   92.53    9.73
   2  16  -1  107.74    9.70
   2  16  -1  116.71   10.00
  -2  16   1  127.09    9.99
   2 -16  -1  126.29    9.95
   0  16   1  246.74   15.10
   0  16  -1  239.87   14.51
   0 -16   1  228.22   14.44
   0  16   1  232.22   14.92
   0  16  -1  229.91   14.31
   0 -16  -1  197.93   14.31
   0 -16   1  242.08   14.05
   2 -16   1   17.88    4.56
   2 -16   1   12.13    5.16
  -2  16  -1   23.44    5.30
  -2  16  -1   16.74    5.00
   2  16   1   31.57    6.28
  -2 -16  -1   14.51    5.94
   2  16   1   22.68    6.09
  -4  16  -1   95.46    7.66
   4 -16   1   93.88    7.34
  -4  16  -1   92.95    7.74
   4  16   1  104.27    9.95
   4 -16   1   80.51    7.69
   4  16   1   91.67    9.77
  -4 -16  -1   71.01    8.94
   6  16   1   76.34    9.37
   6 -16   1   89.95    6.84
  -6 -16  -1   87.64    9.67
   6 -16   1   95.28    7.50
  -6  16  -1   93.76    7.33
   6  16   1   85.88    9.61
  -6  16  -1   98.39    7.44
  -8 -16  -1    2.46    5.39
   8 -16   1   -4.87    3.16
  -8  16  -1   -3.46    3.14
   8  16   1   -6.76    4.74
   8 -16   1    1.32    2.83
  -8  16  -1    6.23    3.30
   8  16   1    0.42    5.48
 -10 -16  -1   39.22    6.25
  10  16   1   29.57    7.24
  10  16   1   15.51    6.39
 -10 -16  -1   13.29    6.20
 -12 -16  -1   35.62    6.46
  12  16   1   39.43    7.73
  12  16   1   40.59    8.07
 -12 -16  -1   28.77    7.26
 -14 -16  -1    4.06    6.19
  14  16   1    7.88    6.16
  14  16   1    5.66    6.00
 -14 -16  -1    7.69    5.07
 -16 -16  -1    7.92    5.13
  16  16   1   15.02    6.84
 -16  16  -1   10.97    7.26
  16  16   1   28.61    7.65
 -16 -16  -1   16.48    6.65
 -18  16  -1   12.45    7.73
 -18 -16  -1   17.39    5.95
  18  16   1    7.43    6.20
 -18 -16  -1    8.93    6.59
  18  16   1   24.51    7.59
 -20  16  -1   30.15    9.21
 -20 -16  -1   32.58    8.36
  20  16   1   47.31    9.13
  20  16   1   44.90    9.08
  22  16   1   -7.85    5.66
 -22  16  -1   -5.18    5.94
 -22 -16  -1    2.38    6.48
  22  16   1    1.06    6.43
 -24  16  -1   24.77    8.90
 -24 -16  -1   17.91    7.87
 -26  16  -1   22.53    8.64
 -26 -16  -1   49.14   10.18
 -28  16  -1    5.09    7.29
 -28 -16  -1    0.16    7.07
 -30  16  -1   42.48   10.54
 -30 -16  -1   34.49    9.64
  32 -16   1   38.57    4.94
 -32  16  -1   47.05   10.57
 -32 -16  -1   41.74   10.16
  31 -17  -1   10.75    3.59
 -31 -17   1    8.75    7.78
 -31  17   1   21.44    8.87
  29 -17  -1   -3.77    3.11
 -29 -17   1   -0.53    7.22
 -29  17   1    7.48    8.30
 -27 -17   1   20.45    8.17
 -27  17   1   14.53    8.23
 -25  17   1  -11.84    6.06
 -25 -17   1    0.48    6.61
 -23  17   1    0.66    6.24
 -23 -17   1   11.31    7.67
  21  17  -1   12.68    7.01
  21  17  -1    4.24    6.89
 -21 -17   1   -0.12    5.89
 -21  17   1    3.14    7.06
  19  17  -1    0.24    5.81
 -19  17   1    4.21    7.16
 -19 -17   1   -1.68    5.97
  19  17  -1   -0.83    5.92
  17  17  -1   -6.94    5.79
  17  17  -1   10.15    6.41
 -17  17   1    1.50    7.13
  17 -17  -1    0.60    2.72
 -17 -17   1    0.33    6.01
 -15  17   1   10.60    3.25
 -15 -17   1    2.93    5.51
 -15  17   1    6.63    7.67
  15 -17  -1    5.68    2.84
 -15  17   1    5.27    3.05
  15  17  -1   -0.30    5.79
  15 -17  -1    4.60    2.97
  15  17  -1   13.52    6.42
 -13  17   1   -5.74    6.75
  13  17  -1   -7.00    5.45
 -13 -17   1   10.56    6.19
 -13  17   1   -0.36    3.33
  13  17  -1   -3.49    5.30
  13 -17  -1    0.90    2.87
 -13  17   1    2.67    3.27
  13 -17  -1    1.01    2.94
  11 -17  -1   -1.66    3.26
 -11  17   1    0.25    6.80
 -11  17   1    7.20    3.53
 -11  17   1    0.39    3.64
  11  17  -1    0.89    5.50
 -11 -17   1    1.35    5.36
  11  17  -1   -4.49    5.03
  11 -17  -1    6.13    2.97
   9  17  -1    1.60    5.30
  -9 -17   1   -2.10    5.24
  -9  17   1    2.08    3.74
  -9  17   1   -1.36    3.54
   9 -17  -1    5.89    3.87
   9  17  -1    2.77    5.41
   7  17  -1    8.90    5.52
   7  17  -1   15.92    5.81
  -7 -17   1   10.46    5.84
  -7  17   1   14.68    4.56
  -7  17   1    7.05    4.34
   7 -17  -1    5.99    4.35
   5 -17  -1    3.39    4.18
  -5  17   1   -1.39    4.21
  -5  17   1   -2.75    3.86
   5  17  -1    2.39    4.86
  -5 -17   1   -1.91    4.67
   5  17  -1   -5.68    4.36
  -3  17   1   -6.31    4.10
  -3 -17   1    5.73    5.02
   3  17  -1   -0.45    4.64
  -3  17   1    1.93    4.83
  -3  17   1    0.84    4.51
   3  17  -1    6.76    4.88
   3 -17  -1   -1.62    4.15
   1 -17  -1    4.83    4.97
  -1  17   1   -0.22    4.86
  -1 -17   1    1.76    4.61
   1  17  -1   -4.98    4.33
   1  17  -1   -5.15    4.47
  -1  17   1   -1.25    4.42
   1  17   1    8.27    5.43
  -1  17  -1   -3.96    4.17
   1 -17   1   -5.07    4.00
   1  17   1   -1.95    4.76
  -1  17  -1    3.38    4.58
  -1 -17  -1    6.36    5.01
  -3 -17  -1    5.60    5.08
   3  17   1    0.61    5.07
  -3  17  -1    5.54    4.01
   3 -17   1   -0.60    3.73
  -3  17  -1    0.37    3.86
   3  17   1   -1.37    5.01
   5 -17   1   -3.53    3.00
  -5 -17  -1    5.10    5.55
   5  17   1   -2.36    4.78
  -5  17  -1   -4.75    3.34
   5 -17   1   -1.78    3.59
  -5  17  -1    3.21    3.93
   5  17   1    3.20    4.94
   7  17   1   -4.60    5.01
   7 -17   1    0.97    3.56
  -7  17  -1    2.22    3.57
   7  17   1    7.17    5.60
  -7  17  -1   -1.70    3.29
  -7 -17  -1   -0.28    5.11
   7 -17   1    2.21    3.02
  -9 -17  -1   -4.10    4.79
  -9  17  -1    5.21    3.13
   9 -17   1   -1.51    3.18
   9  17   1    7.58    6.05
   9 -17   1    1.66    2.78
  -9  17  -1    1.16    3.31
   9  17   1   -1.37    5.26
  11  17   1    3.31    5.36
  11  17   1   13.12    6.55
 -11 -17  -1   -0.72    5.20
 -13 -17  -1    1.80    5.76
  13  17   1    6.18    6.45
  13  17   1   10.71    5.86
 -15 -17  -1    8.67    5.41
  15  17   1    8.83    6.14
  15  17   1    5.82    6.23
 -15 -17  -1   -4.62    5.46
  17  17   1   18.69    7.14
  17  17   1    5.60    6.47
 -17 -17  -1   13.65    6.96
 -17 -17  -1   22.31    6.61
 -19  17  -1   -2.29    6.46
 -19 -17  -1   10.56    6.92
  19  17   1    2.83    6.49
  19  17   1   -6.38    6.24
 -21  17  -1   16.66    8.38
 -21 -17  -1   -6.28    6.32
 -23  17  -1   -3.48    6.71
 -23 -17  -1   -0.36    6.45
 -25 -17  -1    2.03    7.10
 -25  17  -1   -0.89    7.27
 -27 -17  -1   -2.28    7.41
 -27  17  -1    9.40    7.72
 -29  17  -1    0.96    7.40
 -29 -17  -1   10.81    8.51
 -28  18   1   20.89    9.61
 -28 -18   1   17.60    8.95
 -26  18   1    4.75    7.75
 -26 -18   1   17.26    7.65
 -24  18   1   15.04    8.72
 -24 -18   1   11.40    7.63
 -22  18   1   34.33    9.69
 -22 -18   1   36.37    9.04
  20  18  -1   26.26    8.27
 -20 -18   1   12.88    7.24
 -20  18   1   26.06    9.06
  20  18  -1   21.83    7.93
 -18  18   1    8.46    8.22
  18 -18  -1   13.08    3.16
 -18 -18   1   22.15    7.38
  18  18  -1   14.27    7.68
  18  18  -1   31.71    8.17
  16 -18  -1   23.35    3.74
  16  18  -1   17.70    7.72
 -16 -18   1   24.13    7.70
 -16  18   1   21.84    3.79
 -16  18   1   15.84    8.65
  16  18  -1   25.72    7.68
 -14  18   1   50.69    5.19
  14 -18  -1   37.92    4.56
 -14  18   1   40.93    4.89
  14  18  -1   64.46    9.67
  14  18  -1   50.00    9.01
 -14 -18   1   50.85    8.57
 -14  18   1   43.05   10.43
  12  18  -1   38.48    8.29
 -12  18   1   37.82    5.11
 -12 -18   1   31.85    7.51
 -12  18   1   31.52    4.62
  12 -18  -1   28.06    4.38
  12  18  -1   27.18    7.23
 -10 -18   1    3.88    5.65
  10  18  -1   14.35    6.11
  10 -18  -1   17.03    3.93
  10  18  -1   25.21    6.71
 -10  18   1   12.31    4.27
 -10  18   1   17.77    4.35
   8 -18  -1   87.02    7.97
   8  18  -1  105.69   10.72
  -8  18   1   90.76    8.11
  -8  18   1   95.95    8.10
  -8 -18   1   97.25   10.35
   8  18  -1   89.32   10.40
  -6  18   1  142.12   10.18
   6  18  -1  117.35   11.29
  -6 -18   1  124.41   11.62
   6  18  -1  130.71   11.70
   6 -18  -1  124.68    9.78
  -6  18   1  137.76   10.10
   4 -18  -1   29.12    5.81
   4  18  -1   31.44    6.59
   4  18  -1   25.42    6.16
  -4  18   1   33.26    6.15
  -4  18   1   22.49    5.47
  -4 -18   1   30.68    6.44
  -2  18   1  139.99   11.44
  -2  18   1  145.20   11.47
   2  18  -1  147.32   11.71
  -2  18   1  158.61   12.01
  -2 -18   1  162.77   12.26
   2 -18  -1  148.67   11.60
   2  18  -1  154.39   11.91
   0  18  -1  108.72    9.28
   0  18  -1  103.70    9.31
   0  18   1   94.02    9.29
   0 -18  -1   93.08    9.33
   0  18   1   97.79    9.54
   0 -18   1   82.78    8.83
   0  18   1   88.47    9.45
   2  18   1   43.70    7.43
   2  18   1   33.25    6.60
   2 -18   1   23.05    5.58
  -2  18  -1   50.25    6.30
  -2  18  -1   38.27    6.06
  -2 -18  -1   38.97    7.05
  -4 -18  -1   77.55    9.27
   4  18   1   92.23    9.84
  -4  18  -1   70.85    7.33
   4 -18   1   89.37    7.81
  -4  18  -1   82.60    7.67
   4  18   1   75.64    9.18
  -6  18  -1   45.10    5.67
  -6 -18  -1   64.80    8.69
  -6  18  -1   54.64    6.06
   6  18   1   63.17    8.78
   6 -18   1   48.45    5.97
   6  18   1   48.23    8.20
  -8 -18  -1   31.85    7.31
   8 -18   1   20.34    4.35
   8  18   1   27.21    7.09
  -8  18  -1   25.75    4.59
  -8  18  -1   24.05    4.51
   8  18   1   28.93    7.38
  10  18   1   49.29    8.51
  10  18   1   46.88    8.43
  10 -18   1   56.11    5.46
 -10 -18  -1   49.75    8.56
 -12 -18  -1   61.68    9.57
  12  18   1   53.80    9.20
  12  18   1   60.64    9.42
  14  18   1  112.35   12.52
  14  18   1  106.06   11.90
 -14 -18  -1  100.86   11.97
 -16 -18  -1   47.29    9.20
  16  18   1   56.83    9.75
  16  18   1   39.95    9.08
  18  18   1  149.94   14.77
 -18 -18  -1  124.48   13.92
  18  18   1  130.46   14.01
 -20 -18  -1   78.75   11.37
 -22 -18  -1   31.59    8.93
 -22  18  -1   21.74    9.40
 -24 -18  -1   46.09    9.82
 -24  18  -1   28.89    9.79
 -26  18  -1   29.10   10.26
 -26 -18  -1   12.85    7.94
 -23  19   1   21.41    9.74
 -23 -19   1   21.54    8.27
 -21  19   1    7.02    8.29
 -21 -19   1   12.43    7.67
  19 -19  -1   12.38    3.18
 -19  19   1   11.69    8.79
  19  19  -1   24.05    8.00
 -19 -19   1    3.55    7.00
  19  19  -1   30.47    8.87
 -17 -19   1    4.15    6.73
  17  19  -1   -6.18    5.88
 -17  19   1    0.49    7.54
  17 -19  -1    2.30    2.87
  17  19  -1    4.44    6.70
  15 -19  -1   10.40    3.35
 -15  19   1    8.97    3.41
  15  19  -1   10.04    7.38
  15  19  -1    4.09    6.38
 -15 -19   1   10.80    6.83
 -15  19   1    6.85    3.86
 -13 -19   1    3.93    5.79
 -13  19   1   -0.46    3.93
  13  19  -1   -1.65    5.79
 -13  19   1   -1.91    3.45
  13 -19  -1   -1.37    3.24
  13  19  -1    4.43    6.36
  11  19  -1    5.74    6.45
 -11  19   1    8.54    3.88
  11  19  -1   13.06    6.48
 -11  19   1    8.75    4.10
 -11 -19   1   -6.08    5.66
  11 -19  -1    4.96    3.55
   9 -19  -1    4.50    3.83
  -9  19   1    8.74    4.33
   9  19  -1    7.30    5.70
  -9  19   1   10.70    4.51
   9  19  -1    2.70    5.90
  -9 -19   1    5.77    5.95
  -7  19   1   35.67    5.65
   7  19  -1   17.48    6.57
  -7 -19   1   24.10    7.07
   7 -19  -1   30.71    5.60
   7  19  -1   36.54    7.39
  -7  19   1   27.06    5.68
   5  19  -1   -8.62    4.79
  -5  19   1   -4.09    4.08
  -5 -19   1   -5.34    4.43
   5 -19  -1    4.46    4.43
   5  19  -1    2.35    5.71
  -5  19   1    2.97    4.52
  -3  19   1    5.12    4.94
   3 -19  -1   -3.39    4.27
  -3  19   1    2.46    4.54
   3  19  -1    2.44    5.19
  -3 -19   1   -3.96    4.40
   3  19  -1   -1.47    4.90
   1 -19  -1    4.00    4.98
  -1  19   1   10.36    5.17
   1  19  -1   -0.83    4.70
  -1  19   1    1.13    4.92
  -1 -19   1   -1.62    4.59
   1  19  -1    1.23    4.60
  -1  19   1    7.36    5.38
   1  19   1    5.74    5.45
   1 -19   1   -3.42    4.41
  -1 -19  -1    4.38    5.14
   1  19   1   -4.20    4.83
  -1  19  -1   -1.13    4.42
  -1  19  -1   -1.97    4.57
   1  19   1    9.31    5.69
   3  19   1   14.69    6.07
   3 -19   1   -1.25    4.28
  -3  19  -1   -4.51    4.08
  -3  19  -1    6.32    4.92
   3  19   1    2.49    5.85
  -3 -19  -1    3.60    5.39
   5 -19   1   -0.78    3.78
   5  19   1  -13.32    4.98
  -5  19  -1    2.73    4.25
   5  19   1    5.22    5.74
  -5  19  -1   -1.04    4.20
  -5 -19  -1   -1.66    5.25
   7  19   1    3.27    6.20
  -7 -19  -1   -0.04    5.14
  -7  19  -1   -1.31    4.07
   7 -19   1    0.75    3.59
   7  19   1    3.47    5.94
  -7  19  -1    7.04    4.18
  -9 -19  -1    3.32    5.78
   9 -19   1    7.93    3.54
  -9  19  -1   -1.59    3.30
   9  19   1    4.76    6.11
  -9  19  -1    2.57    3.71
   9  19   1    5.82    6.24
  11  19   1   -4.46    5.96
  11 -19   1    0.77    3.04
 -11 -19  -1   -4.85    5.70
  11  19   1    7.20    5.99
  13  19   1    3.67    6.10
  13  19   1    2.63    6.59
 -13 -19  -1    9.14    6.70
  15  19   1    3.42    6.76
 -15 -19  -1    0.71    6.16
  15  19   1   -3.30    6.40
 -17 -19  -1   -4.03    6.39
  17  19   1    0.15    6.42
  17  19   1    2.28    6.99
 -19 -19  -1   -0.98    6.97
 -21 -19  -1   -6.40    6.48
 -23 -19  -1    2.24    7.21
  18  20  -1   17.71    8.00
 -18 -20   1   -6.20    6.11
  18  20  -1   27.30    8.37
  18 -20  -1   13.91    3.35
 -16  20   1   24.01    3.92
  16  20  -1   24.16    8.32
  16 -20  -1   28.69    4.29
  16  20  -1   27.44    8.57
 -16 -20   1   36.87    8.37
  14 -20  -1   28.71    4.61
 -14  20   1   37.36    5.15
 -14  20   1   43.68    5.13
  14  20  -1   38.52    8.55
 -14 -20   1   44.31    8.78
  14  20  -1   34.32    8.93
 -12 -20   1   -0.45    5.46
  12 -20  -1   -0.82    3.43
 -12  20   1   -4.15    3.45
  12  20  -1   -8.08    6.33
  12  20  -1   -6.76    6.02
 -12  20   1   -1.18    3.84
  10  20  -1    7.03    6.39
 -10 -20   1    0.19    5.94
  10 -20  -1    8.72    3.90
 -10  20   1    9.30    4.22
 -10  20   1   11.63    4.38
  10  20  -1    4.86    6.64
  -8  20   1   31.81    5.74
  -8 -20   1   18.17    6.79
  -8  20   1   15.24    4.91
   8  20  -1   31.31    7.25
   8  20  -1   18.68    6.98
   8 -20  -1   22.38    4.74
  -6  20   1   46.76    6.81
   6  20  -1   28.92    7.15
  -6  20   1   46.50    6.51
   6  20  -1   50.85    8.61
   6 -20  -1   34.62    5.79
  -6 -20   1   51.10    8.24
   4 -20  -1   19.03    5.84
  -4 -20   1   10.07    5.60
   4  20  -1   29.00    7.03
   4  20  -1   13.97    6.05
  -4  20   1   13.90    5.13
  -4  20   1   16.21    5.75
  -2 -20   1   50.71    7.82
   2  20  -1   37.12    7.66
   2  20  -1   58.23    7.87
   2 -20  -1   56.73    7.69
  -2  20   1   59.28    7.87
  -2  20   1   55.91    7.89
   0  20  -1   51.48    7.52
   0  20   1   61.25    8.25
   0 -20  -1   55.26    8.09
   0  20   1   54.57    8.43
   0  20   1   58.16    8.31
   0  20  -1   62.05    8.26
   0 -20   1   62.25    8.08
  -2  20  -1   40.71    6.64
  -2  20  -1   36.66    6.66
   2  20   1   41.47    7.33
   2  20   1   47.53    8.17
   2 -20   1   38.85    6.84
   2  20   1   50.43    7.90
  -2 -20  -1   44.17    7.56
   4  20   1   45.12    8.21
  -4  20  -1   51.41    6.81
   4  20   1   60.01    9.02
  -4  20  -1   42.98    6.52
  -4 -20  -1   51.73    8.58
   4 -20   1   41.55    6.45
  -6  20  -1   83.62    7.99
  -6  20  -1   89.99    8.13
   6  20   1   82.91   10.71
  -6 -20  -1   69.45    9.92
   6 -20   1   75.78    7.81
   6  20   1  113.54   11.49
  -6  20  -1   91.36    7.96
  -8  20  -1    4.68    3.95
   8 -20   1   10.53    4.52
   8  20   1   15.03    6.81
  -8  20  -1   15.55    4.40
  -8 -20  -1   16.21    7.03
   8  20   1    1.25    6.62
  10 -20   1   27.36    4.92
  10  20   1   29.49    8.09
 -10 -20  -1   46.03    8.73
  10  20   1   38.40    8.64
 -10  20  -1   30.73    4.65
  12  20   1   53.69    9.59
 -12 -20  -1   39.58    8.77
  12  20   1   43.16    9.31
  14  20   1   51.09    9.73
 -14 -20  -1   53.11    9.89
  14  20   1   43.39    9.50
  16  20   1   12.35    7.56
  16  20   1    2.17    6.98
 -16 -20  -1   14.85    7.52
 -18 -20  -1   18.53    7.86
 -11 -21   1    7.75    6.67
 -11  21   1   11.92    4.33
  11  21  -1   10.62    7.00
 -11  21   1    7.50    4.63
  11 -21  -1    7.23    3.65
  11  21  -1   15.40    6.73
  -9  21   1    1.90    4.29
  -9 -21   1   -5.78    5.27
   9  21  -1    0.21    6.29
  -9  21   1   -0.44    4.33
   9 -21  -1   -2.55    3.64
   9  21  -1  -11.04    5.26
   7  21  -1   -4.47    5.30
   7  21  -1   -7.16    5.44
  -7  21   1   -1.36    4.21
  -7  21   1   15.36    5.31
   7 -21  -1    0.81    4.01
  -7 -21   1    5.83    5.86
  -5  21   1    2.68    4.91
   5 -21  -1   -7.54    3.76
   5  21  -1    5.31    6.03
   5  21  -1   -5.49    4.99
  -5 -21   1   -2.56    5.13
  -5  21   1   -3.67    4.47
   3 -21  -1   22.53    6.18
  -3  21   1    6.35    5.17
  -3  21   1   16.06    5.82
   3  21  -1   13.35    5.74
   3  21  -1   13.60    6.21
  -3 -21   1   15.29    6.37
   1 -21  -1   -5.02    4.58
  -1  21   1   -3.85    4.53
   1  21  -1   -1.93    4.75
  -1  21   1    1.00    5.44
   1  21  -1   -1.82    5.51
  -1 -21   1    7.47    5.04
   1  21   1    1.78    5.64
   1  21   1   -0.10    5.39
  -1  21  -1   -1.64    5.06
  -1 -21  -1    3.11    5.18
   1  21   1   -1.64    4.94
  -1  21  -1    4.75    4.86
   1 -21   1    1.79    4.78
   3  21   1    0.12    5.28
   3  21   1   -5.98    5.41
  -3 -21  -1   -0.84    5.44
  -3  21  -1   -5.29    4.70
  -3  21  -1   -7.31    4.20
   3 -21   1    5.21    4.83
   3  21   1   -0.61    5.44
  -5  21  -1   -4.85    4.30
  -5  21  -1    0.33    4.60
   5  21   1    0.61    5.82
   5 -21   1    2.10    4.24
  -5 -21  -1    3.17    5.61
   5  21   1   -1.65    5.47
   5  21   1    0.71    6.04
  -5  21  -1    2.24    4.42
   7  21   1    9.33    6.80
  -7  21  -1    3.17    4.32
  -7 -21  -1    9.00    6.43
  -7  21  -1    3.80    3.95
   7 -21   1    5.97    4.50
   7  21   1    4.48    6.56
   9  21   1   -1.39    6.06
  -9  21  -1   -3.92    3.39
   9 -21   1   -1.16    3.88
  -9  21  -1   -0.28    3.98
   9  21   1   -2.37    6.02
  -9 -21  -1   -6.04    5.71
  11  21   1  -11.70    5.65
  11 -21   1   -1.46    3.49
  11  21   1    6.15    6.85
 -11 -21  -1   -3.99    6.02
 -50   0   2   41.71    8.97
  50   0  -2   47.17   10.18
 -48   0   2   10.86    6.94
  48   0  -2    1.32    6.63
  46   0  -2   80.66   11.74
 -46   0   2   87.94   11.28
 -44   0   2    1.70    6.36
  44   0  -2    2.38    6.12
  42   0  -2  122.27   13.64
 -42   0   2  153.17   14.81
 -42   0   2  165.62   14.89
 -42   0   2  163.81   15.18
 -40   0   2   43.97    8.72
 -40   0   2   33.17    8.39
 -40   0   2   44.45    9.11
  40   0  -2   30.97    8.18
 -38   0   2   35.01    7.84
  38   0  -2   30.47    8.00
 -38   0   2   49.54    8.87
 -38   0   2   57.15    9.40
 -38   0   2   18.45    7.89
  38   0  -2   36.95    8.23
 -36   0   2   15.55    6.91
 -36   0   2   -8.03    6.79
 -36   0   2   -4.48    5.69
  36   0  -2    2.66    5.78
  36   0  -2    5.34    6.44
 -36   0   2    1.14    5.45
  36   0  -2   -0.22    5.67
 -34   0   2  302.41   20.02
  34   0  -2  323.25   20.76
 -34   0   2  358.37   21.90
 -34   0   2  366.20   22.15
  34   0  -2  354.61   20.95
 -34   0   2  391.73   22.70
  34   0  -2  316.19   21.30
 -32   0   2    0.14    5.42
 -32   0   2    2.76    5.76
  32   0  -2    0.59    4.83
 -32   0   2    4.38    6.80
  32   0  -2    4.93    5.65
 -32   0   2    1.06    5.96
  32   0  -2   11.52    5.91
 -30   0   2   10.92    5.23
  30   0  -2    0.94    5.29
  30   0  -2   14.00    5.65
  30   0  -2   26.11    6.50
 -30   0   2   15.41    6.13
  30   0  -2   17.28    5.78
 -30   0   2   21.94    7.30
 -30   0   2   22.10    6.41
 -28   0   2   -0.93    4.64
  28   0  -2    4.97    4.58
 -28   0   2    2.93    4.80
  28   0  -2   -0.24    4.65
  28   0  -2    9.58    5.32
  28   0  -2    2.71    4.54
 -28   0   2   -1.73    5.08
  26   0  -2   41.36    6.39
 -26   0   2   29.01    5.55
 -26   0   2   41.41    6.57
  26   0  -2   37.63    6.08
  26   0  -2   36.19    6.30
 -26   0   2   29.76    6.29
  26   0  -2   37.53    6.43
  24   0  -2    7.79    4.76
  24   0  -2    8.11    4.35
  24   0  -2    6.25    4.25
 -24   0   2    0.61    4.51
  24   0  -2    4.52    4.22
 -24   0   2    4.23    4.24
 -24   0   2   -1.16    4.26
  22   0  -2 1576.46   66.82
  22   0  -2 1599.19   67.56
  22   0  -2 1452.61   67.27
  22   0  -2 1469.67   66.32
 -22   0   2 1527.28   67.11
 -22   0   2 1551.52   67.03
  20   0  -2   -2.27    3.34
  20   0  -2   -3.26    3.69
  20   0  -2    2.03    3.59
  20   0  -2    2.03    3.14
 -20   0   2    0.14    3.92
 -20   0   2   -0.67    3.64
 -20   0   2   -2.20    3.45
  18   0  -2  282.99   15.65
  18   0  -2  295.18   15.66
 -18   0   2  305.98   16.15
  18   0  -2  292.64   15.88
 -18   0   2  281.52   15.90
 -18   0   2  284.94   15.59
  18   0  -2  277.66   15.85
 -16   0   2    3.04    3.33
 -16   0   2   -1.66    2.95
  16   0  -2    4.18    3.52
  16   0  -2   -0.82    3.05
  16   0  -2    3.13    3.81
  16   0  -2   -2.86    3.22
 -16   0   2   -1.65    3.26
 -14   0   2   23.78    3.86
 -14   0   2   11.95    3.98
  14   0  -2   15.02    3.98
  14   0  -2   15.37    4.27
  14   0  -2   12.89    3.77
 -14   0   2   12.34    3.82
  14   0  -2   20.66    3.85
 -14   0   2    9.05    3.76
 -12   0   2    2.83    3.65
 -12   0   2   11.17    3.66
  12   0  -2    7.20    3.71
  12   0  -2    5.93    3.77
 -12   0   2    3.01    3.59
  12   0  -2    6.19    3.50
 -12   0   2    3.22    3.26
  12   0  -2    3.51    3.05
  10   0  -2  394.17   19.07
  10   0  -2  398.70   19.19
 -10   0   2  390.52   19.15
 -10   0   2  416.33   19.36
 -10   0   2  406.76   19.15
 -10   0   2  410.48   19.27
  10   0  -2  417.71   19.21
  10   0  -2  436.06   19.43
   8   0  -2   40.68    4.01
  -8   0   2   40.46    4.04
   8   0  -2   33.81    3.84
  -8   0   2   37.72    3.42
   8   0  -2   41.99    3.93
   8   0  -2   38.38    3.76
   8   0  -2   38.40    3.88
  -8   0   2   39.83    3.81
  -8   0   2   33.55    3.76
  -6   0   2 1610.40   67.40
  -6   0   2 1665.73   66.91
   6   0  -2 1641.34   66.90
  -6   0   2 1693.15   67.50
   6   0  -2 1462.40   67.25
   6   0  -2 1638.39   67.41
   6   0  -2 1579.47   66.76
   0   0  -2   28.75    2.36
   0   0   2   15.58    2.12
  -2   0  -2  841.69   34.39
   2   0   2  866.57   35.77
  -2   0  -2  841.12   35.98
   2   0   2  832.27   35.71
  -2   0  -2  825.34   35.74
   2   0   2  864.34   36.05
   4   0   2    3.79    2.10
  -4   0  -2    0.38    1.71
   4   0   2    3.57    2.16
  -4   0  -2    2.60    2.26
   4   0   2    0.86    1.81
  -4   0  -2    3.32    1.98
   4   0   2    1.54    1.44
   4   0   2    1.31    1.62
  -4   0  -2    2.79    1.58
  -4   0  -2    2.41    2.01
  -6   0  -2 4904.98  198.33
  -6   0  -2 4509.53  196.37
   6   0   2 5112.52  197.08
  -6   0  -2 4878.34  197.72
  -6   0  -2 4753.52  196.51
  -6   0  -2 4842.35  198.37
   6   0   2 4878.89  198.49
  -6   0  -2 4627.14  196.45
   6   0   2 4648.32  196.37
   6   0   2 5052.28  198.53
   6   0   2 4939.03  196.59
   6   0   2 4822.80  190.85
  -8   0  -2  490.32   22.33
   8   0   2  478.39   20.92
  -8   0  -2  497.93   20.95
   8   0   2  475.46   22.20
   8   0   2  491.94   22.52
   8   0   2  489.37   22.27
  -8   0  -2  484.07   22.41
  -8   0  -2  492.91   22.29
  -8   0  -2  460.75   22.20
   8   0   2  468.73   21.05
   8   0   2  507.15   22.52
 -10   0  -2 9510.32  389.66
  10   0   2 9509.29  389.41
  10   0   2 9622.13  389.50
 -10   0  -2 9250.57  394.52
 -10   0  -2 9998.85  389.86
  10   0   2 9706.96  389.54
  10   0   2 9990.19  393.54
  10   0   2 9404.19  391.65
 -10   0  -2 9625.92  393.23
  10   0   2 9134.33  393.23
 -10   0  -2 9988.46  393.34
 -12   0  -2  511.48   23.00
  12   0   2  479.81   22.84
  12   0   2  498.76   22.87
  12   0   2  496.27   23.21
 -12   0  -2  483.18   23.00
 -12   0  -2  485.42   22.86
 -12   0  -2  489.80   23.14
  12   0   2  474.47   23.12
  12   0   2  466.10   22.75
 -12   0  -2  479.29   21.47
  14   0   2 4249.17  175.23
 -14   0  -2 4230.40  175.29
 -14   0  -2 4213.02  176.75
 -14   0  -2 4289.17  175.61
  14   0   2 4274.31  177.22
  14   0   2 4165.99  175.13
 -14   0  -2 4311.59  175.57
  14   0   2 4477.93  177.34
  14   0   2 4186.28  175.13
  16   0   2  251.73   14.04
  16   0   2  235.22   13.62
  16   0   2  222.48   13.42
 -16   0  -2  251.28   13.66
  16   0   2  277.82   14.39
  16   0   2  232.29   13.64
 -16   0  -2  238.84   14.00
 -16   0  -2  242.12   14.05
 -16   0  -2  249.48   12.42
  18   0   2 7767.22  317.26
  18   0   2 7544.15  320.69
 -18   0  -2 7842.34  318.74
  18   0   2 7831.23  317.30
 -18   0  -2 7543.43  317.60
  18   0   2 8235.91  320.98
 -18   0  -2 7791.19  320.21
 -18   0  -2 7669.24  317.83
  20   0   2  190.42   12.79
 -20   0  -2  210.23   13.57
 -20   0  -2  221.74   12.97
 -20   0  -2  194.12   11.71
  20   0   2  258.44   14.32
  20   0   2  220.91   13.24
  20   0   2  220.92   13.66
 -20   0  -2  199.34   13.36
  22   0   2  994.70   45.20
 -22   0  -2  962.16   44.11
 -22   0  -2  997.48   42.92
 -22   0  -2  931.04   44.45
  22   0   2  932.31   43.88
  22   0   2  939.23   43.89
  22   0   2  999.97   44.88
 -22   0  -2  960.48   44.61
  24   0   2   53.50    7.38
  24   0   2   46.92    6.65
 -24   0  -2   43.22    5.61
 -24   0  -2   63.36    7.67
  24   0   2   39.59    6.38
  24   0   2   49.62    6.79
 -24   0  -2   34.09    6.73
 -24   0  -2   45.08    6.16
  26   0   2  806.35   38.08
  26   0   2  847.41   39.19
 -26   0  -2  788.86   36.64
 -26   0  -2  784.91   37.88
  26   0   2  779.27   37.94
 -26   0  -2  784.61   38.80
 -26   0  -2  784.95   38.91
  26   0   2  793.05   39.17
  28   0   2   73.29    8.72
  28   0   2   59.97    8.50
 -28   0  -2   53.22    7.13
  28   0   2   51.37    8.06
  28   0   2   56.50    8.02
 -28   0  -2   55.84    8.31
 -28   0  -2   73.01    9.01
 -28   0  -2   63.68    7.13
 -30   0  -2  859.35   41.81
 -30   0  -2  841.50   39.06
  30   0   2  826.27   40.42
  30   0   2  713.87   40.84
 -30   0  -2  816.35   40.18
  30   0   2  868.83   41.97
  30   0   2  877.33   40.83
 -30   0  -2  894.65   42.16
  32   0   2    5.97    5.76
 -32   0  -2    1.76    4.95
  32   0   2   12.07    6.21
 -32   0  -2    1.38    5.80
  32   0   2    2.90    5.88
 -32   0  -2   -2.59    4.26
 -32   0  -2   -0.80    5.64
 -34   0  -2  457.38   27.86
  34   0   2  447.34   26.57
  34   0   2  508.27   28.66
 -34   0  -2  534.24   28.93
 -34   0  -2  465.14   26.34
 -34   0  -2  494.74   25.53
 -36   0  -2   20.96    8.04
 -36   0  -2   43.61    7.11
  36   0   2   38.72    8.29
 -36   0  -2   34.33    6.97
 -36   0  -2   40.25    8.98
 -38   0  -2  113.98   12.71
  38   0   2  109.03   12.34
 -38   0  -2   98.19    9.96
 -38   0  -2  132.66   13.26
 -40   0  -2   12.32    7.24
  40   0   2    3.39    6.17
 -40   0  -2   15.20    5.55
 -40   0  -2    1.95    6.84
  42   0   2  319.55   23.83
 -42   0  -2  362.70   21.05
  44   0   2   -2.56    6.64
  46   0   2   73.62   11.77
  48   0   2   12.55    8.03
  49   1  -2   29.99    8.87
  49  -1  -2   13.46    7.62
 -49  -1   2   33.62    8.16
 -49   1   2   38.57    8.73
  47   1  -2   36.05    8.85
  47  -1  -2   21.79    8.11
 -47  -1   2   54.10    9.80
 -47   1   2   40.64    9.25
 -45  -1   2   53.84    9.78
  45  -1  -2   47.40    9.85
 -45   1   2   63.38   10.15
  45   1  -2   60.15   10.51
 -43   1   2   13.45    7.07
  43   1  -2   25.11    7.67
 -43   1   2   23.82    7.73
  43  -1  -2   17.34    6.85
 -43   1   2   13.74    7.33
 -43  -1   2   16.82    6.91
 -41  -1   2    1.21    6.33
  41   1  -2    8.78    6.50
 -41  -1   2    6.84    6.96
 -41  -1   2    9.02    6.81
 -41   1   2    2.64    6.13
 -41   1   2   -9.89    5.71
 -41   1   2    3.18    6.08
  41  -1  -2    9.10    6.46
 -39  -1   2   53.78    9.61
 -39   1   2   52.40    9.89
 -39  -1   2   49.01    8.51
  39  -1  -2   63.80    9.34
 -39   1   2   56.90    9.32
  39   1  -2   52.80    9.19
 -39   1   2   54.72    9.33
 -39  -1   2   49.47    9.51
  39   1  -2   49.22    9.05
 -39  -1   2   63.73   10.04
  37   1  -2   98.24   11.50
  37   1  -2  100.35   11.15
 -37  -1   2   95.80   11.87
  37  -1  -2  100.35   11.44
 -37  -1   2   97.53   11.63
 -37   1   2   94.91   11.37
 -37  -1   2  108.25   11.94
  37   1  -2  115.76   12.12
 -37   1   2  103.68   11.81
 -37   1   2   87.54   10.17
 -37  -1   2  104.72   10.92
 -37   1   2  103.74   12.10
 -35  -1   2   52.50    9.34
 -35  -1   2   65.49    9.53
  35   1  -2   44.45    8.24
  35   1  -2   41.30    8.36
 -35   1   2   28.26    7.13
  35  -1  -2   59.49    8.61
 -35  -1   2   28.25    7.33
 -35   1   2   47.37    8.87
 -35   1   2   40.99    8.96
 -35   1   2   53.45    8.64
 -35  -1   2   52.83    9.31
  35   1  -2   28.22    7.46
  35  -1  -2   40.57    7.89
  33   1  -2   60.37    8.83
  33  -1  -2   53.93    7.91
  33   1  -2   49.41    8.14
  33  -1  -2   84.25    9.33
  33  -1  -2   65.64    9.08
 -33   1   2   48.84    8.59
 -33  -1   2   74.10    9.77
 -33   1   2   60.73    9.61
 -33  -1   2   61.49    8.68
 -33   1   2   66.55    9.24
  33  -1  -2   45.51    8.02
 -33  -1   2   65.73    9.39
  33   1  -2   81.75    9.35
 -33   1   2   53.75    8.05
 -31  -1   2   73.18    9.31
  31  -1  -2   63.53    8.20
  31  -1  -2   63.39    8.26
 -31  -1   2   75.78    9.47
  31  -1  -2   86.23    9.71
 -31   1   2   61.70    7.95
 -31  -1   2   65.49    8.33
 -31   1   2   76.27    9.29
  31   1  -2   67.67    8.75
 -31   1   2   57.62    8.58
  31  -1  -2   55.50    8.19
 -31   1   2   75.97    9.98
  31   1  -2   72.07    8.89
  31   1  -2   72.52    8.84
 -29  -1   2   48.91    7.33
  29  -1  -2   46.61    6.92
 -29   1   2   44.81    8.08
  29  -1  -2   47.28    7.30
  29  -1  -2   39.08    6.83
  29   1  -2   51.87    7.54
 -29   1   2   50.38    6.86
  29   1  -2   47.29    7.51
 -29  -1   2   38.97    7.50
 -29   1   2   52.85    7.88
 -29  -1   2   45.36    7.58
  29  -1  -2   36.95    7.06
  29   1  -2   55.64    7.73
 -29   1   2   47.38    7.43
 -27   1   2  120.78   10.31
  27  -1  -2  112.83    9.53
 -27  -1   2  107.13    9.68
 -27   1   2  105.58   10.48
  27   1  -2  116.68   10.18
 -27  -1   2   99.45   10.03
 -27   1   2  103.11    9.01
  27   1  -2  104.00   10.13
 -27   1   2  112.87   10.21
  27   1  -2  110.56   10.07
  27  -1  -2  110.78    9.51
  27  -1  -2  104.07    9.74
  27  -1  -2  110.02    9.80
  27   1  -2  104.08   10.08
  25  -1  -2   57.39    7.35
 -25   1   2   57.18    8.09
 -25   1   2   58.09    6.68
  25   1  -2   80.19    8.10
  25   1  -2   57.10    7.35
 -25  -1   2   72.27    8.15
  25  -1  -2   59.30    7.05
  25   1  -2   67.75    7.81
 -25  -1   2   68.71    7.62
  25  -1  -2   52.07    6.83
  25   1  -2   73.40    7.81
 -25   1   2   60.57    7.31
 -25  -1   2   69.31    7.99
 -25   1   2   70.09    7.69
  25  -1  -2   60.70    7.03
 -23   1   2  219.27   13.79
 -23   1   2  200.13   12.85
 -23  -1   2  228.52   14.30
  23   1  -2  198.20   13.36
  23   1  -2  224.05   13.97
 -23  -1   2  199.50   13.69
  23   1  -2  183.55   13.36
 -23   1   2  200.65   13.44
 -23  -1   2  208.64   13.48
 -23   1   2  202.05   14.20
  23   1  -2  215.21   13.80
  23  -1  -2  230.20   13.27
  23  -1  -2  213.89   13.55
  23  -1  -2  208.98   13.12
  23  -1  -2  208.69   13.44
  21   1  -2  423.76   22.10
  21   1  -2  443.87   22.42
  21   1  -2  434.79   22.35
 -21  -1   2  412.51   21.98
  21  -1  -2  404.89   21.28
 -21   1   2  409.29   21.83
  21  -1  -2  439.56   22.07
  21   1  -2  414.52   22.36
 -21   1   2  422.79   22.03
  21  -1  -2  441.18   22.22
 -21  -1   2  411.86   22.34
 -21   1   2  441.33   21.67
 -21  -1   2  438.23   22.57
  21  -1  -2  422.06   21.54
 -19  -1   2   15.37    4.57
  19   1  -2   24.03    4.76
  19  -1  -2   27.25    4.55
  19  -1  -2   25.06    4.43
  19  -1  -2   30.89    4.94
  19   1  -2   31.94    4.88
  19  -1  -2   23.58    4.27
 -19   1   2   27.28    4.60
 -19  -1   2   15.03    4.42
  19   1  -2   24.70    4.84
  19   1  -2   27.38    5.06
 -19   1   2   22.99    4.80
 -19  -1   2   23.31    4.80
 -19   1   2   22.86    4.36
  17  -1  -2   77.69    6.88
 -17  -1   2  103.47    8.06
 -17   1   2   90.30    7.36
 -17  -1   2   89.80    7.50
  17   1  -2  101.63    7.86
  17  -1  -2   90.40    7.11
  17   1  -2  101.45    7.80
  17  -1  -2   88.07    7.14
 -17   1   2   78.57    7.10
 -17   1   2   84.77    6.99
  17   1  -2   93.36    7.70
  17  -1  -2  103.84    7.58
  17   1  -2   86.86    7.57
 -17  -1   2   96.14    7.77
 -15  -1   2  125.44    8.10
 -15   1   2  105.20    7.48
 -15  -1   2  105.95    7.92
 -15   1   2  108.06    7.24
 -15   1   2  104.53    7.70
  15  -1  -2  112.13    7.83
 -15   1   2  104.50    7.61
  15   1  -2  101.41    7.95
 -15  -1   2   99.96    7.86
  15   1  -2   94.12    7.58
 -15  -1   2  110.73    7.88
  15  -1  -2   86.58    7.15
  15   1  -2  107.02    7.97
[truncated: 2,065,122 more chars]
